# Supplementary material for: High-content synaptic phenotyping in human cellular models reveals a role for BET proteins in synapse assembly
Source: eLife. 2023 Apr 21;12:e80168. doi: 10.7554/eLife.80168 (PMC10121225; doi:10.7554/eLife.80168)
Supplement: Supplementary file 1. [file elife-80168-supp1.xlsx]

## Sheet: Sheet1
Molecule Name	Synonyms	Library	Supplier	Cat #	Target	Note	Pathway
RL-0069753	Enzastaurin, Enzastaurin (LY317615), RL-0074322	Target Selective	Selleck	S1055	PKC	Enzastaurin (LY317615) is a potent PKCŒ≤ selective inhibitor with IC50 of 6 nM, 6- to 20-fold selectivity against PKCŒ±, PKCŒ≥ and PKCŒµ. Phase 3.	TGF-beta/Smad
RL-0061452	SU-11274	Target Selective	Selleck	S1080	c-Met	SU11274 is a selective Met inhibitor with IC50 of 10 nM, no effects on PGDFR√Ø_, EGFR or Tie2.	Protein Tyrosine Kinase
RL-0069804	PF-04217903	Target Selective	Selleck	S1094	c-Met	PF-04217903 is a selective ATP-competitive c-Met inhibitor with IC50 of 4.8 nM, susceptible to oncogenic mutations (no activity to Y1230C mutant). Phase 1.	Protein Tyrosine Kinase
RL-0070144	GSK-690693	Target Selective	Selleck	S1113	Akt	GSK690693 is a pan-Akt inhibitor targeting Akt1/2/3 with IC50 of 2 nM/13 nM/9 nM, also sensitive to the AGC kinase family: PKA, PrkX and PKC isozymes. Phase 1.	PI3K/Akt/mTOR
RL-0074757	Ivacaftor (VX-770)	Target Selective	Selleck	S1144	CFTR	Ivacaftor (VX-770) is a potentiator of CFTR targeting G551D-CFTR and F508del-CFTR with EC50 of 100 nM and 25 nM, respectively.	Transmembrane Transporters
RL-0074762	MK-2866 (GTx-024)	Target Selective	Selleck	S1174	Androgen Receptor	MK-2866 (GTx-024) is a selective androgen receptor modulator (SARM) with Ki of 3.8 nM, and is tissue-selective for anabolic organs. Phase 3.	Endocrinology & Hormones
RL-0000046	Finasteride	Target Selective	Selleck	S1197	5-alpha Reductase	Finasteride is an inhibitor of steroid Type II 5√Ø¬±-reductase.	Endocrinology & Hormones
RL-0074768	Agomelatine	Target Selective	Selleck	S1243	5-HT Receptor	Agomelatine is classified as a norepinephrine-dopamine disinhibitor (NDDI) due to its antagonism of the 5-HT2C receptor.	Neuronal Signaling
RL-0070037	GDC 0941 bismesylate, GDC-0941	Target Selective	Selleck	S1065	PI3K	GDC-0941 is a potent inhibitor of PI3KŒ±/Œ¥ with IC50 of 3 nM, with modest selectivity against p110Œ≤ (11-fold) and p110Œ≥ (25-fold).	PI3K/Akt/mTOR
RL-0069759	Belinostat(PXD101)	Target Selective	Selleck	S1085	HDAC	Belinostat (PXD101) is a novel HDAC inhibitor with IC50 of 27 nM, with activity demonstrated in cisplatin-resistant tumors. Phase 1/2.	Epigenetics
RL-0074752	BTZ043 Racemate	Target Selective	Selleck	S1097	Others	BTZ043 racemate is a decaprenylphosphoryl-Œ≤-D-ribose 2'-epimerase (DprE1) inhibitor acting as a new antimycobacterial agent that kill Mycobacterium tuberculosis.	Others
RL-0069709	Odanacatib (MK-0822)	Target Selective	Selleck	S1115	Cathepsin K	Odanacatib (MK 0822) is a potent, selective, and neutral inhibitor of cathepsin K (human/rabbit) with IC50 of 0.2 nM/1 nM, and demonstrated high selectivity versus off-target cathepsin B, L, S. Phase 3.	Others
RL-0070152	SNS-032 (BMS387032)	Target Selective	Selleck	S1145	CDK	SNS-032 has firstly been described as a selective inhibitor of CDK2 with IC50 of 48 nM and is 10- and 20-fold selective over CDK1/CDK4. It is also found to be sensitive to CDK7/9 with IC50 of 62 nM/4 nM, with little effect on CDK6. Phase 1.	Cell Cycle
RL-0041158	XAV-939	Target Selective	Selleck	S1180	Wnt/beta-catenin	XAV-939 selectively inhibits Wnt/Œ≤-catenin-mediated transcription through tankyrase1/2 inhibition with IC50 of 11 nM/4 nM, regulates axin levels and does not affect CRE, NF-Œ∫B or TGF-Œ≤.	Stem Cells & Wnt
RL-0074765	Irinotecan	Target Selective	Selleck	S1198	Topoisomerase	Irinotecan is a topoisomerase I inhibitor for LoVo cells and HT-29 cells with IC50 of 15.8 ŒºM and 5.17 ŒºM, respectively.	DNA Damage
RL-0074769	Enzalutamide (MDV3100)	Target Selective	Selleck	S1250	Androgen Receptor	Enzalutamide (MDV3100) is an androgen-receptor (AR) antagonist with IC50 of 36 nM.	Endocrinology & Hormones
RL-0062633	4-(5-Benzol[1,3]dioxol-5-yl-4-pyrldin-2-yl-1H-imidazol-2-yl)-benzamide hydrate, SB 431542	Target Selective	Selleck	S1067	TGF-beta/Smad	SB431542 is a potent and selective inhibitor of ALK5 with IC50 of 94 nM, 100-fold more selective for ALK5 than p38 MAPK and other kinases.	TGF-beta/Smad
RL-0069801	BSI-201, Iniparib (BSI-201)	Target Selective	Selleck	S1087	PARP	BSI-201 (Iniparib, SAR240550) is a PARP1 inhibitor with demonstrated effectiveness in triple-negative breast cancer (TNBC). Phase 3.	DNA Damage
RL-0073761	MLN8054	Target Selective	Selleck	S1100	Aurora Kinase	MLN8054 is a potent and selective inhibitor of Aurora A with IC50 of 4 nM. It is more than 40-fold selective for Aurora A than Aurora B. Phase 1.	Cell Cycle
RL-0074753	Palbociclib (PD-0332991) HCl	Target Selective	Selleck	S1116	CDK	PD0332991 is a highly selective inhibitor of CDK4/6 with IC50 of 11 nM/16 nM. It shows no activity against CDK1/2/5, EGFR, FGFR, PDGFR, InsR, etc. Phase 2/3.	Cell Cycle
RL-0074758	SNS-314 Mesylate	Target Selective	Selleck	S1154	Aurora Kinase	SNS-314 Mesylate is a potent and selective inhibitor of Aurora A, Aurora B and Aurora C with IC50 of 9 nM, 31 nM, and 3 nM, respectively. It is less potent to Trk A/B, Flt4, Fms, Axl, c-Raf and DDR2. Phase 1.	Cell Cycle
RL-0074763	BIBR 1532	Target Selective	Selleck	S1186	Telomerase	BIBR 1532 is a potent, selective, non-competitive telomerase inhibitor with IC50 of 100 nM.	DNA Damage
RL-0074766	Dutasteride	Target Selective	Selleck	S1202	5-alpha Reductase	Dutasteride is a dual 5-Œ± reductase inhibitor that inhibits conversion of testosterone to dihydrotestosterone (DHT).	Endocrinology & Hormones
RL-0001955	RAMELTEON	Target Selective	Selleck	S1259	MT Receptor	Ramelteon is a novel melatonin receptor agonist for human MT1 and MT2 receptors and chick forebrain melatonin receptors with Ki of 14 pM, 112 pM and 23.1 pM, respectively.	GPCR & G Protein
RL-0069756	AUY922 (NVP-AUY922), NVP-AUY922	Target Selective	Selleck	S1069	HSP (e.g. HSP90)	AUY922 (NVP-AUY922) is a highly potent HSP90 inhibitor for HSP90Œ±/Œ≤ with IC50 of 13 nM /21 nM, weaker potency against the HSP90 family members GRP94 and TRAP-1, exhibits the tightest binding of any small-molecule HSP90 ligand. Phase 1/2.	Cytoskeletal Signaling
RL-0074324	NVP-ADW742	Target Selective	Selleck	S1088	IGF-1R	NVP-ADW742 is an IGF-1R inhibitor with IC50 of 0.17 √Ø_M, >16-fold more potent against IGF-1R than InsR; little activity to HER2, PDGFR, VEGFR-2, Bcr-Abl and c-Kit.	Protein Tyrosine Kinase
RL-0001204	1,4-Diamino-2,3-dicyano-1,4-bis[2-aminophenylthio]butadiene, U-0126, U0126-EtOH	Target Selective	Selleck	S1102	MEK	U0126-EtOH is a highly selective inhibitor of MEK1/2 with IC50 of 0.07 √Ø_M/0.06 √Ø_M, 100-fold higher affinity for √Ø√ìN3-S218E/S222D MEK than PD098059.	MAPK
RL-0074325	Everolimus (RAD001)	Target Selective	Selleck	S1120	mTOR	Everolimus (RAD001) is an mTOR inhibitor of FKBP12 with IC50 of 1.6-2.4 nM.	PI3K/Akt/mTOR
RL-0064662	S3I-201, STAT3 Inhibitor VI, S3I-201	Target Selective	Selleck	S1155	STAT	S3I-201 shows potent inhibition of STAT3 DNA-binding activity with IC50 of 86 ŒºM, and low activity towards STAT1 and STAT5.	JAK/STAT
RL-0061957	ANASTROZOLE	Target Selective	Selleck	S1188	Aromatase	Anastrozole is a third-generation nonsteroidal selective aromatase inhibitor.	Endocrinology & Hormones
RL-0000945	(¬±)-Bisoprolol hemifumarate, Bisoprolol fumarate, Bisoprolol hemifumarate salt	Target Selective	Selleck	S1206	Adrenergic Receptor	Bisoprolol is a selective type √Ø_1 adrenergic receptor blocker.	Neuronal Signaling
RL-0074770	Cinacalcet HCl	Target Selective	Selleck	S1260	CaSR	AMG-073 represents a new class of compounds for the treatment of hyperparathyroidism.	GPCR & G Protein
RL-0074749	PHA-665752	Target Selective	Selleck	S1070	c-Met	PHA-665752 is a potent, selective and ATP-competitive c-Met inhibitor with IC50 of 9 nM, >50-fold selectivity for c-Met than RTKs or STKs.	Protein Tyrosine Kinase
RL-0074750	Refametinib (RDEA119, Bay 86-9766)	Target Selective	Selleck	S1089	MEK	Refametinib (RDEA119, Bay 86-9766) is a potent, ATP non-competitive and highly selective inhibitor of MEK1 and MEK2 with IC50 of 19 nM and 47 nM, respectively.	MAPK
RL-0063118	N-[4-[[6-Methoxy-7-[3-(4-morpholinyl)propoxy]-4-quinazolinyl]amino]phenyl]benzamide, ZM 447439	Target Selective	Selleck	S1103	Aurora Kinase	ZM 447439 is a selective and ATP-competitive inhibitor for Aurora A and Aurora B with IC50 of 110 nM and 130 nM, respectively. It is more than 8-fold selective for Aurora A/B than MEK1, Src, Lck and has little effect againstCDK1/2/4, Plk1, Chk1, etc.	Cell Cycle
RL-0070430	SRT1720	Target Selective	Selleck	S1129	Sirtuin	SRT1720 is a selective SIRT1 activator with EC50 of 0.16 ŒºM, but is >230-fold less potent for SIRT2 and SIRT3.	Epigenetics
RL-0074759	CEP-18770 (Delanzomib)	Target Selective	Selleck	S1157	Proteasome	CEP-18770 is an orally active inhibitor of the chymotrypsin-like activity of proteasome with IC50 of 3.8 nM, with only marginal inhibition of the tryptic and peptidylglutamyl activities of the proteosome. Phase 1/2.	Proteases
RL-0062621	Aprepitant	Target Selective	Selleck	S1189	Substance P	Aprepitant is a potent and selective neurokinin-1 receptor antagonist.	Others
RL-0000020	Methotrexate	Target Selective	Selleck	S1210	DHFR	Methotrexate is an antimetabolite and antifolate drug, which acts by inhibiting the metabolism of folic acid.	Metabolism
RL-0001819	CELECOXIB	Target Selective	Selleck	S1261	COX	Celecoxib is a selective COX-2 inhibitor with IC50 of 40 nM.	Neuronal Signaling
RL-0005673	2-Amino-6-bromo-a-cyano-3-(ethoxycarbonyl)-4H-1-benzopyran-4-acetic acid ethyl ester, HA14-1	Target Selective	Selleck	S1071	Bcl-2	HA14-1 is a non-peptidic ligand of a Bcl-2 surface pocket with IC50 of ~9 √Ø_M.	Apoptosis
RL-0074751	OSI-906 (Linsitinib)	Target Selective	Selleck	S1091	IGF-1R	OSI-906 (Linsitinib) is a selective inhibitor of IGF-1R with IC50 of 35 nM; modestly potent to InsR with IC50 of 75 nM, and no activity towards Abl, ALK, BTK, EGFR, FGFR1/2, PKA etc. Phase 3.	Protein Tyrosine Kinase
RL-0069781	OSU-03012 (AR-12), OSU03012	Target Selective	Selleck	S1106	PDK-1	OSU-03012 is a potent inhibitor of recombinant PDK-1 with IC50 of 5 ŒºM and 2-fold increase in potency over OSU-02067.	PI3K/Akt/mTOR
RL-0074754	YM155 (Sepantronium Bromide)	Target Selective	Selleck	S1130	Survivin	YM155 is a potent survivin suppressant by inhibiting Survivin promoter activity with IC50 of 0.54 nM; does not significantly inhibit SV40 promoter activity, but is observed to slightly inhibit the interaction of Survivin with XIAP. Phase 1/2.	Apoptosis
RL-0074760	MK-8245	Target Selective	Selleck	S1158	Dehydrogenase	MK-8245 is an liver-targeting inhibitor of stearoyl-CoA desaturase (SCD) with IC50 of 1 nM for human SCD1 and 3 nM for both rat SCD1 and mouse SCD1, with anti-diabetic and anti-dyslipidemic efficacy. Phase 2.	Metabolism
RL-0062619	Fulvestrant	Target Selective	Selleck	S1191	Estrogen/progestogen Receptor	Fulvestrant is an estrogen receptor (ER) antagonist with IC50 of 0.094 nM.	Endocrinology & Hormones
RL-0074229	PFI-1, PFI-1 (PF-6405761)	Target Selective	Selleck	S1216	Epigenetic Reader Domain	PFI-1 is a selective BET (bromodomain-containing protein) inhibitor for BRD4 with IC50 of 0.22 ŒºM.	Epigenetics
RL-0071476	PLX4032 (RG7204 RO5185426), Vemurafenib (PLX4032, RG7204)	Target Selective	Selleck	S1267	Raf	Vemurafenib (PLX4032, RG7204) is a novel and potent inhibitor of B-RafV600E with IC50 of 31 nM.	MAPK
RL-0074568	Thiazovivin	Target Selective	Selleck	S1459	ROCK	Thiazovivin (Tzv) is a novel ROCK inhibitor with IC50 of 0.5 √´_M, promotes hESC survival after single-cell dissociation.	Cell Cycle
RL-0074337	LY2228820	Target Selective	Selleck	S1494	p38 MAPK	LY2228820 is a novel and potent inhibitor of p38 MAPK with IC50 of 7 nM, does not alter p38 MAPK activation. Phase 1/2.	MAPK
RL-0074786	DMXAA (Vadimezan)	Target Selective	Selleck	S1537	VDA	DMXAA (Vadimezan) is a vascular disrupting agents (VDA) and competitive inhibitor of DT-diaphorase with Ki of 20 ŒºM and IC50 of 62.5 ŒºM, respectively. Phase 3.	Angiogenesis
RL-0074791	Pomalidomide	Target Selective	Selleck	S1567	TNF-alpha	Pomalidomide inhibits LPS-induced TNF-Œ± release with IC50 of 13 nM.	Apoptosis
RL-0002712	RIZATRIPTAN, RIZATRIPTAN BENZOATE	Target Selective	Selleck	S1607	5-HT Receptor	Rizatriptan Benzoate(Maxalt) is a 5-HT1 agonist triptan drug for the treatment of migraine headaches.	Neuronal Signaling
RL-0001881	CARVEDILOL, CARVEDILOL TARTRATE	Target Selective	Selleck	S1831	Adrenergic Receptor	Carvedilol is a non-selective beta blocker/alpha-1 blocker with an IC50 of 3.8 ŒºM for inhibition of LDL oxidation.	Neuronal Signaling
RL-0069810	Elvitegravir (GS-9137, JTK-303), Elvitegravir (JTK 303)	Target Selective	Selleck	S2001	Integrase	Elvitegravir (EVG, JTK-303/GS-9137) is an HIV integrase inhibitor for HIV-1 IIIB, HIV-2 EHO and HIV-2 ROD with IC50 of 0.7 nM, 2.8 nM and 1.4 nM, respectively.	Microbiology
RL-0000299	Cyproterone acetate	Target Selective	Selleck	S2042	Androgen Receptor	Cyproterone acetate is an androgen receptor (AR) antagonist with IC50 of 7.1 nM, as well as a weak progesterone receptor agonist with weak pro-gestational and glucocorticoid activity.	Endocrinology & Hormones
RL-0000470	Anthra[1-9-cd]pyrazol-6(2H)-one, SP 600125, SP600125 (JNK Inhibitor II)	Target Selective	Selleck	S1460	JNK	SP600125 is a broad-spectrum JNK inhibitor for JNK1, JNK2 and JNK3 with IC50 of 40 nM, 40 nM and 90 nM, respectively; 10-fold greater selectivity against MKK4, 25-fold greater selectivity against MKK3, MKK6, PKB, and PKCŒ±, and 100-fold selectivity against ERK2, p38, Chk1, EGFR etc.	MAPK
RL-0074784	Pralatrexate	Target Selective	Selleck	S1497	DHFR	Pralatrexate(Folotyn) is an antifolate, and structurally a folate analog. Its IC50 is < 300 nM in some cell lines.	Metabolism
RL-0062164	6-Chloro-2,3,4,9-tetrahydro-1H-carbazole-1-carboxamide, EX 527 (Selisistat)	Target Selective	Selleck	S1541	Sirtuin	EX 527 is a potent and selective SIRT1 inhibitor with IC50 of 38 nM, exhibits >200-fold selectivity against SIRT2 and SIRT3.	Epigenetics
RL-0074346	KU-60019	Target Selective	Selleck	S1570	ATM/ATR	KU-60019 is an improved analogue of KU-55933, with IC50 of 6.3 nM for ATM, 270- and 1600-fold more selective for ATM than DNA-PK and ATR,and is a highly effective radiosensitizer.	DNA Damage
RL-0002931	Naproxen	Target Selective	Selleck	S1626	COX	Naproxen is a COX inhibitor for COX-1 and COX-2 with IC50 of 8.7 ŒºM and 5.2 ŒºM, respectively.	Neuronal Signaling
RL-0000258	Clemastine, Clemastine fumarate, RL-0003018	Target Selective	Selleck	S1847	Histamine Receptor	Clemastine Fumarate (Clemastine) is a selective histamine H1 receptor antagonist with IC50 of 3 nM.	Neuronal Signaling
RL-0074797	Maraviroc	Target Selective	Selleck	S2003	CCR	Maraviroc is a CCR5 antagonist for MIP-1Œ±, MIP-1Œ≤ and RANTES with IC50 of 3.3 nM, 7.2 nM and 5.2 nM, respectively.	Microbiology
RL-0000853	MEMANTINE HCl, Memantine, Memantine hydrochloride	Target Selective	Selleck	S2043	AMPA Receptor-kainate Receptor-NMDA Receptor	Memantine hydrochloride (Namenda) is a CYP2B6 and CYP2D6 inhibitor for recombinant CYP2B6 and CYP2D6 with Ki of 0.51 nM and 94.9 ŒºM, respectively.	Neuronal Signaling
RL-0074781	AZD6482	Target Selective	Selleck	S1462	PI3K	AZD6482 is a PI3KŒ≤ inhibitor with IC50 of 10 nM, 8-, 87- and 109-fold more selective to PI3KŒ≤ than PI3KŒ¥, PI3KŒ± and PI3KŒ≥. Phase 1.	PI3K/Akt/mTOR
RL-0061983	Tadalafil	Target Selective	Selleck	S1512	PDE	Tadalafil is a PDE-5 inhibitor with IC50 of 1.8 nM.	Metabolism
RL-0069941	(2-iodo-5-nitrophenyl)-(1-(1-methylpiperidin-2-ylmethyl)-1H-indol-3-yl)methanone, AM1241	Target Selective	Selleck	S1544	Cannabinoid Receptor	AM-1241 is a selective cannabinoid CB2 receptor agonist with Ki of 3.4 nM, exhibits 82-fold selectivity over CB1 receptor.	GPCR & G Protein
RL-0074792	Tie2 kinase inhibitor	Target Selective	Selleck	S1577	Tie-2	Tie2 kinase inhibitor is an optimized compound of SB-203580, selective to Tie2 with IC50 of 0.25 ŒºM, 200-fold more potent than p38.	Protein Tyrosine Kinase
RL-0000101	Allopurinol	Target Selective	Selleck	S1630	OX Receptor	Allopurinol (Zyloprim) is a xanthine oxidase inhibitor with an IC50 of 7.82¬±0.12 ŒºM.	GPCR & G Protein
RL-0061967	ROXATIDINE ACETATE HCl	Target Selective	Selleck	S1880	Histamine Receptor	Roxatidine Acetate HCl is a specific and competitive histamin H2-receptor antagonist, with IC50 of 3.2 ŒºM, inhibits gastric acid secretion and ulcer formation.	Neuronal Signaling
RL-0069714	Raltegravir (MK-0518)	Target Selective	Selleck	S2005	Integrase	Raltegravir (MK-0518) is a potent integrase (IN) inhibitor for WT and S217Q PFV IN with IC50 of 90 nM and 40 nM, respectively.	Microbiology
RL-0000300	Captopril	Target Selective	Selleck	S2051	RAAS	Captopril is an angiotensin-converting enzyme (ACE) inhibitor with IC50 of 6 nM.	Endocrinology & Hormones
RL-0074782	Safinamide Mesylate	Target Selective	Selleck	S1472	MAO	Safinamide Mesylate is mesylate salt of Safinamide, selectively and reversibly inhibits MAO-B with IC50 of 98 nM, exhibits 5918-fold selectivity against MAO-A. Phase 3.	Metabolism
RL-0074611	MK-1775	Target Selective	Selleck	S1525	Wee1	MK-1775 is a potent and selective Wee1 inhibitor with IC50 of 5.2 nM; hinders G2 DNA damage checkpoint. Phase 2.	Cell Cycle
RL-0062985	N-(6 8-Difluoro-2-methyl-4-quinolinyl)-N -[4-(dimethylamino)phenyl]urea, SB 408124	Target Selective	Selleck	S1545	OX Receptor	SB408124 (Tocris-1963) is a non-peptide antagonist for OX1 receptor with Ki of 57 nM and27 nM in both whole cell and membrane, respectively, exhibits 50-fold selectivity over OX2 receptor.	GPCR & G Protein
RL-0062541	Candesartan	Target Selective	Selleck	S1578	RAAS	Candesartan is an angiotensin II receptor antagonist with IC50 of 0.26 nM.	Endocrinology & Hormones
RL-0062027	ENALAPRILAT, Enalaprilat dihydrate	Target Selective	Selleck	S1657	RAAS	Enalaprilat is an angiotensin-converting enzyme (ACE) inhibitor with IC50 of 1.94 nM.	Endocrinology & Hormones
RL-0000504	Felodipine	Target Selective	Selleck	S1885	Calcium Channel	Felodipine is a selective L-type Ca2+ channel blocker with IC50 of 0.15 nM.	Transmembrane Transporters
RL-0001480	PYRIMETHAMINE	Target Selective	Selleck	S2006	DHFR	Pyrimethamine is a dihydrofolate reductase(DHFR) inhibitor with an IC50 of 15.4 nM.	Metabolism
RL-0002051	LOVASTATIN	Target Selective	Selleck	S2061	HMG-CoA Reductase	Lovastatin is an inhibitor of HMG-CoA reductase with IC50 of 3.4 nM, used for lowering cholesterol (hypolipidemic agent).	Metabolism
RL-0070175	GSK429286A, RHO-15	Target Selective	Selleck	S1474	ROCK	GSK429286A is a selective inhibitor of ROCK1 and ROCK2 with IC50 of 14 nM and 63 nM, respectively.	Cell Cycle
RL-0070156	AC220 (Quizartinib, AC010220), Quizartinib (AC220)	Target Selective	Selleck	S1526	FLT3	Quizartinib (AC220) is a second-generation FLT3 inhibitor for Flt3(ITD/WT) with IC50 of 1.1 nM/4.2 nM, 10-fold more selective for Flt3 than KIT, PDGFRŒ±, PDGFRŒ≤, RET, and CSF-1R. Phase 1/2.	Angiogenesis
RL-0074787	Dapagliflozin	Target Selective	Selleck	S1548	SGLT	Dapagliflozin is a potent and selective hSGLT2 inhibitor with EC50 of 1.1 nM, exhibiting 1200-fold selectivity over hSGLT1. Phase 3.	GPCR & G Protein
RL-0074793	H 89 2HCl	Target Selective	Selleck	S1582	PKA	H 89 2HCl is a potent PKA inhibitor with Ki of 48 nM, 10-fold selective for PKA than PKG, greater than 500-fold selectivity than PKC, MLCK, calmodulin kinase II and casein kinase I/II.	PI3K/Akt/mTOR
RL-0001912	TELMISARTAN	Target Selective	Selleck	S1738	RAAS	Telmisartan (Micardis) is an angiotensin II receptor antagonist (ARB) used in the management of hypertension.	Endocrinology & Hormones
RL-0002642	2-[(2-Aminoethoxy)methyl]-4-(2-chlorophenyl)-1 4-dihydro-6-methyl-3 5-pyridinedicarboxylic acid 3-ethyl 5-methyl ester benzenesulfonate, AMLODIPINE BASE, AMLODIPINE BESYLATE, Amlodipine, RL-0072100	Target Selective	Selleck	S1905	Calcium Channel	Amlodipine(Norvasc) is a long-acting calcium channel blocker with an IC50 of 1.9 nM.	Transmembrane Transporters
RL-0074798	PF-573228	Target Selective	Selleck	S2013	FAK	PF-573228 is an ATP-competitive inhibitor of FAK with IC50 of 4 nM, ~50- to 250-fold selective for FAK than Pyk2, CDK1/7 and GSK-3Œ≤.	Angiogenesis
RL-0074799	Lafutidine	Target Selective	Selleck	S2065	Histamine Receptor	Lafutidine, a newly developed histamine H(2)-receptor antagonist, inhibits gastric acid secretion.	Neuronal Signaling
RL-0074783	Oligomycin A	Target Selective	Selleck	S1478	ATPase	Oligomycin A is an inhibitor of ATP synthase, inhibits oxidative phosphorylation and all the ATP-dependent processes occurring on the coupling membrane of mitochondria.	Transmembrane Transporters
RL-0070043	AZD 7762	Target Selective	Selleck	S1532	Chk	AZD7762 is a potent and selective inhibitor of Chk1 with IC50 of 5 nM. It is equally potent against Chk2 and less potent against CAM, Yes, Fyn, Lyn, Hck and Lck. Phase 1.	Cell Cycle
RL-0074788	Nebivolol	Target Selective	Selleck	S1549	Adrenergic Receptor	Nebivolol selectively inhibits Œ≤1-adrenoceptor with IC50 of 0.8 nM.	Neuronal Signaling
RL-0062703	TWS119	Target Selective	Selleck	S1590	GSK-3	TWS119 is a GSK-3Œ≤ inhibitor with IC50 of 30 nM; capable of inducing neuronal differentiation and may be useful to stem cell biology.	PI3K/Akt/mTOR
RL-0062069	TOREMIPHENE CITRATE, Toremifene, Toremifene citrate	Target Selective	Selleck	S1776	Estrogen/progestogen Receptor	Toremifene Citrate is an oral selective estrogen receptor modulator (SERM) which helps oppose the actions of estrogen in the body.	Endocrinology & Hormones
RL-0074796	Fluvastatin Sodium	Target Selective	Selleck	S1909	HMG-CoA Reductase	Fluvastatin Sodium inhibits HMG-CoA reductase activity with IC50 of 8 nM.	Metabolism
RL-0000494	FORMOTEROL FUMARATE, Formoterol, Formoterol fumarate dihydrate, Formoterol hemifumarate	Target Selective	Selleck	S2020	Adrenergic Receptor	Formoterol hemifumarate is a potent, selective and long-acting Œ≤2-adrenoceptor agonist to Œ≤2 and Œ≤1 receptors with pKd of 8.12 and 5.58, respectively.	Neuronal Signaling
RL-0074800	Ozagrel HCl	Target Selective	Selleck	S2067	Others	Ozagrel HCl is a selective thromboxane A2 synthetase enzyme inhibitors with IC50 of 11 nM, used as antiasthmatic agent.	Others
RL-0071479	Tubacin	Target Selective	Selleck	S2239	HDAC	Tubacin is a highly potent and selective, reversible, cell-permeable HDAC6 inhibitor with an IC50 of 4 nM, approximately 350-fold selectivity over HDAC1.	Cytoskeletal Signaling
RL-0061964	Pramipexole, Pramipexole hydrochloride	Target Selective	Selleck	S2460	Dopamine Receptor	Pramipexole is a partial/full D2S, D2L, D3, D4 receptor agonist with a Ki of 3.9, 2.2, 0.5 and 5.1 nM for D2S, D2L, D3, D4 receptor, respectively.	Neuronal Signaling
RL-0001755	TIOXOLONE	Target Selective	Selleck	S2603	Carbonic Anhydrase	Tioxolone is a metalloenzyme carbonic anhydrase I inhibitor with a Ki of 91 nM.	Metabolism
RL-0074347	DCC-2036 (Rebastinib)	Target Selective	Selleck	S2634	Bcr-Abl	DCC-2036 is a conformational control Bcr-Abl inhibitor for Abl1(WT) and Abl1(T315I) with IC50 of 0.8 nM and 4 nM, also inhibits SRC, LYN, FGR, HCK, KDR, FLT3, and Tie-2, and low activity to seen towards c-Kit. Phase 1/2.	Angiogenesis
RL-0074828	CHIR-124	Target Selective	Selleck	S2683	Chk	CHIR-124 is a novel and potent Chk1 inhibitor with IC50 of 0.3 nM. It shows 2,000-fold selectivity against Chk2, 500- to 5,000-fold less activity against CDK2/4 and Cdc2.	Cell Cycle
RL-0074701	Nilvadipine	Target Selective	Selleck	S2721	Calcium Channel	Nilvadipine is a potent calcium channel blocker with an IC50 of 0.03 nM.	Transmembrane Transporters
RL-0074838	SB705498	Target Selective	Selleck	S2773	TRPV	SB705498 is a TRPV1 antagonist for hTRPV1, antagonizes capsaicin, acid, and heat activation of TRPV1 with IC50 of 3 nM, 0.1 nM and 6 nM, shows a degree of voltage dependence, exhibits >100-fold selectivity for TRPV1 over TRPM8. Phase 2.	Others
RL-0074843	VU 0357121	Target Selective	Selleck	S2795	GluR	VU0357121 is a novel positive allosteric modulator (PAM) of mGlu5 with EC50 of 33 nM, is inactive or very weakly antagonizing at other mGlu receptor subtypes.	Neuronal Signaling
RL-0000064	Apigenin	Target Selective	Selleck	S2262	P450 (e.g. CYP17)	Apigenin is a potent P450 inhibitor for CYP2C9 with IC50 of 23 pM.	Metabolism
RL-0061455	Gleevec (Imatinib), Gleevec (Imatinib) mesylate, Imatinib (Gleevec), Imatinib (STI571), Imatinib Mesylate	Target Selective	Selleck	S2475	PDGFR	Imatinib is a multi-target inhibitor of v-Abl, c-Kit and PDGFR with IC50 of 0.6 ŒºM, 0.1 ŒºM and 0.1 ŒºM, respectively.	Protein Tyrosine Kinase
RL-0074356	Fostamatinib (R788), R935788 (Fostamatinib disodium)	Target Selective	Selleck	S2625	Syk	Fostamatinib (R788), a prodrug of the active metabolite R406, is a Syk inhibitor with IC50 of 41 nM, strongly inhibits Syk but not Lyn, 5-fold less potent to Flt3. Phase 2.	Angiogenesis
RL-0074368	CCT128930	Target Selective	Selleck	S2635	Akt	CCT128930 is a potent, ATP-competitive and selective inhibitor of Akt2 with IC50 of 6 nM, 28-fold greater selectivity for Akt2 than the closely related PKA kinase.	PI3K/Akt/mTOR
RL-0074829	ADX-47273	Target Selective	Selleck	S2690	GluR	ADX47273 is a potent and specific mGlu5 positive allosteric modulator(PAM) with EC50 of 0.17 ŒºM, showing no activity at other mGlu subtypes.	Neuronal Signaling
RL-0000477	SB-415286	Target Selective	Selleck	S2729	GSK-3	SB415286 is a potent GSK3Œ± inhibitor with IC50/Ki of 78 nM/31 nM with equally effective inhibition of GSK-3Œ≤.	PI3K/Akt/mTOR
RL-0074839	PF-5274857	Target Selective	Selleck	S2777	Hedgehog/Smoothened	PF-5274857 is a potent and selective Smoothened (Smo) antagonist, inhibits Hedgehog (Hh) signaling with IC50 and Ki of 5.8 nM and 4.6 nM, respectively, and can penetrate the blood‚Äìbrain barrier.	Stem Cells & Wnt
RL-0074595	AZD4547	Target Selective	Selleck	S2801	FGFR	AZD4547 is a novel selective FGFR inhibitor targeting FGFR1/2/3 with IC50 of 0.2 nM/2.5 nM/1.8 nM, weaker activity against FGFR4, VEGFR2(KDR), and little activity observed against IGFR, CDK2, and p38. Phase 1/2.	Angiogenesis
RL-0002377	BERGENIN	Target Selective	Selleck	S2270	Others	Bergenin is trihydroxybenzoic acid glycoside and the C-glycoside of 4-O-methyl gallic acid.	Others
RL-0074819	Oxymetazoline HCl	Target Selective	Selleck	S2495	Adrenergic Receptor	Oxymetazoline hydrochloride is an Œ±1 and Œ±2 adrenergic receptor agonist.	Neuronal Signaling
RL-0073962	LY2603618, LY2603618 (IC-83), S)-1-(5-bromo-4-methyl-2-(morpholin-2-ylmethoxy)phenyl)-3-(5-methylpyrazin-2-yl)urea	Target Selective	Selleck	S2626	Chk	LY2603618 is a selective Chk1 inhibitor with potential anti-tumor activity.	Cell Cycle
RL-0074983	TAK-875	Target Selective	Selleck	S2637	GPR	TAK-875 is a selective GPR40 agonist with EC50 of 14 nM, 400-fold more potent than oleic acid.	Endocrinology & Hormones
RL-0074830	XL335	Target Selective	Selleck	S2694	FXR	XL335 is a potent, selective FXR agonist with EC50 of 4 nM, highly selective versus other nuclear receptors, such as LXR, PPAR, ER and etc. Phase 1.	Others
RL-0074381	Crenolanib (CP-868596)	Target Selective	Selleck	S2730	PDGFR	Crenolanib (CP-868596) is a potent and selective inhibitor of PDGFRŒ±/Œ≤ with Kd of 2.1 nM/3.2 nM, also potently inhibits FLT3, sensitive to D842V mutation not V561D mutation, >100-fold more selective for PDGFR than c-Kit, VEGFR-2, TIE-2, FGFR-2, EGFR, erbB2, and Src.	Protein Tyrosine Kinase
RL-0074205	I-BET 151 hydrochloride, I-BET151 (GSK1210151A)	Target Selective	Selleck	S2780	Epigenetic Reader Domain	I-BET151 (GSK1210151A) is a novel selective BET inhibitor for BRD2, BRD3 and BRD4 with IC50 of 0.5 ŒºM, 0.25 ŒºM, and 0.79 ŒºM, respectively.	Epigenetics
RL-0062166	2-[(2-Hydroxynaphthalen-1-ylmethylene)amino]-N-(1-phenethyl)benzamide, Sirtinol	Target Selective	Selleck	S2804	Sirtuin	Sirtinol is a specific SIRT1 and SIRT2 inhibitor with IC50 of 131 ŒºM and 38 ŒºM, respectively.	Epigenetics
RL-0002504	CRYPTOTANSHINONE	Target Selective	Selleck	S2285	STAT	Cryptotanshinone (CPT) is a STAT3 inhibitor with IC50 of 4.6 √Ø_M, strongly inhibits phosphorylation of STAT3 Tyr705, with a small effect on STAT3 Ser727, but none against STAT1 nor STAT5.	JAK/STAT
RL-0003393	Ozagrel, Ozagrel hydrochloride	Target Selective	Selleck	S2496	Factor Xa	Ozagrel is a potent and selective thromboxane A2 synthetase inhibitor with an IC50 of 4 nM.	Metabolism
RL-0063137	N-(5-Chloro-2 4-dimethoxyphenyl)-N -(5-methyl-3-isoxazolyl)-urea, PNU 120596	Target Selective	Selleck	S2629	AChR	PNU-120596 is a positive allosteric modulator of Œ±7 nAChR with EC50 of 216 nM.	Neuronal Signaling
RL-0074825	5-hydroxymethyl Tolterodine (PNU 200577, 5-HMT, 5-HM)	Target Selective	Selleck	S2659	AChR	5-hydroxymethyl tolterodine (PNU 200577) is a new muscarinic receptor antagonist with Kb of 0.84 nM.	Neuronal Signaling
RL-0070075	A 769662	Target Selective	Selleck	S2697	AMPK	A-769662 is a potent, reversible AMPK activator with EC50of 0.8 ŒºM, little effect on GPPase/FBPase activity.	PI3K/Akt/mTOR
RL-0074834	AZ 3146	Target Selective	Selleck	S2731	Kinesin	AZ3146 is a selective Mps1 inhibitor with IC50 of ~35 nM, contributes to recruitment of CENP-E (kinesin-related motor protein), less potent to FAK, JNK1, JNK2, and Kit.	Cytoskeletal Signaling
RL-0063124	3-[2-[2-Chloro-4-[[3-(2 6-dichlorophenyl)-5-(1-methylethyl)-4-isoxazolyl]methoxy]phenyl]ethenyl]benzoic acid, GW 4064	Target Selective	Selleck	S2782	FXR	GW4064 is an agonist of farnesoid X receptor (FXR) with EC50 of 65 nM.	Others
RL-0074601	Dabrafenib (GSK2118436), Dabrafenib (GSK2118436A), Dabrafenib Mesylate (GSK2118436B)	Target Selective	Selleck	S2807	Raf	Dabrafenib (GSK2118436) is a mutant BRAFV600 specific inhibitor with IC50 of 0.8 nM, with 4- and 6-fold less potency against B-Raf(wt) and c-Raf, respectively. Phase 3.	MAPK
RL-0074815	(-)-Parthenolide	Target Selective	Selleck	S2341	E3 Ligase	(-)-Parthenolide is a sesquiterpene lactone which occurs naturally in the plant feverfew(Tanacetum parthenium) and also promotes the ubiquitination of MDM2 and activates p53 cellular functions.	Ubiquitin
RL-0074820	Pancuronium dibromide	Target Selective	Selleck	S2497	AChR	Pancuronium dibromide is a competitive acetylcholine antagonist with an IC50 of 5.5 ¬± 0.5 nM.	Neuronal Signaling
RL-0074822	GW3965 HCl	Target Selective	Selleck	S2630	Liver X Receptor	GW3965 is a potent, selective LXRagonist for hLXRŒ± and hLXRŒ≤ with EC50 of 190 and 30 nM, respectively.	Others
RL-0074826	ICG-001	Target Selective	Selleck	S2662	Wnt/beta-catenin	ICG-001 antagonizes Wnt/Œ≤-catenin/TCF-mediated transcription and specifically binds to element-binding protein (CBP) with IC50 of 3 ŒºM, but is not the related transcriptional coactivator p300.	Stem Cells & Wnt
RL-0074375	KX2-391	Target Selective	Selleck	S2700	Src	KX2-391 (KX01), the first clinical Src inhibitor (peptidomimetic class) that targets the peptide substrate site of Src, with GI50 of 9-60 nM in cancer cell lines. Phase 1/2.	Angiogenesis
RL-0063162	4-(Phenylmethyl)-1-piperazineacetic acid [[2-hydroxy-3-(2-propenyl)phenyl]methylene]hydrazide, PAC-1	Target Selective	Selleck	S2738	Caspase	PAC-1 is a potent procaspase-3 activator with EC50 of 0.22 √Ø_M and the first small molecule known to directly activate procaspase-3 to caspase-3.	Apoptosis
RL-0074840	Tofacitinib (CP-690550,Tasocitinib)	Target Selective	Selleck	S2789	JAK	Tofacitinib is a novel inhibitor of JAK3 with IC50 of 1 nM, 20- to 100-fold less potent against JAK2 and JAK1.	JAK/STAT
RL-0074844	GDC-0068	Target Selective	Selleck	S2808	Akt	GDC-0068 is a highly selective pan-Akt inhibitor targeting Akt1/2/3 with IC50 of 5 nM/18 nM/8 nM, 620-fold selectivity over PKA. Phase 2.	PI3K/Akt/mTOR
RL-0074816	Rotundine	Target Selective	Selleck	S2437	Dopamine Receptor	Rotundine (L-tetrahydropalmatine, L-THP) is a selective dopamine D1 receptor antagonist with IC50 of 166 nM.	Neuronal Signaling
RL-0074982	Trospium chloride	Target Selective	Selleck	S2549	AChR	Trospium chloride (Sanctura) is a competitive muscarinic cholinergic receptor antagonist.	Neuronal Signaling
RL-0063418	URB-597	Target Selective	Selleck	S2631	FAAH	URB597 is a potent, orally bioavailable FAAH inhibitor with IC50 of 4.6 nM, with no activity on other cannabinoid-related targets.	Metabolism
RL-0074827	PF-3845	Target Selective	Selleck	S2666	FAAH	PF-3845 is a potent, selective and irreversible FAAH inhibitor with Ki of 230 nM, showing negligible activity against FAAH2.	Metabolism
RL-0074831	YO-01027	Target Selective	Selleck	S2711	Gamma-secretase	YO-01027 (Dibenzazepine, DBZ) is a dipeptidic Œ≥-secretase inhibitor with IC50 of 2.6 nM and 2.9 nM for APPL and Notch cleavage, respectively.	Proteases
RL-0074835	Anacetrapib (MK-0859)	Target Selective	Selleck	S2748	CETP	Anacetrapib (MK0859) is a potent, selective, reversible rhCETP and mutant CETP(C13S) inhibitor with IC50 of 7.9 nM and 11.8 nM, increases HDL-C and decreases LDL-C, does not increase aldosterone or blood pressure. Phase 3.	Metabolism
RL-0074841	Istradefylline	Target Selective	Selleck	S2790	Others	Istradefylline is a selective adenosine A2A receptor (A2AR) antagonist with Ki of 2.2 nM.	Others
RL-0002056	AT 101, GOSSYPOL	Target Selective	Selleck	S2812	Bcl-2	AT101, the R-(-) enantiomer of Gossypol acetic acid, binds with Bcl-2, Bcl-xL and Mcl-1 with Ki of 0.32 √Ø_M, 0.48 √Ø_M and 0.18 √Ø_M; does not inhibit BIR3 domain and BID. Phase 1/2.	Apoptosis
RL-0074856	HC-030031	Target Selective	Selleck	S2918	Others	HC-030031 is a selective TRPA1 channel blocker that antagonizes AITC- and formalin-evoked calcium influx with IC50 of 6.2 ŒºM and 5.3 ŒºM respectively.	Others
RL-0074501	Linagliptin	Target Selective	Selleck	S3031	DPP-4	Linagliptin is a highly potent, selective DPP-4 inhibitor with IC50 of 1 nM.	Proteases
RL-0061990	MOCLOBEMIDE, Moclobemide (Ro 111163)	Target Selective	Selleck	S3212	MAO	Moclobemide is MAO-A (5-HT) inhibitor with IC50 of 6.1 ŒºM.	Metabolism
RL-0074986	Ifenprodil Tartrate_Selleck	Target Selective	Selleck	S4091	GluR	Ifenprodil is an atypical noncompetitive antagonist at the NMDA receptor, it interacts with high affinity at a homogeneous population of NMDA receptors in neonatal rat forebrain with IC50 of 0.3 ‚Ä∞√õ√∑_M.	Neuronal Signaling
RL-0061348	SC-514	Target Selective	Selleck	S4907	IŒ∫B/IKK	SC-514 is an orally active, ATP-competitive IKK-2 inhibitor with IC50 of 3-12 ŒºM, blocks NF-Œ∫B-dependent gene expression, does not inhibit other IKK isoforms or other serine-threonine and tyrosine kinases.	NF-Œ∫B
RL-0074877	GDC-0152	Target Selective	Selleck	S7010	IAP	GDC-0152 is a potent antagonist of XIAP-BIR3, ML-IAP-BIR3, cIAP1-BIR3 and cIAP2-BIR3 with Ki of 28 nM, 14 nM, 17 nM and 43 nM, respectively; less affinity shown to cIAP1-BIR2 and cIAP2-BIR2. Phase 1.	Apoptosis
RL-0074882	AZ20	Target Selective	Selleck	S7050	ATM/ATR	AZ20 is a novel potent and selective inhibitor of ATR kinase with IC50 of 5 nM, 8-fold selectivity over mTOR.	PI3K/Akt/mTOR
RL-0062501	N-[(3,5-dimethyl-1-phenyl-1H-pyrazol-4-yl)methylene]-4- (phenylmethyl)-1-piperazinamine, SANT-1	Target Selective	Selleck	S7092	Hedgehog/Smoothened	SANT-1 directly binds to Smoothened (Smo) receptor with Kd of 1.2 nM and inhibits Smo agonist effects with IC50 of 20 nM.	Stem Cells & Wnt
RL-0074857	IOX2	Target Selective	Selleck	S2919	HIF	IOX2 is a potent inhibitor of HIF-1Œ± prolyl hydroxylase-2 (PHD2) with IC50 of 21 nM, >100-fold selectivity over JMJD2A, JMJD2C, JMJD2E, JMJD3, or the 2OG oxygenase FIH.	Angiogenesis
RL-0074860	Vildagliptin (LAF-237)	Target Selective	Selleck	S3033	DPP-4	Vildagliptin (LAF-237) inhibits DPP‚àí4 with IC50 of 2.3 nM.	Proteases
RL-0074863	Mirabegron	Target Selective	Selleck	S4009	Adrenergic Receptor	Mirabegron is a selective Œ≤3-adrenoceptor agonist with EC50 of 22.4 nM.	Neuronal Signaling
RL-0074867	Tolazoline HCl	Target Selective	Selleck	S4124	Adrenergic Receptor	Tolazoline is a non-selective competitive Œ±-adrenergic receptor antagonist.	Neuronal Signaling
RL-0074873	SN-38	Target Selective	Selleck	S4908	Topoisomerase	SN-38 is an active metabolite of CPT-11, inhibits DNA topoisomerase I, DNA synthesis and causes frequent DNA single-strand breaks.	DNA Damage
RL-0074596	Birinapant, Birinapant (TL-32711)	Target Selective	Selleck	S7015	IAP	Birinapant is a SMAC mimetic antagonist, mostly to cIAP1 with Kd of <1 nM, less potent to XIAP. Phase 1/2.	Apoptosis
RL-0074883	CGI1746	Target Selective	Selleck	S7051	BTK	CGI1746 is a potent and highly selective small-molecule inhibitor of the Btk with IC50 of 1.9 nM.	Angiogenesis
RL-0070761	1-1-Dithiodi-2-naphthtol, IPA-3	Target Selective	Selleck	S7093	PAK	IPA-3 is a selective non-ATP competitive Pak1 inhibitor with IC50 of 2.5 ŒºM, no inhibition to group II PAKs (PAKs 4-6).	Cytoskeletal Signaling
RL-0074858	Icotinib	Target Selective	Selleck	S2922	EGFR	Icotinib is a potent and specific EGFR inhibitor with IC50 of 5 nM, including the EGFR, EGFR(L858R), EGFR(L861Q), EGFR(T790M) and EGFR(T790M, L858R). Phase 4.	Protein Tyrosine Kinase
RL-0074861	Sitaxentan sodium	Target Selective	Selleck	S3034	Endothelin Receptor	Sitaxentan sodium is a selective endothelin A receptor (ETA) antagonist with IC50 and Ki of 1.4 nM and 0.43 nM, respectively, exhibits 7000-fold selectivity over ETB. Phase 3.	GPCR & G Protein
RL-0000937	Ouabain, Strophantine octahydrate	Target Selective	Selleck	S4016	Sodium Channel	Ouabain is a selective Na+/K+, -ATPase inhibitor, binds to √Ø¬±2 /√Ø¬±3 subunit with Ki of 41 nM/15 nM.	Transmembrane Transporters
RL-0074868	Tranylcypromine (2-PCPA) HCl	Target Selective	Selleck	S4246	Histone demethylases	Tranylcypromine is a monoamine oxidase inhibitor, which inhibits CYP2A6 with Ki of 0.08 ŒºM and 0.2 ŒºM in cDNA-expressing microsomes and Human Liver Microsomes, respectively.	Epigenetics
RL-0074874	MNS (3,4-Methylenedioxy-Œ≤-nitrostyrene, MDBN)	Target Selective	Selleck	S4921	p97	MNS is a tyrosine kinases inhibitor, inhibits Syk, Src, p97 with IC50 of 2.5 ŒºM, 29.3 ŒºM and 1.7 ŒºM, respectively.	Ubiquitin
RL-0074878	VS-5584 (SB2343)	Target Selective	Selleck	S7016	PI3K	VS-5584 (SB2343) is a potent and selective dual PI3K/mTOR inhibitor for mTOR, PI3KŒ±/Œ≤/Œ¥/Œ≥ with IC50 of 3.4 nM and 2.6-21 nM, respectively. Phase 1.	PI3K/Akt/mTOR
RL-0074884	GSK J4 HCl	Target Selective	Selleck	S7070	Histone demethylases	GSK J4 HCl is a cell permeable prodrug of GSK J1, which is the first selective inhibitor of the H3K27 histone demethylase JMJD3 and UTX with IC50 of 60 nM and inactive against a panel of demethylases of the JMJ family.	Epigenetics
RL-0074887	HSP990 (NVP-HSP990)	Target Selective	Selleck	S7097	HSP (e.g. HSP90)	NVP-HSP990 (HSP990) is a novel, potent and selective HSP90 inhibitor for HSP90Œ±/Œ≤ with IC50 of 0.6 nM/0.8 nM.	Cytoskeletal Signaling
RL-0063020	1-[(3 4-Dichlorophenyl)methyl]-1H-indole-2 3-dione, Apoptosis Activator 2	Target Selective	Selleck	S2927	Caspase	Apoptosis Activator 2 strongly induces caspase-3 activation, PARP cleavage, and DNA fragmentation which leads to the destruction of cells (Apaf-1 dependent) with IC50 of ~4 ŒºM, inactive to HMEC, PREC, or MCF-10A cells.	Apoptosis
RL-0074862	Daunorubicin HCl	Target Selective	Selleck	S3035	Telomerase	Daunorubicin HCl inhibits both DNA and RNA synthesis and inhibits DNA synthesis with Ki of 0.02 ŒºM.	DNA Damage
RL-0000862	SERTRALINE HCl, Sertraline hydrochloride	Target Selective	Selleck	S4053	5-HT Receptor	Sertraline HCl is a 5-HT antagonist with Ki of 13 nM.	Neuronal Signaling
RL-0074869	EUK 134	Target Selective	Selleck	S4261	Beta Amyloid	EUK 134, a synthetic superoxide dismutase (SOD)/catalase mimetic, exhibits potent antioxidant activities, and inhibits the formation of Œ≤-amyloid and related amyloid fibril.	Neuronal Signaling
RL-0074875	(R)-Nepicastat HCl	Target Selective	Selleck	S4926	Hydroxylase	(R)-Nepicastat HCl, the R-enantiomer of Nepicastat HCl, is a potent and selective inhibitor with IC50 of 25.1 nM and 18.3 nM for bovine and human dopamine-Œ≤-hydroxylase, with negligible affinity for twelve other enzymes and thirteen neurotransmitter receptors.	Metabolism
RL-0062697	6-Nitrobenzo[b]thiophene 1,1-dioxide, Stattic	Target Selective	Selleck	S7024	STAT	Stattic, the first nonpeptidic small molecule, potently inhibits STAT3 activation and nuclear translocation with IC50 of 5.1 ŒºM, highly selectivity over STAT1.	JAK/STAT
RL-0003139	(+)-Bicuculline, Bicuculline (+)	Target Selective	Selleck	S7071	GABA Receptor	(+)-Bicuculline is a competitive antagonist of GABAA receptors with IC50 of 2 ŒºM, also blocks Ca(2+)-activated potassium channels.	Neuronal Signaling
RL-0074888	VE-822	Target Selective	Selleck	S7102	ATM/ATR	VE-822 is an ATR inhibitor with IC50 of 19 nM.	PI3K/Akt/mTOR
RL-0063179	2-Phenylethynesulfonamide, Pifithrin-mu, Pifithrin-Œº	Target Selective	Selleck	S2930	p53	Pifithrin-Œº is a specific p53 inhibitor by reducing its affinity to Bcl-xL and Bcl-2, and also inhibits HSP70 function and autophagy.	Apoptosis
RL-0074984	Bosentan Hydrate	Target Selective	Selleck	S3051	Endothelin Receptor	Bosentan is an endothelin (ET) receptors antagonist for ET-A and ET-B with Ki of 4.7 nM and 95 nM, respectively.	GPCR & G Protein
RL-0074864	Sodium 4-Aminosalicylate	Target Selective	Selleck	S4073	NF-Œ∫B	Sodium 4-Aminosalicylate is an antibiotic used to treat tuberculosis via NF-Œ∫B inhibition and free radical scavenging.	NF-Œ∫B
RL-0074870	Ospemifene	Target Selective	Selleck	S4285	Estrogen/progestogen	Ospemifene is a non-hormonal selective estrogen receptor modulator (SERM), used for the treatment of dyspareunia.	Endocrinology & Hormones
RL-0074876	Fingolimod (FTY720) HCl	Target Selective	Selleck	S5002	S1P Receptor	Fingolimod (FTY720) is a S1P antagonist with IC50 of 0.033 nM.	GPCR & G Protein
RL-0001854	EMBELIN	Target Selective	Selleck	S7025	IAP	Embelin, a quinone isolated from the Japanese Ardisia herb, is an inhibitor of X-linked inhibitor of apoptosis (XIAP) with IC50 of 4.1 &mu;M.	Apoptosis
RL-0063092	N-(2 2 2-Trifluoroethyl)-N-[4-[2 2 2-trifluoro-1-hydroxy-1-(trifluoromethyl)ethyl]phenyl]benzenesulfonamide, T 0901317	Target Selective	Selleck	S7076	Liver X Receptor	T0901317 is a potent and selective agonist for both LXR and FXR, with EC50 of ~50 nM and 5 ŒºM, respectively.	Others
RL-0074594	AZD-3463	Target Selective	Selleck	S7106	ALK	AZD3463 is a novel orally bioavailable ALK inhibitor with Ki of 0.75 nM, which also inhibits IGF1R with equivalent potency.	Protein Tyrosine Kinase
RL-0074859	Rivaroxaban	Target Selective	Selleck	S3002	Factor Xa	Rivaroxaban is a direct inhibitor of Factor Xa with Ki and IC50 of 0.4 nM and 0.7 nM, respectively.	Metabolism
RL-0062545	Entacapone	Target Selective	Selleck	S3147	Histone Methyltransferase	Entacapone inhibits catechol-O-methyltransferase(COMT) with IC50 of 151 nM.	Epigenetics
RL-0074865	Propranolol HCl	Target Selective	Selleck	S4076	Adrenergic Receptor	Propranolol HCl is a competitive non-selective beta-adrenergic receptors inhibitor with IC50 of 12 nM.	GPCR & G Protein
RL-0074871	MetoclopraMide HCl	Target Selective	Selleck	S4289	Dopamine Receptor	MetoclopraMide HCl is a selective dopamine D2 receptor antagonist, used for the treatment of nausea and vomiting.	Neuronal Signaling
RL-0069846	Ataluren (PTC124), PTC124 (Ataluren)	Target Selective	Selleck	S6003	CFTR	PTC124 (Ataluren) selectively induces ribosomal read-through of premature but not normal termination codons, with EC50 of 0.1 ŒºM, may provide treatment for genetic disorders caused by nonsense mutations (e.g. CF caused by CFTR nonsense mutation). Phase 3.	Transmembrane Transporters
RL-0074879	AZD2461	Target Selective	Selleck	S7029	PARP	AZD2461 is a novel PARP inhibitor with low affinity for Pgp than Olaparib. Phase 1.	DNA Damage
RL-0074885	SGC 0946	Target Selective	Selleck	S7079	Histone Methyltransferase	SGC 0946 is a highly potent and selective DOT1L methyltransferase inhibitor with IC50 of 0.3 nM, is inactive against a panel of 12 PMTs and DNMT1.	Epigenetics
RL-0074249	(+)-JQ1, (-)-JQ1, RL-0074588	Target Selective	Selleck	S7110	Epigenetic Reader Domain	(+)-JQ1 is a BET bromodomain inhibitor, with IC50 of 77 nM/33 nM for BRD4(1/2), binding to all bromodomains of the BET family, but not to bromodomains outside the BET family.	Epigenetics
RL-0069741	ABT-263, ABT-263 (Navitoclax)	Target Selective	Selleck	S1001	Bcl-2	ABT-263 (Navitoclax) is a potent inhibitor of Bcl-xL, Bcl-2 and Bcl-w with Ki of ‚â§ 0.5 nM, ‚â§1 nM and ‚â§1 nM, but binds more weakly to Mcl-1 and A1. Phase 1/2.	Apoptosis
RL-0074742	Veliparib (ABT-888)	Target Selective	Selleck	S1004	PARP	Veliparib (ABT-888) is a potent inhibitor of PARP1 and PARP2 with Ki of 5.2 nM and 2.9 nM, respectively. It is inactive to SIRT2. Phase 1/2.	DNA Damage
RL-0074743	FG-4592	Target Selective	Selleck	S1007	HIF	FG-4592 is an HIF Œ± prolyl hydroxylase inhibitor, stabilizes HIF-2 and induces EPO production. Phase 2/3.	Angiogenesis
RL-0069701	AZD 6244 (ARRY-142886), AZD6244 (ARRY-142886 Selumetinib), AZD6244 (Selumetinib), Selumetinib (AZD6244)	Target Selective	Selleck	S1008	MEK	Selumetinib (AZD6244) is a potent, highly selective MEK1 inhibitor with IC50 of 14 nM, also inhibits ERK1/2 phosphorylation with IC50 of 10 nM, no inhibition to p38Œ±, MKK6, EGFR, ErbB2, ERK2, B-Raf, etc. Phase 1/2.	MAPK
RL-0074744	Bortezomib (PS-341)	Target Selective	Selleck	S1013	Proteasome	Bortezomib (PS-341) is a potent 20S proteasome inhibitor with Ki of 0.6 nM.	Proteases
RL-0070046	Bosutinib (SKI 606)	Target Selective	Selleck	S1014	Src	Bosutinib (SKI-606) is a novel, dual Src/Abl inhibitor with IC50 of 1.2 nM and 1 nM, respectively.	Angiogenesis
RL-0061453	CI-1040 (PD184352), PD-184352, PD184352 (CI-1040)	Target Selective	Selleck	S1020	MEK	CI-1040 (PD 184352) is an ATP non-competitive MEK1/2 inhibitor with IC50 of 17 nM, 100-fold more selective for MEK1/2 than MEK5. Phase 2.	MAPK
RL-0074745	Ridaforolimus (Deforolimus, MK-8669)	Target Selective	Selleck	S1022	mTOR	Ridaforolimus (Deforolimus) is a selective mTOR inhibitor with IC50 of 0.2 nM; while not classified as a prodrug, mTOR inhibition and FKBP12 binding is similar to rapamycin.	PI3K/Akt/mTOR
RL-0069747	Lenalidomide, Lenalidomide (CC-5013)	Target Selective	Selleck	S1029	TNF-alpha	Lenalidomide (CC-5013) is a TNF-Œ± secretion inhibitor with IC50 of 13 nM.	Apoptosis
RL-0074746	Panobinostat (LBH589)	Target Selective	Selleck	S1030	HDAC	Panobinostat (LBH589) is a novel broad-spectrum HDAC inhibitor with IC50 of 5 nM. Phase 3.	Epigenetics
RL-0070042	Nilotinib (AMN 107 or Tasigna), Nilotinib (AMN-107)	Target Selective	Selleck	S1033	Bcr-Abl	Nilotinib (AMN-107) is a Bcr-Abl inhibitor with IC50 less than 30 nM.	Angiogenesis
RL-0062346	PD0325901, RL-0074320	Target Selective	Selleck	S1036	MEK	PD0325901 (PD325901) is selective and non ATP-competitive MEK inhibitor with IC50 of 0.33 nM, roughly 500-fold more potent than CI-1040 on phosphorylation of ERK1 and ERK2. Phase 1/2.	MAPK
RL-0070050	Tandutinib (CT 53518 MLN 518), Tandutinib (MLN518)	Target Selective	Selleck	S1043	FLT3	Tandutinib (MLN518, CT53518) is a potent FLT3 antagonist with IC50 of 0.22 ŒºM, also inhibits PDGFR and c-Kit, 15 to 20-fold higher potency for FLT3 versus CSF-1R and >100-fold selectivity for the same target versus FGFR, EGFR and KDR. Phase 1/2.	Angiogenesis
RL-0074747	Temsirolimus (CCI-779, NSC 683864)	Target Selective	Selleck	S1044	mTOR	Temsirolimus (CCI-779) is a specific mTOR inhibitor with IC50 of 1.76 ŒºM.	PI3K/Akt/mTOR
RL-0074748	Trichostatin A (TSA)	Target Selective	Selleck	S1045	HDAC	Trichostatin A (TSA) is an HDAC inhibitor with IC50 of ~1.8 nM ‚Äì HDAC8 is the only known member of the HDAC-family that is not affected by TSA. Phase 3.	Epigenetics
RL-0070048	Vandetanib (ZD 6474), Vandetanib (Zactima)	Target Selective	Selleck	S1046	VEGFR	Vandetanib (ZD6474) is a potent inhibitor of VEGFR2 with IC50 of 40 nM.	Protein Tyrosine Kinase
RL-0000113	Aniracetam	Target Selective	Selleck	S1281	AMPA Receptor-kainate Receptor-NMDA Receptor	Aniracetam is a nootropics and neuroprotective drug.	Neuronal Signaling
RL-0074771	Ki16425	Target Selective	Selleck	S1315	LPA Receptor	Ki16425 is a competitive, potent and reversible antagonist to LPA1, LPA2 and LPA3 with Ki of 0.34 ŒºM, 6.5 ŒºM and 0.93 ŒºM, respectively, shows no activity at LPA4, LPA5, LPA6.	GPCR & G Protein
RL-0063130	(3aS 6E 10E 11aR)-3a 4 5 8 9 11a-Hexahydro-6 10-dimethyl-3-methylene-cyclodeca[b]furan-2(3H)-one, Costunolide	Target Selective	Selleck	S1319	Telomerase	Costunolide, a natural sesquiterpene compound with multiple biological activities; inhibits FPTase with IC50 of 20 √Ø_M, also inhibits telomerase with IC50 of 65-90 √Ø_M.	DNA Damage
RL-0000471	Doxazosin mesylate	Target Selective	Selleck	S1324	Adrenergic Receptor	Doxazosin mesylate is an alpha-1 adrenergic receptor blocker.	Neuronal Signaling
RL-0000475	Etodolac	Target Selective	Selleck	S1328	COX	Etodolac (Lodine) is a COX inhibitor with an IC50 of 53.5 nM.	Neuronal Signaling
RL-0003420	Etomidate	Target Selective	Selleck	S1329	GABA Receptor	Etomidate is a GABAA receptors agonist at GABAA receptors.	Neuronal Signaling
RL-0000491	Fluvoxamine maleate	Target Selective	Selleck	S1336	5-HT Receptor	Fluvoxamine maleate is a selective serotonin (5-HT) reuptake inhibitor (SSRI).	Neuronal Signaling
RL-0072039	Ginkgolide B	Target Selective	Selleck	S1343	PAFR	Ginkgolide B is a PAFR antagonist with IC50 of 3.6 √Ø_M.	Others
RL-0071477	TG100-115	Target Selective	Selleck	S1352	PI3K	TG100115 is a PI3KŒ≥/Œ¥ inhibitor with IC50 of 83 nM/235 nM, with little effect on PI3KŒ±/Œ≤. Phase 1/2.	PI3K/Akt/mTOR
RL-0000662	LIDOCAINE, Lidocaine hydrochloride, Lidoca¬ïne hydrochloride	Target Selective	Selleck	S1357	Histamine Receptor	Lidocaine is a selective inverse peripheral histamine H1-receptor agonist with an IC50 of >32 ŒºM.	Neuronal Signaling
RL-0000672	Loratadine, Loratidine, Loratidine (SCH 29851)	Target Selective	Selleck	S1358	Histamine Receptor	Loratadine is a selective inverse peripheral histamine H1-receptor agonist with an IC50 of >32 ŒºM.	Neuronal Signaling
RL-0074772	Losartan Potassium (DuP 753)	Target Selective	Selleck	S1359	RAAS	Losartan is an angiotensin II receptor antagonist, competes with the binding of angiotensin II to AT1 receptors with IC50 of 20 nM.	Endocrinology & Hormones
RL-0074773	Rigosertib (ON-01910)	Target Selective	Selleck	S1362	PLK	Rigosertib (ON-01910) is a non-ATP-competitive inhibitor of PLK1 with IC50 of 9 nM. It shows 30-fold greater selectivity against Plk2 and no activity to Plk3. Phase 3.	Cell Cycle
RL-0074774	BMS-707035	Target Selective	Selleck	S1366	Integrase	BMS-707035 is a specific HIV-I integrase (IN) inhibitor with IC50 of 15 nM. Phase 2.	Microbiology
RL-0074775	Ruxolitinib (INCB018424)	Target Selective	Selleck	S1378	JAK	INCB018424 is the first potent, selective, JAK1/2 inhibitor to enter the clinic with IC50 of 3.3 nM/2.8 nM, >130-fold selectivity for JAK1/2 versus JAK3. Phase 3.	JAK/STAT
RL-0074776	Isotretinoin	Target Selective	Selleck	S1379	Hydroxylase	It was developed to be used as a chemotherapy medication for the treatment of brain cancer, pancreatic cancer and more.	Metabolism
RL-0001879	OXCARBAZEPINE, Trileptal	Target Selective	Selleck	S1391	Sodium Channel	Oxcarbazepine inhibits the binding of [3H]BTX to sodium channels with IC50 of 160 ŒºM and also inhibits the influx of 22Na+ into rat brain synaptosomes with IC50 about 100 ŒºM.	Transmembrane Transporters
RL-0074777	Stavudine (d4T)	Target Selective	Selleck	S1398	Reverse Transcriptase	Stavudine is a nucleoside analog reverse transcriptase inhibitor (NARTI) active against HIV.	Microbiology
RL-0074778	Tenofovir Disoproxil Fumarate	Target Selective	Selleck	S1400	Reverse Transcriptase	Tenofovir disoproxil fumarate belongs to nucleotide analogue reverse transcriptase inhibitors (nRTIs).	Microbiology
RL-0001064	Rolipram	Target Selective	Selleck	S1430	PDE	Rolipram is a PDE4-inhibitor and an anti-inflammatory agent.Phase 1.	Metabolism
RL-0062015	VORICONAZOLE	Target Selective	Selleck	S1442	P450 (e.g. CYP17)	Voriconazole is a new triazole derivative similar to fluconazole and itraconazole that acts by inhibiting fungal cytochrome P-450-dependent, 14-alpha-sterol demethylase-mediated synthesis of ergosterol.	Metabolism
RL-0074779	Ispinesib (SB-715992)	Target Selective	Selleck	S1452	Kinesin	Ispinesib (SB-715992, CK0238273) is a potent, specific and reversible inhibitor of kinesin spindle protein (KSP) with Ki app of 1.7 nM, no inhibition to CENP-E, RabK6, MCAK, MKLP1, KHC or Kif1A. Phase 1/2.	Cytoskeletal Signaling
RL-0071302	Cilomilast, Cilomilast - SB 207499	Target Selective	Selleck	S1455	PDE	Cilomilast is a potent PDE4 inhibitor with IC50 of about 110 nM, has anti-inflammatory activity and low central nervous system activity.	Metabolism
RL-0074780	Zibotentan (ZD4054)	Target Selective	Selleck	S1456	Endothelin Receptor	Zibotentan (ZD4054) is a specific Endothelin (ET)A antagonist with IC50 of 21 nM, exhibiting no activity at ETB. Phase 3.	GPCR & G Protein
RL-0002889	TRIMEBUTINE MALEATE, Trimebutine	Target Selective	Selleck	S2085	Opioid Receptor	Trimebutine is an agonist of peripheral mu, kappa and delta opiate receptors, used as spasmolytic agent for treatment of both acute and chronic abdominal pain.	Neuronal Signaling
RL-0074801	Rasagiline Mesylate	Target Selective	Selleck	S2102	MAO	Rasagiline Mesylate is a new MAO-B inhibitor for the treatment of idiopathic Parkinson's disease.	Metabolism
RL-0074802	Naltrexone HCl	Target Selective	Selleck	S2103	Opioid Receptor	Naltrexone is an opioid receptor antagonist with IC50 of 8 nM used primarily in the management of alcohol dependence and opioid dependence.	Neuronal Signaling
RL-0001079	(-)-Sulpiride, (S)-(-)-Sulpiride, Levosulpiride	Target Selective	Selleck	S2104	Dopamine Receptor	Levosulpiride is a selective antagonist for D2 dopamine receptors used as an antipsychotic and prokinetic agent.	Neuronal Signaling
RL-0074803	Imidapril HCl	Target Selective	Selleck	S2109	RAAS	Imidapril HCl is a angiotensin-converting enzyme (ACE) inhibitor with IC50 of 2.6 nM, used for the treatment of hypertension.	Endocrinology & Hormones
RL-0000935	NAFTOPIDIL, Naftopidil dihydrochloride, Naftopidil hydrochloride	Target Selective	Selleck	S2126	Adrenergic Receptor	Naftopidil (Flivas) is a selective Œ±1-adrenergic receptor antagonist or alpha blocker with a Ki of 58.3 nM.	Neuronal Signaling
RL-0074804	Bazedoxifene HCl	Target Selective	Selleck	S2128	Estrogen/progestogen Receptor	Bazedoxifene HCl is a novel, non-steroidal, indole-based estrogen receptor modulator (SERM) binding to both ERŒ± and ERŒ≤ with IC50 of 23 nM and 89 nM.	Endocrinology & Hormones
RL-0074503	GSK1292263	Target Selective	Selleck	S2149	GPR	GSK1292263 is a novel GPR119 agonist, showing potential for the treatment of type 2 diabetes. Phase 2.	Endocrinology & Hormones
RL-0074805	LDE225 (NVP-LDE225,Erismodegib)	Target Selective	Selleck	S2151	Hedgehog/Smoothened	LDE225 (NVP-LDE225) is a Smoothened (Smo) antagonist, inhibiting Hedgehog (Hh) signaling with IC50 of 1.3 nM (mouse) and 2.5 nM (human), respectively. Phase 3.	Stem Cells & Wnt
RL-0074806	CGS 21680 HCl	Target Selective	Selleck	S2153	5-alpha Reductase	CGS 21680 HCl is an adenosine A2 receptor agonist with IC50 of 22 nM, exhibits 140-fold over A1 receptor.	Angiogenesis
RL-0074807	PF-4708671	Target Selective	Selleck	S2163	S6 Kinase	PF-4708671 is a cell-permeable inhibitor of p70 ribosomal S6 kinase (S6K1 isoform) with Ki/IC50 of 20 nM/160 nM, 400-fold greater selectivity for S6K1 than S6K2, and 4- and >20-fold selectivity for S6K1 than MSK1 and RSK1/2, respectively. First S6K1-specific inhibitor to be reported.	PI3K/Akt/mTOR
RL-0074808	PD128907 HCl	Target Selective	Selleck	S2168	Dopamine Receptor	PD 128907 HCl is a potent and selective dopamine D3 receptor agonist, with EC50 of 0.64 nM, exhibits 53-fold selectivity over dopamine D2 receptor.	Neuronal Signaling
RL-0074809	AG-14361	Target Selective	Selleck	S2178	PARP	AG14361 is a potent inhibitor of PARP1 with Ki of <5 nM. It is at least 1000-fold more potent than the benzamides.	DNA Damage
RL-0074350	LY2784544	Target Selective	Selleck	S2179	JAK	LY2784544 is a potent JAK2 inhibitor with IC50 of 3 nM, effective in JAK2V617F, 8- and 20-fold selective versus JAK1 and JAK3. Phase 2.	JAK/STAT
RL-0074810	MLN2238	Target Selective	Selleck	S2180	Proteasome	MLN2238 inhibits the chymotrypsin-like proteolytic (Œ≤5) site of the 20S proteasome with IC50 and Ki of 3.4 nM and 0.93 nM, respectively, also inhibits the caspase-like (Œ≤1) and trypsin-like (Œ≤2) proteolytic sites, with IC50 of 31 and 3500 nM.	Proteases
RL-0074811	SB743921	Target Selective	Selleck	S2182	Kinesin	SB743921 is a kinesin spindle protein (KSP) inhibitor with Ki of 0.1 nM, almost no affinity to MKLP1, Kin2, Kif1A, Kif15, KHC, Kif4 and CENP-E. Phase 1/2.	Cytoskeletal Signaling
RL-0072221	GSK461364	Target Selective	Selleck	S2193	PLK	GSK461364 inhibits purified Plk1 with Ki of 2.2 nM. It is more than 1000-fold selective against Plk2/3. Phase 1.	Cell Cycle
RL-0074300	SGI-1776, SGI-1776 free base	Target Selective	Selleck	S2198	Pim	SGI-1776 is a novel ATP competitive inhibitor of Pim1 with IC50 of 7 nM, 50- and 10-fold selective versus Pim2 and Pim3, also potent to Flt3 and haspin. Phase 1.	JAK/STAT
RL-0074812	OSI-420	Target Selective	Selleck	S2205	EGFR	OSI-420 is the active metabolite of Erlotinib (EGFR inhibitor with IC50 of 2 nM).	Protein Tyrosine Kinase
RL-0072155	Mubritinib (TAK 165), TAK 165	Target Selective	Selleck	S2216	HER2	Mubritinib (TAK-165) is a potent inhibitor of HER2/ErbB2 with IC50 of 6 nM; no activity to EGFR, FGFR, PDGFR, JAK1, Src and Blk.	Protein Tyrosine Kinase
RL-0074985	Irinotecan HCl Trihydrate_Selleck	Target Selective	Selleck	S2217	Topoisomerase	Irinotecan prevents DNA from unwinding by inhibition of topoisomerase 1.	DNA Damage
RL-0074374	Apatinib, Apatinib (YN968D1)	Target Selective	Selleck	S2221	VEGFR	Apatinib is an orally bioavailable, selective VEGFR2 inhibitor with IC50 of 1 nM.	Protein Tyrosine Kinase
RL-0074619	VX-765	Target Selective	Selleck	S2228	Caspase	VX-765 is a potent and selective inhibitor of caspase-1 with Ki of 0.8 nM.	Apoptosis
RL-0074813	LY2157299	Target Selective	Selleck	S2230	TGF-beta/Smad	LY2157299 is a potent TGFŒ≤ receptor I (TŒ≤RI) inhibitor with IC50 of 56 nM. Phase 2.	TGF-beta/Smad
RL-0074845	TAE226 (NVP-TAE226)	Target Selective	Selleck	S2820	FAK	NVP-TAE226 is a potent FAK inhibitor with IC50 of 5.5 nM and modestly potent to Pyk2, ~10- to 100-fold less potent against InsR, IGF-1R, ALK, and c-Met.	Angiogenesis
RL-0074846	OC000459	Target Selective	Selleck	S2822	GPR	OC000459 is a potent and selective D prostanoid receptor 2 (DP2) antagonist with IC50 of 13 nM.	Endocrinology & Hormones
RL-0061396	TPCA-1, [5-(p-Fluorophenyl)-2-ureido]thiophene-3-carboxamide	Target Selective	Selleck	S2824	IŒ∫B/IKK	TPCA-1 is an inhibitor of IKK-2 with IC50 of 17.9 nM, inhibits NF-Œ∫B pathway, exhibits 22-fold selectivity over IKK-1.	NF-Œ∫B
RL-0074847	ML133 HCl	Target Selective	Selleck	S2825	Potassium Channel	ML133 is a selective potassium channel inhibitor for Kir2.1 with IC50 of 1.8 ŒºM (pH 7.4) and 290 nM (pH 8.5), has no effect on Kir1.1 and weak activity for Kir4.1 and Kir7.1.	Transmembrane Transporters
RL-0018470	JNJ-1661010	Target Selective	Selleck	S2828	FAAH	JNJ-1661010 is a potent and selective FAAH inhibitor with IC50 of 10 nM (rat) and 12 nM (human), exhibits >100-fold selectivity for FAAH-1 when compared to FAAH-2.	Metabolism
RL-0074848	SAR131675	Target Selective	Selleck	S2842	VEGFR	SAR131675 is a VEGFR3 inhibitor with IC50/Ki of 23 nM/12 nM, about 50- and 10-fold more selective for VEGFR3 than VEGFR1/2, little activity against Akt1, CDKs, PLK1, EGFR, IGF-1R, c-Met, Flt2 etc.	Protein Tyrosine Kinase
RL-0070177	BI-D1870	Target Selective	Selleck	S2843	S6 Kinase	BI-D1870 is an ATP-competitive inhibitor of S6 ribosome for RSK1/2/3/4 with IC50 of 31 nM/24 nM/18 nM/15 nM, respectively; 10- to 100-fold selectivity for RSK than MST2, GSK-3Œ≤, MARK3, CK1 and Aurora B.	PI3K/Akt/mTOR
RL-0000677	BML-190, Indomethacin morpholinylamide	Target Selective	Selleck	S2854	Cannabinoid Receptor	BML-190 is a selective cannabinoid CB2 receptor inverse agonist with Ki of 435 nM, with 50-fold selectivity over CB1 receptor.	GPCR & G Protein
RL-0074966	PTC-209 HBr	Target Selective	Selleck	S7539	Others	PTC-209 HBr is the hydrobromide salt of PTC-209, which is a potent and selective BMI-1 inhibitor with IC50 of 0.5 ŒºM, and results in irreversible reduction of cancer-initiating cells (CICs).	Others
RL-0074967	IM-12	Target Selective	Selleck	S7566	GSK-3	IM-12 is a selective GSK-3Œ≤ inhibitor with IC50 of 53 nM, and also enhances canonical Wnt signalling.	PI3K/Akt/mTOR
RL-0074968	N6022	Target Selective	Selleck	S7589	Others	N6022 is a selective, and reversible inhibitor of S-nitrosoglutathione reductase (GSNOR) with IC50 of 8 nM and Ki of 2.5 nM. Phase 1/2.	Others
RL-0074969	Santacruzamate A (CAY10683)	Target Selective	Selleck	S7595	HDAC	Santacruzamate A (CAY10683) is a potent and selective HDAC inhibitor with IC50 of 119 pM for HDAC2, >3600-fold selectivity over other HDACs.	DNA Damage
RL-0074970	Filgotinib (GLPG0634)	Target Selective	Selleck	S7605	JAK	Filgotinib (GLPG0634) is a selective JAK1 inhibitor with IC50 of 10 nM, 28 nM, 810 nM, and 116 nM for JAK1, JAK2, JAK3, and TYK2, respectively. Phase 2.	JAK/STAT
RL-0074971	SMI-4a	Target Selective	Selleck	S8005	Pim	SMI-4a is a potent inhibitor of Pim1 with IC50 of 17 nM, modest potent to Pim-2, does not significantly inhibit other serine/threonine- or tyrosine-kinases.	JAK/STAT
RL-0074972	VE-821	Target Selective	Selleck	S8007	ATM/ATR	VE-821 is a potent and selective ATP competitive inhibitor of ATR with Ki/IC50 of 13 nM/26 nM, shows inhibition of H2AX phosphorylation, minimal activity against PIKKs ATM, DNA-PK, mTOR and PI3KŒ≥.	DNA Damage
RL-0063176	4-[[(3-Phenoxyphenyl)methyl]amino]benzenepropanoic acid, GW9508	Target Selective	Selleck	S8014	GPR	GW9508 is a potent and selective agonist for FFA1 (GPR40) with pEC50 of 7.32, 100-fold selective against GPR120, stimulates insulin secretion in a glucose-sensitive manner.	Endocrinology & Hormones
RL-0063050	GW 0742, [4-[[[2-[3-Fluoro-4-(trifluoromethyl)phenyl]-4-methyl-5-thiazolyl]methyl]thio]-2-methylphenoxy]acetic acid	Target Selective	Selleck	S8020	PPAR	GW0742 is a potent and highly selective PPARŒ≤/Œ¥ agonist, with IC50 of 1 nM, with 1000-fold selectivity over hPPARŒ± and hPPARŒ≥.	Metabolism
RL-0074973	Empagliflozin (BI 10773)	Target Selective	Selleck	S8022	SGLT	Empagliflozin (BI-10773) is a potent and selective SGLT-2 inhibitor with IC50 of 3.1 nM, exhibits >300-fold selectivity over SGLT-1, 4, 5 and 6. Phase 3.	GPCR & G Protein
RL-0063164	2-[(3 4-Dimethoxybenzoyl)amino]-4 5 6 7-benzo[b]thiophene-3-carboxamide, TCS 359	Target Selective	Selleck	S8023	FLT3	TCS 359 is a potent FLT3 inhibitor with IC50 of 42 nM.	Angiogenesis
RL-0074974	Tariquidar	Target Selective	Selleck	S8028	P-gp	Tariquidar (XR9576) is a potent and selective noncompetitive inhibitor of P-glycoprotein with Kd of 5.1 nM, reverses drug resistance in MDR cell Lines. Phase 3.	Transmembrane Transporters
RL-0063028	N6-[2-[[4-(Diethylamino)-1-methylbutyl]amino]-6-methyl-4-pyrimidinyl]-2-methyl-4 6-quinolinediamine trihydrochloride, NSC 23766	Target Selective	Selleck	S8031	Rac	NSC 23766 is an inhibitor of Rac GTPase targeting Rac activation by guanine nucleotide exchange factors (GEFs) with IC50 of ~50 ŒºM; does not inhibit the closely related targets, Cdc42 or RhoA.	Cell Cycle
RL-0074975	PRT062607 (P505-15, BIIB057) HCl	Target Selective	Selleck	S8032	Syk	PRT062607 (P505-15) HCl is a novel, highly selective Syk inhibitor with IC50 of 1 nM, >80-fold selective for Syk than Fgr, Lyn, FAK, Pyk2 and Zap70.	Angiogenesis
RL-0074976	VU 0364439	Target Selective	Selleck	S8035	GluR	VU 0364439 is a mGlu4 positive allosteric modulator (PAM), with EC50 of 19.8 nM.	Neuronal Signaling
RL-0063082	5-(1H-Indol-3-ylmethyl)-3-methyl-2-thioxo-4-imidazolidinone, Necrostatin-1	Target Selective	Selleck	S8037	TNF-alpha	Necrostatin-1 is a specific RIP1 inhibitor and inhibits TNF-Œ±-induced necroptosis with EC50 of 490 nM.	Apoptosis
RL-0074977	PU-H71	Target Selective	Selleck	S8039	HSP (e.g. HSP90)	PU-H71 is a potent and selective inhibitor of HSP90 with IC50 of 51 nM. Phase 1.	Cytoskeletal Signaling
RL-0061663	5-(3-Methoxy-4-((4-methoxybenzyl)oxy)benzyl)-pyrimidine-2,4-diamine, GW2580	Target Selective	Selleck	S8042	CSF-1R	GW2580 is a selective CSF-1R inhibitor for c-FMS with IC50 of 30 nM, 150- to 500-fold selective compared to b-Raf, CDK4, c-KIT, c-SRC, EGFR, ERBB2/4, ERK2, FLT-3, GSK3, ITK, JAK2 etc.	Protein Tyrosine Kinase
RL-0064267	3-Hydroxy-naphthalene-2-carboxylic acid (3,4-dihydroxy-benzylidene)-hydrazide monohydrate, Dynasore	Target Selective	Selleck	S8047	Dynamin	Dynasore is a cell-permeable, reversible non-competitive dynamin inhibitor of GTPase activity of dynamin 1/2, with IC50 of 15 ŒºM, also inhibits the mitochondrial dynamin Drp1, with no effect against other small GTPase.	Others
RL-0074592	ABT-199 (GDC-0199)	Target Selective	Selleck	S8048	Bcl-2	ABT-199 (GDC-0199) is a Bcl-2-selective inhibitor with Ki of <0.01 nM, >4800-fold more selective versus Bcl-xL and Bcl-w, and no activity to Mcl-1. Phase 2.	Apoptosis
RL-0074582	Lomeguatrib	Target Selective	Selleck	S8056	DNA Methyltransferase	Lomeguatrib is a potent inhibitor of O6-alkylguanine-DNA-alkyltransferase with IC50 of 5 nM.	Epigenetics
RL-0074978	Pacritinib (SB1518)	Target Selective	Selleck	S8057	JAK	Pacritinib (SB1518) is a potent and selective inhibitor of Janus Kinase 2 (JAK2) and Fms-Like Tyrosine Kinase-3 (FLT3) with IC50s of 23 and 22 nM, respectively.	JAK/STAT
RL-0074979	NSC 405020	Target Selective	Selleck	S8072	MMP	NSC 405020 is a noncatalytic inhibitor of MT1-MMP, directly interacts with PEX domain of MT1-MMP, affects PEX homodimerization but not catalytic activity of MT1-MMP.	Proteases
RL-0074980	PluriSIn #1 (NSC 14613)	Target Selective	Selleck	S8076	Dehydrogenase	PluriSIn #1 is an inhibitor of the stearoyl-coA desaturase 1 (SCD1), which is able to selectively eliminate hPSCs.	Metabolism
RL-0069727	VX-680, VX-680 (MK-0457 Tozasertib), VX-680 (MK-0457), VX-680 (Tozasertib, MK-0457)	Target Selective	Selleck	S1048	Aurora Kinase	VX-680 (Tozasertib, MK-0457) is a pan-Aurora inhibitor, mostly against Aurora A with Kiapp of 0.6 nM, less potent towards Aurora B/Aurora C and 100-fold more selective for Aurora A than 55 other kinases. Phase 2.	Cell Cycle
RL-0074981	MK-2206 2HCl	Target Selective	Selleck	S1078	Akt	MK-2206 2HCl is a highly selective inhibitor of Akt1/2/3 with IC50 of 8 nM/12 nM/65 nM, respectively; no inhibitory activities against 250 other protein kinases observed. Phase 2.	PI3K/Akt/mTOR
RL-0070422	GSK1904529A	Target Selective	Selleck	S1093	IGF-1R	GSK1904529A is a selective inhibitor of IGF-1R and IR with IC50 of 27 nM and 25 nM, >100-fold more selective for IGF-1R/InsR than Akt1/2, Aurora A/B,B-Raf, CDK2, EGFR etc.	Protein Tyrosine Kinase
RL-0074617	Varespladib (LY315920)	Target Selective	Selleck	S1110	Phospholipase (e.g. PLA)	LY315920 (Varespladib) is a potent and selective human non-pancreatic secretory phospholipase A2 (hnsPLA) inhibitor with IC50 of 7 nM,. Phase 3.	Metabolism
RL-0074756	17-AAG (Tanespimycin)	Target Selective	Selleck	S1141	HSP (e.g. HSP90)	17-AAG is a potent HSP90 inhibitor with IC50 of 5 nM, having a 100-fold higher binding affinity for HSP90 derived from tumour cells than HSP90 from normal cells.	Cytoskeletal Signaling
RL-0070437	WZ4002	Target Selective	Selleck	S1173	EGFR	WZ4002 is a novel, mutant-selective EGFR inhibitor for EGFR(L858R)/(T790M) with IC50 of 2 nM/8 nM; does not inhibit ERBB2 phosphorylation (T798I).	Protein Tyrosine Kinase
RL-0002904	Exemestane	Target Selective	Selleck	S1196	Aromatase	Exemestane is an aromatase inhibitor, inhibits human placental and rat ovarian aromatase with IC50 of 30 nM and 40 nM, respectively.	Endocrinology & Hormones
RL-0003377	LETROZOL, Letrozole	Target Selective	Selleck	S1235	Aromatase	Letrozole is a third generation inhibitor of aromatase with IC50 of 0.07-20 nM.	Endocrinology & Hormones
RL-0061419	4-(4-Fluorophenyl)-2-(4-methylsulfinylphenyl)-5-(4-pyridyl)1H-imidazole, HCl, SB 203580, SB 203580 hydrochloride	Target Selective	Selleck	S1076	p38 MAPK	SB203580 is a p38 MAPK inhibitor with IC50 of 0.3-0.5 ŒºM, 10-fold less sensitive to SAPK3(106T) and SAPK4(106T) and blocks PKB phosphorylation with IC50 of 3-5 ŒºM.	MAPK
RL-0069803	KU-55933, KU-55933 (ATM Kinase Inhibitor)	Target Selective	Selleck	S1092	ATM/ATR	KU-55933 is a potent and specific ATM inhibitor with IC50/Ki of 12.9 nM/2.2 nM, and is highly selective for ATM as compared to DNA-PK, PI3K/PI4K, ATR and mTOR.	DNA Damage
RL-0070002	BI 2536	Target Selective	Selleck	S1109	PLK	BI2536 is a potent Plk1 inhibitor with IC50 of 0.83 nM. It shows 4- and 11-fold greater selectivity against Plk2 and Plk3. Phase 2.	Cell Cycle
RL-0074755	ADL5859 HCl	Target Selective	Selleck	S1139	Opioid Receptor	ADL5859 HCl is a Œ¥-opioid receptor agonist with Ki of 0.8 nM, selectivity against opioid receptor Œ∫, Œº, and weak inhibitory activity at the hERG channel. Phase 2.	Neuronal Signaling
RL-0074761	Ganetespib (STA-9090)	Target Selective	Selleck	S1159	HSP (e.g. HSP90)	Ganetespib is an HSP90 inhibitor with IC50 of 4 nM in OSA 8 cells, induces apoptosis of OSA cells while normal osteoblasts are not affected; active metabolite of STA-1474.	Cytoskeletal Signaling
RL-0074764	TAK-700 (Orteronel)	Target Selective	Selleck	S1195	P450 (e.g. CYP17)	TAK-700 (Orteronel) is a potent and highly selective human 17,20-lyase inhibitor with IC50 of 38 nM, exhibits >1000-fold selectivity over other CYPs (e.g. 11-hydroxylase and CYP3A4). Phase 3.	Metabolism
RL-0074767	2-Methoxyestradiol (2-MeOE2)	Target Selective	Selleck	S1233	HIF	2-Methoxyestradiol depolymerizes microtubules and blocks HIF-1Œ± nuclear accumulation and HIF-transcriptional activity. Phase 2.	Angiogenesis
RL-0070003	BX 912	Target Selective	Selleck	S1275	PDK-1	BX912 is a potent and specific PDK1 inhibitor with IC50 of 12 nM, 9- and 105- fold greater selectivity for PDK1 than PKA and PKC, respectively. In comparison to GSK3Œ≤, selectivity for PDK1 is 600-fold.	PI3K/Akt/mTOR
RL-0074333	VX-745	Target Selective	Selleck	S1458	p38 MAPK	VX-745 is a potent and selective inhibitor of p38Œ± with IC50 of 10 nM, 22-fold greater selectivity versus p38Œ≤ and no inhibition to p38Œ≥.	MAPK
RL-0074336	PHA-793887	Target Selective	Selleck	S1487	CDK	PHA-793887 is a novel and potent inhibitor of CDK2, CDK5 and CDK7 with IC50 of 8 nM, 5 nM and 10 nM. It is greater than 6-fold more selective for CDK2, 5, and 7 than CDK1, 4, and 9. Phase 1.	Cell Cycle
RL-0074785	CP-673451	Target Selective	Selleck	S1536	PDGFR	CP 673451 is a selective inhibitor of PDGFRŒ±/Œ≤ with IC50 of 10 nM/1 nM, exhibits >450-fold selectivity over other angiogenic receptors, has antiangiogenic and antitumor activity.	Protein Tyrosine Kinase
RL-0074790	VX-809 (Lumacaftor)	Target Selective	Selleck	S1565	CFTR	VX-809 acts to correct CFTR mutations common in cystic fibrosis by increasing mutant CFTR (F508del-CFTR) maturation,EC50 of 0.1 ŒºM. Phase 3.	Transmembrane Transporters
RL-0074795	Semagacestat (LY450139)	Target Selective	Selleck	S1594	Gamma-secretase	Semagacestat (LY450139) is a Œ≥-secretase blocker for AŒ≤42, AŒ≤40 and AŒ≤38 with IC50 of 10.9 nM, 12.1 nM and 12.0 nM, also inhibits Notch signaling with IC50 of 14.1 nM. Phase 3.	Proteases
RL-0002880	ACADESINE	Target Selective	Selleck	S1802	AMPK	Acadesine results in accumulation of ZMP, which mimics the stimulating effect of AMP on AMPK and AMPK kinase. Phase 3.	PI3K/Akt/mTOR
RL-0001672	Tolfenamic acid	Target Selective	Selleck	S1959	COX	Tolfenamic acid is a COX-2 inhibitor with IC50 of 0.2 ŒºM.	Neuronal Signaling
RL-0001928	REBAMIPIDE	Target Selective	Selleck	S2032	Others	Rebamipide is a cholecystokinin type 1 (CCK1) receptor inhibitor for inhibiting [125I]BH-CCK-8S with IC50 of 37.7 ŒºM.	Others
RL-0074710	Zosuquidar (LY335979) 3 HCl	Target Selective	Selleck	S1481	P-gp	Zosuquidar (LY335979) is a potent modulator of P-glycoprotein-mediated multi-drug resistance with Ki of 60 nM. Phase 3.	Transmembrane Transporters
RL-0071598	Org 27569	Target Selective	Selleck	S1534	Cannabinoid Receptor	Org 27569 is an allosteric modulator of cannabinoid CB1 receptor, induces a CB1 receptor state that is characterized by enhanced agonist affinity and decreased inverse agonist affinity.	GPCR & G Protein
RL-0074789	Pimobendan	Target Selective	Selleck	S1550	PDE	Pimobendan is a selective inhibitor of PDE3 with IC50 of 0.32 ŒºM.	Metabolism
RL-0074794	Apixaban	Target Selective	Selleck	S1593	Factor Xa	Apixaban is a highly selective, reversible inhibitor of Factor Xa with Ki of 0.08 nM and 0.17 nM in human and rabbit, respectively.	Metabolism
RL-0001065	Ranitidine, Ranitidine hydrochloride	Target Selective	Selleck	S1801	Histamine Receptor	Ranitidine is a histamine H2-receptor antagonist with IC50 of 3.3 ¬± 1.4 ŒºM.	Neuronal Signaling
RL-0001210	Tropicamide	Target Selective	Selleck	S1913	AChR	Tropicamide is an anticholinergic and a muscarinic receptor subtype M4-preferring antagonist with IC50 of 8.0 nM.	Neuronal Signaling
RL-0001610	GINKGOLIDE A	Target Selective	Selleck	S2026	GABA Receptor	Ginkgolide A is an extract from in Ginkgo biloba and a g-aminobutyric acid (GABA) antagonist with a Ki of 14.5 √Ø_M.	Neuronal Signaling
RL-0001822	ATORVASTATIN CALCIUM	Target Selective	Selleck	S2077	HMG-CoA Reductase	Atorvastatin (Lipitor) is an inhibitor of HMG-CoA reductase used as a cholesterol-lowering medication that blocks the production of cholesterol.	Metabolism
RL-0074814	Esomeprazole Sodium	Target Selective	Selleck	S2233	ATPase	Esomeprazole sodium (Nexium) is a sodium salt of esomeprazole that is a potent proton pump inhibitor with an IC50 of 0.076 mg/kg.	Transmembrane Transporters
RL-0074818	Bupivacaine HCl	Target Selective	Selleck	S2454	cAMP	Bupivacaine hydrochloride(Marcain) is a more potent cAMP production inhibitor with an IC50 of 2.3 ŒºM	GPCR & G Protein
RL-0001866	GLICLAZIDE	Target Selective	Selleck	S2601	Potassium Channel	Gliclazide (Diamicron) is a whole-cell beta-cell ATP-sensitive potassium currents blocker with an IC50 of 184 ¬± 30 nM.	Transmembrane Transporters
RL-0074824	NPS-2143	Target Selective	Selleck	S2633	CaSR	NPS 2143 is a novel potent and selective antagonist of Ca(2+) receptor with IC50 of 43 nM.	GPCR & G Protein
RL-0074293	Ibrutinib (PCI-32765), PCI-32765 (Ibrutinib)	Target Selective	Selleck	S2680	BTK	Ibrutinib is a potent and highly selective Btk inhibitor with IC50 of 0.5 nM, modestly potent to Bmx, CSK, FGR, BRK, HCK, less potent to EGFR, Yes, ErbB2, JAK3, etc.	Angiogenesis
RL-0074833	CP-91149	Target Selective	Selleck	S2717	Phosphorylase	CP-91149 is a selective glycogen phosphorylase (GP) inhibitor with IC50 of 0.13 ŒºM in the presence of glucose, 5- to 10-fold less potent in the absence of glucose.	Metabolism
RL-0074837	Dalcetrapib (JTT-705, RO4607381)	Target Selective	Selleck	S2772	CETP	Dalcetrapib (JTT-705) is a rhCETP inhibitor with IC50 of 0.2 ŒºM that increases the plasma HDL cholesterol. Phase 3.	Metabolism
RL-0074842	Torcetrapib	Target Selective	Selleck	S2792	CETP	Torcetrapib is a CETP inhibitor with IC50 of 37 nM, elevates HDL-C and reduces nonHDL-C in plasma. Phase 3.	Metabolism
RL-0074817	Forskolin	Target Selective	Selleck	S2449	cAMP	Forskolin is a ubiquitous activator of eukaryotic adenylyl cyclase (AC), commonly used to raise levels of cAMP in the study and research of cell physiology.	GPCR & G Protein
RL-0074821	Tolvaptan	Target Selective	Selleck	S2593	Vasopressin Receptor	Tolvaptan is a selective, competitive arginine vasopressin receptor 2 antagonist with an IC50 of 1.28ŒºM for the inhibition of AVP-induced platelet aggregation.	GPCR & G Protein
RL-0074823	BMS-378806	Target Selective	Selleck	S2632	gp120/CD4	BMS-378806 selectively inhibits the binding of HIV-1 gp120 to the CD4receptor with EC50 of 0.85-26.5 nM in virus.	Others
RL-0069822	AS-252424, PI 3-Kg/CKII Inhibitor (AS 252424)	Target Selective	Selleck	S2671	PI3K	AS-252424 is a novel, potent PI3K√Ø_ inhibitor with IC50 of 30 nM with 30-fold selectivity for PI3K√Ø_ than PI3K√Ø¬±, and low inhibitory activity towards PI3K√Ø√¢/√Ø_.	PI3K/Akt/mTOR
RL-0074832	LY411575	Target Selective	Selleck	S2714	Gamma-secretase	LY411575 is a potent Œ≥-secretase inhibitor with IC50 of 0.078 nM/0.082 nM (membrane/cell-based), also inhibits Notch clevage with withIC50 of 0.39 nM.	Proteases
RL-0074836	Canagliflozin	Target Selective	Selleck	S2760	SGLT	Canagliflozin is a highly potent and selective SGLT2 inhibitor for hSGLT2 with IC50 of 2.2 nM, exhibits 413-fold selectivity over hSGLT1.	GPCR & G Protein
RL-0074305	AEB071 (Sotrastaurin), Sotrastaurin	Target Selective	Selleck	S2791	PKC	Sotrastaurin is a potent and selective pan-PKC inhibitor, mostly for PKCŒ∏ with Ki of 0.22 nM; inactive to PKCŒ∂. Phase 1/2.	TGF-beta/Smad
RL-0001162	Tyrphostin AG 879	Target Selective	Selleck	S2816	HER2	Tyrphostin AG 879 potently inhibits HER2/ErbB2 with IC50 of 1 √Ø_M, 100- and 500-fold higher selective to ErbB2 than PDGFR and EGFR.	Protein Tyrosine Kinase
RL-0074849	MRS 2578	Target Selective	Selleck	S2855	P2 Receptor	MRS2578 is a potent P2Y6 receptor antagonist with IC50 of 37 nM, exhibits insignificant activity at P2Y1, P2Y2, P2Y4,and P2Y11 receptors.	Neuronal Signaling
RL-0074850	VU 0364770	Target Selective	Selleck	S2862	GluR	VU 0364770 is a positive allosteric modulator(PAM) of mGlu4 with EC50 of 1.1 ŒºM, exhibits insignificant activity at 68 other receptors, including other mGlu subtypes.	Neuronal Signaling
RL-0074851	ML130 (Nodinitib-1)	Target Selective	Selleck	S2863	NOD1	ML130 is a potent and selective inhibitor of NOD1 with IC50 of 0.56 ŒºM, inhibits NF-Œ∫B activation, exhibits 36-fold selectivity over NOD2.	NF-Œ∫B
RL-0061394	IMD 0354, N-(3 5-Bis-trifluoromethylphenyl)-5-chloro-2-hydroxybenzamide, N-(3 5-Bis-trifluoromethylphenyl)-5-chloro-2-hydroxybenzamide IMD-0354	Target Selective	Selleck	S2864	IŒ∫B/IKK	IMD-0354 is an IKKŒ≤ inhibitor and blocks IŒ∫BŒ± phosphorylation in NF-Œ∫B pathway.	NF-Œ∫B
RL-0074852	U-104	Target Selective	Selleck	S2866	Carbonic Anhydrase	U-104 is a potent carbonic anhydrase (CA) inhibitor for CA IX and CA XII with Ki of 45.1 nM and 4.5 nM, respectively, very low inhibition for CA I and CA II.	Metabolism
RL-0063070	2-Chloro-5-nitro-N-4-pyridinylbenzamide, T0070907	Target Selective	Selleck	S2871	PPAR	T0070907 is a potent and selective PPARŒ≥ inhibitor with IC50 of 1 nM, with a >800-fold selectivity over PPARŒ± and PPARŒ¥.	DNA Damage
RL-0003340	(-)-MK 801 maleate	Target Selective	Selleck	S2876	GluR	MK-801 is a potent, selective and non-competitive NMDA receptor antagonist with Kd of 37.2 nM in rat brain membranes.	Neuronal Signaling
RL-0063151	IKK 16, IKK-16 (IKK Inhibitor VII), N-(4-Pyrrolidin-1-yl-piperidin-1-yl)-[4-(4-benzo[b]thiophen-2-yl-pyrimidin-2-ylamino)phenyl]carboxamide hydrochloride	Target Selective	Selleck	S2882	IŒ∫B/IKK	IKK 16 is a selective IŒ∫B kinase (IKK) inhibitor for IKK-2, IKK complex and IKK-1 with IC50 of 40 nM, 70 nM and 200 nM, respectively.	NF-Œ∫B
RL-0070155	PF-562271	Target Selective	Selleck	S2890	FAK	PF-562271 is a potent, ATP-competitive, reversible inhibitor of FAK with IC50 of 1.5 nM, ~10-fold less potent for Pyk2 than FAK and >100-fold selectivity against other protein kinases, except for some CDKs.	Angiogenesis
RL-0070038	SB 742457 hydrochloride (GSK 742457 hydrochloride), SB742457	Target Selective	Selleck	S2894	5-HT Receptor	SB742457 is a highly selective 5-HT6 receptor antagonist with pKi of 9.63, exhibits >100-fold selectivity over other receptors. Phase 2.	Neuronal Signaling
RL-0061462	ZM 306416 hydrochloride, ZM-306416	Target Selective	Selleck	S2897	VEGFR	ZM 306416 is a VEGFR (Flt and KDR) inhibitor for VEGFR1 with IC50 of 0.33 ŒºM, but also found to inhibit EGFR with IC50 of <10 nM.	Protein Tyrosine Kinase
RL-0074853	GNF-2	Target Selective	Selleck	S2899	Bcr-Abl	GNF-2 is a highly selective non-ATP competitive inhibitor of Bcr-Abl, shows no activity to Flt3-ITD, Tel-PDGFR, TPR-MET and Tel-JAK1 transformed tumor cells.	Angiogenesis
RL-0074854	Ki16198	Target Selective	Selleck	S2906	LPA Receptor	Ki16198 is the methyl ester of Ki16425, which is a LPA antagonist and inhibits LPA1- and LPA3-induced inositol phosphate production with Ki of 0.34 ŒºM and 0.93 ŒºM, respectively, shows weaker inhibition for LPA2, no activity at LPA4, LPA5, LPA6.	GPCR & G Protein
RL-0064101	G0 6983, Go 6983	Target Selective	Selleck	S2911	PKC	Go 6983 is a pan-PKC inhibitor against for PKCŒ±, PKCŒ≤, PKCŒ≥ and PKCŒ¥ with IC50 of 7 nM, 7 nM, 6 nM and 10 nM, respectively; less potent to PKCŒ∂ and inactive to PKCŒº.	TGF-beta/Smad
RL-0074705	WZ811	Target Selective	Selleck	S2912	CXCR	WZ811 is a highly potent competitive CXCR4 antagonist with EC50 of 0.3 nM.	GPCR & G Protein
RL-0000789	GW9662	Target Selective	Selleck	S2915	PPAR	GW9662 is a selective PPAR antagonist for PPARŒ≥ with IC50 of 3.3 nM, with at least 100 to 1000-fold functional selectivity in cells with PPARŒ≥versus PPARŒ± and PPARŒ¥.	DNA Damage
RL-0074890	Zebularine	Target Selective	Selleck	S7113	DNA Methyltransferase	Zebularine is a DNA methylation inhibitor that forms a covalent complex with DNA methyltransferases, also inhibits cytidinedeaminase with Ki of 2 ŒºM.	Epigenetics
RL-0074891	AMG-517	Target Selective	Selleck	S7115	TRPV	AMG 517 is a potent and selective TRPV1 antagonist, antagonizes capsaicin, proton, and heat activation of TRPV1 with IC50 of 0.76 nM, 0.62 nM and 1.3 nM.	Others
RL-0074892	SC144	Target Selective	Selleck	S7124	Others	SC144 is an orally active small-molecule gp130 inhibitor.	Others
RL-0074893	KPT-185	Target Selective	Selleck	S7125	CRM1	KPT-185 is a selective CRM1 inhibitor.	Transmembrane Transporters
RL-0074894	EPZ-6438	Target Selective	Selleck	S7128	Histone Methyltransferase	EPZ-6438 is a potent, and selective EZH2 inhibitor with Ki and IC50 of 2.5 nM and 11 nM, exhibiting a 35-fold selectivity versus EZH1 and >4,500-fold selectivity relative to 14 other HMTs.	Epigenetics
RL-0074895	PYR-41	Target Selective	Selleck	S7129	E1 Activating	PYR-41 is the first cell-permeable inhibitor of ubiquitin-activating enzyme E1, with no activity at E2.	Ubiquitin
RL-0028269	PR-619	Target Selective	Selleck	S7130	DUB	PR-619 is a non-selective, reversible inhibitor of the deubiquitinylating enzymes (DUBs) with EC50 of 1-20 ŒºM.	Ubiquitin
RL-0074896	P22077	Target Selective	Selleck	S7133	DUB	P22077 is an inhibitor of ubiquitin-specific protease USP7 with EC50 of 8.6 ŒºM, also inhibits the closely related USP47.	Ubiquitin
RL-0074855	ML161	Target Selective	Selleck	S2916	Others	ML-161 is an allosteric inhibitor of PAR1 with IC50 of 0.26 ŒºM.	Others
RL-0000909	Piceatannol	Target Selective	Selleck	S3026	Syk	Piceatannol, a natural stilbene, is a selective Syk inhibitor and ~10-fold selectivity versus Lyn.	Angiogenesis
RL-0003037	Brinzolamide	Target Selective	Selleck	S3178	Carbonic Anhydrase	Brinzolamide is a potent carbonic anhydrase II inhibitor with IC50 of 3.19 nM.	Metabolism
RL-0001183	Triamterene	Target Selective	Selleck	S4080	Sodium Channel	Triamterene blocks epithelial Na+ channel (ENaC) in a voltage-dependent manner with IC50 of 4.5 ŒºM.	Transmembrane Transporters
RL-0069922	Tenovin-6	Target Selective	Selleck	S4900	p53	Tenovin-6 is a small molecule activator of p53 transcriptional activity.	Apoptosis
RL-0061336	4-Amino-5-(4-chlorophenyl)-7-(t-butyl)pyrazolo[3,4-d]pyrimidine, PP2, PP2 (AG 1879)	Target Selective	Selleck	S7008	Src	PP2 is Src family kinase inhibitor, potently inhibits Lck/Fyn with IC50 of 4 nM/5 nM, ~100-fold less potent to EGFR, inactive for ZAP-70, JAK2 and PKA.	Angiogenesis
RL-0074881	Wnt-C59 (C59)	Target Selective	Selleck	S7037	Wnt/beta-catenin	Wnt-C59 (C59) is a PORCN inhibitor for Wnt3A-mediated activation of a multimerized TCF-binding site driving luciferase with IC50 of 74 pM.	Stem Cells & Wnt
RL-0074886	IWP-2	Target Selective	Selleck	S7085	Wnt/beta-catenin	IWP-2 is an inhibitor of Wnt processing and secretion with IC50 of 27 nM, selective blockage of Porcn-mediated Wnt palmitoylation, does not affect Wnt/Œ≤-catenin in general and displays no effect against Wnt-stimulated cellular responses.	Stem Cells & Wnt
RL-0070034	Rimonabant, Rimonabant hydrochloride (SR 141716A)	Target Selective	Selleck	S3021	Cannabinoid Receptor	Rimonabant is a selective antagonist of CB1 with IC50 of 13.6 nM and EC50 of 17.3 nM in hCB1 transfected HEK 293 membrane.	GPCR & G Protein
RL-0003373	Gliquidone	Target Selective	Selleck	S3151	Potassium Channel	Gliquidone is an ATP-sensitive K+ channel antagonist with IC50 of 27.2 nM.	Transmembrane Transporters
RL-0074866	Ticagrelor	Target Selective	Selleck	S4079	P2 Receptor	Ticagrelor is the first reversibly binding oral P2Y12 receptor antagonist, also inhibits CYP2C9 and 4-hydroxylation with IC50 of 10.5 ŒºM and 8.2 ŒºM respectively.	Neuronal Signaling
RL-0074872	Labetalol HCl	Target Selective	Selleck	S4291	Adrenergic Receptor	Labetalol HCl is a dual antagonist for both selective alpha1-adrenergic and nonselective beta-adrenergic receptors, used in the treatment of high blood pressure.	GPCR & G Protein
RL-0074312	AP26113	Target Selective	Selleck	S7000	ALK	AP26113 is a potent ALK inhibitor with IC50 of 0.62 nM, demonstrated ability overcome Crizotinib resistance mediated by a L1196M mutation. Phase 1/2.	Protein Tyrosine Kinase
RL-0074880	GSK2656157	Target Selective	Selleck	S7033	PERK	GSK2656157 is an ATP-competitive and highly selective inhibitor of PERK with IC50 of 0.9 nM, 500-fold greater against a panel of 300 kinases.	Apoptosis
RL-0074623	LDK378, LDK378 (LDK-378)	Target Selective	Selleck	S7083	ALK	LDK378 is potent inhibitor against ALK with IC50 of 0.2 nM, shows 40- and 35-fold selectivity against IGF-1R and InsR, respectively. Phase 2.	Protein Tyrosine Kinase
RL-0074889	NLG919	Target Selective	Selleck	S7111	IDO	NLG919 is a potent IDO (indoleamine-(2,3)-dioxygenase) pathway inhibitor with Ki/EC50 of 7 nM/75 nM.	Metabolism
