# Supplementary material for: High-content synaptic phenotyping in human cellular models reveals a role for BET proteins in synapse assembly
Source: eLife. 2023 Apr 21;12:e80168. doi: 10.7554/eLife.80168 (PMC10121225; doi:10.7554/eLife.80168)
Supplement: Supplementary file 2. [file elife-80168-supp2.xlsx]

## Sheet: Primary Screen_Overall
pwr_less	pwr_greater	pwr_two.sided	effect_d	pooled_sigma	compound_mu	compound_s2	compound_sd	compound_n	control_mu	control_s2	control_sd	control_n
1	7.10988e-19	1	-0.183054	1.38749	-0.248341	2.1785	1.47597	1526	0.00564435	0.916322	0.957247	384

## Sheet: Primary Screen_ByCompound
compound	pwr_less	pwr_greater	pwr_two.sided	effect_d	pooled_sigma	compound_mu	compound_s2	compound_sd	compound_n	control_mu	control_s2	control_sd	control_n
RL-0074805	0.00302515	0.292992	0.196063	0.635194	0.954804	0.612131	0.0170944	0.130745	3	0.00564435	0.916322	0.957247	384
RL-0074806	0.019707	0.109373	0.0699514	0.239592	0.959436	0.235517	1.72402	1.31302	3	0.00564435	0.916322	0.957247	384
RL-0074807	0.383749	0.00137647	0.271147	-0.778963	0.955517	-0.738669	0.279247	0.528438	3	0.00564435	0.916322	0.957247	384
RL-0074808	0.0408288	0.0607439	0.0510629	0.0555958	0.956112	0.0588001	0.498156	0.705802	3	0.00564435	0.916322	0.957247	384
RL-0074809	0.0948032	0.0239665	0.0628059	-0.192321	0.955836	-0.178183	0.396546	0.629719	3	0.00564435	0.916322	0.957247	384
RL-0074350	0.847722	7.92901e-06	0.761646	-1.88908	0.956391	-1.80106	0.287306	0.53601	2	0.00564435	0.916322	0.957247	384
RL-0074810	0.999956	2.75077e-13	0.999845	-3.21437	0.955374	-3.06528	0.226452	0.475869	3	0.00564435	0.916322	0.957247	384
RL-0074811	0.99979	4.67001e-12	0.99934	-3.65678	0.956002	-3.49024	0.00107867	0.0328432	2	0.00564435	0.916322	0.957247	384
RL-0072221	0.954194	3.23451e-07	0.914944	-1.92362	0.955076	-1.83156	0.117197	0.342341	3	0.00564435	0.916322	0.957247	384
RL-0074300	0.997091	7.35034e-10	0.992713	-2.54193	0.963371	-2.44318	3.18041	1.78337	3	0.00564435	0.916322	0.957247	384
RL-0074812	0.216377	0.00611878	0.138152	-0.60837	0.957906	-0.577117	1.40073	1.18353	2	0.00564435	0.916322	0.957247	384
RL-0072155	0.999996	4.66162e-15	0.999983	-3.52375	0.956539	-3.36495	0.655199	0.809444	3	0.00564435	0.916322	0.957247	384
RL-0074985	0.407644	0.00112119	0.291973	-0.814783	0.954921	-0.772409	0.0599935	0.244936	3	0.00564435	0.916322	0.957247	384
RL-0074374	0.769035	2.84418e-05	0.662969	-1.3744	0.955971	-1.30824	0.446262	0.668028	3	0.00564435	0.916322	0.957247	384
RL-0074619	0.581884	0.00023577	0.456911	-1.069	0.955584	-1.01588	0.304017	0.551377	3	0.00564435	0.916322	0.957247	384
RL-0074813	0.0124176	0.147838	0.0920263	0.345891	0.955301	0.336075	0.199819	0.447011	3	0.00564435	0.916322	0.957247	384
RL-0074845	0.0358599	0.068268	0.0527938	0.0900888	0.958305	0.0919769	1.30631	1.14294	3	0.00564435	0.916322	0.957247	384
RL-0074846	0.575651	0.000250251	0.4506	-1.0598	0.971094	-1.02352	6.05633	2.46096	3	0.00564435	0.916322	0.957247	384
RL-0061396	0.92279	1.21569e-06	0.866282	-1.77186	0.95711	-1.69022	0.865646	0.930401	3	0.00564435	0.916322	0.957247	384
RL-0074847	0.586562	0.000225391	0.461667	-1.07593	0.954842	-1.0217	0.0309338	0.17588	3	0.00564435	0.916322	0.957247	384
RL-0018470	0.115907	0.0181296	0.0734141	-0.259319	0.955632	-0.24217	0.32169	0.567177	3	0.00564435	0.916322	0.957247	384
RL-0074848	0.0130686	0.143316	0.0892475	0.334468	0.954843	0.325009	0.0315353	0.177582	3	0.00564435	0.916322	0.957247	384
RL-0070177	2.49989e-08	0.984676	0.96759	2.19766	0.956665	2.10807	0.701665	0.837655	3	0.00564435	0.916322	0.957247	384
RL-0000677	0.205592	0.0067955	0.130478	-0.475184	0.955089	-0.448198	0.121938	0.349196	3	0.00564435	0.916322	0.957247	384
RL-0074966	0.976736	6.44949e-08	0.953078	-2.09891	0.954777	-1.99835	0.00709211	0.0842147	3	0.00564435	0.916322	0.957247	384
RL-0074967	0.26912	0.00374504	0.177432	-0.594312	0.955122	-0.561996	0.133882	0.365898	3	0.00564435	0.916322	0.957247	384
RL-0074968	0.406409	0.00113315	0.290886	-0.812944	0.955285	-0.770949	0.194054	0.440516	3	0.00564435	0.916322	0.957247	384
RL-0074969	0.327684	0.00223182	0.223994	-0.691975	0.956241	-0.656051	0.545519	0.738592	3	0.00564435	0.916322	0.957247	384
RL-0074970	0.321002	0.00236545	0.218537	-0.681247	0.955096	-0.645012	0.124534	0.352894	3	0.00564435	0.916322	0.957247	384
RL-0074971	0.694742	7.26279e-05	0.57702	-1.24372	0.95627	-1.18369	0.556264	0.745831	3	0.00564435	0.916322	0.957247	384
RL-0074972	0.212685	0.00634118	0.13551	-0.489427	0.956642	-0.462562	0.693206	0.83259	3	0.00564435	0.916322	0.957247	384
RL-0063176	0.434647	0.00088857	0.316023	-0.85465	0.956985	-0.812243	0.819705	0.905376	3	0.00564435	0.916322	0.957247	384
RL-0063050	0.0203553	0.106889	0.0686736	0.231871	0.955442	0.227183	0.251467	0.501465	3	0.00564435	0.916322	0.957247	384
RL-0074973	0.150338	0.0120753	0.0935802	-0.352108	0.954846	-0.330565	0.0324319	0.180089	3	0.00564435	0.916322	0.957247	384
RL-0063164	0.00691716	0.203787	0.129207	0.471512	0.956488	0.45664	0.636454	0.797781	3	0.00564435	0.916322	0.957247	384
RL-0074974	0.216765	0.0060959	0.138431	-0.497497	0.955228	-0.469578	0.172809	0.415703	3	0.00564435	0.916322	0.957247	384
RL-0063028	0.296785	0.00292531	0.199068	-0.641543	0.954986	-0.60702	0.0838568	0.28958	3	0.00564435	0.916322	0.957247	384
RL-0074975	0.376818	0.00146085	0.265187	-0.768456	0.955259	-0.72843	0.184276	0.429274	3	0.00564435	0.916322	0.957247	384
RL-0074976	0.363869	0.00163276	0.25415	-0.748661	0.955888	-0.709991	0.415541	0.644625	3	0.00564435	0.916322	0.957247	384
RL-0063082	0.210538	0.0064748	0.133981	-0.485147	0.955081	-0.45771	0.118967	0.344916	3	0.00564435	0.916322	0.957247	384
RL-0074977	0.0589012	0.0422059	0.050748	-0.0466436	0.956465	-0.0389687	0.62831	0.79266	3	0.00564435	0.916322	0.957247	384
RL-0061663	0.418677	0.00101972	0.301734	-0.831139	0.9552	-0.78826	0.162492	0.403103	3	0.00564435	0.916322	0.957247	384
RL-0064267	0.0852615	0.0274806	0.0586649	-0.158384	0.956744	-0.145888	0.730999	0.854985	3	0.00564435	0.916322	0.957247	384
RL-0074592	0.647093	0.000122615	0.524901	-1.1676	0.954971	-1.10938	0.0782409	0.279716	3	0.00564435	0.916322	0.957247	384
RL-0074582	0.305042	0.00272	0.205652	-0.655235	0.955595	-0.620495	0.307993	0.554971	3	0.00564435	0.916322	0.957247	384
RL-0074978	0.628552	0.000148601	0.505192	-1.13904	0.954759	-1.08186	0.000471068	0.0217041	3	0.00564435	0.916322	0.957247	384
RL-0074979	0.105268	0.0207943	0.0678518	-0.22676	0.955397	-0.211002	0.235158	0.484931	3	0.00564435	0.916322	0.957247	384
RL-0074980	0.484544	0.000575088	0.361903	-0.927284	0.959491	-0.884076	1.74417	1.32067	3	0.00564435	0.916322	0.957247	384
RL-0069727	0.994711	2.51661e-09	0.987495	-2.42557	0.955289	-2.31148	0.195327	0.441958	3	0.00564435	0.916322	0.957247	384
RL-0074981	0.576741	0.000247665	0.451701	-1.06141	0.955985	-1.00905	0.45124	0.671744	3	0.00564435	0.916322	0.957247	384
RL-0070422	0.0140467	0.137037	0.0854595	0.318193	0.956621	0.310034	0.685672	0.828053	3	0.00564435	0.916322	0.957247	384
RL-0074617	0.00353418	0.275554	0.182404	0.605498	0.955302	0.584077	0.200038	0.447256	3	0.00564435	0.916322	0.957247	384
RL-0074756	0.000668131	0.46747	0.345992	0.902527	0.955456	0.867969	0.256676	0.506632	3	0.00564435	0.916322	0.957247	384
RL-0070437	0.12785	0.0156557	0.0800788	-0.293432	0.955654	-0.274775	0.329683	0.574181	3	0.00564435	0.916322	0.957247	384
RL-0002904	0.00254419	0.312661	0.211777	0.667724	0.958273	0.645506	1.29447	1.13775	3	0.00564435	0.916322	0.957247	384
RL-0003377	0.0403043	0.0614711	0.0512	0.0590701	0.955501	0.0620859	0.273499	0.522972	3	0.00564435	0.916322	0.957247	384
RL-0061419	0.640065	0.00013197	0.517395	-1.15671	0.963665	-1.10904	3.2895	1.8137	3	0.00564435	0.916322	0.957247	384
RL-0069803	0.541544	0.000344357	0.416632	-1.00989	0.959415	-0.963258	1.71614	1.31002	3	0.00564435	0.916322	0.957247	384
RL-0070002	0.994687	2.5407e-09	0.987444	-2.42466	0.957867	-2.31686	1.14479	1.06995	3	0.00564435	0.916322	0.957247	384
RL-0074755	0.41222	0.00107796	0.29601	-0.821578	0.955902	-0.779704	0.420769	0.648667	3	0.00564435	0.916322	0.957247	384
RL-0074761	5.35831e-08	0.978537	0.956304	2.11846	0.956171	2.03125	0.519872	0.721022	3	0.00564435	0.916322	0.957247	384
RL-0074764	0.021513	0.102712	0.0665767	0.218587	0.955848	0.21458	0.400992	0.633239	3	0.00564435	0.916322	0.957247	384
RL-0074767	0.432752	0.000903227	0.314318	-0.85187	0.955135	-0.808007	0.138862	0.372641	3	0.00564435	0.916322	0.957247	384
RL-0070003	0.200606	0.00713791	0.126976	-0.464994	0.955722	-0.438761	0.35449	0.595391	3	0.00564435	0.916322	0.957247	384
RL-0074333	0.00280397	0.301587	0.20289	0.649526	0.955648	0.626363	0.327243	0.572052	3	0.00564435	0.916322	0.957247	384
RL-0074336	0.999565	1.80203e-11	0.998714	-2.87212	0.958927	-2.74851	1.53597	1.23934	3	0.00564435	0.916322	0.957247	384
RL-0074785	0.126239	0.0159621	0.0791571	-0.288966	0.957421	-0.271018	0.980413	0.990158	3	0.00564435	0.916322	0.957247	384
RL-0074790	0.291576	0.00306336	0.194944	-0.632815	0.957404	-0.600215	0.974183	0.987007	3	0.00564435	0.916322	0.957247	384
RL-0074795	0.0969591	0.0232607	0.0638061	-0.199635	0.956332	-0.185273	0.579295	0.761114	3	0.00564435	0.916322	0.957247	384
RL-0002880	0.0177214	0.117723	0.0744011	0.264662	0.959226	0.259516	1.64643	1.28313	3	0.00564435	0.916322	0.957247	384
RL-0001672	0.0973771	0.0231272	0.0640025	-0.20104	0.958299	-0.187012	1.30417	1.142	3	0.00564435	0.916322	0.957247	384
RL-0001928	0.298455	0.0028825	0.200395	-0.644325	0.956595	-0.610713	0.675884	0.822121	3	0.00564435	0.916322	0.957247	384
RL-0074710	0.864823	5.61677e-06	0.784401	-1.58604	0.955405	-1.50967	0.237832	0.48768	3	0.00564435	0.916322	0.957247	384
RL-0071598	0.346233	0.00190066	0.239325	-0.721308	0.956648	-0.684393	0.695422	0.83392	3	0.00564435	0.916322	0.957247	384
RL-0074789	0.358968	0.00170308	0.250006	-0.741107	0.957273	-0.703797	0.925973	0.962275	3	0.00564435	0.916322	0.957247	384
RL-0074794	0.0363707	0.0674236	0.0525675	0.0863691	0.955003	0.0881271	0.0901273	0.300212	3	0.00564435	0.916322	0.957247	384
RL-0001065	0.150079	0.0121102	0.0934188	-0.351468	0.955744	-0.330269	0.362649	0.602203	3	0.00564435	0.916322	0.957247	384
RL-0001210	0.290346	0.00309697	0.193973	-0.630743	0.955994	-0.597342	0.454644	0.674273	3	0.00564435	0.916322	0.957247	384
RL-0001610	0.231886	0.00527809	0.149413	-0.526661	0.955746	-0.49771	0.363629	0.603016	3	0.00564435	0.916322	0.957247	384
RL-0001822	0.977493	5.97611e-08	0.954429	-2.10697	0.955476	-2.00751	0.264294	0.514096	3	0.00564435	0.916322	0.957247	384
RL-0074814	0.0351381	0.0694926	0.0531349	0.0954203	0.955441	0.0968128	0.251093	0.501092	3	0.00564435	0.916322	0.957247	384
RL-0074818	0.114546	0.0184437	0.0726814	-0.255278	0.9582	-0.238963	1.26766	1.1259	3	0.00564435	0.916322	0.957247	384
RL-0001866	0.0364598	0.0672781	0.0525293	0.0857247	0.958448	0.0878071	1.35911	1.16581	3	0.00564435	0.916322	0.957247	384
RL-0074824	0.993082	4.43115e-09	0.984078	-2.37079	0.956357	-2.26167	0.588195	0.766939	3	0.00564435	0.916322	0.957247	384
RL-0074293	0.154633	0.0115148	0.0962767	-0.362628	0.955531	-0.340858	0.284434	0.533323	3	0.00564435	0.916322	0.957247	384
RL-0074833	0.123705	0.0164606	0.0777203	-0.281856	0.955057	-0.263544	0.10996	0.331603	3	0.00564435	0.916322	0.957247	384
RL-0074837	0.21336	0.0062998	0.135992	-0.490769	0.955379	-0.463226	0.22843	0.477944	3	0.00564435	0.916322	0.957247	384
RL-0074842	0.0821279	0.0287949	0.0574203	-0.14662	0.959087	-0.134977	1.59482	1.26286	3	0.00564435	0.916322	0.957247	384
RL-0074817	0.00700169	0.202555	0.128342	0.468995	0.95848	0.455166	1.37075	1.17079	3	0.00564435	0.916322	0.957247	384
RL-0074821	0.00122039	0.397772	0.283317	0.800054	0.955945	0.770452	0.436857	0.660951	3	0.00564435	0.916322	0.957247	384
RL-0074823	0.00981448	0.16945	0.105827	0.397513	0.956351	0.385806	0.586232	0.765658	3	0.00564435	0.916322	0.957247	384
RL-0069822	0.0024262	0.318094	0.216175	0.67655	0.955115	0.651828	0.131414	0.362511	3	0.00564435	0.916322	0.957247	384
RL-0074832	0.0454021	0.0549619	0.0502458	0.0267414	0.956267	0.0312163	0.55528	0.745171	3	0.00564435	0.916322	0.957247	384
RL-0074836	0.218634	0.00598731	0.139775	-0.501162	0.955016	-0.472973	0.0948426	0.307965	3	0.00564435	0.916322	0.957247	384
RL-0074305	0.370531	0.0015419	0.259812	-0.758873	0.955051	-0.719117	0.107666	0.328125	3	0.00564435	0.916322	0.957247	384
RL-0001162	0.0785784	0.0303958	0.05609	-0.13288	0.955881	-0.121373	0.413138	0.642758	3	0.00564435	0.916322	0.957247	384
RL-0071479	0.00109128	0.410791	0.294748	0.819458	0.956787	0.789691	0.746759	0.864152	3	0.00564435	0.916322	0.957247	384
RL-0061964	0.00105817	0.414374	0.297916	0.824772	0.955759	0.793928	0.368301	0.606878	3	0.00564435	0.916322	0.957247	384
RL-0001755	0.0762696	0.0315074	0.0552741	-0.123688	0.95602	-0.112604	0.464147	0.681283	3	0.00564435	0.916322	0.957247	384
RL-0074347	0.0033425	0.281779	0.187249	0.616199	0.954986	0.594106	0.0840472	0.289909	3	0.00564435	0.916322	0.957247	384
RL-0074828	0.998824	1.21405e-10	0.996801	-2.70583	0.955307	-2.57925	0.202064	0.449516	3	0.00564435	0.916322	0.957247	384
RL-0074701	0.543105	0.000339445	0.418165	-1.01216	0.958852	-0.964867	1.50825	1.22811	3	0.00564435	0.916322	0.957247	384
RL-0074838	0.848694	7.78184e-06	0.762925	-1.54482	0.955961	-1.47114	0.44246	0.665176	3	0.00564435	0.916322	0.957247	384
RL-0074843	0.0211194	0.104097	0.0672644	0.223034	0.957265	0.219147	0.922865	0.960659	3	0.00564435	0.916322	0.957247	384
RL-0000064	0.0431109	0.0577399	0.0505747	0.0408881	0.96009	0.0449006	1.96549	1.40196	3	0.00564435	0.916322	0.957247	384
RL-0061455	0.131006	0.0150772	0.0819041	-0.302072	0.955483	-0.28298	0.266556	0.516291	3	0.00564435	0.916322	0.957247	384
RL-0074356	0.0284164	0.083009	0.0577639	0.149962	0.958317	0.149355	1.31083	1.14491	3	0.00564435	0.916322	0.957247	384
RL-0074368	0.305728	0.00270366	0.206202	-0.656365	0.955854	-0.621745	0.403189	0.634971	3	0.00564435	0.916322	0.957247	384
RL-0074829	0.463518	0.000691601	0.342341	-0.896787	0.955314	-0.851069	0.204593	0.45232	3	0.00564435	0.916322	0.957247	384
RL-0000477	0.331074	0.00216708	0.226775	-0.697384	0.957433	-0.662054	0.984937	0.99244	3	0.00564435	0.916322	0.957247	384
RL-0074839	0.717019	5.58378e-05	0.602157	-1.28106	0.956832	-1.22011	0.763123	0.873569	3	0.00564435	0.916322	0.957247	384
RL-0074595	0.0814239	0.0291025	0.0571495	-0.143931	0.95832	-0.132288	1.31196	1.14541	3	0.00564435	0.916322	0.957247	384
RL-0002377	0.011112	0.157885	0.0983409	0.370466	0.959837	0.361231	1.87185	1.36816	3	0.00564435	0.916322	0.957247	384
RL-0074819	0.113048	0.0187981	0.0718814	-0.250787	0.957626	-0.234516	1.05604	1.02764	3	0.00564435	0.916322	0.957247	384
RL-0073962	0.29374	0.00300517	0.196654	-0.636449	0.954872	-0.602083	0.0418816	0.20465	3	0.00564435	0.916322	0.957247	384
RL-0074983	0.135038	0.0143778	0.0842718	-0.312905	0.956336	-0.293598	0.580561	0.761946	3	0.00564435	0.916322	0.957247	384
RL-0074830	0.12577	0.0160529	0.0788898	-0.287657	0.955068	-0.269088	0.114078	0.337754	3	0.00564435	0.916322	0.957247	384
RL-0074381	0.136094	0.0142017	0.084898	-0.315705	0.955824	-0.296114	0.392058	0.626145	3	0.00564435	0.916322	0.957247	384
RL-0074205	3.47397e-16	0.999999	0.999996	3.71039	0.955451	3.55074	0.254955	0.504931	3	0.00564435	0.916322	0.957247	384
RL-0062166	0.0265829	0.087528	0.0596029	0.166691	0.955646	0.164942	0.326658	0.57154	3	0.00564435	0.916322	0.957247	384
RL-0002504	0.00893547	0.178414	0.111774	0.417671	0.955162	0.404588	0.148538	0.385407	3	0.00564435	0.916322	0.957247	384
RL-0003393	0.264235	0.0039144	0.173681	-0.585728	0.954865	-0.553647	0.0394157	0.198534	3	0.00564435	0.916322	0.957247	384
RL-0063137	0.352728	0.0017971	0.244756	-0.731438	0.957017	-0.694354	0.831462	0.911846	3	0.00564435	0.916322	0.957247	384
RL-0074825	0.322149	0.00234192	0.219472	-0.683095	0.956015	-0.647405	0.46242	0.680015	3	0.00564435	0.916322	0.957247	384
RL-0070075	0.73997	4.19533e-05	0.628608	-1.32104	0.958476	-1.26054	1.36952	1.17026	3	0.00564435	0.916322	0.957247	384
RL-0074834	0.281883	0.0033394	0.18733	-0.616377	0.955027	-0.583012	0.0988495	0.314403	3	0.00564435	0.916322	0.957247	384
RL-0063124	0.276626	0.00350034	0.183236	-0.607348	0.957416	-0.575841	0.978347	0.989114	3	0.00564435	0.916322	0.957247	384
RL-0074601	0.000430692	0.516978	0.392736	0.974235	0.960016	0.940926	1.93835	1.39225	3	0.00564435	0.916322	0.957247	384
RL-0074815	0.490214	0.000546983	0.367234	-0.935493	0.954774	-0.887539	0.00581472	0.0762543	3	0.00564435	0.916322	0.957247	384
RL-0074820	0.163579	0.0104482	0.101999	-0.383937	0.955282	-0.361123	0.192846	0.439143	3	0.00564435	0.916322	0.957247	384
RL-0074822	0.876684	4.32809e-06	0.800515	-1.61856	0.955463	-1.54083	0.259418	0.509331	3	0.00564435	0.916322	0.957247	384
RL-0074826	0.548592	0.000322664	0.423574	-1.02015	0.955053	-0.968656	0.108396	0.329235	3	0.00564435	0.916322	0.957247	384
RL-0074375	1	2.37074e-21	1	-5.49416	0.958548	-5.26077	1.87353	1.36877	2	0.00564435	0.916322	0.957247	384
RL-0063162	0.960024	2.31956e-07	0.924477	-1.96057	0.954802	-1.86631	0.016185	0.12722	3	0.00564435	0.916322	0.957247	384
RL-0074840	0.493525	0.000531168	0.370359	-0.940285	0.954968	-0.892298	0.0774832	0.278358	3	0.00564435	0.916322	0.957247	384
RL-0074844	0.146153	0.0126553	0.090986	-0.341662	0.957592	-0.321529	1.04326	1.0214	3	0.00564435	0.916322	0.957247	384
RL-0074816	0.559071	0.000292666	0.43397	-1.03546	0.957056	-0.985347	0.845667	0.919602	3	0.00564435	0.916322	0.957247	384
RL-0074982	0.389863	0.00130611	0.276435	-0.788185	0.956351	-0.748137	0.586146	0.765602	3	0.00564435	0.916322	0.957247	384
RL-0063418	0.684383	8.1723e-05	0.565502	-1.22678	0.956109	-1.16729	0.497155	0.705092	3	0.00564435	0.916322	0.957247	384
RL-0074827	0.960325	2.27735e-07	0.924976	-1.9626	0.957164	-1.87289	0.885503	0.941012	3	0.00564435	0.916322	0.957247	384
RL-0074831	0.387517	0.00133266	0.274403	-0.784653	0.955554	-0.744133	0.292722	0.541038	3	0.00564435	0.916322	0.957247	384
RL-0074835	0.283963	0.00327795	0.188958	-0.619927	0.957451	-0.587905	0.991359	0.99567	3	0.00564435	0.916322	0.957247	384
RL-0074841	0.409013	0.00110808	0.293179	-0.816818	0.956126	-0.775336	0.503298	0.709435	3	0.00564435	0.916322	0.957247	384
RL-0002056	1	1.18002e-20	1	-4.38775	0.982524	-4.30542	10.355	3.21791	3	0.00564435	0.916322	0.957247	384
RL-0074849	0.000392367	0.527273	0.402692	0.989157	0.955041	0.95033	0.104123	0.322681	3	0.00564435	0.916322	0.957247	384
RL-0074850	0.000749177	0.454339	0.333906	0.883432	0.956827	0.850935	0.761372	0.872567	3	0.00564435	0.916322	0.957247	384
RL-0074851	0.00934366	0.174123	0.108912	0.408104	0.95543	0.395559	0.247164	0.497156	3	0.00564435	0.916322	0.957247	384
RL-0061394	0.999948	3.71682e-13	0.999819	-3.19064	0.956226	-3.04533	0.540157	0.734953	3	0.00564435	0.916322	0.957247	384
RL-0074852	0.00351682	0.276102	0.182829	0.606445	0.954764	0.584656	0.0021305	0.0461574	3	0.00564435	0.916322	0.957247	384
RL-0063070	0.00183464	0.35033	0.242747	0.727706	0.956827	0.701934	0.761593	0.872693	3	0.00564435	0.916322	0.957247	384
RL-0003340	0.0786659	0.0303548	0.0561217	-0.133224	0.95577	-0.121688	0.372395	0.610241	3	0.00564435	0.916322	0.957247	384
RL-0063151	0.0168071	0.122002	0.076765	0.277022	0.95596	0.270466	0.442377	0.665114	3	0.00564435	0.916322	0.957247	384
RL-0070155	0.462606	0.000697129	0.3415	-0.895461	0.955875	-0.850304	0.41086	0.640984	3	0.00564435	0.916322	0.957247	384
RL-0070038	0.528348	0.000388549	0.403737	-0.990717	0.957349	-0.942818	0.95384	0.976647	3	0.00564435	0.916322	0.957247	384
RL-0061462	0.555484	0.00030264	0.430402	-1.03021	0.958354	-0.981666	1.32459	1.15091	3	0.00564435	0.916322	0.957247	384
RL-0074853	0.770433	2.78907e-05	0.664648	-1.37705	0.957268	-1.31257	0.924055	0.961278	3	0.00564435	0.916322	0.957247	384
RL-0074854	0.457568	0.000728424	0.336866	-0.888133	0.955749	-0.843187	0.364458	0.603704	3	0.00564435	0.916322	0.957247	384
RL-0064101	0.541716	0.000343813	0.4168	-1.01014	0.956212	-0.960263	0.53505	0.731471	3	0.00564435	0.916322	0.957247	384
RL-0074705	0.328791	0.00221047	0.224901	-0.693743	0.955929	-0.657525	0.430766	0.656328	3	0.00564435	0.916322	0.957247	384
RL-0000789	0.0520945	0.0479732	0.0500457	-0.0115342	0.955508	-0.00537665	0.275935	0.525295	3	0.00564435	0.916322	0.957247	384
RL-0074890	0.277821	0.003463	0.184165	-0.609409	0.959021	-0.578792	1.57057	1.25322	3	0.00564435	0.916322	0.957247	384
RL-0074891	0.0221666	0.100487	0.0654886	0.211353	0.95557	0.207607	0.298713	0.546547	3	0.00564435	0.916322	0.957247	384
RL-0074892	0.759103	3.26038e-05	0.651115	-1.35578	0.955773	-1.29017	0.373465	0.611118	3	0.00564435	0.916322	0.957247	384
RL-0074893	0.540278	0.000348393	0.415388	-1.00805	0.956516	-0.958568	0.647049	0.804393	3	0.00564435	0.916322	0.957247	384
RL-0074894	0.15525	0.011437	0.096667	-0.364123	0.954822	-0.342029	0.0237122	0.153988	3	0.00564435	0.916322	0.957247	384
RL-0074895	0.0377745	0.0651919	0.0520063	0.0763624	0.957261	0.078743	0.921198	0.959791	3	0.00564435	0.916322	0.957247	384
RL-0028269	0.437932	0.000863694	0.318986	-0.859467	0.954855	-0.815022	0.0357144	0.188982	3	0.00564435	0.916322	0.957247	384
RL-0074896	0.0184148	0.11467	0.0727478	0.255647	0.955456	0.249904	0.256642	0.506598	3	0.00564435	0.916322	0.957247	384
RL-0074855	0.169036	0.00985759	0.105555	-0.396565	0.958283	-0.374377	1.29817	1.13937	3	0.00564435	0.916322	0.957247	384
RL-0000909	0.0540044	0.046236	0.0501624	-0.021735	0.95598	-0.0151339	0.449481	0.670433	3	0.00564435	0.916322	0.957247	384
RL-0003037	0.21806	0.00602039	0.139362	-0.500039	0.958555	-0.473671	1.39852	1.18259	3	0.00564435	0.916322	0.957247	384
RL-0001183	0.184521	0.00839128	0.115892	-0.43104	0.956199	-0.406516	0.530244	0.728179	3	0.00564435	0.916322	0.957247	384
RL-0069922	0.337862	0.00204329	0.232372	-0.708147	0.955814	-0.671213	0.388484	0.623285	3	0.00564435	0.916322	0.957247	384
RL-0061336	0.00106409	0.413726	0.297342	0.823811	0.956264	0.793425	0.554242	0.744474	3	0.00564435	0.916322	0.957247	384
RL-0074881	0.0363353	0.0674816	0.0525828	0.0866257	0.954764	0.0883515	0.00245404	0.0495382	3	0.00564435	0.916322	0.957247	384
RL-0074886	0.112455	0.0189409	0.0715668	-0.248998	0.960465	-0.233509	2.10401	1.45052	3	0.00564435	0.916322	0.957247	384
RL-0070034	0.288585	0.00314581	0.192586	-0.62777	0.955087	-0.593931	0.121067	0.347947	3	0.00564435	0.916322	0.957247	384
RL-0003373	0.205244	0.00681875	0.130233	-0.474477	0.954775	-0.447375	0.00639576	0.0799735	3	0.00564435	0.916322	0.957247	384
RL-0074866	0.460947	0.000707294	0.339972	-0.893048	0.956004	-0.848113	0.45829	0.676971	3	0.00564435	0.916322	0.957247	384
RL-0074872	0.379936	0.00142226	0.267864	-0.773191	0.954833	-0.732623	0.0275426	0.16596	3	0.00564435	0.916322	0.957247	384
RL-0074312	0.00716503	0.200223	0.126709	0.464206	0.95479	0.448863	0.0119114	0.109139	3	0.00564435	0.916322	0.957247	384
RL-0074880	0.393362	0.00126747	0.279474	-0.793444	0.955429	-0.752436	0.246966	0.496956	3	0.00564435	0.916322	0.957247	384
RL-0074623	0.0286678	0.0824218	0.0575344	0.147738	0.956416	0.146943	0.609959	0.780999	3	0.00564435	0.916322	0.957247	384
RL-0074889	0.0275411	0.0851127	0.0586044	0.157833	0.95493	0.156363	0.0633718	0.251738	3	0.00564435	0.916322	0.957247	384
DMSO	0.361122	0.00167179	0.251825	-0.263196	0.953072	-0.245201	0.775534	0.880644	24	0.00564435	0.916322	0.957247	384
RL-0069753	0.0501964	0.0498043	0.0500004	-0.00109752	0.955562	0.00459561	0.295812	0.543886	3	0.00564435	0.916322	0.957247	384
RL-0061452	0.0108584	0.160008	0.0996986	0.375526	0.955709	0.364538	0.349743	0.59139	3	0.00564435	0.916322	0.957247	384
RL-0069804	0.0929123	0.0246104	0.061947	-0.185804	0.960195	-0.172763	2.0042	1.4157	3	0.00564435	0.916322	0.957247	384
RL-0070144	0.333068	0.00212992	0.228416	-0.700555	0.955492	-0.663731	0.270164	0.519773	3	0.00564435	0.916322	0.957247	384
RL-0074757	0.0131368	0.142858	0.0889686	0.333298	0.955356	0.324063	0.220124	0.469174	3	0.00564435	0.916322	0.957247	384
RL-0074762	0.493491	0.000531327	0.370327	-0.940236	0.955071	-0.892348	0.115232	0.339459	3	0.00564435	0.916322	0.957247	384
RL-0000046	0.103453	0.021301	0.066944	-0.220974	0.956034	-0.205614	0.469539	0.685229	3	0.00564435	0.916322	0.957247	384
RL-0074768	0.131105	0.0150594	0.081962	-0.302342	0.956907	-0.283669	0.7909	0.889326	3	0.00564435	0.916322	0.957247	384
RL-0070037	4.29473e-05	0.73814	0.626478	1.31779	0.954808	1.26388	0.0185917	0.136351	3	0.00564435	0.916322	0.957247	384
RL-0069759	5.69567e-09	0.992216	0.982301	2.3462	0.960875	2.26005	2.25572	1.50191	3	0.00564435	0.916322	0.957247	384
RL-0074752	0.00269229	0.306208	0.206586	0.657155	0.957842	0.635095	1.1356	1.06564	3	0.00564435	0.916322	0.957247	384
RL-0069709	0.119114	0.0174171	0.0751637	-0.268715	0.958563	-0.251936	1.40154	1.18386	3	0.00564435	0.916322	0.957247	384
RL-0070152	1	1.26088e-17	0.999999	-3.93867	0.958932	-3.77127	1.53762	1.24001	3	0.00564435	0.916322	0.957247	384
RL-0041158	0.0263881	0.0880342	0.0598165	0.168525	0.955821	0.166724	0.39106	0.625348	3	0.00564435	0.916322	0.957247	384
RL-0074765	0.374855	0.00148567	0.263506	-0.76547	0.954832	-0.725251	0.0274384	0.165645	3	0.00564435	0.916322	0.957247	384
RL-0074769	0.00228613	0.324919	0.221731	0.687547	0.957378	0.663886	0.964366	0.982021	3	0.00564435	0.916322	0.957247	384
RL-0062633	0.0199293	0.108509	0.0695043	0.23692	0.956827	0.232336	0.761292	0.87252	3	0.00564435	0.916322	0.957247	384
RL-0069801	0.631481	0.000144209	0.508286	-1.14352	0.957885	-1.08972	1.15152	1.07309	3	0.00564435	0.916322	0.957247	384
RL-0073761	0.131909	0.0149167	0.0824312	-0.304519	0.956363	-0.285586	0.590481	0.768428	3	0.00564435	0.916322	0.957247	384
RL-0074753	0.298036	0.00289317	0.200062	-0.643628	0.954768	-0.608871	0.0039377	0.0627511	3	0.00564435	0.916322	0.957247	384
RL-0074758	0.112505	0.0189289	0.0715932	-0.249149	0.955236	-0.232351	0.1757	0.419165	3	0.00564435	0.916322	0.957247	384
RL-0074763	0.786534	2.21184e-05	0.684158	-1.40833	0.954889	-1.33916	0.0484245	0.220056	3	0.00564435	0.916322	0.957247	384
RL-0074766	0.726214	4.98932e-05	0.612686	-1.29688	0.955252	-1.2332	0.181674	0.426232	3	0.00564435	0.916322	0.957247	384
RL-0001955	0.874529	4.54475e-06	0.797566	-1.61249	0.954782	-1.53393	0.00877386	0.0936689	3	0.00564435	0.916322	0.957247	384
RL-0069756	4.08811e-16	0.999999	0.999996	3.6989	0.956917	3.54518	0.794724	0.891473	3	0.00564435	0.916322	0.957247	384
RL-0074324	0.964204	1.77703e-07	0.931439	-1.98987	0.955392	-1.89546	0.233087	0.482791	3	0.00564435	0.916322	0.957247	384
RL-0001204	0.0607678	0.0408114	0.0510673	-0.0557106	0.962721	-0.0479894	2.93927	1.71443	3	0.00564435	0.916322	0.957247	384
RL-0074325	0.905563	2.07598e-06	0.841057	-1.70825	0.957065	-1.62926	0.848988	0.921406	3	0.00564435	0.916322	0.957247	384
RL-0064662	0.262136	0.0039898	0.172076	-0.582014	0.961717	-0.554088	2.56729	1.60228	3	0.00564435	0.916322	0.957247	384
RL-0061957	0.308466	0.00263944	0.208399	-0.660865	0.958708	-0.627932	1.45514	1.20629	3	0.00564435	0.916322	0.957247	384
RL-0000945	0.390164	0.00130274	0.276696	-0.788638	0.956495	-0.748685	0.639333	0.799583	3	0.00564435	0.916322	0.957247	384
RL-0074770	0.603976	0.000190173	0.479535	-1.10188	0.954909	-1.04655	0.0557421	0.236098	3	0.00564435	0.916322	0.957247	384
RL-0074749	1	3.2869e-17	0.999999	-4.7444	0.956861	-4.53409	0.632411	0.795242	2	0.00564435	0.916322	0.957247	384
RL-0074750	0.00776033	0.192229	0.121162	0.447529	0.955555	0.433283	0.293231	0.541508	3	0.00564435	0.916322	0.957247	384
RL-0063118	0.927855	1.01857e-06	0.873872	-1.79259	0.95489	-1.70608	0.0487056	0.220694	3	0.00564435	0.916322	0.957247	384
RL-0070430	0.740463	4.16882e-05	0.629184	-1.32192	0.955422	-1.25734	0.244111	0.494076	3	0.00564435	0.916322	0.957247	384
RL-0074759	0.999972	1.25114e-13	0.999898	-3.27585	0.955037	-3.12291	0.102777	0.320588	3	0.00564435	0.916322	0.957247	384
RL-0062621	0.000565443	0.48646	0.363702	0.930058	0.955889	0.894677	0.416039	0.645011	3	0.00564435	0.916322	0.957247	384
RL-0000020	0.229238	0.00541169	0.147473	-0.521634	0.957241	-0.493685	0.914162	0.956118	3	0.00564435	0.916322	0.957247	384
RL-0001819	0.308145	0.00264688	0.208141	-0.660338	0.955297	-0.625174	0.198176	0.44517	3	0.00564435	0.916322	0.957247	384
RL-0005673	0.000951768	0.426684	0.308874	0.842949	0.954778	0.810473	0.00731951	0.0855541	3	0.00564435	0.916322	0.957247	384
RL-0074751	0.0117017	0.153172	0.0953556	0.359071	0.955082	0.348587	0.119169	0.345209	3	0.00564435	0.916322	0.957247	384
RL-0069781	0.244001	0.00471283	0.158382	-0.54927	0.956199	-0.519567	0.530196	0.728146	3	0.00564435	0.916322	0.957247	384
RL-0074760	0.29576	0.00295194	0.198254	-0.63983	0.955287	-0.605577	0.194771	0.441328	3	0.00564435	0.916322	0.957247	384
RL-0062619	0.186563	0.00821831	0.11728	-0.435449	0.955004	-0.410211	0.090521	0.300867	3	0.00564435	0.916322	0.957247	384
RL-0074229	0.00105494	0.414729	0.298231	0.825298	0.958041	0.796314	1.20891	1.0995	3	0.00564435	0.916322	0.957247	384
RL-0071476	0.112126	0.0190207	0.0713929	-0.248003	0.955826	-0.231404	0.392967	0.626871	3	0.00564435	0.916322	0.957247	384
RL-0074568	0.00146741	0.376296	0.26474	0.767663	0.957169	0.740427	0.887416	0.942028	3	0.00564435	0.916322	0.957247	384
RL-0074337	0.0238654	0.0951065	0.0629453	0.193357	0.956253	0.190543	0.550041	0.741647	3	0.00564435	0.916322	0.957247	384
RL-0074786	0.673193	9.25775e-05	0.55318	-1.20874	0.955231	-1.14898	0.173859	0.416964	3	0.00564435	0.916322	0.957247	384
RL-0074791	0.00650325	0.210088	0.133661	0.484246	0.956553	0.468851	0.660468	0.812692	3	0.00564435	0.916322	0.957247	384
RL-0002712	0.110768	0.0193552	0.0706784	-0.243872	0.954822	-0.22721	0.0236575	0.15381	3	0.00564435	0.916322	0.957247	384
RL-0001881	0.70351	6.55906e-05	0.586853	-1.25826	0.956018	-1.19728	0.463732	0.680979	3	0.00564435	0.916322	0.957247	384
RL-0069810	0.00329251	0.283466	0.188569	0.61908	0.954821	0.596755	0.0233412	0.152778	3	0.00564435	0.916322	0.957247	384
RL-0000299	0.561438	0.000286246	0.436331	-1.03892	0.957129	-0.988739	0.872594	0.934127	3	0.00564435	0.916322	0.957247	384
RL-0000470	0.0246246	0.0928712	0.0619285	0.185661	0.955375	0.18302	0.226919	0.47636	3	0.00564435	0.916322	0.957247	384
RL-0074784	0.0394299	0.062716	0.0514507	0.0649446	0.956404	0.0677576	0.605486	0.77813	3	0.00564435	0.916322	0.957247	384
RL-0062164	0.0272853	0.0857456	0.0588627	0.160172	0.95507	0.15862	0.114825	0.338858	3	0.00564435	0.916322	0.957247	384
RL-0074346	0.655343	0.00011235	0.533772	-1.18047	0.955748	-1.12259	0.364291	0.603565	3	0.00564435	0.916322	0.957247	384
RL-0002931	0.5984	0.000200888	0.473786	-1.09354	0.954795	-1.03846	0.0138055	0.117497	3	0.00564435	0.916322	0.957247	384
RL-0000258	0.412822	0.00107239	0.296542	-0.822471	0.956048	-0.780677	0.474621	0.688928	3	0.00564435	0.916322	0.957247	384
RL-0074797	0.750112	3.67671e-05	0.640486	-1.33928	0.956288	-1.27509	0.563124	0.750416	3	0.00564435	0.916322	0.957247	384
RL-0000853	0.915167	1.55829e-06	0.85501	-1.74252	0.959681	-1.66662	1.81448	1.34703	3	0.00564435	0.916322	0.957247	384
RL-0074781	0.116373	0.0180236	0.0736665	-0.260697	0.955541	-0.243462	0.287863	0.536529	3	0.00564435	0.916322	0.957247	384
RL-0061983	0.250429	0.00444095	0.163201	-0.561019	0.959779	-0.53281	1.85042	1.3603	3	0.00564435	0.916322	0.957247	384
RL-0069941	0.33511	0.00209256	0.230099	-0.703794	0.955744	-0.667003	0.36264	0.602196	3	0.00564435	0.916322	0.957247	384
RL-0074792	0.415919	0.00104421	0.299285	-0.827059	0.958269	-0.786901	1.29308	1.13714	3	0.00564435	0.916322	0.957247	384
RL-0000101	0.405751	0.00113957	0.290308	-0.811965	0.960495	-0.774244	2.11514	1.45435	3	0.00564435	0.916322	0.957247	384
RL-0061967	0.303479	0.00275766	0.204401	-0.652655	0.958303	-0.619797	1.30567	1.14266	3	0.00564435	0.916322	0.957247	384
RL-0069714	0.345432	0.00191384	0.238657	-0.720054	0.955956	-0.682696	0.440678	0.663836	3	0.00564435	0.916322	0.957247	384
RL-0000300	0.89946	2.45982e-06	0.832319	-1.68779	0.955756	-1.60747	0.36713	0.605913	3	0.00564435	0.916322	0.957247	384
RL-0074782	0.0623969	0.0396512	0.0513846	-0.0634475	0.955217	-0.0549618	0.168952	0.411038	3	0.00564435	0.916322	0.957247	384
RL-0074611	9.67399e-05	0.669189	0.5488	1.20235	0.96281	1.16328	2.97221	1.72401	3	0.00564435	0.916322	0.957247	384
RL-0062985	0.0146945	0.133181	0.0831765	0.307944	0.959893	0.301238	1.89283	1.3758	3	0.00564435	0.916322	0.957247	384
RL-0062541	0.0132131	0.142351	0.0886597	0.331998	0.955797	0.322967	0.382216	0.618236	3	0.00564435	0.916322	0.957247	384
RL-0062027	0.543845	0.000337136	0.418893	-1.01324	0.955916	-0.962926	0.426205	0.652844	3	0.00564435	0.916322	0.957247	384
RL-0000504	0.687528	7.88681e-05	0.568988	-1.2319	0.960761	-1.17792	2.21374	1.48786	3	0.00564435	0.916322	0.957247	384
RL-0001480	0.177148	0.00905358	0.110927	-0.414864	0.955771	-0.390871	0.372718	0.610506	3	0.00564435	0.916322	0.957247	384
RL-0002051	4.21616e-06	0.877828	0.802084	1.62181	0.956377	1.5567	0.595794	0.771877	3	0.00564435	0.916322	0.957247	384
RL-0070175	2.50244e-07	0.958755	0.922386	1.95218	0.957883	1.8756	1.15076	1.07273	3	0.00564435	0.916322	0.957247	384
RL-0070156	0.021616	0.102355	0.066401	0.217435	0.958461	0.214048	1.36404	1.16792	3	0.00564435	0.916322	0.957247	384
RL-0074787	0.00132633	0.388073	0.274884	0.785489	0.954827	0.755651	0.025605	0.160016	3	0.00564435	0.916322	0.957247	384
RL-0074793	0.0653765	0.0376553	0.0520507	-0.0772001	0.958552	-0.0683559	1.39746	1.18214	3	0.00564435	0.916322	0.957247	384
RL-0001912	0.0869691	0.0268004	0.0593688	-0.164658	0.96734	-0.153636	4.65544	2.15765	3	0.00564435	0.916322	0.957247	384
RL-0002642	0.972819	9.25786e-08	0.946174	-2.06045	0.959342	-1.97103	1.68917	1.29968	3	0.00564435	0.916322	0.957247	384
RL-0074798	0.000212128	0.592822	0.468061	1.08522	0.955359	1.04242	0.221137	0.470252	3	0.00564435	0.916322	0.957247	384
RL-0074799	0.306517	0.00268497	0.206835	-0.657664	0.95728	-0.623924	0.928237	0.963451	3	0.00564435	0.916322	0.957247	384
RL-0074783	0.749313	3.71563e-05	0.639546	-1.33783	0.960282	-1.27905	2.03662	1.4271	3	0.00564435	0.916322	0.957247	384
RL-0070043	0.0036005	0.273486	0.180801	0.601916	0.954875	0.580399	0.0431187	0.20765	3	0.00564435	0.916322	0.957247	384
RL-0074788	0.100322	0.0222161	0.0654087	-0.210812	0.957678	-0.196245	1.0752	1.03692	3	0.00564435	0.916322	0.957247	384
RL-0062703	0.0285702	0.082649	0.0576229	0.1486	0.95542	0.147619	0.243461	0.493417	3	0.00564435	0.916322	0.957247	384
RL-0062069	0.4736	0.000633209	0.351679	-0.911422	0.956342	-0.865987	0.582995	0.763541	3	0.00564435	0.916322	0.957247	384
RL-0074796	5.461e-06	0.866146	0.786184	1.58957	0.959471	1.53079	1.73666	1.31783	3	0.00564435	0.916322	0.957247	384
RL-0000494	0.0180412	0.116296	0.0736244	0.260468	0.954941	0.254376	0.0672775	0.259379	3	0.00564435	0.916322	0.957247	384
RL-0074800	0.342139	0.00196906	0.235918	-0.714888	0.957848	-0.679109	1.13764	1.0666	3	0.00564435	0.916322	0.957247	384
RL-0074856	0.106482	0.0204644	0.0684662	-0.230592	0.956927	-0.215015	0.798286	0.893469	3	0.00564435	0.916322	0.957247	384
RL-0074501	0.00198973	0.340931	0.234915	0.712988	0.957585	0.688391	1.04086	1.02022	3	0.00564435	0.916322	0.957247	384
RL-0061990	0.0182695	0.115297	0.073085	0.257513	0.961604	0.253269	2.52542	1.58916	3	0.00564435	0.916322	0.957247	384
RL-0074986	0.112488	0.0189328	0.0715846	-0.249099	0.956739	-0.232679	0.728875	0.853742	3	0.00564435	0.916322	0.957247	384
RL-0061348	0.105416	0.0207536	0.0679264	-0.227229	0.957901	-0.212019	1.15749	1.07587	3	0.00564435	0.916322	0.957247	384
RL-0074877	0.0746467	0.0323246	0.0547256	-0.117099	0.959562	-0.10672	1.77059	1.33064	3	0.00564435	0.916322	0.957247	384
RL-0074882	0.00729766	0.198375	0.125419	0.460387	0.954896	0.445266	0.0508177	0.225428	3	0.00564435	0.916322	0.957247	384
RL-0062501	0.101393	0.0218973	0.065929	-0.214311	0.958354	-0.199741	1.32442	1.15083	3	0.00564435	0.916322	0.957247	384
RL-0074857	0.043943	0.056705	0.0504377	0.0356819	0.956424	0.0397714	0.61314	0.783032	3	0.00564435	0.916322	0.957247	384
RL-0074860	0.000736124	0.45636	0.335758	0.886374	0.956824	0.853748	0.76026	0.871929	3	0.00564435	0.916322	0.957247	384
RL-0074863	0.0759623	0.0316598	0.0551686	-0.122449	0.955122	-0.111309	0.133972	0.366022	3	0.00564435	0.916322	0.957247	384
RL-0074867	0.0897478	0.0257435	0.0605503	-0.174674	0.955115	-0.161189	0.131425	0.362526	3	0.00564435	0.916322	0.957247	384
RL-0074873	0.0012918	0.391146	0.277548	0.790116	0.956174	0.761133	0.521169	0.72192	3	0.00564435	0.916322	0.957247	384
RL-0074596	0.0137903	0.138627	0.0864108	0.322362	0.95557	0.313684	0.298749	0.546579	3	0.00564435	0.916322	0.957247	384
RL-0074883	0.00182652	0.350845	0.243178	0.728508	0.95612	0.702185	0.501242	0.707985	3	0.00564435	0.916322	0.957247	384
RL-0070761	0.417422	0.00103079	0.300619	-0.829284	0.956096	-0.78723	0.492309	0.701647	3	0.00564435	0.916322	0.957247	384
RL-0074858	0.0536878	0.0465171	0.0501384	-0.0200639	0.956131	-0.0135394	0.505196	0.710772	3	0.00564435	0.916322	0.957247	384
RL-0074861	0.273678	0.00359427	0.180951	-0.60225	0.954774	-0.569368	0.00589774	0.0767968	3	0.00564435	0.916322	0.957247	384
RL-0000937	0.8775	4.24799e-06	0.801635	-1.62087	0.955198	-1.54261	0.161913	0.402384	3	0.00564435	0.916322	0.957247	384
RL-0074868	0.0176863	0.117882	0.0744878	0.265126	0.957133	0.259406	0.874069	0.934917	3	0.00564435	0.916322	0.957247	384
RL-0074874	0.257456	0.00416372	0.168512	-0.573681	0.955965	-0.542774	0.444076	0.66639	3	0.00564435	0.916322	0.957247	384
RL-0074878	0.00018138	0.608758	0.484487	1.10905	0.95819	1.06833	1.26383	1.1242	3	0.00564435	0.916322	0.957247	384
RL-0074884	0.999993	1.14798e-14	0.999972	-3.45718	0.95645	-3.30097	0.622464	0.788964	3	0.00564435	0.916322	0.957247	384
RL-0074887	1.21229e-08	0.988957	0.975797	2.27115	0.955592	2.17594	0.30668	0.553787	3	0.00564435	0.916322	0.957247	384
RL-0063020	0.16264	0.0105542	0.101392	-0.381736	0.955554	-0.359125	0.292973	0.54127	3	0.00564435	0.916322	0.957247	384
RL-0074862	0.0471154	0.0530237	0.0500939	0.0165332	0.957951	0.0214824	1.17571	1.0843	3	0.00564435	0.916322	0.957247	384
RL-0000862	0.00011257	0.65516	0.533574	1.18019	0.956278	1.13423	0.559358	0.747902	3	0.00564435	0.916322	0.957247	384
RL-0074869	0.31134	0.00257377	0.210713	-0.665569	0.954872	-0.629889	0.0419863	0.204906	3	0.00564435	0.916322	0.957247	384
RL-0074875	0.00147975	0.375321	0.263904	0.766178	0.955733	0.737906	0.358716	0.598929	3	0.00564435	0.916322	0.957247	384
RL-0062697	0.000509531	0.498206	0.374792	0.94706	0.959836	0.914667	1.87173	1.36811	3	0.00564435	0.916322	0.957247	384
RL-0003139	0.146576	0.0125951	0.0912465	-0.342726	0.955089	-0.32169	0.121899	0.34914	3	0.00564435	0.916322	0.957247	384
RL-0074888	0.59039	0.000217196	0.465573	-1.08161	0.955791	-1.02815	0.379971	0.616418	3	0.00564435	0.916322	0.957247	384
RL-0063179	0.028602	0.0825749	0.057594	0.148319	0.957049	0.147593	0.843235	0.918278	3	0.00564435	0.916322	0.957247	384
RL-0074984	0.00477098	0.24268	0.157398	0.546836	0.96041	0.530831	2.08373	1.44351	3	0.00564435	0.916322	0.957247	384
RL-0074864	0.0150721	0.131034	0.0819207	0.302149	0.954797	0.294136	0.0143642	0.119851	3	0.00564435	0.916322	0.957247	384
RL-0074870	0.285142	0.00324368	0.189882	-0.621934	0.954933	-0.58826	0.0642709	0.253517	3	0.00564435	0.916322	0.957247	384
RL-0074876	0.0120434	0.150576	0.0937287	0.352696	0.954927	0.342443	0.0621505	0.2493	3	0.00564435	0.916322	0.957247	384
RL-0001854	0.445764	0.000807077	0.326083	-0.870923	0.954776	-0.825892	0.0067057	0.0818884	3	0.00564435	0.916322	0.957247	384
RL-0063092	0.379293	0.00143013	0.267311	-0.772215	0.954833	-0.731692	0.0276739	0.166355	3	0.00564435	0.916322	0.957247	384
RL-0074594	0.121568	0.0168969	0.076523	-0.275783	0.96198	-0.259654	2.66468	1.63239	3	0.00564435	0.916322	0.957247	384
RL-0074859	0.0755591	0.0318614	0.0550313	-0.120817	0.958272	-0.110131	1.29401	1.13755	3	0.00564435	0.916322	0.957247	384
RL-0062545	0.00749716	0.19567	0.123539	0.454757	0.955547	0.440186	0.290287	0.538783	3	0.00564435	0.916322	0.957247	384
RL-0074865	0.0162483	0.124772	0.078323	0.284861	0.955235	0.277753	0.17541	0.41882	3	0.00564435	0.916322	0.957247	384
RL-0074871	0.0468537	0.0533125	0.0501123	0.018073	0.957917	0.0229568	1.1631	1.07847	3	0.00564435	0.916322	0.957247	384
RL-0069846	0.0530172	0.0471213	0.0500935	-0.0164985	0.957537	-0.0101536	1.02324	1.01155	3	0.00564435	0.916322	0.957247	384
RL-0074879	0.0289668	0.0817333	0.0572681	0.145115	0.955395	0.144287	0.234176	0.483917	3	0.00564435	0.916322	0.957247	384
RL-0074885	0.18459	0.00838536	0.115938	-0.43119	0.956518	-0.406797	0.64775	0.804829	3	0.00564435	0.916322	0.957247	384
RL-0074249	1.10241e-11	0.999666	0.998989	2.91384	0.958044	2.79723	1.21005	1.10002	3	0.00564435	0.916322	0.957247	384
RL-0069741	0.0154448	0.128982	0.0807309	0.29655	0.960345	0.290434	2.05969	1.43516	3	0.00564435	0.916322	0.957247	384
RL-0074742	0.00789421	0.190532	0.119995	0.443934	0.955158	0.429672	0.147286	0.383779	3	0.00564435	0.916322	0.957247	384
RL-0074743	0.00107437	0.412607	0.296353	0.822153	0.956408	0.791958	0.607032	0.779122	3	0.00564435	0.916322	0.957247	384
RL-0069701	0.000384746	0.529429	0.404788	0.992285	0.955176	0.953451	0.153869	0.392261	3	0.00564435	0.916322	0.957247	384
RL-0074744	0.999991	1.74174e-14	0.999965	-3.42606	0.95533	-3.26737	0.210323	0.45861	3	0.00564435	0.916322	0.957247	384
RL-0070046	0.795464	1.93393e-05	0.695125	-1.42627	0.956117	-1.35804	0.49994	0.707064	3	0.00564435	0.916322	0.957247	384
RL-0061453	0.0734484	0.0329482	0.0543347	-0.112164	0.962461	-0.102309	2.84302	1.68613	3	0.00564435	0.916322	0.957247	384
RL-0074745	0.00528542	0.231739	0.149305	0.526382	0.955967	0.508848	0.444805	0.666937	3	0.00564435	0.916322	0.957247	384
RL-0069747	1.68841e-05	0.804204	0.705965	1.44429	0.958562	1.39009	1.40119	1.18372	3	0.00564435	0.916322	0.957247	384
RL-0074746	6.65238e-17	1	0.999998	4.68526	1.02451	4.80574	52.1034	7.21827	2	0.00564435	0.916322	0.957247	384
RL-0070042	0.586043	0.000226522	0.461138	-1.07516	0.957379	-1.02369	0.964838	0.982262	3	0.00564435	0.916322	0.957247	384
RL-0062346	0.167194	0.0100522	0.10435	-0.392334	0.954962	-0.369019	0.0749983	0.273858	3	0.00564435	0.916322	0.957247	384
RL-0070050	0.0887773	0.0261058	0.0601327	-0.171202	0.95827	-0.158414	1.29334	1.13725	3	0.00564435	0.916322	0.957247	384
RL-0074747	0.0289285	0.0818209	0.0573018	0.14545	0.959474	0.1452	1.73799	1.31833	3	0.00564435	0.916322	0.957247	384
RL-0074748	9.21744e-46	1	1	7.22038	1.55051	11.2009	287.312	16.9503	3	0.00564435	0.916322	0.957247	384
RL-0070048	0.000295171	0.55816	0.433063	1.03413	0.955007	0.993242	0.0914649	0.302432	3	0.00564435	0.916322	0.957247	384
RL-0000113	0.0157787	0.127198	0.0797051	0.29163	0.960203	0.285669	2.00748	1.41686	3	0.00564435	0.916322	0.957247	384
RL-0074771	0.000372109	0.533091	0.408355	0.997601	0.972144	0.975456	6.44903	2.53949	3	0.00564435	0.916322	0.957247	384
RL-0063130	0.0141615	0.136337	0.0850426	0.316347	0.960018	0.309343	1.93882	1.39241	3	0.00564435	0.916322	0.957247	384
RL-0000471	0.0475238	0.052578	0.0500688	0.0141441	0.956733	0.0191765	0.727	0.852643	3	0.00564435	0.916322	0.957247	384
RL-0000475	0.959005	2.46565e-07	0.922798	-1.95382	0.957746	-1.86562	1.09999	1.04881	3	0.00564435	0.916322	0.957247	384
RL-0003420	0.0102659	0.165222	0.103064	0.387767	0.956968	0.376725	0.813443	0.901911	3	0.00564435	0.916322	0.957247	384
RL-0000491	0.114808	0.0183827	0.072822	-0.256059	0.956106	-0.239175	0.495933	0.704225	3	0.00564435	0.916322	0.957247	384
RL-0072039	0.235643	0.00509491	0.152179	-0.533741	0.954788	-0.503965	0.0109686	0.104731	3	0.00564435	0.916322	0.957247	384
RL-0071477	0.000205567	0.596045	0.471366	1.09002	0.955499	1.04716	0.272531	0.522045	3	0.00564435	0.916322	0.957247	384
RL-0000662	0.00081794	0.444221	0.324682	0.868669	0.966916	0.845574	4.49765	2.12077	3	0.00564435	0.916322	0.957247	384
RL-0000672	6.09212e-07	0.940963	0.893948	1.852	0.960657	1.78479	2.17532	1.4749	3	0.00564435	0.916322	0.957247	384
RL-0074772	0.00100521	0.420341	0.303214	0.833598	0.959986	0.805886	1.92705	1.38818	3	0.00564435	0.916322	0.957247	384
RL-0074773	0.999993	1.12469e-14	0.999972	-3.4587	0.95926	-3.31215	1.65884	1.28796	3	0.00564435	0.916322	0.957247	384
RL-0074774	0.797576	1.87227e-05	0.697735	-1.7521	0.960974	-1.67808	3.66164	1.91354	2	0.00564435	0.916322	0.957247	384
RL-0074775	0.0228075	0.0983919	0.0644828	0.204431	0.962258	0.20236	2.76773	1.66365	3	0.00564435	0.916322	0.957247	384
RL-0074776	0.997356	6.05799e-10	0.993317	-2.55988	1.00328	-2.56262	18.2873	4.27636	3	0.00564435	0.916322	0.957247	384
RL-0001879	0.0105148	0.162987	0.101616	0.382552	0.9582	0.372205	1.26752	1.12584	3	0.00564435	0.916322	0.957247	384
RL-0074777	0.00169152	0.359759	0.250674	0.742329	0.966677	0.723237	4.4088	2.09971	3	0.00564435	0.916322	0.957247	384
RL-0074778	0.00304843	0.292127	0.195379	0.633741	0.95506	0.610905	0.111033	0.333217	3	0.00564435	0.916322	0.957247	384
RL-0001064	0.159953	0.010865	0.099663	-0.375394	0.955174	-0.352922	0.152937	0.391071	3	0.00564435	0.916322	0.957247	384
RL-0062015	0.0174327	0.119042	0.0751239	0.268505	0.965677	0.264934	4.03677	2.00917	3	0.00564435	0.916322	0.957247	384
RL-0074779	0.122371	0.0167311	0.0769715	-0.278074	0.955907	-0.260169	0.422628	0.650099	3	0.00564435	0.916322	0.957247	384
RL-0071302	0.0824105	0.0286727	0.05753	-0.147695	0.963142	-0.136607	3.09526	1.75934	3	0.00564435	0.916322	0.957247	384
RL-0074780	0.63941	0.000132872	0.516697	-1.1557	0.957671	-1.10114	1.07233	1.03554	3	0.00564435	0.916322	0.957247	384
RL-0002889	0.0142181	0.135995	0.084839	0.315442	0.963766	0.309657	3.32675	1.82394	3	0.00564435	0.916322	0.957247	384
RL-0074801	0.0362093	0.0676885	0.0526377	0.0875401	0.956325	0.0893612	0.576674	0.75939	3	0.00564435	0.916322	0.957247	384
RL-0074802	3.71155e-07	0.951568	0.910709	1.9082	0.961816	1.84098	2.60397	1.61368	3	0.00564435	0.916322	0.957247	384
RL-0001079	0.635694	0.000138088	0.512748	-1.14998	0.956328	-1.09412	0.577866	0.760175	3	0.00564435	0.916322	0.957247	384
RL-0074803	0.0657113	0.0374406	0.052132	-0.0787146	0.955022	-0.0695298	0.0969818	0.311419	3	0.00564435	0.916322	0.957247	384
RL-0000935	0.213206	0.0063092	0.135882	-0.490464	0.956556	-0.463512	0.661712	0.813457	3	0.00564435	0.916322	0.957247	384
RL-0074804	0.555187	0.000303481	0.430107	-1.02978	0.959499	-0.982428	1.74714	1.32179	3	0.00564435	0.916322	0.957247	384
RL-0074503	0.0363099	0.0675232	0.0525938	0.0868098	0.955868	0.088623	0.408285	0.638972	3	0.00564435	0.916322	0.957247	384

## Sheet: Co-culture_Field level
compound	pwr_less	pwr_greater	pwr_two.sided	effect_d	pooled_sigma	compound_mu	compound_s2	compound_sd	compound_n	control_mu	control_s2	control_sd	control_n
Birabresib.(1µM)	5.71678e-32	1	1	1.12523	48.5836	155.12	3429.45	58.5615	80	100.452	2280.61	47.7557	1060
Birabresib.(0.5µM)	3.26154e-19	1	1	0.83576	48.1039	140.656	2791.53	52.8349	75	100.452	2280.61	47.7557	1060
Birabresib.(0.3µM)	4.30088e-08	0.980506	0.959873	0.467312	48.3575	123.05	3326.29	57.674	63	100.452	2280.61	47.7557	1060
Birabresib.(0.1µM)	1.21276e-09	0.996282	0.990901	0.477234	47.9672	123.344	2565.44	50.6502	82	100.452	2280.61	47.7557	1060
Birabresib.(0.05µM)	4.84447e-06	0.871664	0.79366	0.344711	47.7268	116.904	2232.05	47.2446	65	100.452	2280.61	47.7557	1060
(+)-JQ1.(10µM)	1.13355e-24	1	1	0.955038	48.13	146.418	2797.53	52.8917	80	100.452	2280.61	47.7557	1060
(+)-JQ1.(5µM)	1.20192e-28	1	1	1.09982	48.3796	153.661	3222.76	56.7694	73	100.452	2280.61	47.7557	1060
(+)-JQ1.(3µM)	4.47445e-36	1	1	1.19716	48.7624	158.829	3648.12	60.3996	82	100.452	2280.61	47.7557	1060
(+)-JQ1.(1µM)	2.26584e-33	1	1	1.23527	48.83	160.771	3976.78	63.0617	70	100.452	2280.61	47.7557	1060
(+)-JQ1.(0.5µM)	1.16041e-36	1	1	1.25579	49.241	162.289	4458.83	66.7745	76	100.452	2280.61	47.7557	1060
(+)-JQ1.(0.3µM)	1.37958e-30	1	1	1.06201	48.4462	151.903	3184.4	56.4305	85	100.452	2280.61	47.7557	1060
(+)-JQ1.(0.1µM)	6.62519e-30	1	1	1.19747	48.4786	158.504	3501.27	59.1716	65	100.452	2280.61	47.7557	1060
(+)-JQ1.(0.05µM)	2.01677e-17	1	0.999999	0.797506	48.4226	139.07	3301.35	57.4573	72	100.452	2280.61	47.7557	1060
I-BET151.(10µM)	1.34775e-35	1	1	1.42422	49.9491	171.591	6547.59	80.9172	57	100.452	2280.61	47.7557	1060
I-BET151.(5µM)	3.4228e-32	1	1	1.37549	49.1802	168.099	5177.64	71.9558	54	100.452	2280.61	47.7557	1060
I-BET151.(3µM)	1.41483e-13	0.99997	0.999891	0.825218	48.6671	140.613	4391.49	66.2683	47	100.452	2280.61	47.7557	1060
I-BET.151.(1µM)	3.42285e-20	1	1	0.982857	49.8467	149.445	6276.25	79.2228	58	100.452	2280.61	47.7557	1060
I-BET151.(0.5µM)	1.64756e-20	1	1	1.00188	49.0123	149.557	4701.73	68.5691	57	100.452	2280.61	47.7557	1060
I-BET151.(0.3µM)	3.03797e-15	0.999997	0.999987	0.928279	49.3754	146.287	6312.29	79.4499	44	100.452	2280.61	47.7557	1060
I-BET151.(0.1µM)	0.000756467	0.453226	0.332887	0.220452	47.9545	111.024	2728.26	52.2327	48	100.452	2280.61	47.7557	1060
I-Bet.151.(0.05µM)	0.0128265	0.144963	0.090255	0.0813428	48.523	104.399	3888.35	62.3567	52	100.452	2280.61	47.7557	1060
Birabresib.(10µM)	8.01188e-10	0.996965	0.992427	0.661645	47.9171	132.157	2676.15	51.7316	44	100.452	2280.61	47.7557	1060
Birabresib.(5µM)	3.54544e-17	1	0.999999	0.938279	48.2069	145.684	3240.83	56.9282	51	100.452	2280.61	47.7557	1060
Birabresib.(3µM)	3.92599e-15	0.999996	0.999984	0.875013	48.3007	142.716	3487.77	59.0573	49	100.452	2280.61	47.7557	1060
(+)-JQ1.(0.03µM)	2.7093e-13	0.999957	0.999847	0.651862	47.0602	131.129	1244.73	35.2808	73	100.452	2280.61	47.7557	1060
(+)-JQ1.(0.01µM)	0.000793055	0.447786	0.327922	0.187738	47.156	109.305	1281.75	35.8015	65	100.452	2280.61	47.7557	1060
(+)-JQ1.(0.005µM)	1.50351e-05	0.811443	0.715026	0.31601	47.045	115.319	1080.55	32.8717	64	100.452	2280.61	47.7557	1060
(+)-JQ1.(0.003µM)	4.69281e-05	0.731133	0.618355	0.270253	46.9357	113.137	1011.21	31.7995	70	100.452	2280.61	47.7557	1060
(+)-JQ1.(0.001µM)	0.0741655	0.032573	0.0545672	-0.0238331	46.8035	99.337	808.631	28.4364	70	100.452	2280.61	47.7557	1060

## Sheet: Co-culture_Well level
compound	pwr_less	pwr_greater	pwr_two.sided	effect_d	pooled_sigma	compound_mu	compound_s2	compound_sd	compound_n	control_mu	control_s2	control_sd	control_n
Birabresib.(10µM)	2.6111e-21	1	1	2.58659	21.6916	156.533	1613.94	40.1739	9	100.425	418.257	20.4513	176
Birabresib.(5µM)	7.38059e-25	1	1	2.86125	21.4308	161.744	1356.64	36.8326	9	100.425	418.257	20.4513	176
Birabresib.(3µM)	1.24923e-21	1	1	2.61233	21.9026	157.642	1824.28	42.7116	9	100.425	418.257	20.4513	176
Birabresib.(1µM)	5.56203e-20	1	1	2.4775	21.7963	154.426	1718.06	41.4495	9	100.425	418.257	20.4513	176
Birabresib.(0.5µM)	8.46131e-14	0.999978	0.999917	1.90875	21.5348	141.53	1458.86	38.195	9	100.425	418.257	20.4513	176
Birabresib.(0.3µM)	1.48585e-06	0.916677	0.857228	1.07053	22.094	124.078	2235.4	47.28	8	100.425	418.257	20.4513	176
Birabresib.(0.1µM)	6.81352e-07	0.938302	0.889819	1.06184	20.4937	122.186	457.919	21.399	9	100.425	418.257	20.4513	176
Birabresib.(0.05µM)	4.66664e-05	0.731578	0.61887	0.799896	20.3483	116.702	308.944	17.5768	8	100.425	418.257	20.4513	176
(+)-JQ1.(10µM)	2.05426e-15	0.999997	0.999989	2.06891	21.2602	144.411	1190.01	34.4965	9	100.425	418.257	20.4513	176
(+)-JQ1.(5µM)	5.03861e-18	1	1	2.3094	22.588	152.59	2521.89	50.2184	9	100.425	418.257	20.4513	176
(+)-JQ1.(3µM)	2.60185e-24	1	1	2.82034	21.9589	162.357	1880.79	43.3681	9	100.425	418.257	20.4513	176
(+)-JQ1.(1µM)	4.10657e-23	1	1	2.72898	21.9845	160.421	1906.51	43.6636	9	100.425	418.257	20.4513	176
(+)-JQ1.(0.5µM)	1.45795e-24	1	1	2.83921	21.8808	162.549	1802.49	42.4557	9	100.425	418.257	20.4513	176
(+)-JQ1.(0.3µM)	3.6268e-18	1	1	2.32199	22.0538	151.634	1976.33	44.4559	9	100.425	418.257	20.4513	176
(+)-JQ1.(0.1µM)	2.7997e-22	1	1	2.66393	20.8594	155.993	803.88	28.3528	9	100.425	418.257	20.4513	176
(+)-JQ1.(0.05µM)	4.97017e-12	0.999782	0.999319	1.72084	21.0794	136.7	1014.98	31.8588	9	100.425	418.257	20.4513	176
I-BET151.(10µM)	4.83565e-22	1	1	3.23965	22.3285	172.762	3309.31	57.5266	6	100.425	418.257	20.4513	176
I-BET151.(5µM)	6.90015e-22	1	1	3.22464	21.5861	170.033	2135.57	46.2122	6	100.425	418.257	20.4513	176
I-BET151.(3µM)	3.95486e-11	0.999342	0.998119	1.98305	21.3713	142.806	1803.33	42.4656	6	100.425	418.257	20.4513	176
I-BET.151.(1µM)	7.52434e-13	0.999923	0.999739	2.21646	21.5643	148.222	2101.67	45.844	6	100.425	418.257	20.4513	176
I-BET151.(0.5µM)	3.65631e-14	0.999986	0.999947	2.38306	21.7101	152.162	2328.81	48.2577	6	100.425	418.257	20.4513	176
I-BET151.(0.3µM)	2.52874e-13	0.999958	0.999852	2.27757	21.0337	148.331	1287.96	35.8881	6	100.425	418.257	20.4513	176
I-BET151.(0.1µM)	0.00371217	0.270096	0.178184	0.421448	20.4199	109.031	371.949	19.286	6	100.425	418.257	20.4513	176
I-Bet.151.(0.05µM)	0.0112729	0.156568	0.0975027	0.259723	20.5236	105.756	524.938	22.9115	6	100.425	418.257	20.4513	176
(+)-JQ1.(0.03µM)	8.8382e-10	0.996815	0.992089	1.45766	20.3607	130.104	333.64	18.2658	9	100.425	418.257	20.4513	176
(+)-JQ1.(0.01µM)	0.000467728	0.507797	0.383926	0.554799	20.3523	111.717	325.8	18.0499	9	100.425	418.257	20.4513	176
(+)-JQ1.(0.005µM)	1.07838e-05	0.831046	0.739954	0.86772	20.2277	117.977	210.183	14.4977	9	100.425	418.257	20.4513	176
(+)-JQ1.(0.003µM)	0.000195461	0.601191	0.47666	0.633761	20.1588	113.201	146.477	12.1027	9	100.425	418.257	20.4513	176
(+)-JQ1.(0.001µM)	0.0621911	0.039795	0.0513426	-0.0360722	20.2022	99.6966	186.628	13.6612	9	100.425	418.257	20.4513	176

## Sheet: Neuron mono_Field level
compound	pwr_less	pwr_greater	pwr_two.sided	effect_d	pooled_sigma	compound_mu	compound_s2	compound_sd	compound_n	control_mu	control_s2	control_sd	control_n
Birabresib	1.89542e-14	0.999991	0.999963	0.294686	36.8279	110.815	1611.69	40.1458	404	99.962	1291.48	35.9371	1589
(+)-JQ1	1.47169e-08	0.987935	0.973807	0.19098	35.5271	106.747	1150.3	33.9161	417	99.962	1291.48	35.9371	1589
I-BET151	1.14522e-10	0.998859	0.996887	0.229946	36.4233	108.337	1460.93	38.2221	417	99.962	1291.48	35.9371	1589
VS-5584	1.26262e-08	0.98875	0.975391	0.193453	35.4804	106.826	1132.83	33.6576	412	99.962	1291.48	35.9371	1589
BI-D1870	0.00284832	0.299806	0.201471	0.0592712	35.6924	102.077	1195.76	34.5798	357	99.962	1291.48	35.9371	1589
GSK429286A	0.348252	0.00186781	0.24101	-0.0628191	35.1761	97.7522	1021.42	31.9597	399	99.962	1291.48	35.9371	1589

## Sheet: Neuron mono_Well level
compound	pwr_less	pwr_greater	pwr_two.sided	effect_d	pooled_sigma	compound_mu	compound_s2	compound_sd	compound_n	control_mu	control_s2	control_sd	control_n
Birabresib	3.01841e-07	0.955465	0.917007	0.463893	25.2465	111.419	781.994	27.9642	52	99.707	599.568	24.4861	196
(+)-JQ1	5.08932e-05	0.724608	0.610841	0.310832	23.9015	107.136	463.128	21.5204	52	99.707	599.568	24.4861	196
I-BET151	4.36931e-07	0.94828	0.905457	0.453918	23.7087	110.469	418.849	20.4658	52	99.707	599.568	24.4861	196
VS-5584	7.44763e-05	0.692554	0.574578	0.300774	24.0769	106.949	502.198	22.4098	51	99.707	599.568	24.4861	196
BI-D1870	0.00378017	0.268087	0.176637	0.146606	23.9594	103.22	470.389	21.6885	49	99.707	599.568	24.4861	196
GSK429286A	0.15907	0.0109695	0.0990979	-0.0914384	23.2102	97.5847	296.536	17.2202	50	99.707	599.568	24.4861	196
