# Supplementary material for: High-content synaptic phenotyping in human cellular models reveals a role for BET proteins in synapse assembly
Source: eLife. 2023 Apr 21;12:e80168. doi: 10.7554/eLife.80168 (PMC10121225; doi:10.7554/eLife.80168)
Supplement: Supplementary file 3. [file elife-80168-supp3.xlsx]

## Sheet: Sheet1
id	baseMean	log2FoldChange	lfcSE	stat	pvalue	padj
PADI2	16712.7	-3.69158	0.0690773	-53.4412	0	0
MFAP5	7059.2	-2.98968	0.0731328	-40.8802	0	0
NUPR1	2623.03	-7.32991	0.179004	-40.9482	0	0
GJB2	4913.94	-7.51095	0.158381	-47.4233	0	0
IGFBP5	334119	-4.25345	0.0753223	-56.47	0	0
COL6A3	10782.8	-5.61736	0.0940774	-59.7101	0	0
SCRG1	1782.87	-3.73255	0.0971465	-38.4219	0	0
FLG	4360.97	-3.56508	0.0811162	-43.9502	0	0
DDR2	12068.5	-3.44883	0.0856057	-40.2874	0	0
KIAA1199	5328.88	-5.37758	0.119564	-44.9765	0	0
TRIB3	4002.43	-3.25951	0.0864407	-37.708	0	0
APOL6	1391.51	-4.19783	0.111968	-37.4914	1.272e-307	1.72028e-304
ALDH1L2	6849.53	-2.69091	0.0720155	-37.3658	1.40604e-305	1.75528e-302
PRICKLE1	9877.15	-2.38785	0.064811	-36.8433	3.74678e-297	4.34332e-294
MYOF	17672.3	-2.32355	0.0635315	-36.5732	7.63102e-293	8.25626e-290
HIST1H2BD	1253.83	4.22686	0.116719	36.2141	3.65126e-287	3.70352e-284
CSPG4	4997.55	-3.42459	0.0949957	-36.0499	1.38238e-284	1.31968e-281
TNS1	3689.62	-3.22465	0.090297	-35.7116	2.60962e-279	2.35286e-276
UTS2	2861.91	-3.59927	0.101679	-35.3985	1.80088e-274	1.53824e-271
GDF15	1460.58	-3.3626	0.0955643	-35.1868	3.18444e-271	2.58401e-268
MOCOS	1542.19	-3.64519	0.104255	-34.9643	7.85399e-268	6.06964e-265
SIK1	8550.33	-2.39424	0.0693963	-34.501	7.7456e-261	5.71379e-258
H3F3B	33875.9	1.93927	0.0563297	34.4271	9.9037e-260	6.98814e-257
CREB3L1	4903.36	-2.93104	0.0865196	-33.8771	1.44766e-251	9.78918e-249
HIST2H2BE	3907.5	2.78069	0.0825727	33.6757	1.31168e-248	8.51493e-246
CDH3	2177.42	-3.24828	0.0974534	-33.3316	1.34433e-243	8.3912e-241
ARRDC4	37441.7	2.04622	0.0615333	33.2538	1.80001e-242	1.08194e-239
CPA4	4607.83	3.58786	0.109306	32.8241	2.67227e-236	1.54887e-233
SORCS2	3881.71	-3.33215	0.10208	-32.6425	1.02326e-233	5.72636e-231
SPEG	2426.78	-2.61269	0.0804681	-32.4687	2.95422e-231	1.59814e-228
KCNH1	1707.94	-3.02551	0.0933103	-32.4241	1.25412e-230	6.56552e-228
C15orf52	1234.27	-3.37497	0.105074	-32.1198	2.33154e-226	1.18246e-223
GDF11	8882.54	2.95147	0.0919202	32.109	3.29964e-226	1.62272e-223
ANGPTL4	1476.96	3.89915	0.123166	31.6576	5.95311e-220	2.84156e-217
SLC1A5	6975.96	-2.51723	0.079858	-31.5213	4.43171e-218	2.05492e-215
CNN1	5238.51	-2.19933	0.070255	-31.305	3.99586e-215	1.80136e-212
EPS8L2	1601.06	-2.91086	0.0934022	-31.1648	3.20076e-213	1.40392e-210
KCTD15	1432.3	-3.19893	0.103101	-31.0271	2.32488e-211	9.92908e-209
SYNE1	7608.06	-2.44804	0.0791957	-30.9112	8.43641e-210	3.51063e-207
TLL2	2011.86	3.10287	0.100569	30.8531	5.08313e-209	2.06235e-206
MXRA5	27120.4	-2.9239	0.0947894	-30.8463	6.28159e-209	2.48644e-206
HMOX1	1314.84	-3.36213	0.109082	-30.8222	1.32257e-208	5.11048e-206
GRIK5	1078.33	-3.5914	0.117372	-30.5985	1.28229e-205	4.83959e-203
ARHGAP31	2840.72	-2.4402	0.0804878	-30.3176	6.71046e-202	2.47509e-199
AMIGO2	7307.04	-2.39252	0.0793896	-30.1365	1.61325e-199	5.81808e-197
ZNF532	4799.69	-2.07772	0.0692959	-29.9833	1.62027e-197	5.71638e-195
SLC6A9	880.892	-4.61174	0.154878	-29.7767	7.83295e-195	2.7047e-192
S100A6	2504.01	-2.83015	0.095931	-29.5019	2.71903e-191	9.19314e-189
PPM1L	4017	2.43821	0.0839028	29.0599	1.15332e-185	3.81984e-183
B3GALT1	986.381	3.30997	0.114193	28.9858	9.9274e-185	3.22224e-182
MCHR1	1047.29	-3.05566	0.106339	-28.735	1.39481e-181	4.43851e-179
EPAS1	1953.44	-2.51019	0.0874873	-28.692	4.79724e-181	1.4972e-178
RHOB	8321.3	2.11216	0.0736848	28.6649	1.04671e-180	3.2051e-178
ERAP2	1156.77	-3.11933	0.109129	-28.5839	1.06593e-179	3.2035e-177
C1S	2546.99	-2.60349	0.0915107	-28.4501	4.86268e-178	1.43484e-175
MGAT5	11851.2	2.25616	0.0800718	28.1767	1.12966e-174	3.2738e-172
PEG10	48632.8	2.07421	0.0737164	28.1377	3.38813e-174	9.64666e-172
COL7A1	1569.05	-2.48572	0.0884216	-28.1121	6.96357e-174	1.94848e-171
TMEM45A	2218.34	-2.27846	0.0811605	-28.0735	2.06236e-173	5.6729e-171
PCK2	1870.11	-2.67645	0.0954484	-28.0409	5.16218e-173	1.39628e-170
ZNF469	1089.12	-3.55204	0.127176	-27.9302	1.14762e-171	3.05324e-169
COL12A1	27338.7	-2.68821	0.0969182	-27.7369	2.50439e-169	6.55545e-167
HIST1H2AC	2105.03	2.39861	0.0870485	27.5549	3.86959e-167	9.96819e-165
SLC44A5	4660.45	2.22605	0.0813065	27.3785	4.95048e-165	1.25533e-162
SCN2A	902.838	-2.97	0.108957	-27.2585	1.31898e-163	3.29319e-161
ANKRD1	35905.9	1.72913	0.0640134	27.012	1.06826e-160	2.62679e-158
PLEKHG4B	606.49	-3.73593	0.138891	-26.8982	2.30532e-159	5.58404e-157
HYAL2	4261.38	2.06188	0.0769611	26.7913	4.08532e-158	9.75011e-156
PHGDH	3546.05	-2.81588	0.105473	-26.6977	5.00215e-157	1.17652e-154
TSPAN18	635.292	-3.66615	0.137708	-26.6227	3.70472e-156	8.58914e-154
ALDH1B1	2918.2	-2.08737	0.0784077	-26.622	3.77325e-156	8.62479e-154
SFRP2	3674.48	-1.95686	0.0736755	-26.5605	1.94179e-155	4.37684e-153
MYO1C	5672.18	-1.75358	0.0661463	-26.5107	7.29582e-155	1.62197e-152
SAMD9L	1104.03	-2.8271	0.106917	-26.4421	4.50056e-154	9.87021e-152
SDC1	19056.9	-2.79213	0.105727	-26.4088	1.08703e-153	2.35218e-151
LTBP1	12132	-2.16265	0.0820973	-26.3425	6.25555e-153	1.33581e-150
GBP3	1208.61	-3.18373	0.121501	-26.2032	2.44204e-151	5.147e-149
GLCE	3154.99	2.60258	0.0994138	26.1792	4.58148e-151	9.53241e-149
FGF5	11444.3	2.74187	0.105817	25.9115	4.94254e-148	1.01535e-145
CHAC1	1368.39	-2.49137	0.0962875	-25.8743	1.29559e-147	2.62826e-145
VCAN	96967.6	-2.64479	0.102647	-25.7658	2.14498e-146	4.29764e-144
GDE1	8882.42	1.67818	0.0652491	25.7195	7.06681e-146	1.39862e-143
PAMR1	3805.09	-2.10107	0.0817155	-25.712	8.57553e-146	1.67677e-143
AKNA	1236.14	-2.55737	0.0996796	-25.6559	3.63149e-145	7.01613e-143
SH2D4A	1215.54	-2.3594	0.0919975	-25.6464	4.64241e-145	8.86373e-143
RUNX2	3214.1	-2.22444	0.0873552	-25.4643	4.90498e-143	9.25616e-141
ANXA11	3984.65	-1.84092	0.072365	-25.4393	9.27093e-143	1.7294e-140
CHD3	5488.19	-1.97124	0.0775831	-25.4081	2.05214e-142	3.78457e-140
C19orf66	563.733	-3.87774	0.153528	-25.2575	9.3685e-141	1.70833e-138
MSC	1052.29	-3.61872	0.143295	-25.2536	1.03419e-140	1.86487e-138
ELN	2302.02	-2.6475	0.1058	-25.0235	3.3916e-138	6.04861e-136
COL1A2	564166	-2.32431	0.0928879	-25.0227	3.46023e-138	6.10392e-136
STC2	7782.48	-2.85114	0.114254	-24.9544	1.91474e-137	3.34132e-135
YPEL1	1801.26	2.04116	0.0818386	24.9413	2.65344e-137	4.58113e-135
GFPT2	6948.22	2.3528	0.0957904	24.562	3.21954e-133	5.49999e-131
ITIH5	520.685	-3.55732	0.145091	-24.5178	9.53718e-133	1.61228e-130
FN1	679182	-2.24087	0.091476	-24.4969	1.59501e-132	2.66861e-130
TGFB3	1149.5	-2.28862	0.093919	-24.368	3.73524e-131	6.18563e-129
ATF4	16005.5	-1.51062	0.0621522	-24.3051	1.731e-130	2.83761e-128
PTPRU	2846.35	-2.25034	0.0927113	-24.2725	3.82464e-130	6.20701e-128
FOS	1407.1	2.40324	0.0991665	24.2344	9.65054e-130	1.55068e-127
NDRG1	3625.13	-1.88271	0.077961	-24.1494	7.56971e-129	1.2044e-126
ENC1	102611	1.66946	0.0693781	24.0632	6.07299e-128	9.56879e-126
SEZ6	1472.05	-2.366	0.0985642	-24.0047	2.48484e-127	3.87755e-125
RP11-383H13.1	919.457	-2.73063	0.113948	-23.9638	6.63198e-127	1.02505e-124
EGR1	8183.11	2.58372	0.10806	23.91	2.4133e-126	3.69485e-124
KIF26B	5895.3	-1.8865	0.0789525	-23.8941	3.52565e-126	5.34746e-124
MYH11	421.787	-4.79559	0.200759	-23.8873	4.15e-126	6.23614e-124
APOL2	1336.92	-2.51006	0.105359	-23.8239	1.88744e-125	2.81021e-123
AEBP1	3725.4	-2.0896	0.0879184	-23.7675	7.24833e-125	1.06939e-122
OTOGL	591.185	-2.97724	0.125306	-23.7597	8.72509e-125	1.27567e-122
H1F0	4752.82	1.93105	0.0815681	23.6741	6.66371e-124	9.65584e-122
BAIAP2L1	493.568	-3.52959	0.149204	-23.6562	1.01896e-123	1.46342e-121
SHROOM2	768.643	-2.83815	0.11999	-23.6532	1.0944e-123	1.55798e-121
SRC	1417.03	-2.08314	0.0884153	-23.5608	9.72617e-123	1.37257e-120
NPR2	1023.05	-2.50315	0.10645	-23.5149	2.87192e-122	4.01797e-120
KANK1	1536.32	-2.08107	0.0889396	-23.3987	4.40478e-121	6.10984e-119
SYNPO2	1257.09	-3.19221	0.13644	-23.3965	4.64196e-121	6.38427e-119
HKDC1	418.543	-5.47456	0.235937	-23.2035	4.2011e-119	5.72938e-117
GGH	1629.75	2.04942	0.0884496	23.1705	9.04406e-119	1.21718e-116
CD44	75847.5	2.34152	0.101057	23.1703	9.07505e-119	1.21718e-116
WARS	17658.2	-1.67315	0.0724497	-23.0939	5.33203e-118	7.09291e-116
ADCY7	721.307	-3.23116	0.140419	-23.0108	3.63212e-117	4.79233e-115
COL11A1	33886	-1.76822	0.0769746	-22.9714	9.00111e-117	1.17806e-114
PIPOX	779.832	-3.01477	0.13134	-22.954	1.34519e-116	1.74649e-114
ZNF618	1362.16	-2.27498	0.0991861	-22.9365	2.01093e-116	2.5901e-114
MT2A	2400.47	2.42084	0.105561	22.9331	2.17446e-116	2.77869e-114
SLC12A7	679.028	-2.88659	0.125944	-22.9196	2.95952e-116	3.75234e-114
ITPKB	813.282	-3.17554	0.13907	-22.8342	2.09954e-115	2.64136e-113
EIF4EBP2	14719.3	1.51948	0.0665467	22.8332	2.14538e-115	2.67825e-113
FBLIM1	6018.7	-1.68611	0.0739245	-22.8085	3.77672e-115	4.67881e-113
LIMS2	1024.19	-2.4373	0.106905	-22.7987	4.7197e-115	5.80272e-113
CDH6	3892.64	2.07755	0.0913791	22.7355	1.99596e-114	2.43552e-112
MT1X	952.027	2.60362	0.114641	22.711	3.48673e-114	4.22285e-112
CHST11	4675.37	1.72962	0.0762361	22.6876	5.93238e-114	7.1316e-112
HEXIM1	8084.61	1.89425	0.0835983	22.659	1.13851e-113	1.3586e-111
GPM6B	6153.3	2.30476	0.102132	22.5665	9.2385e-113	1.09439e-110
PBX3	4288.62	1.77376	0.0786038	22.5658	9.39034e-113	1.10432e-110
EGR3	847.501	4.07804	0.180772	22.559	1.09581e-112	1.27942e-110
SERPINH1	40780.9	-1.71052	0.0758901	-22.5395	1.70394e-112	1.97524e-110
AASS	1277.61	1.97319	0.0875996	22.5251	2.35808e-112	2.71413e-110
PYCR1	2504.1	-2.71517	0.121238	-22.3953	4.37525e-111	5.00041e-109
ARHGEF5	404.764	-3.75638	0.167995	-22.3601	9.62773e-111	1.09265e-108
INPP5D	393.157	-4.92402	0.220311	-22.3503	1.19838e-110	1.35059e-108
CAV1	6981.49	-1.80521	0.0807707	-22.3498	1.21307e-110	1.35772e-108
CXCL12	4093.48	-2.17688	0.0974842	-22.3305	1.8664e-110	2.07465e-108
ABCA1	29375	1.66997	0.0751499	22.2219	2.10959e-109	2.32901e-107
GPR124	5811.93	-1.78678	0.0804217	-22.2176	2.32075e-109	2.54483e-107
TGFBRAP1	1525.26	-1.90275	0.0858399	-22.1662	7.27429e-109	7.92311e-107
CHST2	4852.94	2.18455	0.0985661	22.1633	7.76536e-109	8.40161e-107
APOBEC3C	1662.57	-3.33643	0.150969	-22.1001	3.15675e-108	3.39277e-106
MEGF9	5892.84	1.59322	0.0721822	22.0723	5.8393e-108	6.23461e-106
TMEM2	24427	1.6824	0.0767063	21.933	1.2592e-106	1.33565e-104
ST6GALNAC5	3843.84	1.70734	0.0779504	21.9029	2.43726e-106	2.56846e-104
FILIP1L	19004.7	-2.29425	0.105052	-21.8392	9.8459e-106	1.0309e-103
KCNN4	362.644	-5.21846	0.238964	-21.8379	1.014e-105	1.05488e-103
DYSF	821.957	-2.63927	0.121107	-21.7929	2.71161e-105	2.80298e-103
ZHX2	780.37	-2.53394	0.11629	-21.7899	2.8942e-105	2.97278e-103
TFRC	14146.1	1.68234	0.0773995	21.7358	9.42038e-105	9.61531e-103
TSPAN11	437.108	-3.48735	0.160621	-21.7116	1.59294e-104	1.61574e-102
SERPINA3	10069.8	-2.07522	0.095593	-21.7089	1.69029e-104	1.70384e-102
SEMA3C	33977.3	2.05573	0.0947972	21.6856	2.80635e-104	2.81137e-102
S100A11	9010.81	-1.57791	0.0731236	-21.5786	2.85109e-103	2.83867e-101
DUSP6	2919.42	1.79667	0.0833211	21.5632	3.98026e-103	3.93875e-101
FKBP9	13036.2	-1.46133	0.0677844	-21.5586	4.40079e-103	4.32851e-101
MARVELD1	2605.07	-1.65366	0.0768211	-21.5261	8.86409e-103	8.66598e-101
H2AFY2	1207.02	-2.06203	0.0959465	-21.4915	1.86982e-102	1.81708e-100
LTBP2	5314.47	-1.98851	0.0925876	-21.477	2.55379e-102	2.46699e-100
HERPUD1	6656.62	-1.52488	0.0711873	-21.4206	8.58165e-102	8.24092e-100
COL1A1	928546	-2.29522	0.107261	-21.3985	1.37896e-101	1.31642e-99
H2AFV	7015.36	1.34389	0.0631092	21.2947	1.27169e-100	1.20692e-98
LARP6	1985.71	-1.64225	0.0771681	-21.2814	1.68768e-100	1.5924e-98
PDE1C	7021.5	-1.74969	0.0823605	-21.2442	3.7274e-100	3.49664e-98
KRT7	449.309	-6.27835	0.29681	-21.1528	2.60162e-99	2.42653e-97
SYTL2	5519.48	-1.3767	0.0650978	-21.1481	2.87038e-99	2.66191e-97
ARL6IP1	7542.75	1.54865	0.0733938	21.1005	7.86691e-99	7.2541e-97
BCL2L11	2897.11	1.52177	0.0721348	21.0962	8.61549e-99	7.89948e-97
FGF11	3334.13	-1.55635	0.0738352	-21.0786	1.24947e-98	1.13919e-96
LOXL3	1234.86	-3.01005	0.143598	-20.9617	1.46862e-97	1.33152e-95
IL11	2536.16	3.16792	0.151304	20.9374	2.4433e-97	2.20291e-95
KCNE4	944.944	-2.35038	0.112289	-20.9315	2.76391e-97	2.4782e-95
TUBB3	30999.4	2.03702	0.0973693	20.9206	3.47986e-97	3.103e-95
HOPX	848.206	2.15591	0.103186	20.8934	6.14994e-97	5.45396e-95
ALPK2	8602.11	-1.50855	0.0722218	-20.8878	6.91174e-97	6.09623e-95
IGDCC4	736.244	-3.20591	0.153599	-20.872	9.62595e-97	8.4443e-95
EFNB2	20008.8	1.60981	0.0771392	20.8689	1.02633e-96	8.95497e-95
ANXA3	795.897	-2.62071	0.125688	-20.8509	1.49607e-96	1.29838e-94
OBSCN	664.425	-2.40737	0.11577	-20.7944	4.86689e-96	4.20132e-94
METTL7B	708.53	3.12109	0.150778	20.6999	3.46872e-95	2.97851e-93
DCXR	2296.46	2.14082	0.103428	20.6986	3.56459e-95	3.04472e-93
DCBLD2	68322.7	2.02663	0.0979254	20.6957	3.79027e-95	3.22054e-93
PALM	3986.56	-1.47066	0.0711047	-20.683	4.92862e-95	4.16597e-93
SFRP4	2517.03	-1.68149	0.0817835	-20.5602	6.23633e-94	5.24401e-92
GARS	14547	-1.44015	0.0700774	-20.5509	7.55417e-94	6.31941e-92
SCG2	14667.8	-1.55902	0.0759332	-20.5314	1.12822e-93	9.38969e-92
FOSB	1287.17	3.24497	0.158169	20.5159	1.55339e-93	1.28623e-91
MAPK3	1025.54	-2.0117	0.0981373	-20.4989	2.20432e-93	1.81593e-91
SYNE2	4215.43	1.81031	0.0883178	20.4976	2.26056e-93	1.85286e-91
H2AFX	1530.74	2.25573	0.110263	20.4577	5.1337e-93	4.18667e-91
PPP1R3C	14640.7	-1.33792	0.0655297	-20.4169	1.18241e-92	9.59463e-91
HOXB4	3734.78	2.02557	0.0994034	20.3772	2.66201e-92	2.14934e-90
PLN	748.863	-2.64414	0.129826	-20.3668	3.29292e-92	2.64558e-90
SEMA6A	2850.82	1.70461	0.0837406	20.3559	4.11933e-92	3.29324e-90
GRIA1	1316.71	-1.80869	0.0888553	-20.3554	4.15796e-92	3.30782e-90
ZCCHC14	4856.15	1.36619	0.0671263	20.3526	4.40694e-92	3.48879e-90
TNFRSF19	4014.54	-1.52173	0.0748309	-20.3356	6.23025e-92	4.90829e-90
TRIP6	1335.64	-2.05609	0.101238	-20.3095	1.05888e-91	8.3017e-90
ANPEP	645.134	-2.85319	0.140493	-20.3084	1.08383e-91	8.45648e-90
MZT2B	999.16	-2.00011	0.0986853	-20.2676	2.48629e-91	1.93062e-89
DOCK11	2880.8	1.63897	0.0808736	20.2658	2.57623e-91	1.99094e-89
TBC1D2	898.693	-2.10748	0.104207	-20.224	6.02329e-91	4.6328e-89
ZYG11B	5054.95	1.37174	0.0678347	20.2218	6.29056e-91	4.81554e-89
PODNL1	626.917	-2.38423	0.117916	-20.2198	6.56006e-91	4.99827e-89
YARS	7355.27	-1.39349	0.0690142	-20.1914	1.16516e-90	8.83614e-89
TNFAIP2	517.774	-3.33784	0.165455	-20.1737	1.6667e-90	1.25808e-88
TGFB1I1	2256.46	-1.70967	0.0848344	-20.153	2.53087e-90	1.90155e-88
SH3PXD2A	9331.79	-1.56951	0.0780701	-20.1039	6.8266e-90	5.10548e-88
HCFC1R1	2116.94	2.16013	0.107462	20.1013	7.18912e-90	5.35194e-88
SIPA1L2	6183	1.65431	0.082354	20.0877	9.44461e-90	6.99893e-88
PLEKHA4	781.753	-2.33566	0.116304	-20.0824	1.05273e-89	7.76583e-88
MMP19	298.237	-3.87758	0.193287	-20.0613	1.60798e-89	1.18081e-87
TPM2	65965.8	-1.51289	0.0755337	-20.0293	3.058e-89	2.23551e-87
TAPBP	4553.05	-1.49678	0.0749321	-19.9752	9.05641e-89	6.59087e-87
IARS	16750.6	-1.46129	0.0731693	-19.9713	9.78555e-89	7.08972e-87
C21orf62	410.653	-3.32773	0.166938	-19.934	2.06576e-88	1.49001e-86
KRT80	377.47	-3.25341	0.163354	-19.9163	2.93702e-88	2.10907e-86
XPOT	11141.9	-1.56487	0.0788245	-19.8526	1.04577e-87	7.47656e-86
SYNC	1950.57	-1.80386	0.0909953	-19.8236	1.86222e-87	1.32553e-85
FAM84A	1094.52	1.96242	0.0990129	19.8198	2.00747e-87	1.42267e-85
FTL	103237	1.57518	0.0795236	19.8077	2.55502e-87	1.80285e-85
RASL11B	1565.47	-1.8726	0.0945862	-19.7978	3.11146e-87	2.18597e-85
VEGFA	10323.9	-1.41423	0.0715803	-19.7572	6.95664e-87	4.86635e-85
ITGA2	2848.36	2.01348	0.101914	19.7567	7.03089e-87	4.89718e-85
DLG1	16954.3	-1.4468	0.0733772	-19.7173	1.53299e-86	1.0632e-84
PHF17	2752.65	-1.47232	0.0746874	-19.7131	1.66596e-86	1.15051e-84
PLEKHA2	2707.98	-1.64904	0.08374	-19.6923	2.50795e-86	1.72464e-84
MICALL1	3491.45	-1.83986	0.0936198	-19.6524	5.51057e-86	3.77347e-84
NPAS2	1341.92	-2.02003	0.102897	-19.6315	8.32057e-86	5.67372e-84
LRRC15	1302.11	-2.2549	0.114924	-19.6208	1.02642e-85	6.96979e-84
TBKBP1	830.298	-2.1316	0.108673	-19.6148	1.15622e-85	7.81845e-84
PLP1	315.908	-3.43408	0.17544	-19.5741	2.57118e-85	1.73144e-83
RPE65	318.623	-3.86709	0.197588	-19.5715	2.70551e-85	1.81437e-83
STRIP2	1479.03	1.80445	0.0922116	19.5685	2.86738e-85	1.91501e-83
FMN1	1600.55	-1.93081	0.0986833	-19.5658	3.02853e-85	2.01434e-83
THBS3	3425.1	-1.46408	0.0748467	-19.561	3.32429e-85	2.20203e-83
ODC1	23308.1	1.48027	0.0757351	19.5453	4.51895e-85	2.98122e-83
PIK3R3	7065.52	1.23296	0.0631643	19.5198	7.45047e-85	4.89529e-83
NOTCH3	5606.28	-1.89511	0.0971592	-19.5052	9.92569e-85	6.49532e-83
LMCD1	7434.87	-1.20218	0.0616401	-19.5032	1.03051e-84	6.71652e-83
ARAP1	1387.35	-1.83437	0.094074	-19.4993	1.11395e-84	7.23134e-83
ADAMTS9	10021	1.61523	0.0829208	19.4792	1.64988e-84	1.06677e-82
TP53I11	1391.19	-1.64323	0.0844302	-19.4625	2.28231e-84	1.46983e-82
KIAA0368	5031.97	-1.29259	0.066479	-19.4437	3.29774e-84	2.11538e-82
TYRO3	592.234	-2.31349	0.119058	-19.4317	4.16599e-84	2.6618e-82
CECR1	1357.48	-1.85705	0.0955951	-19.4262	4.6336e-84	2.94897e-82
MICAL2	16891.3	-1.83731	0.09461	-19.4199	5.24082e-84	3.3224e-82
CC2D2A	981.61	-2.03907	0.105013	-19.4173	5.51421e-84	3.48211e-82
TTLL12	2193.11	1.73482	0.0895535	19.3719	1.33306e-83	8.38536e-82
NEU1	3835.88	1.50934	0.07793	19.3678	1.44205e-83	9.0359e-82
RARG	651.948	-2.41236	0.124635	-19.3554	1.8362e-83	1.14614e-81
NMT2	2114.16	1.53883	0.0798169	19.2796	7.9735e-83	4.95793e-81
EFR3B	2869.73	2.11871	0.109996	19.2617	1.12686e-82	6.9801e-81
2022-03-08	1277.07	-1.75278	0.0910978	-19.2406	1.69219e-82	1.0442e-80
FKBP8	5462.71	-1.24491	0.0647551	-19.2249	2.28971e-82	1.40757e-80
ANP32B	4067.01	-1.45654	0.0758082	-19.2135	2.8536e-82	1.74759e-80
SSH3	572.247	-2.51231	0.130791	-19.2086	3.13379e-82	1.91197e-80
SLFN5	19972.2	-1.39865	0.0728759	-19.1922	4.30028e-82	2.61383e-80
ADAMTS16	4162.99	-1.9557	0.101961	-19.1808	5.35201e-82	3.24096e-80
MYL9	23320.3	-2.02605	0.105696	-19.1688	6.74715e-82	4.07061e-80
NALCN	1268.09	-2.25918	0.117956	-19.1527	9.18657e-82	5.52181e-80
NFATC2	869.6	2.80138	0.146366	19.1396	1.18131e-81	7.07437e-80
SLAIN1	1033.05	1.95269	0.102128	19.1201	1.71832e-81	1.02524e-79
LRRC4B	327.172	-3.3618	0.17603	-19.0979	2.62946e-81	1.56313e-79
CAPN1	2829.52	-1.58928	0.0833191	-19.0746	4.10424e-81	2.43094e-79
HN1	11338	1.49022	0.0781924	19.0584	5.59288e-81	3.30061e-79
RHOJ	1075.29	-1.77736	0.0932904	-19.0519	6.34018e-81	3.72807e-79
CCND2	5560.18	-1.4443	0.0760319	-18.9959	1.8424e-80	1.07944e-78
LRP1	72442.8	-1.7178	0.0908379	-18.9107	9.31988e-80	5.44073e-78
SOX11	13568.2	1.68546	0.0891444	18.9071	9.96777e-80	5.7981e-78
OSBPL6	3347.14	1.35778	0.0719162	18.8801	1.66331e-79	9.64066e-78
PARP3	361.286	-3.64488	0.193467	-18.8398	3.56218e-79	2.05732e-77
DDIT4	13481.5	-1.39909	0.0743048	-18.829	4.36941e-79	2.51458e-77
PSAT1	10765.4	-1.86719	0.0992981	-18.8039	7.02243e-79	4.0271e-77
TMEM50B	3071.2	1.51591	0.0806723	18.791	8.95492e-79	5.11723e-77
CLTCL1	1312.13	-1.87173	0.0996759	-18.7782	1.13975e-78	6.49017e-77
SAMHD1	1968.75	1.52001	0.0809969	18.7663	1.42509e-78	8.08661e-77
FRMD4A	1602.42	-2.5279	0.134943	-18.7332	2.65655e-78	1.5022e-76
ISLR	265.519	-4.75839	0.254112	-18.7256	3.06255e-78	1.72577e-76
SORBS3	1651.08	-1.91115	0.102074	-18.7232	3.20457e-78	1.79955e-76
GTPBP2	4099.79	-1.44364	0.0771433	-18.7137	3.82722e-78	2.14179e-76
HIST2H2BF	207.69	5.02193	0.268467	18.7059	4.43026e-78	2.47074e-76
TPM4	78959.5	-1.15455	0.0617494	-18.6973	5.21058e-78	2.89598e-76
PARP10	299.833	-3.63483	0.194427	-18.6951	5.42371e-78	3.00414e-76
PCSK5	2351.29	1.71686	0.0918383	18.6944	5.50325e-78	3.03783e-76
ALDH3B1	682.411	-2.05212	0.109784	-18.6924	5.71086e-78	3.14175e-76
SNAI2	2583.02	-1.47914	0.0792075	-18.6743	8.01666e-78	4.39535e-76
ZNF395	1928.68	-1.46809	0.078724	-18.6486	1.29598e-77	7.08162e-76
PLXNB3	860.471	-2.11345	0.113383	-18.6399	1.52504e-77	8.30534e-76
VDR	661.922	-2.29053	0.123015	-18.6198	2.21924e-77	1.20455e-75
PCYOX1	14780.1	1.23568	0.066513	18.5781	4.83557e-77	2.61588e-75
ITGA5	14058.1	-1.58555	0.0853684	-18.573	5.31058e-77	2.8633e-75
SLC7A11	5357.45	-2.19654	0.11831	-18.566	6.0547e-77	3.2537e-75
RABIF	1628.98	1.60336	0.0863901	18.5595	6.83283e-77	3.65973e-75
MEGF10	978.392	-2.29475	0.123736	-18.5456	8.85459e-77	4.72701e-75
MUC1	337.288	-2.95334	0.159419	-18.5257	1.2816e-76	6.81939e-75
AK4	9514.72	-1.2686	0.0684914	-18.5221	1.37027e-76	7.26733e-75
PRDM1	1056.65	-1.75781	0.0950058	-18.5022	1.98265e-76	1.04809e-74
CDC42EP1	1969.25	-1.78952	0.0968541	-18.4764	3.19765e-76	1.68489e-74
TMBIM1	1991.67	-1.85624	0.100717	-18.4303	7.50658e-76	3.94253e-74
ZNF37A	1992.68	-1.5346	0.0832703	-18.4292	7.6635e-76	4.01197e-74
CALM1	26389.1	1.04456	0.0567539	18.4051	1.19655e-75	6.24397e-74
GTF3C6	1121.56	-1.73459	0.0942776	-18.3988	1.34358e-75	6.98875e-74
SH3BP5	9665.51	1.48044	0.0805583	18.3773	1.99841e-75	1.03617e-73
ADAMTSL1	712.914	-2.23891	0.121982	-18.3545	3.03985e-75	1.57114e-73
RIMS3	2001.28	-1.65301	0.090064	-18.3538	3.07999e-75	1.58683e-73
NTM	3186.99	-1.60474	0.0874968	-18.3405	3.92968e-75	2.01819e-73
C16orf62	2392.03	-1.46219	0.0799137	-18.2972	8.71744e-75	4.46294e-73
SH3D19	6616.94	-1.25942	0.0689285	-18.2714	1.39695e-74	7.12926e-73
GPR125	4502.85	1.37033	0.0751144	18.2432	2.34284e-74	1.19191e-72
PITPNA	8795.08	1.30748	0.0717957	18.2111	4.21766e-74	2.13901e-72
HIST1H1C	611.012	2.26805	0.124557	18.2089	4.38424e-74	2.21657e-72
EFEMP2	6157.41	-1.18592	0.0652632	-18.1714	8.69151e-74	4.38057e-72
FAM13C	1524.49	-1.86052	0.102563	-18.1403	1.53168e-73	7.69585e-72
BTBD11	1117.42	1.62301	0.0897515	18.0834	4.30953e-73	2.15862e-71
ZBTB7B	1173.6	-1.83017	0.101344	-18.059	6.7037e-73	3.34752e-71
MFAP2	6120.35	-1.20162	0.0667029	-18.0145	1.50063e-72	7.47047e-71
NFYA	3116.21	1.26589	0.0703114	18.004	1.81226e-72	8.99423e-71
B4GALT5	9717.38	1.26456	0.0703496	17.9754	3.03748e-72	1.5029e-70
IGF2BP1	2548.24	-1.48458	0.0826734	-17.9572	4.21604e-72	2.0797e-70
LONRF2	5111.96	1.37926	0.0768889	17.9384	5.91512e-72	2.90898e-70
NDUFA4L2	571.653	-2.11662	0.11806	-17.9284	7.07617e-72	3.46946e-70
BACE1	14367.6	1.34601	0.075241	17.8892	1.43035e-71	6.99191e-70
RGS3	2942.88	-1.33633	0.0747472	-17.878	1.75121e-71	8.53466e-70
ARHGAP26	970.628	1.70935	0.0957807	17.8465	3.07774e-71	1.49547e-69
MAP1A	27486.4	-1.72795	0.0968451	-17.8424	3.31212e-71	1.60455e-69
CFLAR	2530.01	-1.52005	0.085256	-17.8292	4.19463e-71	2.02603e-69
TTL	6476.63	1.11182	0.0625086	17.7867	8.95597e-71	4.31295e-69
TMTC2	1073.55	1.65303	0.0932324	17.7302	2.45283e-70	1.17772e-68
TENM2	2620.47	-1.97688	0.111521	-17.7265	2.62037e-70	1.25445e-68
DGCR2	11289.2	1.60469	0.090618	17.7082	3.62241e-70	1.72906e-68
TGFA	2173.49	-1.48655	0.0839678	-17.7038	3.91732e-70	1.86434e-68
EXD2	1279.64	-1.63204	0.0925686	-17.6306	1.43334e-69	6.80167e-68
SSC5D	5769.35	-2.06177	0.116948	-17.6298	1.45419e-69	6.88048e-68
MARS	8380.76	-1.19937	0.0680365	-17.6283	1.49266e-69	7.04195e-68
2022-09-08	4572.07	-1.18343	0.0671587	-17.6214	1.68653e-69	7.93354e-68
OBSL1	1921.3	-1.36709	0.077619	-17.6129	1.96231e-69	9.20415e-68
CARD8	497.276	-2.99181	0.169927	-17.6064	2.19917e-69	1.02854e-67
OLFML2B	585.797	-2.32404	0.13209	-17.5944	2.7196e-69	1.26829e-67
PRR5L	942.39	-1.77631	0.101045	-17.5793	3.54763e-69	1.6497e-67
FAM222A	463.095	2.68058	0.152551	17.5717	4.05973e-69	1.88244e-67
STIM2	2608.81	1.51838	0.0864319	17.5674	4.3811e-69	2.02567e-67
KIFC3	782.735	-1.85003	0.105419	-17.5494	6.01247e-69	2.77206e-67
GPR137C	908.726	2.17314	0.123934	17.5347	7.78282e-69	3.57811e-67
LRRN1	3666.62	1.21886	0.0695593	17.5227	9.62218e-69	4.41125e-67
CACNA1H	1618.25	-1.78956	0.102251	-17.5017	1.39064e-68	6.35739e-67
ELFN2	917.994	-5.68983	0.325209	-17.4959	1.53957e-68	7.01844e-67
NDST1	23078.8	-1.4697	0.0841112	-17.4733	2.28962e-68	1.04085e-66
SLC3A2	11469.7	-1.39611	0.0801138	-17.4266	5.18382e-68	2.34995e-66
FADS3	2271.04	-1.33031	0.076364	-17.4206	5.75935e-68	2.60358e-66
DNASE2	1266.59	-1.63627	0.0941037	-17.3879	1.01872e-67	4.59244e-66
PLEKHG5	878.04	-1.87755	0.10817	-17.3573	1.73607e-67	7.80462e-66
PLAU	7036.4	-2.09218	0.120647	-17.3414	2.29126e-67	1.0272e-65
ABTB2	1026.42	2.02348	0.116844	17.3177	3.45914e-67	1.54651e-65
CA10	474.884	-2.72556	0.157399	-17.3163	3.54359e-67	1.57991e-65
EIF4EBP1	1997.96	-1.42534	0.0823703	-17.304	4.38463e-67	1.94954e-65
SAMD9	363.771	-3.54586	0.20496	-17.3003	4.68192e-67	2.07604e-65
BTN3A3	445.403	-2.47611	0.143129	-17.2998	4.71672e-67	2.08577e-65
XBP1	4934.74	-1.41704	0.0820142	-17.278	6.88969e-67	3.03839e-65
TOMM34	2154.38	1.41943	0.0821542	17.2776	6.93267e-67	3.04906e-65
ALDH3A2	2742.91	1.23924	0.0717483	17.2721	7.63491e-67	3.34884e-65
TRIM14	550.949	-2.30704	0.133581	-17.2707	7.82165e-67	3.4215e-65
ALPK1	567.719	-2.04252	0.118288	-17.2674	8.27859e-67	3.61165e-65
KANK4	212.05	-4.73693	0.274527	-17.2549	1.02833e-66	4.47419e-65
MSRB3	4601.48	-1.61009	0.0933593	-17.2461	1.19613e-66	5.19039e-65
SRPX2	2849.96	-1.34788	0.0782421	-17.227	1.66515e-66	7.20632e-65
PODXL	1259.77	1.50638	0.0875459	17.2068	2.36307e-66	1.01995e-64
FBXO21	4493.04	1.10013	0.0639408	17.2054	2.41761e-66	1.04073e-64
HMGA1	5600.88	1.99578	0.116063	17.1956	2.86424e-66	1.22973e-64
ENOSF1	880.605	-1.81691	0.106028	-17.1362	7.97302e-66	3.41409e-64
TBC1D8	789.336	1.98475	0.115841	17.1334	8.36322e-66	3.57175e-64
ARHGEF2	6584.86	-1.3802	0.0808169	-17.0781	2.15901e-65	9.19648e-64
LYPD6	828.454	1.78788	0.104696	17.0768	2.20805e-65	9.38075e-64
ARSK	1085.62	1.55559	0.09118	17.0607	2.91176e-65	1.23381e-63
FBXO2	455.757	-2.31189	0.135553	-17.0553	3.19181e-65	1.34896e-63
LOXL2	39948.6	-1.40813	0.0828518	-16.9958	8.81848e-65	3.71727e-63
KLHL8	2047.88	1.47544	0.0871306	16.9337	2.54097e-64	1.06833e-62
TEAD3	1726.7	-1.37627	0.0813054	-16.9271	2.83813e-64	1.19018e-62
UXS1	3708.32	1.52389	0.090053	16.9221	3.09162e-64	1.29314e-62
SERPINB9	692.034	1.99056	0.117683	16.9146	3.51255e-64	1.46543e-62
BTN3A1	740.169	-2.53269	0.149879	-16.8982	4.63704e-64	1.9296e-62
MEIS3	1504.01	-1.5566	0.092203	-16.8824	6.06795e-64	2.51859e-62
P2RX6	196.408	-4.37448	0.259228	-16.875	6.8699e-64	2.84417e-62
NPTXR	2741.33	1.74975	0.10372	16.87	7.48309e-64	3.09015e-62
SNCG	276.548	-3.42253	0.202913	-16.867	7.87381e-64	3.24325e-62
COMP	491.615	-2.20456	0.130878	-16.8443	1.15478e-63	4.74454e-62
TAP2	1261.87	-1.658	0.0984443	-16.842	1.2013e-63	4.9232e-62
FBLN5	1826.99	-1.514	0.090021	-16.8182	1.79399e-63	7.33365e-62
FRZB	1770.03	1.52221	0.0905281	16.8148	1.90108e-63	7.75193e-62
PCDH9	1129.14	1.86648	0.111064	16.8054	2.22678e-63	9.05726e-62
RAB13	4216.3	-1.1495	0.0684981	-16.7816	3.33028e-63	1.35118e-61
IDH3A	1898.92	1.41082	0.0841284	16.7698	4.05852e-63	1.64254e-61
TIMP3	61517.9	-1.44983	0.0865453	-16.7523	5.44936e-63	2.19994e-61
EXTL3	11896.1	1.31785	0.0786844	16.7486	5.79601e-63	2.33408e-61
CPQ	1294.49	-1.5155	0.0905062	-16.7447	6.19046e-63	2.48676e-61
NT5DC3	4788.22	1.1257	0.0672905	16.729	8.05742e-63	3.22874e-61
HDGF	5513.83	-1.24011	0.0741385	-16.7269	8.3499e-63	3.3377e-61
ATP1B3	6413.25	1.2156	0.0727562	16.7079	1.14866e-62	4.58025e-61
STAT1	6920.75	1.07762	0.0645626	16.6911	1.52078e-62	6.0492e-61
CDH8	3749.91	1.1917	0.0715307	16.6599	2.56356e-62	1.01721e-60
SYT17	638.541	-1.9508	0.117164	-16.6502	3.01629e-62	1.19393e-60
ABLIM3	1111.16	-1.72172	0.103452	-16.6428	3.41511e-62	1.34851e-60
FAT3	6470.98	1.62298	0.097569	16.6342	3.93874e-62	1.5515e-60
MCL1	35488.3	1.23583	0.0742987	16.6333	3.99996e-62	1.5718e-60
STARD13	2534.33	1.30075	0.0784396	16.5828	9.28217e-62	3.63866e-60
C14orf37	5231.82	1.36928	0.0826551	16.5662	1.22391e-61	4.78623e-60
FKBP10	22413.5	-1.28349	0.0775752	-16.5451	1.73689e-61	6.77597e-60
SPARC	411105	-1.57626	0.0952772	-16.544	1.77003e-61	6.8887e-60
RASSF2	917.356	-1.78006	0.107644	-16.5366	1.9994e-61	7.76274e-60
PCBP3	379.386	2.52593	0.152771	16.5341	2.0839e-61	8.0715e-60
MARCKSL1	22086.2	1.38497	0.0839014	16.5071	3.25942e-61	1.25945e-59
PDCD1LG2	649.927	-2.16336	0.131092	-16.5025	3.51807e-61	1.35617e-59
CDK18	215.475	-3.38217	0.205071	-16.4926	4.14399e-61	1.59367e-59
ADAMTS10	786.384	-1.66321	0.100867	-16.4891	4.39621e-61	1.68667e-59
TRIM56	1319.06	-1.65382	0.100406	-16.4713	5.90143e-61	2.25883e-59
CTSL	2978.02	-1.21893	0.074022	-16.4672	6.31501e-61	2.41144e-59
FAIM2	419.981	-2.75832	0.167708	-16.4472	8.78665e-61	3.34738e-59
MID1IP1	1089.52	-1.56785	0.0953356	-16.4456	9.01302e-61	3.42558e-59
MTHFD2	9695.84	-1.36224	0.0829032	-16.4317	1.13368e-60	4.2987e-59
ULBP1	1443.38	-1.46016	0.0889108	-16.4228	1.31436e-60	4.97222e-59
SLC7A5	25212.3	-1.56608	0.0954145	-16.4134	1.53323e-60	5.78669e-59
ARSI	204.622	-4.04083	0.24629	-16.4068	1.71086e-60	6.44211e-59
GBP2	536.988	-1.97672	0.120729	-16.3733	2.9683e-60	1.11511e-58
PHLDA1	7972.7	1.26494	0.0772709	16.3701	3.12504e-60	1.17128e-58
LZTS1	5976.05	1.69745	0.103781	16.3561	3.93672e-60	1.4721e-58
CCNYL1	2150.76	1.41477	0.0865594	16.3445	4.76426e-60	1.77745e-58
ING1	1221.67	1.67702	0.102624	16.3414	5.00579e-60	1.86328e-58
ARHGEF25	938.685	-1.81245	0.110929	-16.3387	5.23196e-60	1.94301e-58
GABBR2	925.413	-1.87347	0.114674	-16.3374	5.35133e-60	1.9828e-58
CLSPN	236.778	2.93064	0.179389	16.3368	5.40138e-60	1.99679e-58
FRMD5	4060.26	1.18051	0.0722675	16.3353	5.53597e-60	2.04189e-58
ITGA4	8848.49	-2.0852	0.127803	-16.3158	7.62461e-60	2.80589e-58
MIDN	11680.1	1.72656	0.105896	16.3043	9.19991e-60	3.37795e-58
FNDC1	18899.9	-1.70382	0.104507	-16.3035	9.3183e-60	3.4137e-58
GPNMB	886.437	-2.04189	0.125267	-16.3003	9.81834e-60	3.58878e-58
ANTXR2	5886.02	1.23797	0.0761709	16.2525	2.14439e-59	7.82051e-58
ADI1	2498.6	1.27801	0.0786692	16.2453	2.41128e-59	8.77415e-58
FMNL2	12887.8	1.07707	0.0665094	16.1942	5.5405e-59	2.01156e-57
LAMP3	294.721	-3.69743	0.228403	-16.1882	6.11035e-59	2.2135e-57
SEMA6C	1557.73	1.79291	0.110879	16.1699	8.21688e-59	2.96997e-57
SHMT2	4293.66	-1.18835	0.0734972	-16.1686	8.39806e-59	3.02871e-57
SLC2A12	3322.75	-1.55971	0.0966032	-16.1455	1.22157e-58	4.39574e-57
MFI2	492.475	-1.97725	0.122711	-16.113	2.06737e-58	7.42286e-57
COPZ2	861.311	-2.54242	0.157824	-16.1092	2.19793e-58	7.87423e-57
APCDD1L	201.274	-3.70377	0.230108	-16.0958	2.7311e-58	9.76277e-57
CCND3	2473.65	1.41295	0.0877932	16.0941	2.8066e-58	1.00106e-56
DAB1	503.301	1.87032	0.116219	16.093	2.85518e-58	1.01616e-56
JPH2	267.214	-3.00844	0.187015	-16.0867	3.16321e-58	1.12087e-56
CORO1C	16443.2	0.964913	0.0599821	16.0867	3.16287e-58	1.12087e-56
BTN3A2	510.089	-2.37221	0.147566	-16.0756	3.7807e-58	1.33675e-56
TACR1	295.652	-2.75484	0.171502	-16.063	4.63561e-58	1.63546e-56
PDGFD	4032.54	1.4422	0.089824	16.0559	5.20013e-58	1.83065e-56
RGL2	1709.08	-1.30656	0.0814079	-16.0495	5.76389e-58	2.02472e-56
FMN2	700.492	2.08591	0.129983	16.0476	5.9443e-58	2.08358e-56
NRXN3	1385.13	1.3768	0.0859135	16.0255	8.48278e-58	2.96696e-56
FAM114A1	7537.94	-1.27332	0.0794572	-16.0252	8.52037e-58	2.9737e-56
ACSL1	2706.83	1.15865	0.0723172	16.0218	8.99907e-58	3.13403e-56
CARS	4784.82	-1.12489	0.0702107	-16.0216	9.0309e-58	3.13838e-56
CLGN	653.479	1.97144	0.12308	16.0175	9.64109e-58	3.33615e-56
GPX4	8346.59	1.29578	0.0808975	16.0176	9.63165e-58	3.33615e-56
FARP2	3666.17	1.2103	0.0756547	15.9977	1.32507e-57	4.57542e-56
RYR3	328.955	-2.43635	0.152371	-15.9896	1.51035e-57	5.20413e-56
IGLON5	266.987	-3.13536	0.196177	-15.9823	1.69707e-57	5.8351e-56
WNT2B	465.399	-2.95795	0.185251	-15.9672	2.16149e-57	7.41623e-56
SBNO1	7328.32	1.05515	0.0660929	15.9647	2.25037e-57	7.70491e-56
EDA2R	2078.27	-1.44561	0.0905652	-15.9621	2.34665e-57	8.01765e-56
COL15A1	327.685	-3.3704	0.211181	-15.9598	2.4357e-57	8.30442e-56
ANGPTL2	844.509	-2.81178	0.176207	-15.9573	2.53556e-57	8.62674e-56
HS2ST1	14694.9	1.66158	0.104145	15.9546	2.64771e-57	8.98947e-56
DDR1	8833.51	-1.35013	0.084667	-15.9463	3.02156e-57	1.02374e-55
NT5E	1679.93	1.52835	0.096041	15.9135	5.10511e-57	1.72606e-55
SCN4B	272.113	-2.87714	0.18085	-15.909	5.48735e-57	1.85144e-55
ST6GALNAC6	1431.13	-1.3598	0.0854817	-15.9075	5.62094e-57	1.89258e-55
TSPAN3	10857.5	1.00384	0.0631053	15.9073	5.63643e-57	1.89386e-55
MAPRE2	6732.21	1.08854	0.0684409	15.9048	5.86963e-57	1.96814e-55
FAM83H	484.724	-2.17357	0.136669	-15.9038	5.96016e-57	1.99438e-55
LFNG	1751.32	1.83151	0.11527	15.8889	7.5691e-57	2.52755e-55
B3GNT2	1224.64	1.59778	0.100578	15.8859	7.93416e-57	2.64401e-55
TSPO	1073.97	-1.95187	0.122897	-15.8822	8.4223e-57	2.80093e-55
PDZD8	7134.79	1.33446	0.0840549	15.876	9.29048e-57	3.08334e-55
SLC22A23	1857.4	1.57441	0.099187	15.8731	9.72407e-57	3.22065e-55
DLG4	1993	-1.42259	0.0896331	-15.8712	1.00233e-56	3.31298e-55
LPHN2	9508.77	1.00845	0.0635794	15.8612	1.17562e-56	3.87786e-55
CYP1B1	4694.98	-2.06057	0.130017	-15.8485	1.44079e-56	4.74291e-55
PDGFB	267.183	-3.21838	0.203118	-15.8449	1.52569e-56	5.01222e-55
BACE2	5156.2	-1.41855	0.0895935	-15.8331	1.83812e-56	6.02643e-55
C3orf58	5297.26	1.99815	0.126218	15.8309	1.90506e-56	6.2333e-55
CDH2	94807.6	1.26307	0.0798684	15.8144	2.47653e-56	8.08685e-55
FOXO1	2795.17	1.36049	0.0861126	15.799	3.16187e-56	1.0304e-54
HIST2H4B	146.614	4.45534	0.282203	15.7877	3.78198e-56	1.23001e-54
ROR2	177.827	-4.28662	0.271733	-15.7752	4.61298e-56	1.49728e-54
IGFL3	405.268	-2.2413	0.14229	-15.7516	6.69524e-56	2.1688e-54
ADM2	1193.69	-4.87111	0.309375	-15.745	7.4311e-56	2.40238e-54
FAM101A	462.909	-2.57955	0.163839	-15.7444	7.50645e-56	2.42191e-54
CNNM3	1244.2	1.56983	0.0997398	15.7393	8.13444e-56	2.61932e-54
KLF11	946.013	-1.59518	0.101375	-15.7354	8.64978e-56	2.77975e-54
CAMK1D	6116.9	-1.41817	0.0901551	-15.7304	9.36731e-56	3.00439e-54
SLC6A8	12262.3	1.42586	0.0907108	15.7187	1.12585e-55	3.60382e-54
NHSL1	1161.76	-1.4616	0.0931023	-15.6989	1.53956e-55	4.91841e-54
FIBCD1	579.247	-2.33451	0.148798	-15.689	1.79728e-55	5.73045e-54
AGO1	7957.36	1.08756	0.069462	15.6569	2.97946e-55	9.48109e-54
CTGF	81761	1.42749	0.0912291	15.6473	3.46442e-55	1.10027e-53
SLC44A1	5512.44	1.39948	0.0894919	15.638	4.00953e-55	1.27091e-53
CD59	18002.9	1.02236	0.0653825	15.6365	4.10577e-55	1.29888e-53
IL17RD	6659.49	1.20856	0.0774315	15.6082	6.4054e-55	2.02244e-53
TENC1	757.482	-1.99921	0.128113	-15.6051	6.72278e-55	2.11852e-53
MMP15	5602.19	1.64147	0.1053	15.5885	8.71622e-55	2.74138e-53
KIAA1958	1556.21	1.22407	0.0787518	15.5434	1.76366e-54	5.53626e-53
TMEM159	1060.62	-1.47098	0.0947484	-15.5252	2.34423e-54	7.34449e-53
JDP2	1379.77	-1.41781	0.0913525	-15.5202	2.53315e-54	7.92111e-53
C10orf54	170.606	-4.21555	0.271725	-15.514	2.78829e-54	8.70213e-53
PLEKHG1	11154.7	1.01501	0.0654339	15.512	2.8784e-54	8.96613e-53
LTA4H	4405.09	1.04052	0.0671031	15.5063	3.14724e-54	9.78478e-53
HIC1	524.99	-2.08224	0.134308	-15.5034	3.28808e-54	1.02031e-52
ZNF621	1925.17	-1.24441	0.0803134	-15.4944	3.78452e-54	1.17212e-52
ZCCHC2	1185	1.4931	0.0963771	15.4923	3.90965e-54	1.20857e-52
ANXA6	7440.42	-1.09371	0.0706491	-15.4808	4.67426e-54	1.44218e-52
WWC2	7331.66	1.04595	0.0676052	15.4714	5.41436e-54	1.66736e-52
UAP1L1	859.524	-1.6088	0.103997	-15.4697	5.55972e-54	1.70888e-52
DSE	3191.33	-1.32917	0.0859299	-15.468	5.70235e-54	1.7494e-52
MLPH	233.609	-3.04826	0.1971	-15.4656	5.92383e-54	1.81392e-52
TBCD	4669.27	1.35365	0.0875504	15.4614	6.32191e-54	1.93217e-52
HAUS3	984.976	1.68127	0.108841	15.4471	7.88878e-54	2.40652e-52
POU6F1	346.637	-2.30498	0.149378	-15.4305	1.02012e-53	3.10611e-52
KIAA1644	372.124	-2.71923	0.176381	-15.4168	1.26272e-53	3.83758e-52
H3F3A	4100.06	1.01751	0.066056	15.4037	1.5463e-53	4.69064e-52
MMP2	22161.1	-1.33832	0.0870702	-15.3706	2.57939e-53	7.80989e-52
C2CD2	381.528	-2.14721	0.139834	-15.3554	3.2573e-53	9.84408e-52
XRCC4	437.976	-2.351	0.153134	-15.3525	3.40611e-53	1.02747e-51
CHCHD7	1467.68	1.32748	0.0865306	15.3411	4.05945e-53	1.22228e-51
FUCA1	3307.03	1.15064	0.0750251	15.3367	4.3448e-53	1.30577e-51
GAS6	8806.49	-1.03563	0.0676088	-15.3179	5.80372e-53	1.74101e-51
ST5	9819.08	-1.41307	0.0925068	-15.2753	1.11738e-52	3.34573e-51
TEX2	8087.12	1.10905	0.0726074	15.2746	1.12842e-52	3.37257e-51
SOX6	651.531	-2.37875	0.155751	-15.2728	1.16102e-52	3.46364e-51
RUSC2	6062.31	-1.3683	0.0898005	-15.2371	2.00512e-52	5.97085e-51
SAP30L	2229.41	1.13942	0.0747898	15.2349	2.07305e-52	6.16181e-51
HOXB3	6746.4	1.23195	0.0809726	15.2145	2.83583e-52	8.41367e-51
AXL	3244.53	-1.22067	0.0802362	-15.2135	2.8771e-52	8.52052e-51
AES	8574.08	-1.10612	0.0727187	-15.211	2.99039e-52	8.8399e-51
CSDC2	522.085	-1.93344	0.127204	-15.1996	3.56009e-52	1.05049e-50
PLCH1	323.544	-2.24255	0.147671	-15.1861	4.37096e-52	1.28741e-50
CPNE1	4242.65	1.31016	0.0862846	15.1842	4.49888e-52	1.32269e-50
IRF1	1027.07	-1.55698	0.102542	-15.1839	4.523e-52	1.32594e-50
HIST1H2AG	146.899	4.07195	0.268177	15.1838	4.52627e-52	1.32594e-50
ABCC4	987.383	-1.5734	0.103627	-15.1833	4.5658e-52	1.33511e-50
GCH1	435.194	1.93927	0.127848	15.1685	5.71459e-52	1.66802e-50
PPP1R13L	491.343	-1.95889	0.129376	-15.1411	8.67921e-52	2.52881e-50
SDC4	13000.8	1.6827	0.111149	15.1391	8.93992e-52	2.60011e-50
CNN2	17897.8	-0.987313	0.0652254	-15.1369	9.24301e-52	2.68345e-50
FREM2	247.857	2.61722	0.172937	15.1339	9.67408e-52	2.80358e-50
ADAM23	1871.02	1.16318	0.0768737	15.1311	1.00995e-51	2.92164e-50
C1RL	981.733	-1.68805	0.111594	-15.1267	1.07971e-51	3.1179e-50
TNR	383.543	-2.60266	0.172072	-15.1254	1.10055e-51	3.17243e-50
CYB561	465.527	-2.07194	0.137058	-15.1172	1.24644e-51	3.58661e-50
CDON	3278.99	1.19981	0.0793837	15.1141	1.30778e-51	3.75645e-50
BAIAP2	2543.28	1.75831	0.116467	15.0971	1.69203e-51	4.85159e-50
EHD2	9580.18	-1.37386	0.0910675	-15.0862	1.9965e-51	5.7145e-50
SLIT2	3975.11	1.2796	0.0849013	15.0716	2.48973e-51	7.1137e-50
PLS1	446.227	1.90941	0.126859	15.0514	3.38053e-51	9.62501e-50
DDIT3	1751.31	-1.60294	0.106497	-15.0515	3.37632e-51	9.62501e-50
ABCA7	1439.91	1.43444	0.0953137	15.0497	3.46922e-51	9.86025e-50
PCDH17	1489.39	1.5554	0.103353	15.0494	3.4835e-51	9.88353e-50
CPNE3	8354.13	1.11276	0.0739422	15.049	3.50381e-51	9.9238e-50
DSEL	4936.55	1.28157	0.0851957	15.0426	3.85869e-51	1.09099e-49
HNMT	201.083	-3.23967	0.215403	-15.04	4.01342e-51	1.13276e-49
TRNP1	1748.16	1.51363	0.100676	15.0348	4.34619e-51	1.22455e-49
SCN2B	169.193	-3.74766	0.249416	-15.0257	4.98016e-51	1.40075e-49
GPT2	4170.91	-1.1656	0.0775999	-15.0206	5.37845e-51	1.51015e-49
RHBDD3	474.874	-1.81493	0.121181	-14.977	1.03771e-50	2.90361e-49
DUSP5	1430.22	1.79061	0.119557	14.9771	1.03663e-50	2.90361e-49
SYT2	677.279	-2.48829	0.166178	-14.9737	1.09149e-50	3.04885e-49
ELF4	821.141	-1.54066	0.102926	-14.9687	1.17574e-50	3.27852e-49
DOCK4	1180.16	1.60158	0.107185	14.9421	1.7529e-50	4.87956e-49
GFOD1	1308.01	1.41227	0.0945732	14.9331	2.00672e-50	5.57655e-49
FKBP5	3595.73	1.2227	0.0819692	14.9166	2.57197e-50	7.13513e-49
XPR1	11672.8	1.02376	0.0687012	14.9017	3.21316e-50	8.89871e-49
FOXD1	3216.07	1.29648	0.0870891	14.8869	4.01188e-50	1.10918e-48
C9orf91	934.957	-1.54325	0.103827	-14.8638	5.66381e-50	1.56323e-48
CRIM1	28657.4	1.36609	0.0919479	14.8572	6.24985e-50	1.72205e-48
ASIC1	1194.08	-1.686	0.113579	-14.8442	7.58093e-50	2.08527e-48
TXNRD1	12537.2	1.03974	0.0700502	14.8427	7.75245e-50	2.12884e-48
PPP1R13B	1379.89	1.50477	0.101402	14.8397	8.11196e-50	2.2238e-48
TNIK	4813.79	1.26393	0.0851811	14.8381	8.30867e-50	2.27388e-48
AARS	9288.43	-1.07226	0.0723112	-14.8285	9.5916e-50	2.62057e-48
ABHD12	2451.39	1.21268	0.0818621	14.8137	1.19463e-49	3.25842e-48
CAPRIN2	2880.72	1.19733	0.0808533	14.8087	1.28791e-49	3.50697e-48
ADAM12	36732.8	-1.46878	0.0992174	-14.8037	1.38674e-49	3.76974e-48
INADL	716.091	-1.58316	0.106952	-14.8024	1.41253e-49	3.83343e-48
SLC9A3R1	3537.12	1.25106	0.0846091	14.7863	1.79508e-49	4.8635e-48
AGPAT2	457.991	-1.86158	0.125973	-14.7776	2.04272e-49	5.52523e-48
ENSA	8926.41	1.06842	0.0723478	14.7678	2.36334e-49	6.3818e-48
SDC3	19386.9	-1.37838	0.0933722	-14.7622	2.56766e-49	6.92202e-48
DTX3L	1001.67	-1.89031	0.128104	-14.756	2.81375e-49	7.57285e-48
SPRY2	1640.53	1.15338	0.0781963	14.7498	3.08684e-49	8.2941e-48
CHKA	1540.76	1.35595	0.0919541	14.7459	3.26752e-49	8.76506e-48
AMPH	1332.03	1.40825	0.0955529	14.738	3.67749e-49	9.84851e-48
EFCAB4A	278.613	2.68453	0.182192	14.7346	3.86257e-49	1.03271e-47
ELMO1	335.835	-2.44685	0.166272	-14.7159	5.09369e-49	1.35963e-47
MARVELD2	231.295	-2.8734	0.195682	-14.684	8.15844e-49	2.17411e-47
SORT1	21463	1.01876	0.0693819	14.6834	8.23691e-49	2.19142e-47
WNT5A	2111.78	-1.51819	0.103477	-14.6718	9.77413e-49	2.59614e-47
SIRPA	2776.83	-1.3949	0.0953866	-14.6237	1.98445e-48	5.26237e-47
RABEP1	9488.19	0.924201	0.0632174	14.6194	2.11182e-48	5.59098e-47
ZNF365	647.477	-1.72594	0.11814	-14.6093	2.45147e-48	6.47962e-47
FOCAD	3422.09	1.14591	0.0784612	14.6048	2.61852e-48	6.90992e-47
QTRT1	681.462	-1.68932	0.115797	-14.5887	3.31507e-48	8.7338e-47
PHF11	483.551	-1.96267	0.134767	-14.5635	4.79638e-48	1.2616e-46
HBEGF	8841.43	1.82418	0.125364	14.5511	5.75053e-48	1.51012e-46
DPP7	1481.08	-1.18045	0.0811644	-14.544	6.37981e-48	1.67266e-46
KAL1	9039.05	1.4221	0.0977934	14.5418	6.57998e-48	1.72236e-46
KIAA1683	189.442	2.98259	0.205123	14.5405	6.71337e-48	1.75445e-46
TMEM154	405.355	-2.22487	0.153023	-14.5395	6.81173e-48	1.77729e-46
HMGN2	19641.8	1.28647	0.0885034	14.5359	7.1784e-48	1.86995e-46
TCIRG1	400.477	-2.08315	0.143312	-14.5357	7.19621e-48	1.87159e-46
FAM129A	21972.3	-1.22783	0.08448	-14.534	7.38283e-48	1.91705e-46
EPB41L5	1871.98	1.11626	0.0769173	14.5125	1.00932e-47	2.61666e-46
POU3F3	6083.95	1.17631	0.0810663	14.5104	1.04044e-47	2.69302e-46
DYNLL2	13655.3	1.22773	0.0847164	14.4922	1.35753e-47	3.50819e-46
IL17RC	410.658	-2.06016	0.142183	-14.4894	1.41287e-47	3.6454e-46
THOC6	952.977	1.67913	0.115991	14.4764	1.70934e-47	4.40332e-46
MAP3K3	2356.49	1.21797	0.0841871	14.4674	1.94647e-47	5.00622e-46
TMEM170B	2454.46	1.63115	0.112846	14.4547	2.34132e-47	6.01222e-46
AIM1	277.679	-2.54414	0.176073	-14.4493	2.53251e-47	6.4929e-46
DUSP1	1618.86	1.26569	0.0875961	14.4492	2.53693e-47	6.49397e-46
CLN3	447.246	-1.87596	0.130013	-14.429	3.40024e-47	8.69017e-46
FAM196B	183.329	-3.0697	0.212772	-14.4272	3.48999e-47	8.9055e-46
TRAM2	20721.7	-1.11854	0.0775667	-14.4203	3.85578e-47	9.82346e-46
ZNF827	4346.16	-1.05365	0.0730823	-14.4173	4.0283e-47	1.02469e-45
HMCN2	192.389	-3.35339	0.232788	-14.4054	4.78755e-47	1.21592e-45
TPD52L1	792.587	-1.94208	0.134837	-14.4032	4.939e-47	1.25242e-45
LITAF	1785.42	-1.12729	0.0783467	-14.3885	6.1107e-47	1.54712e-45
COMT	2646.21	-1.43754	0.0999148	-14.3877	6.18576e-47	1.56369e-45
STRA6	338.078	-2.23326	0.155238	-14.386	6.33603e-47	1.59918e-45
SYT11	23453.8	1.16315	0.0808751	14.3821	6.70751e-47	1.69031e-45
MFHAS1	1520.38	1.19567	0.0831969	14.3715	7.80719e-47	1.96439e-45
GLI1	148.546	-5.17141	0.360457	-14.3468	1.11566e-46	2.80279e-45
CYR61	23862.5	1.08854	0.0758907	14.3435	1.16938e-46	2.9332e-45
CPD	26393.1	1.14204	0.0796703	14.3345	1.33123e-46	3.33403e-45
TXNRD2	230.585	-2.66928	0.186234	-14.3329	1.36237e-46	3.40677e-45
ATP11A	3623.92	1.16626	0.0815373	14.3034	2.08515e-46	5.20613e-45
CHD5	559.302	-1.8975	0.132732	-14.2956	2.32966e-46	5.8077e-45
H1FX	4405.03	1.51108	0.105788	14.2841	2.74923e-46	6.84313e-45
PTMA	39276.6	1.26477	0.0886527	14.2666	3.5346e-46	8.78454e-45
MMP28	201.631	-2.94287	0.20632	-14.2636	3.68906e-46	9.15441e-45
ABHD17B	1288.04	1.34322	0.0941853	14.2614	3.80614e-46	9.43052e-45
SLC38A1	6775.21	-1.31359	0.0921179	-14.2599	3.89114e-46	9.62642e-45
LONP1	4906.99	-1.14265	0.0801853	-14.2501	4.47693e-46	1.10588e-44
PDE6D	1594.54	1.2673	0.0890084	14.238	5.32603e-46	1.31362e-44
PCDH7	2341.56	1.38791	0.0975797	14.2233	6.56777e-46	1.61742e-44
NTS	225.824	-2.98557	0.210101	-14.2102	7.92177e-46	1.94792e-44
SOX4	28411.1	1.40517	0.0988932	14.209	8.06168e-46	1.97932e-44
FBN1	233618	-1.31742	0.0927304	-14.207	8.28851e-46	2.03194e-44
MORN4	631.489	-1.69564	0.119371	-14.2048	8.55548e-46	2.09422e-44
CERCAM	3216.14	-1.56607	0.110378	-14.1883	1.08297e-45	2.64691e-44
SLC25A43	325.059	-2.46167	0.173635	-14.1773	1.26658e-45	3.09104e-44
RREB1	1363.75	-1.3982	0.0986724	-14.1701	1.40239e-45	3.41731e-44
PDK2	724.474	-1.63504	0.115401	-14.1684	1.43829e-45	3.49955e-44
SYDE1	1372.08	-1.18417	0.0836712	-14.1526	1.79956e-45	4.37201e-44
C1R	1178.01	-1.58915	0.112356	-14.1438	2.03872e-45	4.94564e-44
KIAA1217	4548.79	-1.14932	0.08135	-14.1281	2.54867e-45	6.1735e-44
PRKAR2B	2024.2	1.38091	0.0977987	14.1199	2.86502e-45	6.92942e-44
HSPA9	14772.6	-0.941952	0.0667912	-14.1029	3.6432e-45	8.79843e-44
F13A1	195.888	-3.00348	0.213034	-14.0986	3.87546e-45	9.34545e-44
GSS	3360.11	1.15446	0.0819094	14.0943	4.11653e-45	9.91204e-44
C14orf159	604.611	-1.53182	0.108685	-14.0942	4.12575e-45	9.91953e-44
LMBR1	4330.26	1.15676	0.082103	14.0891	4.42925e-45	1.06335e-43
LMOD1	1797.91	-1.16923	0.0830928	-14.0713	5.6989e-45	1.36614e-43
PFKFB3	16969.6	1.06833	0.075952	14.0659	6.15471e-45	1.47323e-43
TCF4	7015.98	-1.19064	0.0846965	-14.0577	6.91191e-45	1.65204e-43
SCARA3	1279.02	-1.50859	0.10734	-14.0543	7.24684e-45	1.72954e-43
ARHGEF40	2872.02	-1.20918	0.0860633	-14.0499	7.71408e-45	1.83835e-43
NETO2	2243.37	1.15198	0.0820751	14.0357	9.4256e-45	2.24293e-43
SRGAP2	6226.66	1.17333	0.0836666	14.0239	1.11328e-44	2.64531e-43
MAN2A1	10924.2	1.26024	0.0899091	14.0169	1.22937e-44	2.91688e-43
PTPRK	6234.92	1.08811	0.0776427	14.0143	1.27508e-44	3.02092e-43
SNX33	2003.1	-1.07026	0.0764184	-14.0053	1.44671e-44	3.42255e-43
ITPR3	1852.6	-1.44034	0.102906	-13.9966	1.63542e-44	3.86335e-43
PELI2	1861.52	1.09039	0.0779399	13.9901	1.79071e-44	4.22404e-43
TRIM16	744.315	-1.49058	0.106786	-13.9586	2.78816e-44	6.5588e-43
VASP	4999.62	-1.28587	0.09212	-13.9586	2.78857e-44	6.5588e-43
WNK1	39431.9	-0.927626	0.0665241	-13.9442	3.41162e-44	8.01263e-43
UBR3	5342.85	1.04679	0.0750748	13.9432	3.45845e-44	8.11087e-43
BNC2	2756.86	-1.31049	0.0939991	-13.9416	3.54058e-44	8.29149e-43
SERPINA5	261.216	-2.51752	0.180692	-13.9327	4.01159e-44	9.38099e-43
RYBP	4388.51	1.13536	0.0815143	13.9283	4.26343e-44	9.95557e-43
MYLIP	576.707	1.59271	0.114376	13.9253	4.44975e-44	1.03757e-42
TRH	1648.9	-1.71953	0.123548	-13.9178	4.93536e-44	1.14915e-42
HS3ST3B1	5830.6	1.12403	0.0807699	13.9165	5.03169e-44	1.1699e-42
IGF1	273.553	-3.25628	0.234168	-13.9057	5.8485e-44	1.35787e-42
PCDH10	1209.3	1.51526	0.109016	13.8994	6.3909e-44	1.48169e-42
ATP10A	1141.5	-1.53318	0.110365	-13.8919	7.0916e-44	1.64179e-42
GRIN3A	495.606	-2.439	0.175739	-13.8785	8.5469e-44	1.97589e-42
METTL21B	314.4	-2.40055	0.172979	-13.8777	8.65074e-44	1.99705e-42
TOM1L1	737.961	-2.05475	0.148107	-13.8734	9.17745e-44	2.11564e-42
SEMA3F	3060.77	1.57729	0.113753	13.8659	1.01906e-43	2.34586e-42
SARS	12410.5	-0.918441	0.0662688	-13.8593	1.11707e-43	2.56784e-42
NEXN	4219.09	-1.43528	0.103727	-13.837	1.52347e-43	3.49662e-42
PIANP	780.33	-1.48225	0.107123	-13.837	1.52542e-43	3.49662e-42
PAG1	4413.42	1.19338	0.0862807	13.8314	1.64843e-43	3.77326e-42
GLUL	8186.35	0.864982	0.0625897	13.8199	1.93399e-43	4.42068e-42
NFATC1	466.795	-1.79357	0.129792	-13.8188	1.96343e-43	4.48165e-42
GAREM	1953.68	1.06477	0.0770544	13.8184	1.97311e-43	4.49743e-42
CTNNAL1	1361.56	1.35794	0.0985071	13.7852	3.13029e-43	7.12503e-42
CERS4	730.142	-1.46497	0.106305	-13.7808	3.32554e-43	7.55885e-42
PDGFC	11857.3	-1.1198	0.0812631	-13.78	3.36377e-43	7.63504e-42
PRKAR1B	890.853	-1.44061	0.104722	-13.7566	4.65119e-43	1.05425e-41
PPP1R14C	1603.18	1.22056	0.0887354	13.755	4.75138e-43	1.07545e-41
TXNDC16	1493.14	1.36657	0.0993683	13.7525	4.91753e-43	1.11151e-41
TP53	5060.38	-1.13718	0.0827043	-13.7499	5.09883e-43	1.15089e-41
CDKN2B	7820.18	-1.11772	0.0813623	-13.7375	6.05193e-43	1.36412e-41
DAG1	21660.6	1.29973	0.0946274	13.7352	6.24649e-43	1.40602e-41
APMAP	10591.5	1.12338	0.0818049	13.7324	6.49231e-43	1.45933e-41
LAMB3	170.854	-3.19314	0.232585	-13.7289	6.81413e-43	1.52955e-41
PPFIA4	1135.27	-1.59076	0.115996	-13.7139	8.37903e-43	1.87822e-41
UNC93B1	340.721	-2.03839	0.148696	-13.7084	9.04126e-43	2.02387e-41
SERTAD1	1017.6	1.44681	0.105627	13.6974	1.05274e-42	2.35329e-41
SEMA7A	1385.39	1.5963	0.116666	13.6826	1.28955e-42	2.8787e-41
PER3	730.435	-1.43349	0.104769	-13.6824	1.29397e-42	2.88458e-41
C3orf18	411.613	-1.83603	0.134238	-13.6774	1.38519e-42	3.08371e-41
CD109	1464.59	-2.09188	0.152951	-13.6768	1.39766e-42	3.10722e-41
GRIK2	1483.23	1.14392	0.0836438	13.676	1.41182e-42	3.13438e-41
KIAA1324L	2116.43	1.03198	0.0755059	13.6675	1.58772e-42	3.52009e-41
SEC16B	146.752	-3.42573	0.250728	-13.6631	1.68647e-42	3.73394e-41
DDAH1	8391.4	0.992875	0.0726761	13.6616	1.72048e-42	3.80403e-41
KLHL7	3450.68	1.05153	0.076988	13.6583	1.80112e-42	3.97692e-41
GPN1	3993.23	1.05999	0.0776314	13.6541	1.90759e-42	4.20628e-41
ABR	4183.08	-0.940091	0.068932	-13.6379	2.38169e-42	5.24456e-41
PCED1B	188.941	-2.71026	0.198737	-13.6374	2.3999e-42	5.2775e-41
CARHSP1	3416.87	1.09412	0.0802445	13.6348	2.48666e-42	5.46089e-41
BRI3BP	1590.08	1.25314	0.091909	13.6345	2.49573e-42	5.4734e-41
DLX2	677.004	1.9669	0.144296	13.631	2.6188e-42	5.73556e-41
CAP2	2252.86	-1.08763	0.0797978	-13.6298	2.66151e-42	5.82125e-41
MAPK10	1132.95	-1.32663	0.097378	-13.6235	2.90152e-42	6.33765e-41
RGL1	2212.99	1.0178	0.0747125	13.6229	2.92629e-42	6.38318e-41
ABCA3	5448.01	1.27977	0.0940106	13.6131	3.34839e-42	7.2941e-41
FABP5	1647.52	1.1094	0.0815116	13.6103	3.47692e-42	7.56393e-41
SYNGR1	1172.93	-1.19338	0.0877124	-13.6056	3.70954e-42	8.05919e-41
MZT2A	282.937	-2.44478	0.179753	-13.6008	3.96307e-42	8.59848e-41
BMPR1B	1493.56	-1.48972	0.109733	-13.5758	5.57584e-42	1.20815e-40
C9orf9	364.791	-2.03475	0.150004	-13.5646	6.49356e-42	1.40512e-40
PTK2B	391.067	-1.84083	0.135754	-13.5601	6.90856e-42	1.49293e-40
ABCC3	1676.29	-1.29753	0.0957985	-13.5444	8.55408e-42	1.84604e-40
ONECUT2	5792.1	1.24607	0.0919996	13.5443	8.56532e-42	1.84604e-40
KIAA0195	1498.69	-1.40899	0.104133	-13.5307	1.03014e-41	2.21726e-40
IGFBP6	285.216	-2.20381	0.162876	-13.5306	1.0324e-41	2.21919e-40
NMI	284.538	-2.77924	0.205443	-13.528	1.06836e-41	2.29345e-40
LRRC41	2393.6	-1.1407	0.0843379	-13.5253	1.1088e-41	2.37712e-40
DNALI1	280.797	-2.45661	0.181658	-13.5233	1.13922e-41	2.43911e-40
XKR4	1799.02	1.369	0.101271	13.5181	1.22297e-41	2.61497e-40
CSE1L	5536.25	0.940688	0.0696426	13.5074	1.41481e-41	3.02117e-40
CCND1	6705.94	-1.38062	0.102269	-13.4999	1.56568e-41	3.33894e-40
CASP8	452.719	-1.81687	0.134602	-13.4981	1.60512e-41	3.41857e-40
FAS	893.729	-1.80652	0.133896	-13.4919	1.74461e-41	3.71079e-40
RGS4	1973.42	-1.4448	0.107146	-13.4844	1.93345e-41	4.10706e-40
SPATA18	347.912	-2.34143	0.173667	-13.4823	1.98705e-41	4.21541e-40
HTR2A	206.212	-2.68878	0.199521	-13.4761	2.16119e-41	4.57884e-40
CDKN2AIP	1192.16	1.18818	0.0881701	13.476	2.16632e-41	4.58373e-40
DNPEP	947.657	-1.37324	0.101945	-13.4704	2.33478e-41	4.93375e-40
ITFG3	9738.82	1.27174	0.0944312	13.4674	2.43263e-41	5.13383e-40
EPHB1	914.16	1.71078	0.127214	13.4481	3.15872e-41	6.65752e-40
MAPK8	3739.09	0.951965	0.0709101	13.425	4.31846e-41	9.09005e-40
CXADR	4393.32	1.43063	0.106682	13.4102	5.26734e-41	1.1073e-39
B3GNT9	279.611	-2.27175	0.169521	-13.401	5.96803e-41	1.25298e-39
RTF1	7180.82	0.934622	0.0698154	13.3871	7.19766e-41	1.50918e-39
BAZ1A	2810.11	1.19913	0.0895978	13.3834	7.55761e-41	1.58261e-39
PNRC2	5031.2	1.06511	0.0795938	13.3819	7.7194e-41	1.61441e-39
IRGQ	4266.22	0.94891	0.0710215	13.3609	1.02328e-40	2.1373e-39
BNIP3	12196.4	0.817035	0.0612059	13.3489	1.20133e-40	2.50596e-39
HSPA1B	2781.64	1.52208	0.114076	13.3427	1.30607e-40	2.72094e-39
SMAD3	1653.61	1.08157	0.0811836	13.3226	1.71141e-40	3.56084e-39
SLC12A2	3453.9	1.29207	0.0970015	13.3201	1.76784e-40	3.67353e-39
ARHGAP24	316.239	-2.50749	0.188301	-13.3164	1.85915e-40	3.85832e-39
BVES	3143.43	-0.982868	0.0738102	-13.3161	1.86479e-40	3.86509e-39
MLC1	132.73	-4.8935	0.367929	-13.3001	2.31028e-40	4.78233e-39
SH3RF2	459.422	-1.81443	0.136474	-13.2951	2.47154e-40	5.10963e-39
BICC1	3177.81	-1.03842	0.0781669	-13.2846	2.84313e-40	5.87039e-39
MTMR11	517.086	-1.61717	0.121774	-13.28	3.02268e-40	6.23317e-39
MAPK12	1004.12	-1.35899	0.102345	-13.2785	3.08495e-40	6.35351e-39
NTN4	1084.46	-1.68476	0.126909	-13.2754	3.21759e-40	6.61829e-39
TM7SF2	1050.32	1.35244	0.101928	13.2686	3.52038e-40	7.2228e-39
ZMYND8	2081.77	-1.10084	0.0829652	-13.2687	3.5176e-40	7.2228e-39
ARHGEF6	3258.87	-0.947863	0.0714421	-13.2676	3.56927e-40	7.31384e-39
OTUD3	1726.89	1.03848	0.0783042	13.2622	3.83694e-40	7.85243e-39
RAP1A	3764.66	1.00208	0.0755916	13.2565	4.13561e-40	8.453e-39
CSRNP2	5964.19	0.955257	0.0720825	13.2523	4.37753e-40	8.93622e-39
GJC1	1950.95	1.24545	0.0940398	13.2439	4.89485e-40	9.96719e-39
STXBP2	274.252	-2.13669	0.161334	-13.2439	4.8929e-40	9.96719e-39
P2RX3	590.462	-2.07952	0.157226	-13.2263	6.18453e-40	1.25775e-38
MOV10	1645.88	-1.17471	0.0888205	-13.2256	6.24069e-40	1.26759e-38
ELOVL4	1675.08	1.38006	0.104414	13.2171	6.98637e-40	1.41727e-38
MINPP1	1978.25	1.21498	0.0919278	13.2167	7.03058e-40	1.42446e-38
FZD3	4053.89	1.37076	0.103737	13.2137	7.30912e-40	1.47905e-38
TUBB6	5598.34	-0.988003	0.0747794	-13.2122	7.45833e-40	1.50736e-38
TARS	9277.76	-0.844775	0.0639595	-13.208	7.8945e-40	1.59353e-38
OLA1	8389.31	1.11063	0.0841483	13.1985	8.95178e-40	1.8047e-38
FAM102B	1058.36	1.26334	0.0957771	13.1904	9.96358e-40	2.00619e-38
ANO4	2335.36	1.21013	0.0918026	13.1819	1.11535e-39	2.243e-38
MAN1C1	2890.51	1.15789	0.0878819	13.1756	1.21324e-39	2.43685e-38
C22orf46	1097.12	-1.35291	0.102689	-13.1749	1.22445e-39	2.45631e-38
AGBL5	1364.97	-1.19103	0.0904837	-13.163	1.43349e-39	2.87211e-38
STK32B	297.051	-2.26864	0.172631	-13.1415	1.90428e-39	3.81067e-38
UHRF1BP1	2815.19	-1.00454	0.0764886	-13.1331	2.12652e-39	4.25015e-38
COL14A1	17856.4	-1.14735	0.0873873	-13.1295	2.23029e-39	4.45207e-38
RIN2	646.393	-1.69339	0.128977	-13.1294	2.23509e-39	4.45617e-38
PYGL	4570.5	-0.892314	0.067996	-13.123	2.4299e-39	4.83862e-38
WNT5B	747.202	-2.3777	0.181267	-13.1171	2.62757e-39	5.22583e-38
BEND6	2026.91	1.0424	0.0795445	13.1046	3.10056e-39	6.159e-38
SUN1	7442.68	0.854231	0.0651972	13.1023	3.19575e-39	6.34032e-38
MAN1A1	2993.69	1.3649	0.104257	13.0917	3.67229e-39	7.27688e-38
PRSS23	47238.5	-0.956326	0.0730517	-13.0911	3.7025e-39	7.32778e-38
BCOR	1451.37	-1.0957	0.083731	-13.086	3.96117e-39	7.83018e-38
TIGD7	870.252	-1.28317	0.0982079	-13.0659	5.15765e-39	1.01829e-37
LRRN4CL	151.417	-3.5887	0.274708	-13.0637	5.30993e-39	1.04708e-37
TRIB2	8295.11	0.939666	0.071994	13.052	6.18977e-39	1.2191e-37
HEXB	6604.7	0.92595	0.0709858	13.0442	6.86157e-39	1.34978e-37
PTPRG	11610.7	1.06151	0.0813791	13.044	6.87655e-39	1.35108e-37
DENND6A	1360.11	1.1167	0.0856163	13.0431	6.95483e-39	1.36481e-37
VCAM1	246.266	-2.90485	0.222715	-13.0429	6.97578e-39	1.36727e-37
TOMM40L	430.726	-2.4776	0.190023	-13.0384	7.39514e-39	1.44772e-37
TP53INP2	4185.79	1.06313	0.0815833	13.0312	8.13174e-39	1.59e-37
CHRNA9	133.519	-3.46632	0.2661	-13.0264	8.65883e-39	1.69103e-37
CYCS	9318.68	0.907601	0.0697656	13.0093	1.08358e-38	2.11363e-37
ECHDC2	196.24	-2.86079	0.21994	-13.0071	1.11453e-38	2.17139e-37
BAG4	2139.28	1.16156	0.0893421	13.0013	1.20287e-38	2.34069e-37
DTX3	1457.49	-1.13078	0.0870175	-12.9949	1.30799e-38	2.5422e-37
MTA3	1418.82	-1.55053	0.119395	-12.9866	1.45738e-38	2.82917e-37
KIF5C	14870.9	0.852297	0.0656411	12.9842	1.50405e-38	2.91628e-37
RPRD1A	5025.63	1.14094	0.0880324	12.9604	2.05059e-38	3.97124e-37
COL5A2	88156.2	-1.12815	0.0872956	-12.9233	3.32592e-38	6.43341e-37
ASAP1	6036.69	0.860898	0.0666185	12.9228	3.34722e-38	6.46691e-37
CD97	165.3	-2.88338	0.223367	-12.9087	4.02114e-38	7.7597e-37
MYRF	417.623	-2.04529	0.158468	-12.9066	4.12893e-38	7.95824e-37
FUT8	3761.12	1.0919	0.084766	12.8813	5.73252e-38	1.10359e-36
PKIA	3545.58	0.989701	0.076855	12.8775	6.02546e-38	1.15862e-36
HIST1H2BG	104.381	4.0094	0.311395	12.8756	6.17627e-38	1.18621e-36
NEO1	6688.14	1.06003	0.0823434	12.8733	6.36522e-38	1.22105e-36
TMSB4X	50170.9	0.869521	0.0675644	12.8695	6.68148e-38	1.28021e-36
PTPRE	4119.73	1.13129	0.0879456	12.8636	7.21573e-38	1.38094e-36
PTPRA	7054.44	0.905213	0.0704161	12.8552	8.04218e-38	1.5373e-36
LRP6	6466.28	0.988861	0.0769289	12.8542	8.14444e-38	1.55501e-36
PNPLA2	2650.76	1.18616	0.0922824	12.8536	8.213e-38	1.56626e-36
NRP2	41671.8	1.08263	0.0843301	12.838	1.00457e-37	1.91351e-36
FOXG1	8784.62	1.10105	0.0857705	12.8372	1.01447e-37	1.93012e-36
SGPL1	7200.46	-0.961221	0.0749318	-12.8279	1.14364e-37	2.17332e-36
ARIH1	6922.26	0.953755	0.0743559	12.8269	1.15932e-37	2.20054e-36
THBS2	6355.85	-3.62784	0.282848	-12.8261	1.17123e-37	2.22055e-36
CHST3	10781	-1.42749	0.111374	-12.817	1.31633e-37	2.49273e-36
TRIM38	505.141	-2.0488	0.159857	-12.8164	1.32664e-37	2.50932e-36
CRYAB	1136.53	-1.49962	0.117038	-12.8132	1.38393e-37	2.61465e-36
INPP4A	3837.54	0.885216	0.0692058	12.7911	1.8393e-37	3.47093e-36
SERPINI1	629.747	1.57034	0.122789	12.7889	1.89138e-37	3.56506e-36
LRRC8C	373.048	1.77725	0.139037	12.7825	2.0534e-37	3.86596e-36
TRIP10	1226.5	-1.19644	0.0936335	-12.7779	2.1776e-37	4.09505e-36
CEP78	1398.25	1.0383	0.0812888	12.7729	2.3223e-37	4.3621e-36
NQO1	1774.05	-1.19103	0.0932967	-12.766	2.53797e-37	4.7617e-36
GCLM	2298.07	-1.25938	0.0987045	-12.7591	2.7745e-37	5.19947e-36
ANKRD46	1236.63	1.09102	0.0855853	12.7478	3.208e-37	6.00492e-36
ELFN1	366.044	-2.05163	0.160967	-12.7457	3.29413e-37	6.15903e-36
DZIP1	4901.07	0.896157	0.0703268	12.7427	3.42137e-37	6.38957e-36
TMEM30A	24925.7	1.23415	0.0968787	12.7391	3.58473e-37	6.68697e-36
TLR3	144.907	-6.26259	0.491653	-12.7378	3.64463e-37	6.7909e-36
PPAT	1746.71	1.11251	0.0874063	12.728	4.13338e-37	7.69273e-36
INTU	1090.76	-1.36319	0.107116	-12.7263	4.222e-37	7.84866e-36
CORO2A	475.713	-1.54051	0.121055	-12.7257	4.25838e-37	7.90725e-36
SPTBN5	212.695	-2.45278	0.192759	-12.7246	4.31625e-37	8.00553e-36
ASS1	2622.23	-1.6034	0.126027	-12.7227	4.42547e-37	8.19875e-36
LPIN3	183.07	-3.25419	0.255814	-12.7209	4.52443e-37	8.37252e-36
CCNF	500.77	1.62472	0.127737	12.7192	4.62287e-37	8.54494e-36
RCN2	6681.67	1.11075	0.0873504	12.7161	4.81518e-37	8.89028e-36
AKAP13	10611.8	1.11641	0.0878339	12.7105	5.17338e-37	9.54077e-36
NAV2	3017.28	-0.974203	0.0767333	-12.696	6.22615e-37	1.14693e-35
GABRA5	191.106	-2.3945	0.18868	-12.6908	6.65453e-37	1.22445e-35
FMNL3	6239.96	-1.08683	0.0856526	-12.6888	6.82503e-37	1.2544e-35
KIAA1407	336.028	-1.95471	0.154189	-12.6774	7.88845e-37	1.44821e-35
GPRC5C	132.351	-3.22588	0.254504	-12.6752	8.11587e-37	1.48828e-35
TMEM63A	600.651	-1.37405	0.108413	-12.6742	8.21797e-37	1.5053e-35
MMD	1428.48	1.12913	0.0890923	12.6737	8.27363e-37	1.51379e-35
PRUNE2	11269.1	-0.826825	0.0652593	-12.6698	8.68833e-37	1.58787e-35
POU3F2	10113.7	0.990758	0.0782233	12.6658	9.15289e-37	1.67089e-35
IL4R	353.054	-1.78182	0.140775	-12.6572	1.02069e-36	1.86122e-35
TRANK1	180.554	-2.8109	0.222116	-12.6551	1.04845e-36	1.90969e-35
LPHN3	2098.72	0.974465	0.0770201	12.6521	1.0893e-36	1.98188e-35
ITGB8	9970.07	1.4502	0.114623	12.6519	1.09257e-36	1.98559e-35
GALNT1	12420.5	1.02446	0.0809865	12.6498	1.12158e-36	2.03604e-35
SOWAHC	2538.08	1.18173	0.0934918	12.64	1.27114e-36	2.30495e-35
MAP2K3	1764.27	1.48686	0.117806	12.6213	1.61126e-36	2.91842e-35
CNNM4	1614.82	1.1154	0.0884615	12.6089	1.88563e-36	3.41158e-35
FAXDC2	233.923	-2.29767	0.182265	-12.6062	1.95207e-36	3.52785e-35
MT1F	210.5	2.1622	0.171667	12.5953	2.241e-36	4.04552e-35
CD47	6830.15	0.990299	0.0786512	12.591	2.36618e-36	4.26676e-35
CLIC1	9650.97	-0.775155	0.0616013	-12.5834	2.60467e-36	4.69159e-35
NSD1	4416.31	-0.843935	0.0670985	-12.5775	2.80601e-36	5.04863e-35
PPP1CC	5479.31	1.05043	0.0835317	12.5752	2.88958e-36	5.19325e-35
POU2F2	205.564	-2.27123	0.180896	-12.5555	3.7099e-36	6.65281e-35
ACOT2	320.09	-2.22429	0.177157	-12.5555	3.70915e-36	6.65281e-35
LRPAP1	8199.16	0.972233	0.0774547	12.5523	3.86248e-36	6.91879e-35
PROCR	252.101	-2.555	0.203603	-12.5489	4.03046e-36	7.21173e-35
DNAJC22	217.513	-2.62525	0.209263	-12.5452	4.22204e-36	7.5462e-35
GDPD5	1493.53	1.33337	0.10632	12.5411	4.44779e-36	7.94094e-35
MPP2	1129.76	-1.14545	0.0913472	-12.5395	4.53911e-36	8.09507e-35
CMSS1	1040.58	1.2647	0.100867	12.5383	4.60527e-36	8.20405e-35
PLP2	3856.64	-1.11535	0.0889884	-12.5337	4.88577e-36	8.69421e-35
AFF3	3277.53	-0.926776	0.0739493	-12.5326	4.95178e-36	8.80202e-35
MPHOSPH9	1809.15	0.953438	0.0760804	12.532	4.99012e-36	8.86047e-35
IL17RA	1308.76	-1.46744	0.117213	-12.5194	5.84894e-36	1.0374e-34
PKNOX2	340.074	-1.74221	0.139242	-12.5121	6.41389e-36	1.13637e-34
ZNF280C	772.286	1.31145	0.104886	12.5036	7.13028e-36	1.26191e-34
SMIM14	4919.08	0.946371	0.075702	12.5013	7.34741e-36	1.29892e-34
PHTF2	3909.97	1.38821	0.111075	12.4979	7.66511e-36	1.35361e-34
CHRNA5	333.372	1.82771	0.146283	12.4943	8.01599e-36	1.41404e-34
DGKQ	1355.71	1.23	0.0984733	12.4907	8.38998e-36	1.4784e-34
PPP2R5A	1255.07	1.1582	0.0927344	12.4894	8.52555e-36	1.50066e-34
SLC2A13	2157.5	1.4913	0.119424	12.4874	8.74935e-36	1.53839e-34
RAB36	421.74	-1.6426	0.131558	-12.4858	8.92783e-36	1.56807e-34
CKB	2829.38	1.2491	0.100125	12.4754	1.01679e-35	1.78395e-34
SLC25A4	2544.43	0.984727	0.0789408	12.4742	1.03188e-35	1.80846e-34
FBLN1	2690.46	-1.21916	0.0977735	-12.4692	1.09907e-35	1.92414e-34
CD68	1251.58	1.6183	0.1298	12.4676	1.12202e-35	1.9622e-34
PPAP2A	2929.1	-0.933246	0.0748978	-12.4603	1.22962e-35	2.14807e-34
SYNPO	18293.1	-1.35391	0.108708	-12.4546	1.32071e-35	2.30471e-34
NRBF2	2503.64	-1.0162	0.0817018	-12.4379	1.6274e-35	2.83686e-34
PAIP2	3858.46	0.825859	0.0664013	12.4374	1.63767e-35	2.85168e-34
C3orf52	427.795	1.84917	0.148781	12.4288	1.82356e-35	3.17198e-34
CAB39L	446.58	-1.87073	0.150531	-12.4275	1.85391e-35	3.22132e-34
IL18R1	111.721	-4.02737	0.324223	-12.4216	1.99498e-35	3.46273e-34
GLIS2	2499.12	-1.0966	0.0882871	-12.4209	2.01287e-35	3.49005e-34
CUBN	327.278	-1.94495	0.15662	-12.4183	2.08008e-35	3.60273e-34
ZDHHC3	3937.81	0.83933	0.0676227	12.4119	2.25115e-35	3.89488e-34
GRIK4	103.929	-4.12387	0.332299	-12.4101	2.30281e-35	3.98e-34
FAM3C	3774.24	1.07651	0.0867594	12.408	2.36421e-35	4.08178e-34
CHD1	3172.79	0.9498	0.0765943	12.4004	2.60003e-35	4.48416e-34
FAM13A	836.404	-1.28259	0.103442	-12.3991	2.64377e-35	4.55475e-34
DENND4A	2851.5	0.89525	0.0723795	12.3688	3.85383e-35	6.63243e-34
SPOCD1	1235.25	-1.3903	0.112421	-12.367	3.94334e-35	6.77929e-34
KCNC3	942.565	1.29096	0.104454	12.3591	4.34885e-35	7.46852e-34
DMXL2	2807.61	0.880499	0.0713016	12.3489	4.93652e-35	8.4688e-34
GOT1	2214.81	-1.06702	0.0864514	-12.3424	5.35429e-35	9.1758e-34
FZD8	1066.1	1.48569	0.120424	12.3372	5.71226e-35	9.77893e-34
FAM171B	3800.61	1.15826	0.093926	12.3316	6.11834e-35	1.04631e-33
NRCAM	19934.6	0.982688	0.079693	12.3309	6.17397e-35	1.05471e-33
MRAS	3386.11	-0.945432	0.0766915	-12.3277	6.42275e-35	1.09606e-33
UFSP2	798.547	-1.42012	0.115202	-12.3271	6.46978e-35	1.10292e-33
GLCCI1	879.998	1.14062	0.0925313	12.3268	6.49546e-35	1.10614e-33
PKN1	2742.1	-0.944726	0.0766535	-12.3246	6.67482e-35	1.13549e-33
SH3GL2	421.087	1.69178	0.137375	12.315	7.51885e-35	1.27773e-33
GPR56	980.711	-1.49834	0.12172	-12.3097	8.0319e-35	1.36349e-33
MFSD1	2847.99	-0.918168	0.074618	-12.3049	8.52323e-35	1.44539e-33
STAC	1662.63	-1.031	0.0837891	-12.3047	8.54547e-35	1.44765e-33
TFPI2	306.839	2.99185	0.243178	12.3032	8.71001e-35	1.47398e-33
RNF207	168.626	-2.81123	0.228524	-12.3017	8.86908e-35	1.49934e-33
BTD	1271.4	1.10851	0.0901249	12.2997	9.09243e-35	1.53549e-33
C5orf46	451.252	-1.96572	0.159826	-12.2991	9.15458e-35	1.54438e-33
ERAP1	1432.57	-1.71683	0.139623	-12.2963	9.48764e-35	1.59891e-33
EXOC6	784	1.36391	0.110944	12.2937	9.79359e-35	1.64876e-33
LMO4	6989.82	0.855406	0.0695834	12.2932	9.8467e-35	1.65598e-33
INA	8973.75	1.07587	0.087533	12.291	1.01249e-34	1.701e-33
RCC2	8492.94	-0.921223	0.0749578	-12.2899	1.02648e-34	1.72272e-33
KPNA2	3838.08	0.849056	0.0690991	12.2875	1.05705e-34	1.7722e-33
CNTN2	468.358	-2.07049	0.168561	-12.2833	1.11353e-34	1.86497e-33
TMEM38B	1686.62	1.56146	0.127184	12.2772	1.20115e-34	2.00964e-33
FAM46A	2761.65	-1.10917	0.0903751	-12.273	1.26521e-34	2.11463e-33
KDELC1	1730.41	1.00469	0.0818633	12.2728	1.26819e-34	2.11744e-33
EGF	183.07	-2.39171	0.194911	-12.2708	1.2997e-34	2.16782e-33
DDI2	2936.32	0.919746	0.0749617	12.2695	1.31987e-34	2.1992e-33
GSR	2498.96	0.996958	0.081303	12.2622	1.44441e-34	2.40424e-33
FCGRT	1933.8	-1.21391	0.0990844	-12.2512	1.65446e-34	2.75105e-33
HPCAL1	1413.44	1.09471	0.0893633	12.2501	1.67741e-34	2.78635e-33
SLC5A12	108.6	-4.70207	0.383934	-12.2471	1.74144e-34	2.88976e-33
GXYLT1	3314.61	1.25715	0.102712	12.2396	1.90979e-34	3.16588e-33
TLDC1	1045.26	-1.09879	0.0897941	-12.2368	1.97748e-34	3.27474e-33
PIP4K2A	6276.68	0.79753	0.0652157	12.2291	2.17331e-34	3.59538e-33
CDKN1A	31582.5	-0.969278	0.0793016	-12.2227	2.3519e-34	3.88687e-33
LETM2	439.628	1.54604	0.12668	12.2043	2.94878e-34	4.86834e-33
CASP3	3687.09	0.941865	0.0772069	12.1992	3.13759e-34	5.1748e-33
CASP1	189.762	-2.5442	0.208637	-12.1944	3.32939e-34	5.47999e-33
AGAP2-AS1	226.509	-2.23805	0.183531	-12.1944	3.32917e-34	5.47999e-33
ZBTB11	2439.79	1.05545	0.0865996	12.1877	3.61555e-34	5.94496e-33
MEIS2	13120.9	0.857172	0.0703633	12.1821	3.87227e-34	6.36064e-33
PHIP	6593.84	0.927471	0.0761469	12.18	3.97199e-34	6.51783e-33
TDRP	382.978	-1.72594	0.14173	-12.1777	4.08815e-34	6.70168e-33
ILVBL	1168.59	-1.05209	0.0864941	-12.1637	4.85086e-34	7.94395e-33
PCMT1	3925.98	0.798498	0.0656841	12.1566	5.28843e-34	8.65181e-33
SH3YL1	771.957	-1.62341	0.133587	-12.1524	5.56852e-34	9.10086e-33
KIF16B	508.028	-1.48683	0.122355	-12.1518	5.61287e-34	9.16412e-33
FCHSD1	662.009	-1.32718	0.109262	-12.1468	5.96322e-34	9.72635e-33
PACSIN3	304.586	-1.91993	0.158088	-12.1447	6.12387e-34	9.97835e-33
ACADVL	13282.2	0.740412	0.0609779	12.1423	6.30344e-34	1.02606e-32
EPRS	13066.4	-0.841832	0.0693666	-12.136	6.80856e-34	1.10718e-32
LZTS2	1922.01	-0.938067	0.0773058	-12.1345	6.93366e-34	1.12639e-32
CYB5R4	1157.07	1.08641	0.0895537	12.1314	7.20474e-34	1.16926e-32
SLC18B1	300.587	-2.11794	0.1746	-12.1303	7.30147e-34	1.18377e-32
SLC7A8	248.216	-2.30691	0.190245	-12.126	7.68887e-34	1.24534e-32
TOX2	454.805	-1.81056	0.149363	-12.1219	8.09021e-34	1.30903e-32
TRIM33	4872.06	1.07231	0.0886715	12.0931	1.14884e-33	1.85568e-32
CEP85	1001.43	1.08043	0.0893429	12.0931	1.14915e-33	1.85568e-32
AGTRAP	372.367	-1.75538	0.14517	-12.0919	1.16583e-33	1.88074e-32
AIFM2	573.688	-1.46177	0.120953	-12.0854	1.26128e-33	2.0327e-32
S1PR3	481.511	1.92063	0.159128	12.0697	1.52763e-33	2.45951e-32
THRA	1530.92	-0.972465	0.0806779	-12.0537	1.8551e-33	2.98378e-32
CMBL	965.528	-1.53176	0.127148	-12.047	2.01143e-33	3.23203e-32
C5orf56	116.945	-3.64491	0.302603	-12.0452	2.05581e-33	3.30007e-32
TYK2	1775.99	-0.954825	0.0793496	-12.0331	2.37933e-33	3.81489e-32
PIK3IP1	1648.19	-1.17265	0.0974526	-12.0331	2.38122e-33	3.81489e-32
ZNF697	2080.04	0.951959	0.0791204	12.0318	2.41885e-33	3.87135e-32
RAB3IP	1533.43	0.95818	0.0796563	12.0289	2.50376e-33	4.00331e-32
ANXA4	1761.56	-1.29663	0.107798	-12.0283	2.52225e-33	4.02889e-32
CACUL1	5778.79	0.902332	0.075027	12.0268	2.57038e-33	4.10175e-32
SNN	4076.48	1.02608	0.0853234	12.0257	2.60291e-33	4.14958e-32
S100A10	18030.9	1.08872	0.0905385	12.0249	2.62838e-33	4.18606e-32
NR1D1	535.343	-1.56322	0.130048	-12.0203	2.77909e-33	4.42175e-32
EIF4A3	2539.63	0.941874	0.0783866	12.0158	2.93648e-33	4.66759e-32
MAPK11	1203.76	-1.12654	0.0937666	-12.0143	2.98958e-33	4.74735e-32
TRIM13	1837.57	1.10437	0.0919283	12.0134	3.02177e-33	4.79378e-32
BRD2	17278.5	1.05211	0.0876074	12.0094	3.17249e-33	5.02796e-32
BTG1	5468.25	0.793776	0.0661185	12.0054	3.33051e-33	5.27325e-32
P4HA3	1371.84	-1.11106	0.0926555	-11.9913	3.94834e-33	6.24538e-32
SDC2	15957	1.10069	0.0918517	11.9834	4.34243e-33	6.86205e-32
NSG2	1169.68	-1.59619	0.133203	-11.9832	4.35409e-33	6.87379e-32
HIST1H2BC	183.992	2.40697	0.200899	11.981	4.47109e-33	7.05164e-32
PRDM8	557.852	1.46746	0.12253	11.9763	4.72711e-33	7.44818e-32
STX3	1033.94	1.0571	0.0882989	11.9719	4.98899e-33	7.85318e-32
ZNF605	1349.1	-1.09505	0.0914926	-11.9687	5.1838e-33	8.15193e-32
DAB2	5074.38	-0.898753	0.0751017	-11.9672	5.28113e-33	8.29694e-32
C3orf80	141.05	-2.99935	0.250811	-11.9586	5.85346e-33	9.1795e-32
ARHGEF1	1499.89	-0.964158	0.0806247	-11.9586	5.8542e-33	9.1795e-32
LRP11	2566.7	0.97953	0.0819485	11.953	6.26197e-33	9.80942e-32
DGAT1	778.066	1.2892	0.107872	11.9512	6.39975e-33	1.00156e-31
ENTPD4	9194.44	0.807652	0.0675839	11.9504	6.46486e-33	1.01077e-31
CUX1	7543.04	-0.9049	0.0757567	-11.9448	6.90984e-33	1.0793e-31
DNAJB6	6413.01	0.807848	0.0676429	11.9428	7.07639e-33	1.10426e-31
EPHB4	1955.94	-1.05811	0.0886479	-11.936	7.67852e-33	1.19707e-31
ZSWIM6	5869.04	0.932134	0.0781161	11.9327	7.99567e-33	1.24531e-31
ARHGAP9	96.4394	-4.5981	0.385621	-11.9239	8.88732e-33	1.38286e-31
CYP2U1	1685.91	0.975348	0.0818202	11.9206	9.24023e-33	1.4364e-31
PANK3	12201.8	0.920554	0.0773084	11.9076	1.08095e-32	1.67874e-31
AQP3	217.841	2.62658	0.220589	11.9072	1.08614e-32	1.68518e-31
NINJ2	100.253	-5.23361	0.439769	-11.9008	1.17194e-32	1.81657e-31
MAST4	1276.14	-1.07836	0.09062	-11.8998	1.18611e-32	1.83678e-31
APBA1	2809.52	1.02235	0.0859399	11.8961	1.24078e-32	1.91961e-31
CACFD1	1463.7	1.2257	0.103059	11.8932	1.28435e-32	1.98511e-31
SYTL1	97.6597	-5.00057	0.42056	-11.8903	1.32975e-32	2.05333e-31
ABCD3	4697.99	0.937284	0.0789065	11.8784	1.53254e-32	2.36422e-31
2022-09-05	1251.2	-1.26605	0.106633	-11.873	1.63534e-32	2.52042e-31
HMGN1	13434.4	0.82868	0.0698371	11.8659	1.78011e-32	2.74093e-31
PLAUR	861.248	-1.2496	0.105421	-11.8534	2.0664e-32	3.17873e-31
NOV	769.05	-1.26163	0.106443	-11.8526	2.08544e-32	3.20498e-31
SLC4A3	1435.94	-1.27125	0.107324	-11.845	2.28491e-32	3.50822e-31
WDR26	14047.5	0.809674	0.0683722	11.8421	2.36334e-32	3.6252e-31
KIRREL	26358.2	-0.993428	0.0839109	-11.8391	2.45155e-32	3.75696e-31
FNBP1L	9229.47	0.832351	0.0703128	11.8378	2.48782e-32	3.80895e-31
VKORC1L1	5803.07	0.82968	0.0701184	11.8326	2.64923e-32	4.05225e-31
PLEKHA7	561.612	-1.39635	0.118042	-11.8293	2.75582e-32	4.21132e-31
MTHFD1L	3669.06	-0.939875	0.0794651	-11.8275	2.81354e-32	4.29548e-31
ATP1B2	1169.07	1.40276	0.118608	11.8268	2.83626e-32	4.32609e-31
TGM2	2427.55	-1.31905	0.111539	-11.8259	2.86733e-32	4.36938e-31
GPR162	222.725	-2.43545	0.206031	-11.8208	3.04821e-32	4.64066e-31
WDR63	202.471	-2.3645	0.200123	-11.8153	3.255e-32	4.95083e-31
EMP2	380.293	-1.75857	0.148876	-11.8123	3.37133e-32	5.12298e-31
AHCYL2	2840.92	0.839587	0.0710796	11.8119	3.38678e-32	5.14163e-31
DHRS3	1002.93	-3.39554	0.287484	-11.8112	3.41534e-32	5.17531e-31
CNTN1	5885.81	0.935742	0.0792245	11.8113	3.41376e-32	5.17531e-31
CADM2	1364.78	1.36767	0.115813	11.8092	3.49715e-32	5.29434e-31
C18orf54	669.076	1.4935	0.126679	11.7896	4.41412e-32	6.67631e-31
HSD17B14	183.282	-2.9704	0.251975	-11.7885	4.47478e-32	6.76175e-31
TNFRSF21	1881.55	1.12312	0.0953032	11.7847	4.67834e-32	7.06277e-31
CCT2	7531.62	0.731293	0.0620737	11.7811	4.88796e-32	7.37237e-31
BCKDHB	2033.68	0.986158	0.0837268	11.7783	5.05158e-32	7.61209e-31
ZNF358	367.054	-1.7237	0.146385	-11.7751	5.24576e-32	7.89735e-31
DDX60L	479.249	-1.70841	0.145115	-11.7728	5.38779e-32	8.10366e-31
RANGAP1	3789.57	1.10196	0.0936499	11.7668	5.7881e-32	8.69769e-31
TNRC6C	1867.26	1.04405	0.0887865	11.7591	6.33885e-32	9.51649e-31
NUDT11	1151.5	1.09669	0.0933577	11.7472	7.29956e-32	1.09428e-30
HAX1	2292.41	-1.11385	0.0948188	-11.7472	7.30241e-32	1.09428e-30
GLIS3	5358.52	1.10434	0.0940107	11.7469	7.32197e-32	1.0962e-30
MYO6	4793.28	0.934645	0.0795908	11.7431	7.65936e-32	1.14566e-30
UBTD2	4136.78	0.859536	0.073202	11.742	7.7651e-32	1.1604e-30
FAM65B	1196.41	1.15432	0.098358	11.7359	8.3391e-32	1.24503e-30
AP3B2	1061.12	1.50067	0.127892	11.7339	8.54773e-32	1.27501e-30
CAMTA2	2073.22	-1.07684	0.0918673	-11.7217	9.86328e-32	1.46989e-30
OAS3	101.179	-4.14846	0.354458	-11.7037	1.2207e-31	1.8175e-30
PPP2R1B	2147.43	0.869607	0.074374	11.6924	1.39465e-31	2.07459e-30
PNPLA3	328.539	-1.65864	0.141878	-11.6906	1.42363e-31	2.11577e-30
ALKBH8	527.452	-1.42701	0.122207	-11.677	1.67045e-31	2.4803e-30
GSAP	115.745	-3.10858	0.266425	-11.6677	1.86322e-31	2.764e-30
ANK3	2480.88	-0.908875	0.0779054	-11.6664	1.8928e-31	2.80532e-30
PLIN3	2678.56	-0.87416	0.0749957	-11.6561	2.13514e-31	3.1616e-30
TMEM173	200.217	-2.58505	0.221965	-11.6462	2.39905e-31	3.54916e-30
PIGH	720.3	1.34714	0.115843	11.629	2.93635e-31	4.34008e-30
GOLM1	17812.8	0.818941	0.0704319	11.6274	2.99011e-31	4.41552e-30
CLPP	631.296	-1.63344	0.140496	-11.6262	3.03314e-31	4.47498e-30
PPA1	4307.13	0.769954	0.0662599	11.6202	3.25362e-31	4.79591e-30
LARGE	3279.82	1.02069	0.0878408	11.6198	3.26818e-31	4.81301e-30
SLC40A1	925.478	1.46505	0.126091	11.619	3.30161e-31	4.85783e-30
TRIM25	1560.84	-0.977986	0.0842048	-11.6144	3.48315e-31	5.12029e-30
RNF208	210.205	-2.08661	0.179694	-11.612	3.58004e-31	5.25796e-30
PPP3CB	5164.36	0.79811	0.0687357	11.6113	3.61124e-31	5.29898e-30
SMARCAL1	884.58	-1.19658	0.103057	-11.6108	3.63116e-31	5.32341e-30
CPLX2	550.816	-1.591	0.137112	-11.6036	3.94986e-31	5.78541e-30
NRIP3	886.626	1.09739	0.094592	11.6013	4.05684e-31	5.93673e-30
SKP1	8770.94	0.81952	0.0706467	11.6003	4.10785e-31	6.00597e-30
PEMT	329.728	-1.70409	0.146933	-11.5978	4.22813e-31	6.17627e-30
SSFA2	6092.61	0.986994	0.0851063	11.5972	4.25823e-31	6.21464e-30
NCAM1	13972.9	0.856133	0.0738406	11.5943	4.40219e-31	6.41897e-30
MTMR2	2830	-1.19042	0.102688	-11.5927	4.48858e-31	6.53907e-30
NDFIP2	3114.54	1.38454	0.119492	11.5869	4.80076e-31	6.98759e-30
UBE2L6	1063.96	-1.48883	0.128529	-11.5836	4.9906e-31	7.25739e-30
EXT2	12925.8	0.915988	0.0790811	11.5829	5.03169e-31	7.31058e-30
VPS52	1340.04	-0.999359	0.0862812	-11.5826	5.05044e-31	7.33126e-30
FDXR	1003.58	-1.09255	0.0943474	-11.58	5.20236e-31	7.54505e-30
C4orf32	553.389	1.57185	0.135818	11.5732	5.63311e-31	8.16248e-30
FBXW4	604.757	-1.37798	0.119076	-11.5723	5.69473e-31	8.24441e-30
RAD1	1660.83	0.916526	0.0792973	11.5581	6.71852e-31	9.7179e-30
CDO1	481.794	1.58549	0.137181	11.5576	6.75326e-31	9.75945e-30
HTT	8431.54	0.967165	0.0836868	11.557	6.80773e-31	9.82941e-30
GGPS1	3421.01	0.786041	0.0680493	11.551	7.29251e-31	1.052e-29
NPTX2	623.869	1.4929	0.129275	11.5482	7.53402e-31	1.08588e-29
CDK5RAP2	2566.69	-0.841048	0.0728754	-11.5409	8.20683e-31	1.1818e-29
FBXO33	1149.38	1.20419	0.104374	11.5373	8.56145e-31	1.23177e-29
PRDX5	4659.18	-0.938321	0.0813409	-11.5357	8.72038e-31	1.25353e-29
CS	9712.24	0.779084	0.0675413	11.5349	8.79599e-31	1.26328e-29
CIRBP	21241.9	0.907398	0.0787004	11.5298	9.33945e-31	1.34014e-29
JUN	14687.3	0.927619	0.080493	11.5242	9.9603e-31	1.42797e-29
NFIB	5653.81	0.913547	0.0793016	11.5199	1.04729e-30	1.50013e-29
PLIN2	422.244	-2.16323	0.187803	-11.5186	1.06311e-30	1.52145e-29
MAP3K9	2659.81	1.00941	0.087654	11.5158	1.09773e-30	1.5696e-29
ADPRH	111.816	-3.03452	0.263521	-11.5153	1.10537e-30	1.57915e-29
RAB11A	8740.53	0.872847	0.0758687	11.5047	1.24924e-30	1.7831e-29
PTHLH	1142.51	1.66362	0.144702	11.4968	1.36864e-30	1.95181e-29
SRSF2	5788.39	0.794632	0.0691266	11.4953	1.39295e-30	1.98475e-29
FNBP1	4193.78	0.804067	0.0699693	11.4917	1.45204e-30	2.06712e-29
LAGE3	696.275	1.3274	0.115537	11.489	1.49915e-30	2.13232e-29
PAPLN	214.229	-2.23441	0.194561	-11.4844	1.58081e-30	2.2465e-29
TAX1BP3	6076.84	0.967124	0.0842317	11.4817	1.63014e-30	2.31457e-29
TBC1D16	8205.68	0.912067	0.0794805	11.4754	1.75439e-30	2.48881e-29
FBXO44	917.969	-1.1661	0.101702	-11.4658	1.95956e-30	2.77744e-29
C1orf226	571.722	1.31758	0.114946	11.4626	2.03257e-30	2.87841e-29
IMPDH1	1459.83	-1.02018	0.0891246	-11.4467	2.44233e-30	3.45567e-29
CNTNAP4	158.73	-2.78769	0.24372	-11.4381	2.69802e-30	3.81413e-29
TRIM16L	681.37	-1.32302	0.115682	-11.4366	2.74304e-30	3.87439e-29
CAT	2308.63	0.996569	0.0871398	11.4364	2.74928e-30	3.87984e-29
COL9A2	758.702	-1.36406	0.119289	-11.4349	2.79794e-30	3.94507e-29
MIB1	10270.2	1.10138	0.0963794	11.4275	3.04749e-30	4.29321e-29
ISOC2	927.341	-1.08591	0.0950303	-11.427	3.06516e-30	4.31435e-29
KIAA1462	1238.72	-1.1429	0.100052	-11.4231	3.20758e-30	4.5109e-29
NAGPA	318.233	-1.72616	0.151182	-11.4177	3.41153e-30	4.79356e-29
MXRA8	5936.05	-1.02834	0.0901318	-11.4093	3.75635e-30	5.27351e-29
ZBTB38	3518.57	-0.964824	0.0845661	-11.4091	3.76541e-30	5.28167e-29
BOC	1135.7	-1.11483	0.0977478	-11.4051	3.9413e-30	5.5236e-29
CHST7	563.958	1.35165	0.11856	11.4005	4.15576e-30	5.81914e-29
MID1	4784.31	0.763345	0.0669619	11.3997	4.19589e-30	5.87027e-29
HSP90AA1	77978.4	0.860508	0.0754891	11.3991	4.22393e-30	5.90441e-29
IFIT2	188.248	-3.12227	0.273958	-11.3969	4.33339e-30	6.0522e-29
ENOX1	585.491	1.32942	0.116674	11.3943	4.46325e-30	6.22821e-29
ARHGEF35	87.2123	-4.45361	0.391418	-11.3781	5.37278e-30	7.49097e-29
C6orf48	5043.39	-0.993379	0.0873203	-11.3763	5.48977e-30	7.64751e-29
LAPTM4B	7240.14	0.784941	0.0690164	11.3732	5.68319e-30	7.91016e-29
TMEM66	19088.9	0.689831	0.0606789	11.3685	5.99792e-30	8.34107e-29
CC2D1A	1003.89	-1.18808	0.104524	-11.3665	6.13675e-30	8.52683e-29
PAPD5	1657.82	1.07496	0.0945969	11.3636	6.34842e-30	8.81339e-29
SECISBP2	2297.55	0.925109	0.0814135	11.3631	6.3849e-30	8.85645e-29
CNTLN	449.043	-2.35765	0.20749	-11.3627	6.41026e-30	8.88404e-29
DAP	21690.5	0.920703	0.0810422	11.3608	6.55545e-30	9.07751e-29
MAPKAPK3	841.832	-1.18353	0.104246	-11.3533	7.14164e-30	9.88079e-29
GABRE	344.942	1.76032	0.15507	11.3518	7.26352e-30	1.00409e-28
INPP5B	795.878	-1.13752	0.100218	-11.3505	7.37317e-30	1.01838e-28
RAB11FIP5	3163.31	-0.935976	0.0825041	-11.3446	7.88887e-30	1.08868e-28
IL20RB	109.84	-3.03219	0.267287	-11.3443	7.91356e-30	1.09116e-28
NR2F1	3566.55	1.18417	0.104417	11.3408	8.23568e-30	1.13461e-28
PPTC7	2182.1	0.977772	0.0862233	11.34	8.31521e-30	1.14459e-28
POPDC3	457.57	-1.44842	0.127794	-11.334	8.90441e-30	1.22466e-28
ANKRD50	4716.65	0.933182	0.0824075	11.324	9.98193e-30	1.37169e-28
MYCBP2	11603	0.833638	0.0736466	11.3194	1.05133e-29	1.44349e-28
SEMA5B	277.003	-1.75324	0.15504	-11.3083	1.19385e-29	1.63779e-28
FBXO17	331.625	-1.99456	0.176404	-11.3067	1.21517e-29	1.66562e-28
PCBP4	1649.88	-0.937313	0.0829033	-11.3061	1.22423e-29	1.67663e-28
AK1	1094.06	-1.16236	0.102833	-11.3034	1.263e-29	1.72827e-28
NCEH1	1677.16	1.14255	0.101116	11.2993	1.32223e-29	1.80779e-28
PARP9	713.743	-2.07994	0.184089	-11.2986	1.33355e-29	1.82173e-28
ARHGEF26	2687.01	0.913728	0.0808847	11.2967	1.36279e-29	1.86011e-28
SH3BP2	3115.05	-0.886933	0.0785358	-11.2934	1.41537e-29	1.93025e-28
PFN1	17785.4	-0.803875	0.0711832	-11.293	1.42036e-29	1.93544e-28
ORC4	2086.81	1.01066	0.0895123	11.2907	1.45804e-29	1.98511e-28
CASC10	538.673	-1.28477	0.113795	-11.2903	1.46591e-29	1.99416e-28
WSB2	5664.39	-0.858638	0.0760832	-11.2855	1.54739e-29	2.10323e-28
LCLAT1	909.156	-1.19766	0.106147	-11.283	1.59134e-29	2.16117e-28
SPTSSA	2143.62	1.13717	0.100796	11.282	1.61106e-29	2.18612e-28
BZW1	13510.2	0.720415	0.0638764	11.2783	1.68043e-29	2.27834e-28
TIMP1	4554.73	1.07463	0.095307	11.2755	1.73383e-29	2.34877e-28
CRH	136.686	-2.83223	0.251255	-11.2723	1.79718e-29	2.43256e-28
RGS11	113.59	-3.40404	0.302015	-11.2711	1.82264e-29	2.46497e-28
CHTOP	3899.92	0.738422	0.0655247	11.2694	1.85881e-29	2.51179e-28
ROBO1	12602.7	0.872978	0.0774786	11.2673	1.90209e-29	2.56814e-28
SCMH1	1467.44	-1.00513	0.0892481	-11.2621	2.0178e-29	2.7221e-28
UFC1	1736.99	-1.51044	0.134154	-11.259	2.09176e-29	2.81954e-28
ARC	105.135	3.08219	0.273894	11.2532	2.23339e-29	3.00794e-28
TXNDC15	1999.02	-1.29878	0.115452	-11.2495	2.32863e-29	3.13361e-28
NCBP2	7028.96	0.707949	0.0629358	11.2488	2.34876e-29	3.15778e-28
CASP4	257.75	-2.20935	0.19641	-11.2487	2.35048e-29	3.15778e-28
HSPG2	39705.6	-1.30668	0.1162	-11.2451	2.44821e-29	3.28635e-28
PRND	85.3359	-3.95031	0.351332	-11.2438	2.48367e-29	3.3312e-28
FAH	513.905	-1.42884	0.127145	-11.2379	2.65604e-29	3.55945e-28
CHPF2	8209.19	1.00531	0.0894864	11.2342	2.76905e-29	3.70783e-28
ACTC1	3734.98	-1.14715	0.102221	-11.2222	3.17139e-29	4.24308e-28
NKAIN4	110.044	-3.45951	0.308353	-11.2193	3.27835e-29	4.38256e-28
C12orf49	3099.18	0.804893	0.0717534	11.2175	3.34628e-29	4.46969e-28
CLU	35947.7	1.03709	0.09247	11.2154	3.42467e-29	4.57064e-28
OCEL1	642.475	1.27402	0.1136	11.2149	3.44451e-29	4.59334e-28
PYGO2	2845.89	0.936795	0.0835563	11.2115	3.5793e-29	4.76916e-28
TMEM108	1260.49	-1.03276	0.0921186	-11.2112	3.59462e-29	4.78565e-28
RIPK2	880.995	1.03858	0.0926612	11.2083	3.71194e-29	4.93779e-28
DENND5B	3973.72	0.792209	0.0707326	11.2001	4.07442e-29	5.41555e-28
MYO18A	1898.23	-1.03495	0.0924348	-11.1965	4.2417e-29	5.63327e-28
RALGAPA1	2037.86	0.915154	0.0817434	11.1954	4.29271e-29	5.69345e-28
DST	45178.2	0.899415	0.0803378	11.1954	4.29403e-29	5.69345e-28
AP1S2	13600.8	1.13873	0.101758	11.1905	4.53911e-29	6.01348e-28
RRBP1	19207.9	-1.28462	0.114804	-11.1897	4.58102e-29	6.06407e-28
LGR4	14527.3	-1.21138	0.108264	-11.1891	4.61097e-29	6.09873e-28
KANK2	2235.36	-1.0778	0.0963803	-11.1828	4.94978e-29	6.54153e-28
ANXA1	14616.4	-0.719573	0.0643549	-11.1813	5.03322e-29	6.64639e-28
COL5A1	237422	-1.37023	0.122627	-11.1739	5.46951e-29	7.21665e-28
ST18	87.7949	-4.62681	0.414371	-11.1659	5.99022e-29	7.89727e-28
EDEM3	7941.59	1.1561	0.103552	11.1644	6.08687e-29	8.01816e-28
CSGALNACT1	446.207	-1.36599	0.122359	-11.1638	6.12864e-29	8.06665e-28
RAB27A	1221.89	-1.16182	0.104119	-11.1586	6.50418e-29	8.55399e-28
LRRC55	95.7289	-3.60344	0.322962	-11.1575	6.58376e-29	8.65165e-28
ASAP3	1439.51	-1.08272	0.0970571	-11.1555	6.73325e-29	8.84093e-28
G3BP1	11702	0.845091	0.0757896	11.1505	7.1215e-29	9.34316e-28
ARRDC2	163.479	-2.55287	0.229002	-11.1478	7.34191e-29	9.62454e-28
GPC4	12747.7	0.69901	0.0627796	11.1343	8.53774e-29	1.11831e-27
MNS1	237.086	-2.37706	0.213723	-11.1222	9.78689e-29	1.2809e-27
SMOC2	195.776	-2.2498	0.202353	-11.1182	1.02309e-28	1.33793e-27
MAGED2	10291.1	-0.849184	0.0764384	-11.1094	1.12927e-28	1.4756e-27
SLC4A10	150.184	-2.99774	0.269859	-11.1085	1.14012e-28	1.48858e-27
SEC24D	7095.38	-0.852116	0.0767198	-11.1069	1.16164e-28	1.51546e-27
SMCO3	86.1576	-4.14885	0.373579	-11.1057	1.17726e-28	1.53337e-27
TIMELESS	803.37	1.14154	0.102789	11.1057	1.17699e-28	1.53337e-27
FGD6	1640.9	0.947038	0.0852943	11.1032	1.21048e-28	1.57538e-27
NABP2	1139.79	-1.01015	0.0909805	-11.1029	1.21469e-28	1.57959e-27
COL4A6	735.145	-1.17266	0.105656	-11.0989	1.27034e-28	1.65063e-27
SELT	6356.8	1.08904	0.0981501	11.0957	1.31623e-28	1.70888e-27
STIP1	9835.61	0.838833	0.0756043	11.095	1.32597e-28	1.72015e-27
PARP14	1435.72	-2.97205	0.2679	-11.0939	1.34338e-28	1.74135e-27
HIGD1A	7190.28	0.740596	0.0667843	11.0894	1.41274e-28	1.8298e-27
USP38	3369.27	0.920237	0.0830042	11.0866	1.45673e-28	1.88527e-27
IFITM10	845.951	-1.21455	0.109571	-11.0846	1.49059e-28	1.92755e-27
DGKI	3610.27	0.937515	0.0846181	11.0794	1.57971e-28	2.04118e-27
SPTLC2	5921.65	0.895404	0.080941	11.0624	1.90855e-28	2.46411e-27
GALNT18	388.002	1.56976	0.141903	11.0622	1.9138e-28	2.46892e-27
ITSN1	4307.63	0.718431	0.0649714	11.0576	2.01311e-28	2.59498e-27
ELAVL3	2965.36	0.888656	0.0803677	11.0574	2.0194e-28	2.60102e-27
PHLPP2	2179.47	0.931453	0.0842481	11.0561	2.04887e-28	2.63689e-27
S100A2	110.546	-3.03777	0.274784	-11.0551	2.07008e-28	2.66207e-27
CEP112	437.579	-1.48705	0.134544	-11.0525	2.13234e-28	2.73996e-27
AMD1	3249.22	0.938414	0.0849255	11.0499	2.19581e-28	2.81929e-27
TAC1	1917.44	-1.07065	0.0968947	-11.0496	2.20176e-28	2.82469e-27
NCOA6	2259.07	-0.933503	0.0844887	-11.0488	2.22066e-28	2.8467e-27
GSTM1	123.115	-3.15063	0.285156	-11.0488	2.22262e-28	2.84695e-27
IRS1	5297.29	-1.06277	0.096212	-11.0462	2.28817e-28	2.92861e-27
EIF2AK2	4155.53	-1.02022	0.0924076	-11.0404	2.44e-28	3.12047e-27
LACC1	263.329	-1.95091	0.176712	-11.0401	2.44847e-28	3.12883e-27
IRAK1	2258.2	-0.876756	0.0794424	-11.0364	2.55121e-28	3.25756e-27
PRKAB2	5587.7	-0.754046	0.0683292	-11.0355	2.57657e-28	3.28735e-27
ME1	2298.86	-1.47586	0.133745	-11.0349	2.59328e-28	3.30608e-27
DMGDH	122.941	-2.90163	0.263118	-11.0279	2.80374e-28	3.57158e-27
MCU	2591.82	0.78782	0.0714541	11.0255	2.87811e-28	3.66344e-27
PHLDA3	3452.32	-0.951201	0.0863475	-11.016	3.20093e-28	4.07116e-27
FZD7	3520.22	1.09322	0.0993581	11.0028	3.70484e-28	4.70837e-27
C19orf44	281.08	-1.66013	0.150928	-10.9995	3.84438e-28	4.88188e-27
SUMO2	5015.14	0.7986	0.0726424	10.9936	4.10329e-28	5.20659e-27
DNMBP	1913.84	0.997378	0.0907432	10.9912	4.21223e-28	5.34064e-27
SEMA3A	1482.08	-1.59486	0.145109	-10.9908	4.23082e-28	5.36003e-27
ABHD4	3529.69	-0.871407	0.079296	-10.9893	4.30279e-28	5.44696e-27
HES6	240.314	1.73507	0.157936	10.9859	4.46675e-28	5.65011e-27
SYNJ1	2109.66	0.862063	0.0784917	10.9829	4.62043e-28	5.83995e-27
CARD10	705.565	-1.33934	0.121961	-10.9818	4.6775e-28	5.90749e-27
RALGAPA2	1955.84	0.998766	0.0909519	10.9813	4.70335e-28	5.93552e-27
FGFR2	558.332	-1.27618	0.116281	-10.9749	5.044e-28	6.35994e-27
INPP4B	1284.55	-1.21768	0.110952	-10.9749	5.04751e-28	6.35994e-27
TLR6	113.104	-2.83704	0.258531	-10.9737	5.11273e-28	6.43712e-27
TLN2	9810.61	0.918479	0.0837087	10.9723	5.19238e-28	6.53234e-27
AJUBA	2788.77	-0.805977	0.0734649	-10.9709	5.27358e-28	6.62935e-27
JAZF1	1136.15	-1.53191	0.139662	-10.9687	5.40201e-28	6.78555e-27
CASC5	168.604	2.1104	0.192417	10.9678	5.45762e-28	6.85009e-27
SNUPN	596.883	-1.2905	0.117703	-10.964	5.69395e-28	7.1412e-27
SNX25	1315.1	1.05618	0.0963436	10.9627	5.77811e-28	7.24115e-27
TGFBI	222655	-0.857553	0.0782285	-10.9621	5.8107e-28	7.27637e-27
NDST2	1657.53	1.01332	0.0925073	10.954	6.35799e-28	7.95557e-27
TIAM1	1233.13	1.20118	0.109709	10.9488	6.73054e-28	8.41525e-27
GABRG3	380.624	-1.58716	0.144998	-10.9461	6.94011e-28	8.6706e-27
FHOD3	5499.68	0.843454	0.0770563	10.946	6.94825e-28	8.67409e-27
UBE2G1	4975.59	0.747035	0.0682521	10.9452	7.00459e-28	8.7377e-27
TSHZ2	690.521	-1.11263	0.101676	-10.943	7.18224e-28	8.95242e-27
CMTM6	7745.49	0.95522	0.087349	10.9357	7.78216e-28	9.69276e-27
HLA-B	13472.4	-0.846598	0.077427	-10.9341	7.9145e-28	9.85003e-27
MCPH1	634.939	-1.67057	0.152827	-10.9311	8.18303e-28	1.01764e-26
DIRAS1	1327.13	-1.06004	0.0970209	-10.9259	8.66505e-28	1.07676e-26
HOMER1	2264.81	1.04913	0.0960328	10.9247	8.78592e-28	1.09095e-26
MT-ND5	303904	0.988284	0.0905006	10.9202	9.2302e-28	1.14524e-26
MICU2	2785.47	0.950903	0.0870791	10.92	9.25094e-28	1.14693e-26
PLOD1	27525.3	-0.885922	0.0811296	-10.9198	9.26644e-28	1.14798e-26
STMN1	7850.53	0.85128	0.0780384	10.9085	1.05003e-27	1.29984e-26
FAM122A	1535.79	1.00242	0.0919664	10.8998	1.15482e-27	1.42847e-26
BMP6	176.279	2.17497	0.199598	10.8967	1.19448e-27	1.47641e-26
SERBP1	20945.2	0.810105	0.0743712	10.8927	1.24849e-27	1.54199e-26
METAP1D	297.954	-1.69598	0.155751	-10.889	1.30049e-27	1.605e-26
PORCN	389.055	-1.69121	0.155399	-10.883	1.38862e-27	1.71245e-26
SKI	8611.46	0.989928	0.0909724	10.8816	1.41013e-27	1.73766e-26
SYK	84.0707	-3.95961	0.363937	-10.8799	1.43676e-27	1.76913e-26
ZNF28	1534.82	0.947468	0.0871216	10.8752	1.51249e-27	1.86097e-26
TMEM206	1032.75	0.980521	0.0902051	10.8699	1.60361e-27	1.97159e-26
ACKR3	1881.69	-3.02218	0.27808	-10.868	1.63677e-27	2.01083e-26
INTS7	1326.92	0.909726	0.0837444	10.8631	1.7272e-27	2.12032e-26
PTCHD2	198.78	1.91302	0.176199	10.8571	1.8447e-27	2.26286e-26
HABP4	2964.82	0.884418	0.0814821	10.8541	1.90585e-27	2.33611e-26
NR6A1	612.528	1.31713	0.12136	10.853	1.9291e-27	2.36283e-26
LAMP2	18127.6	0.94721	0.0872773	10.8529	1.93227e-27	2.36491e-26
TTYH1	135.077	-2.63482	0.242914	-10.8467	2.06785e-27	2.52895e-26
ABHD14B	765.291	-1.06459	0.0981568	-10.8458	2.08782e-27	2.55144e-26
RALGPS2	1157.43	1.09844	0.101306	10.8428	2.15818e-27	2.63545e-26
FHOD1	402.749	-1.4299	0.131983	-10.834	2.37588e-27	2.89911e-26
CERS6	7763.92	0.872308	0.0805213	10.8332	2.39501e-27	2.92026e-26
LEPREL1	1514.28	1.11993	0.103406	10.8304	2.4719e-27	3.01175e-26
CLCF1	836.29	1.45506	0.134353	10.8301	2.47812e-27	3.0148e-26
TRIM24	2967.73	0.754627	0.0696782	10.8302	2.47652e-27	3.0148e-26
RAB11FIP3	3366.72	0.881356	0.0814184	10.825	2.62024e-27	3.18531e-26
INPPL1	5034.73	-0.760003	0.0702256	-10.8223	2.69908e-27	3.2787e-26
RHOBTB1	2013.02	-1.14048	0.105401	-10.8203	2.75784e-27	3.34757e-26
TMEM54	174.878	-2.25152	0.208171	-10.8157	2.89915e-27	3.51647e-26
GYG1	1847.68	0.964811	0.0892146	10.8145	2.9389e-27	3.56201e-26
PIGX	1240.48	0.927721	0.085794	10.8134	2.9758e-27	3.60405e-26
KIAA0754	3629.6	1.03697	0.0959102	10.8118	3.02528e-27	3.66124e-26
CBS	1545.35	-3.61981	0.335005	-10.8052	3.25112e-27	3.93163e-26
FAM13B	4154.1	0.777848	0.0719889	10.8051	3.25603e-27	3.93463e-26
CA12	1638.03	-1.02219	0.0946169	-10.8035	3.3134e-27	4.00098e-26
MMP14	70541	-1.04999	0.0971955	-10.8028	3.33795e-27	4.02762e-26
ABCA12	79.1053	-4.99812	0.462856	-10.7984	3.50125e-27	4.22153e-26
MVB12B	646.882	-1.32823	0.123009	-10.7979	3.52299e-27	4.24459e-26
KIAA1614	112.22	-2.76571	0.256161	-10.7968	3.56483e-27	4.29181e-26
CHSY3	1351.87	1.0117	0.0937257	10.7942	3.66483e-27	4.40893e-26
ANTXR1	18967.7	0.943074	0.0873817	10.7926	3.73165e-27	4.48599e-26
ATF5	1507.57	-0.892327	0.0826863	-10.7917	3.76677e-27	4.52486e-26
GMIP	428.43	-1.47569	0.13681	-10.7864	3.9906e-27	4.79019e-26
ATP6V0E2	3079.93	1.01122	0.0938155	10.7788	4.33466e-27	5.19935e-26
SFXN4	323.649	-1.5585	0.144602	-10.7779	4.37644e-27	5.24558e-26
PLCL2	319.919	-1.50647	0.139787	-10.7769	4.42337e-27	5.29792e-26
BEAN1	271.637	-1.68175	0.156096	-10.7738	4.57807e-27	5.47917e-26
RIN3	84.3471	-3.63834	0.33786	-10.7688	4.83353e-27	5.78065e-26
UNKL	755.91	-1.08087	0.100374	-10.7685	4.85024e-27	5.79636e-26
EPT1	5004.49	0.906782	0.0842287	10.7657	4.99721e-27	5.9676e-26
SRPK1	2949.4	0.752247	0.0699468	10.7546	5.64061e-27	6.73099e-26
ZEB2	2065.25	-0.950254	0.0884067	-10.7487	6.01259e-27	7.16961e-26
BRCA1	298.244	-1.7989	0.167373	-10.7479	6.06484e-27	7.2266e-26
MMACHC	195.433	-1.93426	0.179969	-10.7478	6.0716e-27	7.22935e-26
SLC25A23	3303.17	-0.760157	0.0707532	-10.7438	6.33978e-27	7.54313e-26
CASC4	13288	0.969695	0.0902694	10.7422	6.44661e-27	7.66461e-26
CRYZ	859.266	-1.15414	0.107443	-10.7419	6.47029e-27	7.68713e-26
ISL1	1312.47	1.11162	0.103525	10.7378	6.76626e-27	8.03289e-26
LAMC1	90701.7	1.06711	0.099418	10.7336	7.08203e-27	8.40163e-26
DIAPH2	300.322	-1.79206	0.167006	-10.7305	7.31696e-27	8.67399e-26
NME4	1539.59	-1.57146	0.146588	-10.7203	8.17817e-27	9.68785e-26
HPS4	1536	-0.908877	0.0847998	-10.7179	8.3873e-27	9.92834e-26
SLC25A39	3575.57	0.774367	0.0722738	10.7143	8.71682e-27	1.03109e-25
LMF1	518.93	-1.41699	0.13227	-10.7128	8.86039e-27	1.04731e-25
HMGB3	3625.46	0.802733	0.0749818	10.7057	9.56901e-27	1.13024e-25
LIF	13230	1.39284	0.130108	10.7052	9.61966e-27	1.1354e-25
FAM117B	1187.64	0.942222	0.0880393	10.7023	9.92885e-27	1.17104e-25
PIGM	2256.81	1.05915	0.0989767	10.701	1.00671e-26	1.18649e-25
TMTC1	5659.05	0.858982	0.0803043	10.6966	1.05583e-26	1.24347e-25
SRSF7	3233.83	0.759038	0.0710027	10.6903	1.13046e-26	1.3304e-25
STRADA	1851.44	0.926764	0.086697	10.6897	1.13757e-26	1.33779e-25
GSDMD	204.587	-2.03159	0.190105	-10.6867	1.17532e-26	1.3812e-25
DENND1B	535.632	-1.36974	0.128185	-10.6856	1.18822e-26	1.39535e-25
BRSK1	1336.84	-0.936667	0.0876782	-10.683	1.22247e-26	1.43452e-25
MYO5C	159.321	-2.41364	0.226024	-10.6787	1.28059e-26	1.50164e-25
CD274	540.585	-1.25537	0.117593	-10.6756	1.32457e-26	1.55209e-25
ARHGAP22	323.626	-1.62712	0.152436	-10.6741	1.34513e-26	1.57504e-25
TSPAN14	4244.22	0.84565	0.0792251	10.674	1.34692e-26	1.576e-25
ASNS	10772.5	-0.741263	0.0694723	-10.6699	1.40778e-26	1.64603e-25
GMCL1	1854.61	1.2127	0.113665	10.6691	1.41961e-26	1.65866e-25
SESN2	4732.38	-1.04063	0.09758	-10.6644	1.49314e-26	1.74332e-25
COL27A1	877.908	-1.19692	0.11226	-10.6621	1.5317e-26	1.78706e-25
MX1	237.357	-2.55187	0.239496	-10.6552	1.64909e-26	1.92264e-25
OXCT1	2573.61	-0.852257	0.0799899	-10.6545	1.66046e-26	1.9345e-25
DESI2	5166.33	0.875056	0.0821401	10.6532	1.68457e-26	1.96118e-25
LYST	1989.79	0.854159	0.0801942	10.6511	1.72263e-26	2.00406e-25
ID3	1735	0.897281	0.0842521	10.65	1.7445e-26	2.02804e-25
TSPAN13	3952.75	0.85931	0.0807011	10.6481	1.7803e-26	2.06818e-25
MEGF11	1473.88	1.07539	0.101018	10.6456	1.82852e-26	2.12268e-25
YWHAE	36052.4	0.673186	0.0632467	10.6438	1.86373e-26	2.16201e-25
NEDD9	14007.3	0.766547	0.0720772	10.6351	2.04669e-26	2.37255e-25
CACNA1D	304.71	-1.63951	0.154184	-10.6335	2.08202e-26	2.41179e-25
IDS	25525.8	0.693765	0.0652826	10.6271	2.22909e-26	2.58031e-25
TNFAIP3	431.42	-1.31878	0.124123	-10.6248	2.285e-26	2.64314e-25
CTNNB1	31042.6	0.703891	0.0662535	10.6242	2.29956e-26	2.65809e-25
VASN	4779.14	1.14109	0.107417	10.623	2.33036e-26	2.69177e-25
SIK2	5392.16	0.814292	0.0767748	10.6062	2.78727e-26	3.21725e-25
CLDND1	3572.41	0.813232	0.0766886	10.6043	2.84457e-26	3.28106e-25
UBXN11	233.148	-1.74997	0.165036	-10.6036	2.86711e-26	3.30471e-25
SLC39A11	423.057	-1.42906	0.134842	-10.5981	3.04184e-26	3.50362e-25
CUL7	2491.01	-0.816992	0.0770917	-10.5977	3.0552e-26	3.51651e-25
SCARB2	30914.4	0.702714	0.0663163	10.5964	3.09675e-26	3.56181e-25
LIFR	8815.63	0.819956	0.0773816	10.5963	3.10124e-26	3.56445e-25
TBL1X	1271.28	-0.893206	0.0843014	-10.5954	3.13035e-26	3.59536e-25
PFKFB4	2527.99	-0.920633	0.0869312	-10.5904	3.30282e-26	3.79077e-25
YWHAQ	28715.4	0.714403	0.0674846	10.5862	3.45467e-26	3.96225e-25
CDH4	3661.51	0.934539	0.0882898	10.5849	3.50161e-26	4.01325e-25
NSMAF	1597.86	-0.836538	0.0790486	-10.5826	3.58941e-26	4.11097e-25
CEBPG	2769.45	-0.921885	0.0871942	-10.5728	3.98501e-26	4.56084e-25
RCOR1	3502.26	0.82053	0.0776171	10.5715	4.03957e-26	4.62003e-25
PKD2	4922.1	0.867119	0.0820255	10.5713	4.04726e-26	4.62556e-25
SYNGAP1	1946.31	-0.921478	0.0871988	-10.5676	4.2131e-26	4.81171e-25
TRIM36	1739.39	0.926454	0.0876766	10.5667	4.2509e-26	4.85147e-25
SLC16A4	785.628	-1.4193	0.134369	-10.5627	4.43521e-26	5.05825e-25
EFEMP1	14456	0.80291	0.0760251	10.5611	4.51245e-26	5.14274e-25
CHST6	160.668	-2.19319	0.207777	-10.5555	4.79041e-26	5.45569e-25
ROBO3	127.722	-2.57786	0.24423	-10.5551	4.81331e-26	5.47793e-25
C8orf4	196.324	-2.20908	0.209368	-10.5512	5.01537e-26	5.70388e-25
ADARB1	1555.07	0.99175	0.0940461	10.5454	5.33639e-26	6.06473e-25
PEF1	1440.44	-1.00977	0.0957823	-10.5423	5.51111e-26	6.25891e-25
PPP6R3	5592.86	0.738598	0.0700833	10.5389	5.71914e-26	6.49062e-25
PIRT	91.9134	-3.85059	0.365696	-10.5295	6.31906e-26	7.16646e-25
COL4A5	7243.69	-0.880449	0.083642	-10.5264	6.5288e-26	7.39915e-25
NIN	6186.1	0.848051	0.0806002	10.5217	6.86229e-26	7.77168e-25
C4A	174.218	-2.08666	0.198352	-10.52	6.98918e-26	7.90986e-25
NRP1	10261.7	-0.650587	0.0618762	-10.5143	7.4205e-26	8.39214e-25
HIVEP3	2072.82	1.37802	0.131085	10.5124	7.5741e-26	8.5599e-25
RBM43	506.136	-1.71164	0.162848	-10.5107	7.71422e-26	8.71219e-25
JPH4	628.258	-1.37371	0.130733	-10.5077	7.9607e-26	8.98429e-25
LGALS1	12986.9	-0.981867	0.0934472	-10.5072	8.00512e-26	9.02815e-25
PMEPA1	71372.9	0.916943	0.0872842	10.5053	8.16945e-26	9.20708e-25
TFEB	229.443	-1.80226	0.17156	-10.5051	8.18111e-26	9.21383e-25
KCNG1	399.601	-1.71795	0.163687	-10.4953	9.0744e-26	1.02128e-24
FSD1	348.03	-1.46002	0.139128	-10.4941	9.19807e-26	1.03448e-24
ACTG1	265850	0.922542	0.0879279	10.492	9.3987e-26	1.05631e-24
ARHGEF37	306.601	-1.5946	0.151989	-10.4916	9.44297e-26	1.06055e-24
G0S2	75.4406	-4.90052	0.467238	-10.4883	9.78088e-26	1.09774e-24
ZFP64	698.029	-1.12761	0.107551	-10.4844	1.01881e-25	1.14265e-24
FBXO41	745.889	-1.33695	0.127526	-10.4838	1.02538e-25	1.14923e-24
CCPG1	20229.5	-1.04219	0.0994494	-10.4796	1.07183e-25	1.20047e-24
ZBTB47	1158.04	-0.918251	0.0876949	-10.471	1.17432e-25	1.31435e-24
LRRC20	896.12	1.14768	0.10963	10.4687	1.20312e-25	1.34565e-24
CCDC176	463.36	-1.29541	0.123753	-10.4677	1.21554e-25	1.35861e-24
CBX2	308.406	1.51079	0.144334	10.4673	1.22074e-25	1.36348e-24
RNF114	3253.92	0.744361	0.0711524	10.4615	1.29773e-25	1.44848e-24
CHCHD6	448.322	-1.36144	0.130139	-10.4614	1.29893e-25	1.44882e-24
INTS8	2040.26	0.901673	0.0862085	10.4592	1.32955e-25	1.48196e-24
SLC22A18	184.33	-2.00289	0.191519	-10.4579	1.34832e-25	1.50184e-24
WWC3	2169.07	0.850697	0.0813568	10.4564	1.37008e-25	1.52503e-24
MKS1	435.973	-1.31882	0.126129	-10.4561	1.37402e-25	1.52838e-24
FXR2	4098.11	0.926352	0.0886183	10.4533	1.41549e-25	1.57342e-24
CRK	8191.29	0.698044	0.0667793	10.453	1.41963e-25	1.57695e-24
ST6GALNAC3	330.948	1.53573	0.146957	10.4502	1.46258e-25	1.62355e-24
KLHL24	4641.94	1.01175	0.0968292	10.4488	1.48341e-25	1.64555e-24
ARHGAP23	3393.83	-0.905771	0.0867205	-10.4447	1.54925e-25	1.71741e-24
DCT	204.28	-1.96221	0.187896	-10.4431	1.57633e-25	1.74622e-24
PAXBP1	2566.54	0.904892	0.0866598	10.4419	1.59602e-25	1.76684e-24
MARS2	521.986	1.46994	0.140776	10.4416	1.60016e-25	1.77022e-24
METTL9	6461.3	0.674057	0.064593	10.4355	1.70796e-25	1.88818e-24
PANX2	120.576	-2.66425	0.255463	-10.4291	1.82631e-25	2.01764e-24
ZNF445	3217.41	0.812973	0.0780076	10.4217	1.97364e-25	2.17892e-24
CHRM3	1148.83	-1.11711	0.107226	-10.4183	2.04557e-25	2.25681e-24
FAM118B	1422.12	0.910102	0.0874007	10.413	2.16328e-25	2.38505e-24
PNPLA8	3039.48	0.792552	0.0761147	10.4126	2.17215e-25	2.3932e-24
MT1E	157.096	2.07078	0.199051	10.4032	2.39623e-25	2.6383e-24
ACOX2	75.064	-4.11764	0.39584	-10.4023	2.42075e-25	2.66348e-24
COL8A1	79824.6	-0.904542	0.086958	-10.402	2.42662e-25	2.66813e-24
ZNF573	162.81	-2.11806	0.203755	-10.3951	2.60902e-25	2.86674e-24
BMP2K	1813.24	0.902663	0.0868705	10.3909	2.72734e-25	2.99473e-24
MTF2	1707.74	0.921532	0.088692	10.3903	2.74625e-25	3.01345e-24
MAP4K2	366.401	-1.37361	0.132253	-10.3862	2.86453e-25	3.14111e-24
PCDH1	4093.73	-1.31151	0.126347	-10.3802	3.05287e-25	3.34538e-24
MAPK8IP3	4818.54	0.843649	0.0812884	10.3785	3.10716e-25	3.40258e-24
SLC35A1	1595.82	1.01795	0.0981046	10.3762	3.18223e-25	3.48243e-24
PIDD	515.822	-1.20491	0.116137	-10.3749	3.22622e-25	3.52819e-24
TRAF3IP2	728.457	-1.058	0.102028	-10.3696	3.40799e-25	3.72446e-24
GMPPA	1036.38	-1.04874	0.10116	-10.3671	3.49826e-25	3.82055e-24
EXOC6B	4531.24	0.76409	0.0737189	10.3649	3.581e-25	3.90828e-24
EML3	887.382	-1.11393	0.107475	-10.3645	3.59682e-25	3.9229e-24
SOX12	3448.57	-0.902534	0.0871377	-10.3576	3.86669e-25	4.2144e-24
SCGN	78.7343	-3.87704	0.374404	-10.3552	3.96228e-25	4.31569e-24
TNFSF10	73.5173	-5.0225	0.485033	-10.355	3.97246e-25	4.32388e-24
REC8	1161.38	1.04306	0.100766	10.3513	4.12981e-25	4.49213e-24
NXF1	4647.33	0.802986	0.0775905	10.349	4.22726e-25	4.59506e-24
B4GALT2	2621.4	-0.862639	0.0833911	-10.3445	4.43196e-25	4.81434e-24
ZNF710	331.138	-1.43667	0.138886	-10.3442	4.44494e-25	4.82522e-24
FBXO32	4527.33	-0.770846	0.0745367	-10.3418	4.55757e-25	4.94417e-24
NPEPL1	499.078	-1.81992	0.176144	-10.332	5.05177e-25	5.47663e-24
ELOVL5	10971.3	0.825019	0.0798807	10.3281	5.2574e-25	5.69575e-24
OSCAR	73.0652	-4.8078	0.465804	-10.3215	5.63329e-25	6.0989e-24
PCYT2	1649.74	0.948208	0.0918704	10.3211	5.65467e-25	6.11798e-24
EZR	8802.79	0.80278	0.0778001	10.3185	5.81263e-25	6.28469e-24
SGCE	1523.98	-1.00362	0.0972725	-10.3177	5.8638e-25	6.33579e-24
DOK4	992.955	-0.989073	0.0958658	-10.3173	5.88709e-25	6.35673e-24
STK39	3120.11	0.751302	0.0728245	10.3166	5.92843e-25	6.39711e-24
SELRC1	473.09	-1.34039	0.129932	-10.316	5.96309e-25	6.43023e-24
TMEM170A	1068.79	0.927148	0.0898831	10.315	6.02564e-25	6.49337e-24
EXT1	6012.04	0.847204	0.0821503	10.3129	6.16423e-25	6.63831e-24
RBMS1	11060	0.836387	0.0811154	10.3111	6.27893e-25	6.75734e-24
NFKBIZ	1241.64	0.93106	0.0903901	10.3005	7.01189e-25	7.54116e-24
SLC38A7	1944.51	-0.818234	0.0794468	-10.2991	7.10972e-25	7.6413e-24
CBR4	1377.54	0.989959	0.0961213	10.2991	7.11562e-25	7.64259e-24
AUTS2	8617.72	0.833238	0.0809367	10.2949	7.42706e-25	7.9718e-24
NNMT	7759.12	-0.860931	0.0836563	-10.2913	7.71379e-25	8.2741e-24
TMPO	1458.89	1.09362	0.106303	10.2878	8.00112e-25	8.57663e-24
OPLAH	132.825	-2.3906	0.232383	-10.2874	8.03519e-25	8.60747e-24
TIMP2	29843.5	-0.793903	0.0772162	-10.2816	8.53364e-25	9.13538e-24
RBBP8	1677.51	-1.03595	0.100893	-10.2678	9.84256e-25	1.05297e-23
IMPAD1	15692	0.932555	0.0908543	10.2643	1.02076e-24	1.0913e-23
WDR81	854.846	-1.02578	0.0999445	-10.2635	1.02919e-24	1.09959e-23
INHBB	375.544	-4.0192	0.391958	-10.2542	1.13366e-24	1.2104e-23
LYSMD1	439.298	-1.3348	0.130199	-10.252	1.15921e-24	1.23687e-23
CEP41	828.612	-1.20892	0.117957	-10.2489	1.19759e-24	1.27698e-23
DNM3	2442.74	0.812142	0.0792847	10.2434	1.26759e-24	1.35073e-23
VWA1	7785.8	-1.0829	0.105721	-10.243	1.27228e-24	1.35484e-23
MCOLN1	900.239	1.04655	0.102196	10.2407	1.30343e-24	1.3871e-23
DIXDC1	2912.52	-0.738105	0.072099	-10.2374	1.34843e-24	1.43405e-23
P4HA2	13141.8	-0.767155	0.0749515	-10.2354	1.3769e-24	1.46337e-23
GALC	1324.09	-1.46229	0.142894	-10.2334	1.4057e-24	1.493e-23
SPOCK2	1111.19	-1.24421	0.121588	-10.233	1.41012e-24	1.49672e-23
B2M	21988.6	0.768671	0.0751182	10.2328	1.41349e-24	1.49931e-23
BOK	1964.24	-0.998411	0.0975767	-10.2321	1.42465e-24	1.51016e-23
RARRES2	75.8092	-3.78203	0.369788	-10.2275	1.49248e-24	1.58104e-23
LARS	8651.15	-0.67952	0.0664735	-10.2224	1.57346e-24	1.66573e-23
STK3	988.859	1.03019	0.100799	10.2203	1.60912e-24	1.70238e-23
NSMCE1	1093.75	-0.919128	0.089944	-10.2189	1.6318e-24	1.72525e-23
ZNF664	13316.1	0.67967	0.0665138	10.2185	1.6389e-24	1.73162e-23
PDE4A	147.576	-2.74862	0.26902	-10.2172	1.66129e-24	1.75413e-23
ADORA2B	187.683	-2.06247	0.201948	-10.2129	1.73565e-24	1.83146e-23
BLVRB	432.63	-1.50323	0.147199	-10.2122	1.74808e-24	1.84338e-23
TOMM20	11507.3	0.706119	0.0691509	10.2113	1.76532e-24	1.86035e-23
PLEKHA8	2714.26	0.765612	0.0750326	10.2037	1.90811e-24	2.00952e-23
CHORDC1	2060.15	0.964165	0.0945339	10.1991	2.0003e-24	2.10525e-23
LRFN4	736.337	-1.1476	0.112612	-10.1908	2.18047e-24	2.29338e-23
CLIP1	7296.32	-0.870286	0.0854317	-10.1869	2.26849e-24	2.38441e-23
EPB41L2	6471.68	0.734655	0.0721305	10.1851	2.31154e-24	2.42809e-23
TXNIP	81195.1	0.638244	0.0626934	10.1804	2.4258e-24	2.54646e-23
CBX5	17327.7	0.72487	0.0712325	10.1761	2.53494e-24	2.65931e-23
TAF10	1785.47	0.942927	0.0926827	10.1737	2.59816e-24	2.72388e-23
PRR16	1002.72	-1.05924	0.104138	-10.1715	2.65794e-24	2.78475e-23
RAB3IL1	135.427	-2.45221	0.241218	-10.166	2.81358e-24	2.94591e-23
LRRC16A	885.962	-1.0931	0.107542	-10.1645	2.85716e-24	2.98961e-23
KCTD13	1118.6	1.05274	0.103596	10.162	2.93077e-24	3.06466e-23
SBK1	2584.43	1.02412	0.100804	10.1595	3.00572e-24	3.141e-23
ELMOD3	516.719	-1.6245	0.159907	-10.1591	3.01952e-24	3.1534e-23
RNF213	4808.66	-0.723308	0.0711997	-10.1588	3.02626e-24	3.15841e-23
HSPA12A	6769.28	0.852915	0.0839586	10.1588	3.02912e-24	3.15935e-23
LAMA1	393.315	1.26929	0.124949	10.1585	3.03775e-24	3.16633e-23
NASP	4589.15	0.8144	0.0802045	10.154	3.17892e-24	3.31134e-23
CCDC24	185.387	-1.92759	0.189856	-10.1529	3.21802e-24	3.34992e-23
CHRD	119.879	-2.52934	0.249215	-10.1492	3.3394e-24	3.47404e-23
FMNL1	94.9841	-2.81575	0.277522	-10.146	3.45161e-24	3.58849e-23
NUAK2	597.08	1.19703	0.117998	10.1445	3.50703e-24	3.64377e-23
PARP12	138.675	-2.4265	0.239364	-10.1373	3.77499e-24	3.91966e-23
ZNF219	336.872	-1.42882	0.141015	-10.1324	3.96884e-24	4.1183e-23
C8orf46	74.8979	-5.29164	0.522255	-10.1323	3.9719e-24	4.11885e-23
ARHGEF19	141.632	-2.4708	0.243978	-10.1272	4.18664e-24	4.33876e-23
SAMD10	190.518	-1.82839	0.180596	-10.1242	4.31511e-24	4.46904e-23
GREB1L	799.474	1.07163	0.105865	10.1226	4.38445e-24	4.53796e-23
NLRC5	327.257	-1.6335	0.161416	-10.1198	4.51388e-24	4.66894e-23
TLE2	129.85	-2.34	0.231261	-10.1184	4.57624e-24	4.73043e-23
PARP1	6788.07	0.71429	0.0706096	10.116	4.68995e-24	4.84489e-23
PIK3R1	5288.11	0.730316	0.0721958	10.1158	4.70285e-24	4.85513e-23
PGAP1	4800.03	1.02609	0.101507	10.1086	5.05897e-24	5.21946e-23
CCDC85B	1023.87	1.23403	0.122115	10.1055	5.22423e-24	5.38654e-23
KLHL5	4399.61	-0.89222	0.0883041	-10.104	5.30579e-24	5.46715e-23
RCC1	2011.05	0.81783	0.0809431	10.1038	5.31621e-24	5.47441e-23
RHOD	325.468	-2.18971	0.21674	-10.103	5.36025e-24	5.51626e-23
ITGA3	23369.3	1.02836	0.101794	10.1024	5.3924e-24	5.54583e-23
CX3CL1	628.053	1.3665	0.135288	10.1007	5.48595e-24	5.63848e-23
USP11	6346.38	0.861201	0.0852656	10.1002	5.51178e-24	5.66144e-23
CHMP1B	4908.9	0.736147	0.072892	10.0992	5.5723e-24	5.71998e-23
WASF2	9919.58	-0.839157	0.083124	-10.0952	5.79881e-24	5.94873e-23
ADAMTS7	1656.55	1.02881	0.101915	10.0948	5.82422e-24	5.97102e-23
CDH20	109.417	-3.06561	0.303732	-10.0932	5.92295e-24	6.06841e-23
KAT2A	694.606	-1.1911	0.118027	-10.0918	6.00821e-24	6.15188e-23
ENTPD5	2024.93	0.860046	0.0852275	10.0912	6.04434e-24	6.18497e-23
CAPN5	4155.34	0.8335	0.0826105	10.0895	6.14727e-24	6.28633e-23
IL21R	68.5708	-4.88078	0.483836	-10.0877	6.26256e-24	6.4002e-23
CTSH	545.334	-1.16371	0.115385	-10.0855	6.40564e-24	6.5423e-23
SSBP3	2998.31	0.863715	0.0856871	10.0799	6.78131e-24	6.92163e-23
PIK3R2	5985.22	0.779291	0.0773157	10.0793	6.8183e-24	6.95501e-23
OSMR	14733.2	0.788359	0.0782289	10.0776	6.94108e-24	7.0758e-23
ALOX5AP	70.8348	-4.59048	0.455768	-10.072	7.34965e-24	7.4876e-23
AKR7A2	1868.65	0.84841	0.0842534	10.0697	7.518e-24	7.6543e-23
NARS	9835.45	-0.677589	0.0673154	-10.0659	7.81793e-24	7.95468e-23
LDLRAD3	1494.44	0.836384	0.0830968	10.0652	7.8744e-24	8.00712e-23
C15orf59	176.286	-1.95594	0.194392	-10.0618	8.14939e-24	8.2765e-23
RCN1	9348.02	-0.8428	0.0837624	-10.0618	8.14951e-24	8.2765e-23
CCNI	24700.7	0.669172	0.0665121	10.0609	8.22409e-24	8.34701e-23
CCDC8	1383.44	-0.970375	0.0964697	-10.0589	8.39642e-24	8.5166e-23
PAPSS2	772.756	-1.18853	0.118245	-10.0514	9.055e-24	9.17886e-23
ABI3BP	235.294	-2.3104	0.229915	-10.0489	9.28617e-24	9.40732e-23
GPD1L	1569.68	0.825533	0.0821565	10.0483	9.34692e-24	9.46296e-23
PBX2	2897.07	-0.892077	0.0888003	-10.0459	9.5793e-24	9.69218e-23
EPHX1	4205.78	0.901971	0.0898	10.0442	9.74083e-24	9.84947e-23
KIAA0319L	7524.97	0.858775	0.0855021	10.0439	9.77207e-24	9.8749e-23
HHAT	1587.95	-0.849724	0.0846362	-10.0397	1.01962e-23	1.0297e-22
GMNN	439.026	1.27728	0.127226	10.0394	1.0227e-23	1.03218e-22
COL8A2	2451.85	-3.55906	0.35479	-10.0314	1.10887e-23	1.11845e-22
SLC22A5	274.046	-1.59075	0.158599	-10.03	1.12464e-23	1.13365e-22
NPL	156.601	-2.30306	0.229665	-10.0279	1.1493e-23	1.15779e-22
ENY2	3203.79	0.790918	0.078898	10.0246	1.18883e-23	1.19687e-22
PAQR3	3389.01	1.15381	0.115144	10.0206	1.2377e-23	1.2453e-22
TGFB2	16561.6	-1.08488	0.108334	-10.0142	1.31977e-23	1.32705e-22
DUSP14	2156.98	0.879065	0.0877828	10.0141	1.32181e-23	1.32828e-22
SLC16A2	4225.21	0.924922	0.0924375	10.0059	1.43547e-23	1.4416e-22
TPPP	1199.6	1.12905	0.112863	10.0037	1.46769e-23	1.47304e-22
SDCBP	8964.86	0.689661	0.0689517	10.0021	1.49214e-23	1.49665e-22
UNC13B	6179.55	0.825774	0.0825677	10.0012	1.50585e-23	1.50948e-22
RYK	4561.05	0.744361	0.0744428	9.9991	1.53787e-23	1.54062e-22
AASDH	1140.56	0.864158	0.0864417	9.99701	1.5707e-23	1.57254e-22
TMEM63C	467.901	-1.31942	0.132025	-9.99375	1.6233e-23	1.6242e-22
NEK11	123.528	-2.42727	0.242921	-9.99199	1.65226e-23	1.65216e-22
B4GALT3	1862.42	0.853246	0.0854989	9.97962	1.87181e-23	1.87054e-22
MDK	6822.54	-0.904558	0.0906427	-9.97938	1.87645e-23	1.87402e-22
CHAMP1	2194.11	0.783879	0.0785908	9.97419	1.97715e-23	1.97338e-22
ACSF2	381.516	-1.4927	0.149673	-9.97307	1.99948e-23	1.99444e-22
RCCD1	373.506	-1.37683	0.13806	-9.97268	2.0073e-23	2.00102e-22
IFI16	3595.8	-0.853423	0.0855943	-9.97056	2.05079e-23	2.04311e-22
CCHCR1	323.549	-1.39793	0.140273	-9.96576	2.15218e-23	2.1428e-22
ATP1A2	66.6188	-4.3479	0.436386	-9.96344	2.20303e-23	2.19208e-22
NLRX1	608.166	-1.15302	0.115764	-9.96005	2.27947e-23	2.26676e-22
MLLT6	3703.49	-0.764838	0.0767936	-9.95965	2.28868e-23	2.27453e-22
ZC2HC1A	2300.89	1.09665	0.110121	9.95861	2.3127e-23	2.29699e-22
CASP7	823.85	-0.992594	0.0996772	-9.95808	2.32504e-23	2.30783e-22
KIF13A	4426.55	-0.706997	0.0710028	-9.95731	2.34322e-23	2.32446e-22
FOXRED2	1172.97	1.0039	0.100822	9.9571	2.34817e-23	2.32794e-22
SP110	305.896	-1.72051	0.172795	-9.95693	2.35207e-23	2.33039e-22
LUC7L	2780.58	0.802895	0.0806591	9.95419	2.41795e-23	2.3942e-22
FBN3	75.5401	-4.3071	0.432838	-9.95084	2.50058e-23	2.47451e-22
SPATS2L	4989.87	-0.68372	0.0687273	-9.9483	2.56527e-23	2.53698e-22
CTPS1	2006	0.76562	0.0769642	9.94774	2.5798e-23	2.54979e-22
MORC3	2631.78	0.905354	0.0910404	9.94452	2.66448e-23	2.63188e-22
MTFMT	574.083	1.05923	0.106517	9.94423	2.67239e-23	2.63809e-22
CREB5	2252.6	0.884152	0.0889159	9.94369	2.68696e-23	2.65086e-22
PPP2CA	6865.33	0.730569	0.0734857	9.94166	2.74222e-23	2.70374e-22
TP53INP1	8979.15	0.8914	0.0897197	9.9354	2.92013e-23	2.8774e-22
TMEM254	892.899	-1.13545	0.114317	-9.9325	3.00629e-23	2.96051e-22
IFI27L2	577.612	-1.31153	0.132054	-9.93179	3.02779e-23	2.97987e-22
CACNA1A	454.908	-1.47518	0.148617	-9.92608	3.20627e-23	3.15361e-22
TMEM201	1637.64	1.08404	0.109229	9.92446	3.25847e-23	3.20301e-22
CREG1	3846.01	0.724653	0.0730416	9.9211	3.37008e-23	3.31072e-22
MPPE1	802.334	-1.03974	0.104884	-9.91327	3.64517e-23	3.57879e-22
GPN3	612.439	1.04327	0.105258	9.91153	3.70926e-23	3.63951e-22
VDAC3	4243.46	0.72483	0.0731599	9.90748	3.86265e-23	3.78774e-22
EVI5	3188.27	0.889545	0.0897878	9.90719	3.87395e-23	3.79652e-22
CDCA4	608.908	1.06293	0.107297	9.90643	3.90352e-23	3.82318e-22
LTBP3	5185.3	-0.779488	0.0787402	-9.89949	4.184e-23	4.09543e-22
CERK	4955.24	0.823354	0.0832032	9.89569	4.34596e-23	4.25139e-22
RAP2B	2228.36	0.810303	0.0819007	9.89372	4.43247e-23	4.33341e-22
FZD5	2282.67	0.968978	0.0979616	9.8914	4.53627e-23	4.43222e-22
HGSNAT	7142.26	0.835625	0.0844824	9.8911	4.54984e-23	4.4428e-22
TMEM245	7756.55	0.819103	0.0828169	9.89054	4.57567e-23	4.46533e-22
SEMA4F	2729.98	0.944046	0.0954533	9.89013	4.59442e-23	4.48094e-22
DUSP3	5025.29	-0.696392	0.0704189	-9.88927	4.63381e-23	4.51664e-22
AK3	5208.44	0.890637	0.0900789	9.8873	4.72624e-23	4.60397e-22
RECK	1884.94	0.852778	0.0862932	9.88234	4.96616e-23	4.83478e-22
NGEF	155.208	-2.41506	0.244528	-9.8764	5.2692e-23	5.12673e-22
GPSM2	345.291	1.34968	0.136667	9.87563	5.31003e-23	5.16336e-22
C17orf51	2035.53	0.817076	0.0827448	9.87465	5.36201e-23	5.21078e-22
ADAMTS12	669.472	-1.09774	0.111182	-9.87341	5.42889e-23	5.27261e-22
ATP6V0D1	5058.8	0.810198	0.0821064	9.86766	5.74921e-23	5.58038e-22
MICALCL	90.9423	-2.90393	0.294427	-9.86298	6.02324e-23	5.84286e-22
TTC27	748.941	-1.12185	0.113763	-9.86123	6.12916e-23	5.94206e-22
RHOBTB3	9547.82	0.782071	0.0793183	9.85991	6.21037e-23	6.0172e-22
CLCN5	2016.12	0.77505	0.078703	9.84778	7.00762e-23	6.7856e-22
TTYH3	12668.7	1.06309	0.107999	9.84347	7.31441e-23	7.07845e-22
NIPA1	2488.99	0.739569	0.075138	9.84281	7.36283e-23	7.12106e-22
TTBK1	922.849	1.18382	0.120347	9.83673	7.82115e-23	7.55983e-22
FAM98C	207.384	-1.75433	0.178391	-9.8342	8.02032e-23	7.74772e-22
IL16	85.0118	-6.25537	0.636152	-9.83313	8.10619e-23	7.82602e-22
TAGLN2	12954.4	0.934331	0.0950306	9.83189	8.2061e-23	7.91776e-22
ARHGAP17	3345.49	0.798148	0.0811911	9.83049	8.32154e-23	8.02438e-22
GLTSCR1L	1409.75	-0.793759	0.0807616	-9.82842	8.49393e-23	8.18575e-22
GALNT11	3481.22	0.740157	0.0753629	9.82124	9.12166e-23	8.78549e-22
SLMO1	193.026	-1.74744	0.17793	-9.82091	9.15128e-23	8.80879e-22
HYDIN	169.476	-1.89222	0.192744	-9.81729	9.48567e-23	9.12525e-22
RANBP6	3125.42	0.741928	0.0756001	9.81384	9.81572e-23	9.43717e-22
MLF1IP	261.811	1.65281	0.168447	9.81205	9.99159e-23	9.60056e-22
ZNF474	72.3314	-3.80067	0.388169	-9.79128	1.22729e-22	1.17856e-21
SPIN1	8399.83	0.668869	0.0683373	9.78775	1.27095e-22	1.21977e-21
FKBP1A	14077.8	0.612389	0.0625811	9.78553	1.29917e-22	1.24611e-21
PLA2G15	2264.07	0.967924	0.098941	9.78284	1.33412e-22	1.27888e-21
RFTN1	1707.54	-0.888224	0.0908229	-9.77974	1.37567e-22	1.31793e-21
SCD	32709.1	-0.678397	0.0693715	-9.77919	1.38313e-22	1.3243e-21
ATL3	4715.98	-1.01049	0.103349	-9.77742	1.40754e-22	1.34687e-21
TRIM21	391.312	-1.2682	0.12973	-9.77568	1.43196e-22	1.36943e-21
RNGTT	2381.48	0.813052	0.0831983	9.77246	1.47819e-22	1.41281e-21
MOV10L1	64.047	-4.80943	0.492361	-9.7681	1.54321e-22	1.47408e-21
ID4	2158.05	1.07987	0.110586	9.76496	1.59168e-22	1.51949e-21
TNFAIP1	6786.12	0.750073	0.0768423	9.7612	1.6519e-22	1.57605e-21
KCNMA1	5120.36	-0.791709	0.0811114	-9.76076	1.659e-22	1.5819e-21
CAPN2	11811.5	-0.61667	0.0632067	-9.75639	1.73207e-22	1.6506e-21
SLC39A7	10336.7	-0.688073	0.0705332	-9.7553	1.7508e-22	1.66748e-21
STPG1	235.017	-1.63187	0.167283	-9.75513	1.75377e-22	1.66932e-21
PFKP	11349.9	-0.819304	0.0840092	-9.75255	1.79884e-22	1.71122e-21
SDK1	2412.58	0.940424	0.096465	9.74886	1.86553e-22	1.77362e-21
MRPS15	968.453	-1.07621	0.110425	-9.74609	1.91717e-22	1.82165e-21
EDN2	69.4217	-5.53352	0.56783	-9.74503	1.93728e-22	1.83968e-21
C14orf132	5752.28	-0.763436	0.0783612	-9.74253	1.98545e-22	1.88432e-21
CIZ1	2598.22	-0.728875	0.0748669	-9.73561	2.12542e-22	2.01598e-21
RALY	5138.63	0.776783	0.0798007	9.73404	2.15849e-22	2.04616e-21
PSPH	1449.85	-1.26097	0.129559	-9.73276	2.18585e-22	2.07088e-21
DXO	389.894	-1.4134	0.145224	-9.73254	2.19047e-22	2.07405e-21
CDC42BPA	7226.54	-0.726171	0.0746678	-9.72535	2.35085e-22	2.22461e-21
CUEDC2	1443	-0.782181	0.080441	-9.72367	2.39011e-22	2.26043e-21
API5	7436.27	0.700843	0.0720983	9.72066	2.46192e-22	2.327e-21
SUCO	8058.5	0.849117	0.0873796	9.71756	2.53783e-22	2.39735e-21
ETNK1	4956.37	1.1571	0.119207	9.70667	2.82403e-22	2.66615e-21
NANOS1	411.611	1.41005	0.145365	9.70006	3.01327e-22	2.84316e-21
SENP1	997.741	-1.03449	0.106688	-9.69646	3.12156e-22	2.94363e-21
ORAI1	535.038	1.29248	0.133323	9.69434	3.18701e-22	3.0036e-21
CAMK2D	9043.81	0.828143	0.0854868	9.68738	3.41174e-22	3.21353e-21
NLRP1	68.6257	-4.06302	0.419522	-9.68488	3.49602e-22	3.29101e-21
GINS4	348.331	1.32585	0.136912	9.68396	3.52766e-22	3.31886e-21
MAGT1	9958.56	0.853858	0.0881995	9.68099	3.63189e-22	3.41495e-21
AP5B1	304.794	-1.39906	0.144539	-9.67945	3.68695e-22	3.46471e-21
DLX1	1110.94	1.06718	0.110334	9.67221	3.95723e-22	3.71655e-21
PTPRN	2132.51	-0.989179	0.102273	-9.67195	3.96761e-22	3.72413e-21
NUBP1	733.635	1.02855	0.106348	9.6716	3.98098e-22	3.73453e-21
DBN1	24823.9	0.968529	0.100143	9.67142	3.98809e-22	3.73904e-21
BCAM	1380.28	-0.990383	0.102413	-9.67047	4.02541e-22	3.77185e-21
OSBPL10	5173.87	-0.639577	0.0661691	-9.66579	4.21336e-22	3.94568e-21
ANKH	889.202	-0.899873	0.0931043	-9.66522	4.23723e-22	3.96574e-21
KDM1A	7466.05	0.622127	0.0643723	9.66451	4.26639e-22	3.99074e-21
ZC3H10	616.53	1.08905	0.112705	9.66288	4.33505e-22	4.05263e-21
MAP1B	189965	0.791865	0.0819563	9.66204	4.37057e-22	4.08348e-21
COL5A3	2552.93	-2.44777	0.25342	-9.65894	4.50486e-22	4.20653e-21
CAB39	3830.74	0.735493	0.0761693	9.65603	4.63462e-22	4.3252e-21
RCN3	968.653	-1.33089	0.137904	-9.65087	4.87409e-22	4.54607e-21
PCED1A	467.341	-1.15143	0.119352	-9.64735	5.04422e-22	4.70204e-21
NRBP1	8334.16	0.733607	0.0760456	9.64694	5.06423e-22	4.71799e-21
JUND	5957.5	1.07279	0.111235	9.64433	5.19474e-22	4.8368e-21
MTM1	755.023	0.998153	0.103566	9.63781	5.53564e-22	5.15126e-21
CAMKV	274.461	-1.63934	0.170243	-9.62942	6.00659e-22	5.5863e-21
MAPK8IP1	3220.77	1.00566	0.10448	9.62537	6.24812e-22	5.8076e-21
TLCD2	153.94	-1.98722	0.20651	-9.6229	6.40012e-22	5.94548e-21
AHCTF1	3449.03	0.788451	0.0819908	9.61633	6.82196e-22	6.33011e-21
TTC19	2894.92	0.694475	0.0722182	9.61635	6.821e-22	6.33011e-21
SPOCK1	41461	0.741045	0.0770739	9.61474	6.92855e-22	6.42534e-21
TNFSF12	77.5693	-3.06865	0.31917	-9.61445	6.94811e-22	6.43612e-21
APH1B	527.351	-1.18149	0.122886	-9.6145	6.9444e-22	6.43612e-21
TUBB4B	6045.09	0.97809	0.101743	9.61332	7.02441e-22	6.50309e-21
MRPL15	1272.55	-0.797822	0.0829927	-9.61316	7.03544e-22	6.50958e-21
TSHZ1	1472.31	0.825951	0.085923	9.61269	7.068e-22	6.53599e-21
ACTL6A	2731.48	0.66582	0.069277	9.61099	7.1858e-22	6.64113e-21
THBS1	141058	-0.970682	0.101104	-9.60081	7.93207e-22	7.32667e-21
PXDN	23296.8	-0.696318	0.0725318	-9.60019	7.9801e-22	7.36684e-21
ZNF391	285.612	-1.53146	0.159576	-9.59709	8.22311e-22	7.58255e-21
MTFR1	1729.42	0.84165	0.087698	9.59714	8.21932e-22	7.58255e-21
CYTH1	1614.78	0.749822	0.0781351	9.59649	8.27156e-22	7.62289e-21
ZNFX1	4523.89	-0.834956	0.0870391	-9.59288	8.5659e-22	7.88967e-21
UBXN2A	2399.24	0.795527	0.0829612	9.58914	8.88216e-22	8.17632e-21
ZNF765	822.117	1.06848	0.11147	9.58531	9.2182e-22	8.48085e-21
PAPPA2	363.915	-4.83454	0.504397	-9.5848	9.2637e-22	8.51788e-21
INSR	1392.09	-0.873561	0.0911748	-9.58117	9.59474e-22	8.81728e-21
SOCS3	4044.49	1.00112	0.104511	9.57914	9.7857e-22	8.98767e-21
HDAC3	2936.49	0.780609	0.0815135	9.57644	1.00451e-21	9.22068e-21
CLIP4	4453.16	-0.843911	0.088185	-9.56978	1.07133e-21	9.82847e-21
CASKIN2	723.735	-1.03908	0.108582	-9.56947	1.07452e-21	9.85219e-21
ARL15	1457.61	0.91297	0.0954113	9.56879	1.08168e-21	9.91229e-21
PNRC1	4548.29	0.699009	0.0730763	9.56547	1.11697e-21	1.02298e-20
SMC5	3681.42	0.922308	0.0964282	9.56472	1.12505e-21	1.02981e-20
IRF2	611.067	-1.05607	0.110422	-9.56397	1.1333e-21	1.03677e-20
PAPSS1	6142.06	0.638974	0.0668547	9.55766	1.20447e-21	1.10126e-20
SLC2A10	831.41	-1.59411	0.166916	-9.55034	1.29272e-21	1.18128e-20
BCAP31	5918.6	0.798957	0.0836584	9.55023	1.29403e-21	1.18181e-20
DDX3X	13825.9	0.601684	0.0630034	9.55003	1.29659e-21	1.18349e-20
KRT81	65.3432	-5.26684	0.55166	-9.54726	1.33171e-21	1.21486e-20
ITGB4	3317.69	-0.776819	0.081426	-9.54018	1.42582e-21	1.29998e-20
GRIN2D	117.189	-2.52826	0.265058	-9.53853	1.44865e-21	1.32005e-20
B3GAT3	2598.79	1.10648	0.116028	9.53631	1.48011e-21	1.34797e-20
LRP10	10719.1	-0.882431	0.0925578	-9.53383	1.51583e-21	1.37972e-20
SYAP1	4107.92	0.822931	0.0863288	9.53252	1.53506e-21	1.39644e-20
PTPRZ1	799.315	-1.02555	0.107612	-9.53005	1.5721e-21	1.42933e-20
DNAJC12	285.581	-1.49885	0.1573	-9.52861	1.59409e-21	1.44852e-20
COG7	589.789	-1.12202	0.117754	-9.5285	1.59571e-21	1.44918e-20
GPC5	51.963	4.29094	0.450617	9.52236	1.69295e-21	1.53663e-20
MORC4	2201.8	-0.80495	0.0845743	-9.51767	1.77114e-21	1.6067e-20
TAF4	1152.15	0.942987	0.0991875	9.50712	1.96022e-21	1.77723e-20
ERI1	1639.68	0.815557	0.0858043	9.50485	2.00337e-21	1.81534e-20
KIAA0513	2790.61	0.867737	0.0913572	9.49828	2.13378e-21	1.93243e-20
ZNF22	1205.63	0.905679	0.0953663	9.49684	2.16346e-21	1.95822e-20
PDIA4	18127	0.740173	0.0779798	9.49185	2.26964e-21	2.05318e-20
TSC22D2	5935.77	0.814599	0.0858388	9.48986	2.31335e-21	2.09156e-20
PCBD1	707.995	-1.0386	0.109478	-9.48685	2.38127e-21	2.15176e-20
ANKRD6	1234.29	-0.819811	0.0864245	-9.48586	2.404e-21	2.17109e-20
SLC15A3	64.6673	-5.21861	0.550226	-9.48448	2.43598e-21	2.19875e-20
TDRD3	666.812	-1.19741	0.126291	-9.4814	2.50902e-21	2.26342e-20
PEX11A	247.484	-1.51116	0.15948	-9.47554	2.6538e-21	2.3927e-20
AHR	6265.91	-0.910401	0.0961024	-9.47324	2.71288e-21	2.4446e-20
ME2	2302.15	0.686281	0.0724532	9.47206	2.74372e-21	2.47102e-20
ORC6	275.364	1.59452	0.168445	9.46609	2.90501e-21	2.61483e-20
PRDM5	305.249	-1.86998	0.197558	-9.46548	2.92216e-21	2.62881e-20
TESK2	147.123	1.95119	0.206235	9.46104	3.04894e-21	2.74134e-20
ROS1	64.7142	-3.67165	0.388103	-9.46051	3.06436e-21	2.75368e-20
PGM2L1	8878.27	0.680379	0.0719906	9.45094	3.35796e-21	3.01459e-20
SIRT1	1890.63	0.941	0.099567	9.45093	3.35842e-21	3.01459e-20
TUSC3	6968.06	0.628878	0.066552	9.44943	3.40681e-21	3.05633e-20
KRBA1	408.781	-1.29341	0.136881	-9.44917	3.41526e-21	3.06222e-20
ZKSCAN2	1612.28	0.83596	0.0884959	9.44632	3.50964e-21	3.14511e-20
RAP1GAP	152.243	-2.01014	0.21281	-9.44567	3.53133e-21	3.1628e-20
PTPN1	9358.17	0.717898	0.0760509	9.43971	3.73802e-21	3.34608e-20
STX7	4918.93	0.835089	0.0885016	9.43586	3.87806e-21	3.46951e-20
PLA2G12A	4598.71	0.729034	0.0773038	9.43076	4.07131e-21	3.6404e-20
ZBTB2	554.999	-1.07518	0.114168	-9.41756	4.61693e-21	4.126e-20
TSKU	3800.14	-0.783255	0.0831877	-9.41552	4.70751e-21	4.20463e-20
TMEM8A	2171.06	0.787219	0.0836136	9.41497	4.73232e-21	4.22447e-20
CITED2	6453.34	0.657765	0.0698651	9.41479	4.74048e-21	4.22943e-20
SGSM3	1980.02	0.763991	0.0811569	9.41375	4.78752e-21	4.26905e-20
SSH2	2994.33	0.724596	0.0769921	9.41131	4.89997e-21	4.36692e-20
IER3	4416.7	0.686422	0.0729413	9.4106	4.93296e-21	4.39391e-20
TBC1D24	1335.65	0.815862	0.0867182	9.40819	5.04736e-21	4.49334e-20
NICN1	722.686	-1.06637	0.113381	-9.4052	5.19312e-21	4.62056e-20
PSME4	5250.12	0.59245	0.0630526	9.39612	5.66124e-21	5.03432e-20
RBCK1	3117.76	-0.81827	0.0871017	-9.39442	5.75356e-21	5.11361e-20
TMED4	4202.86	0.618895	0.0658863	9.39338	5.81046e-21	5.16135e-20
RNF175	59.4382	-4.05931	0.432169	-9.39288	5.83812e-21	5.18309e-20
VPS26A	5643.43	0.838521	0.0893538	9.38427	6.33514e-21	5.62127e-20
PITHD1	2885.48	0.709614	0.0756524	9.37993	6.6016e-21	5.8545e-20
CYP46A1	402.567	1.35042	0.14405	9.37465	6.9403e-21	6.15151e-20
FAM214B	2933.02	-0.783317	0.0835911	-9.37082	7.19728e-21	6.3758e-20
TMEM87A	4527.95	0.700361	0.074782	9.36538	7.57768e-21	6.70912e-20
ZFP36	877.139	0.95439	0.101933	9.36296	7.75344e-21	6.86099e-20
ERMP1	1914.04	0.907452	0.096927	9.36222	7.80804e-21	6.90554e-20
KREMEN1	946.77	-0.907235	0.0969389	-9.35883	8.06263e-21	7.12682e-20
MXI1	1713.06	-0.773894	0.0827003	-9.3578	8.14106e-21	7.19223e-20
PLCB3	1383.13	-0.757145	0.0809723	-9.35067	8.70943e-21	7.69017e-20
ZNF785	629.292	-1.08057	0.115589	-9.34834	8.9031e-21	7.8569e-20
PREX1	215.487	1.70092	0.182007	9.34533	9.16066e-21	8.0798e-20
AP2A2	4081.52	-0.747693	0.0800698	-9.33802	9.81547e-21	8.65265e-20
PLEKHF1	190.864	-2.17565	0.233137	-9.33207	1.03826e-20	9.14759e-20
TOLLIP	3411.4	0.724338	0.0776482	9.32845	1.07428e-20	9.4598e-20
LARP1B	1517.49	0.852148	0.0913862	9.32469	1.11311e-20	9.79643e-20
SOAT1	2726.3	0.844128	0.0905667	9.32051	1.1578e-20	1.01842e-19
TOR1B	2487.71	0.764733	0.0820778	9.31718	1.19478e-20	1.05038e-19
SASS6	179.907	-1.81076	0.194374	-9.31585	1.20978e-20	1.06299e-19
SAMD4A	6056.84	0.761016	0.0816952	9.3153	1.21606e-20	1.06793e-19
ATP1A1	11658.9	-0.688686	0.073936	-9.31462	1.22389e-20	1.07423e-19
ZNF860	183.404	-1.78881	0.192096	-9.31208	1.25352e-20	1.09965e-19
ELAVL2	2100.22	0.881087	0.0946448	9.30941	1.28548e-20	1.12707e-19
RASSF3	2144.53	-1.17045	0.125823	-9.3023	1.37445e-20	1.20442e-19
FAM105B	1934.75	0.693988	0.0746058	9.30207	1.37734e-20	1.2063e-19
SYT3	118.534	-2.25802	0.242856	-9.29779	1.43396e-20	1.25522e-19
AGPAT6	6351.3	0.761563	0.0819411	9.29403	1.48557e-20	1.2997e-19
ZNF689	353.503	-1.26373	0.135984	-9.29324	1.49665e-20	1.30868e-19
SH3D21	1308.12	-0.833545	0.0897131	-9.29124	1.52506e-20	1.3328e-19
GCDH	703.682	1.02084	0.109903	9.28853	1.56436e-20	1.36642e-19
PIR	262.525	-1.42542	0.153469	-9.288	1.57207e-20	1.37241e-19
ZP4	84.6865	-2.68929	0.289571	-9.28714	1.58488e-20	1.38285e-19
LNPEP	7793.9	0.819088	0.0882053	9.28615	1.59972e-20	1.39505e-19
CTSO	1143.18	-1.16582	0.125628	-9.27994	1.69578e-20	1.47803e-19
TAP1	1387.89	-0.842172	0.0907903	-9.27601	1.7595e-20	1.53264e-19
C11orf63	126.215	-2.06201	0.222296	-9.27596	1.76033e-20	1.53264e-19
DBNDD1	1267.86	-0.925813	0.0998226	-9.27458	1.78313e-20	1.55166e-19
ZNF253	1041.44	0.962219	0.103754	9.27403	1.79237e-20	1.55886e-19
SECISBP2L	6570.81	0.681527	0.0735111	9.27107	1.84285e-20	1.60191e-19
ZNF783	743.056	-0.905114	0.0976412	-9.26979	1.86512e-20	1.62039e-19
SH3GLB2	1862.23	0.748587	0.0808103	9.26351	1.97823e-20	1.71775e-19
ATP13A3	7693.67	0.802573	0.086641	9.2632	1.98397e-20	1.72181e-19
KIF3A	4849.01	0.937882	0.101264	9.26172	2.01165e-20	1.7449e-19
MGAT4A	700.563	1.12788	0.121804	9.25983	2.04767e-20	1.77519e-19
ALK	848.178	0.95199	0.102828	9.25805	2.08202e-20	1.80401e-19
MANBA	3795.9	0.661365	0.0714429	9.25726	2.09752e-20	1.81647e-19
GNPTAB	6993.48	0.72511	0.0783387	9.2561	2.1204e-20	1.83531e-19
LYRM2	3201.93	0.657811	0.0710754	9.25512	2.13999e-20	1.85128e-19
TRIM46	525.555	-1.16678	0.126148	-9.24926	2.26044e-20	1.95443e-19
SH3PXD2B	10364	0.756824	0.0818525	9.2462	2.32622e-20	2.01023e-19
EPYC	86.7056	-2.93303	0.317342	-9.24251	2.40791e-20	2.07972e-19
MAP2	15363.2	0.665948	0.0720563	9.24206	2.41805e-20	2.08737e-19
JAKMIP3	76.9117	-2.83456	0.306924	-9.23539	2.57343e-20	2.22032e-19
HPRT1	1678.63	0.756684	0.0819393	9.23469	2.59037e-20	2.23375e-19
UBE2I	6065.39	0.652572	0.0706808	9.23267	2.6398e-20	2.27516e-19
TOR1AIP2	3348.96	0.771851	0.0836248	9.22992	2.7083e-20	2.33296e-19
PGD	11647.9	0.674783	0.0731222	9.22815	2.75353e-20	2.37066e-19
DOPEY1	2657.39	0.685645	0.0743234	9.22516	2.83142e-20	2.43643e-19
PLOD2	82154	0.958048	0.103861	9.22437	2.85224e-20	2.45175e-19
EIF4A1	30022.6	0.574323	0.0622614	9.22439	2.85184e-20	2.45175e-19
INO80	1502.83	-0.807925	0.0875906	-9.22387	2.86554e-20	2.46188e-19
ZNRF2	438.74	1.32723	0.143902	9.22313	2.88552e-20	2.47773e-19
HDHD2	1859.49	0.749355	0.0813096	9.21608	3.08172e-20	2.6448e-19
APOBEC3F	86.8962	-2.63681	0.286167	-9.21425	3.13454e-20	2.68871e-19
SPATA17	82.8715	-2.80843	0.304828	-9.21317	3.16647e-20	2.71467e-19
ZBED4	2833.24	0.699814	0.0759591	9.21304	3.17027e-20	2.71649e-19
MPP6	1202.52	0.921155	0.0999973	9.2118	3.20703e-20	2.74654e-19
KIAA1919	914.455	1.00114	0.108685	9.21135	3.22055e-20	2.75666e-19
B3GALNT2	982.766	0.844541	0.0917159	9.20822	3.31579e-20	2.83669e-19
RGS2	572.748	1.16581	0.126668	9.2037	3.45838e-20	2.95712e-19
C19orf12	1153.84	-0.842121	0.0915252	-9.20097	3.54724e-20	3.0315e-19
UCHL1	28175.6	-0.733077	0.0797412	-9.1932	3.81342e-20	3.25727e-19
ADAMTS14	346.286	-1.65782	0.180379	-9.19079	3.89964e-20	3.32916e-19
CXCR4	260.866	1.45147	0.157955	9.18915	3.95962e-20	3.37859e-19
C6orf106	5294.06	0.624212	0.0679314	9.18887	3.97007e-20	3.38572e-19
NONO	20483.5	0.6738	0.0733332	9.18821	3.99447e-20	3.40474e-19
PIKFYVE	4493.78	0.684866	0.0745416	9.18771	4.01304e-20	3.41877e-19
EFCAB11	306.23	-1.29614	0.141114	-9.18511	4.11124e-20	3.50059e-19
DTNB	670.908	1.00326	0.109229	9.18491	4.11888e-20	3.50526e-19
RRP1B	3320.4	0.8208	0.0893654	9.18476	4.12436e-20	3.50809e-19
KLHDC8A	111.167	-2.35904	0.256921	-9.18194	4.23397e-20	3.59943e-19
APLP2	67063.4	0.760363	0.0828116	9.18184	4.23786e-20	3.60085e-19
MR1	104.113	-2.88848	0.314673	-9.17932	4.33836e-20	3.68432e-19
MVB12A	453.824	-1.20772	0.13166	-9.17303	4.59906e-20	3.90367e-19
SLC4A7	4593.81	0.841234	0.0917292	9.17084	4.69339e-20	3.98165e-19
NARS2	741.202	0.912267	0.0994902	9.16941	4.75627e-20	4.03289e-19
UCHL3	1342.15	0.772565	0.0843337	9.16082	5.15058e-20	4.36495e-19
EIF2S2	7849.8	-0.663809	0.072476	-9.15902	5.237e-20	4.43587e-19
DUSP4	4350.88	0.693953	0.0757678	9.15894	5.24108e-20	4.43701e-19
EGFLAM	245.111	-1.69837	0.185452	-9.15802	5.28606e-20	4.47276e-19
CISD2	1842.58	0.992135	0.108356	9.15623	5.37432e-20	4.54507e-19
MLLT4	7484.45	0.573655	0.062688	9.15096	5.64284e-20	4.76967e-19
CHAC2	189.216	1.77646	0.194143	9.15029	5.67787e-20	4.79678e-19
C1GALT1	2786.84	1.05567	0.115382	9.14936	5.72719e-20	4.83593e-19
STT3A	10216.6	-0.712519	0.0779095	-9.14547	5.93718e-20	5.01063e-19
IZUMO4	159.116	1.71061	0.187052	9.14512	5.95625e-20	5.02412e-19
LEPROTL1	3806.62	0.825604	0.0903037	9.14253	6.10084e-20	5.14341e-19
FAM8A1	2904.85	0.893561	0.097745	9.14176	6.14418e-20	5.17725e-19
KIF1B	17628.4	0.648205	0.0709155	9.14053	6.21477e-20	5.23402e-19
GFAP	3008.12	0.820479	0.0897684	9.13996	6.24777e-20	5.25908e-19
IKZF4	911.647	-0.868314	0.0950156	-9.13865	6.32391e-20	5.32041e-19
DRP2	170.482	-1.80768	0.197821	-9.13799	6.36248e-20	5.35009e-19
CKS2	362.877	1.62755	0.178116	9.13757	6.38687e-20	5.36782e-19
COL4A3BP	3459.26	0.763683	0.0836083	9.13406	6.59758e-20	5.54204e-19
ARL3	2363.93	0.717993	0.0786388	9.13026	6.83319e-20	5.73698e-19
MAMLD1	734.434	-1.05587	0.115673	-9.12802	6.97655e-20	5.85431e-19
CADM3	2216.48	0.901125	0.0987324	9.12695	7.04594e-20	5.90948e-19
SUB1	7609.26	0.887132	0.0972095	9.12597	7.10935e-20	5.95959e-19
FN3KRP	1923.14	0.823661	0.0902749	9.12392	7.2452e-20	6.07034e-19
MPND	535.476	1.08229	0.118647	9.1219	7.38153e-20	6.18137e-19
KIF20B	559.58	1.28989	0.141422	9.12087	7.45264e-20	6.2377e-19
ACTR3	15650.6	-0.78099	0.0857214	-9.1108	8.17748e-20	6.84084e-19
AGT	128.192	-2.03283	0.223465	-9.09686	9.29836e-20	7.77451e-19
FAM167A	116.906	-2.14688	0.236261	-9.0869	1.01903e-19	8.51587e-19
GCAT	514.197	1.04972	0.115522	9.08676	1.02034e-19	8.52244e-19
ZCCHC5	64.0747	-3.27891	0.360947	-9.08418	1.04481e-19	8.72232e-19
CHRM4	126.86	2.21097	0.243413	9.08318	1.05445e-19	8.79832e-19
OTUB2	215.371	-1.5934	0.175434	-9.08264	1.05971e-19	8.83763e-19
ZNF124	301.016	1.30624	0.143837	9.0814	1.07188e-19	8.93453e-19
SMC6	2439.13	0.791975	0.0872112	9.08111	1.07471e-19	8.95354e-19
ZBTB18	2989.79	0.815516	0.089837	9.07773	1.10858e-19	9.23098e-19
HIST1H2AE	54.0081	3.61098	0.397804	9.07728	1.11318e-19	9.2645e-19
FAM211B	201.214	-1.70547	0.187896	-9.07669	1.11924e-19	9.31015e-19
AFAP1L1	257.2	-1.39911	0.154151	-9.0762	1.12428e-19	9.34731e-19
RPL22L1	825.447	1.02838	0.113309	9.0759	1.12746e-19	9.36892e-19
GPR157	134.03	-2.03218	0.223939	-9.07468	1.14015e-19	9.46952e-19
DACT1	2406.53	-0.655663	0.0722529	-9.07456	1.14136e-19	9.47476e-19
PTPRT	650.102	-1.48408	0.163626	-9.06993	1.19097e-19	9.88149e-19
TSPAN33	170.672	1.82553	0.201302	9.06862	1.20537e-19	9.99591e-19
MYD88	586.412	-1.11694	0.123217	-9.06477	1.24868e-19	1.03498e-18
SULF2	25002.8	-0.798157	0.0880605	-9.06373	1.26063e-19	1.04435e-18
JAK1	14590.5	0.612937	0.0676457	9.06099	1.29271e-19	1.07037e-18
N6AMT1	1009.01	0.851776	0.0940474	9.05688	1.34231e-19	1.11088e-18
TTC7B	717.111	-0.928278	0.102507	-9.05579	1.35588e-19	1.12154e-18
SEZ6L2	6842.44	-0.825431	0.0911535	-9.05539	1.36079e-19	1.12502e-18
SLC2A3	7682.18	0.813134	0.089799	9.05505	1.3651e-19	1.12802e-18
AMFR	6592.87	0.732463	0.0808973	9.05423	1.37534e-19	1.1359e-18
VAMP5	734.556	-1.10468	0.122017	-9.05353	1.38414e-19	1.14259e-18
SMARCD2	2112.57	0.737255	0.0814362	9.05316	1.38889e-19	1.14593e-18
PUS7	1517.52	0.768636	0.0849101	9.05235	1.39926e-19	1.15389e-18
RAP2A	5221.61	0.867361	0.0958384	9.05024	1.4265e-19	1.17576e-18
TRIOBP	3893.9	-0.690635	0.076363	-9.04411	1.50892e-19	1.24306e-18
ETV5	4074.29	0.766355	0.0847432	9.04327	1.52054e-19	1.252e-18
PHF15	221.718	-1.78216	0.19721	-9.03685	1.61256e-19	1.32709e-18
CAPRIN1	24477.4	0.516305	0.0571454	9.03492	1.64116e-19	1.34995e-18
GLRX2	454.649	1.06558	0.117951	9.03409	1.65368e-19	1.35955e-18
C1orf51	447.121	-1.19453	0.132248	-9.03251	1.6778e-19	1.37868e-18
GPX3	626.466	1.24046	0.137356	9.03096	1.70166e-19	1.39758e-18
TECR	2570.43	0.873539	0.0967473	9.02907	1.7313e-19	1.42121e-18
MAP3K10	517.176	-1.09549	0.121335	-9.02872	1.73699e-19	1.42516e-18
NPY2R	105.698	2.61195	0.289352	9.0269	1.76609e-19	1.4483e-18
BAI1	93.9239	-2.85072	0.315891	-9.02439	1.80695e-19	1.48106e-18
PLEKHH1	581.182	1.166	0.129242	9.02183	1.84967e-19	1.51531e-18
CDC42EP3	19519.5	-0.62483	0.0693009	-9.01619	1.94736e-19	1.59454e-18
PDZRN3	400.45	-1.48843	0.165085	-9.01612	1.94863e-19	1.59477e-18
PARD6B	197.703	1.6002	0.177491	9.0157	1.95622e-19	1.60018e-18
VPS37A	3103.98	0.839962	0.0933383	8.99912	2.27534e-19	1.86028e-18
LPCAT1	5094.85	0.816175	0.0907142	8.99721	2.31528e-19	1.89198e-18
ARID5A	749.583	1.04371	0.116009	8.99677	2.32462e-19	1.89866e-18
ADAM17	7741.69	0.723976	0.0804959	8.99396	2.38489e-19	1.9469e-18
NUP188	3386.09	0.747636	0.0831281	8.99378	2.38863e-19	1.94897e-18
C1orf216	1400.8	-0.820745	0.0912633	-8.99315	2.40235e-19	1.95887e-18
2022-09-09	9258.06	-0.763169	0.0848614	-8.99312	2.40318e-19	1.95887e-18
PSKH1	3020.85	0.803616	0.0893785	8.99116	2.44645e-19	1.99314e-18
MYBL1	784.159	-1.26405	0.140613	-8.98961	2.4811e-19	2.02036e-18
SZRD1	12510.2	0.736708	0.0819551	8.98917	2.49115e-19	2.02753e-18
PLCD4	266.256	-1.50133	0.167151	-8.98187	2.66201e-19	2.1655e-18
CYP27C1	94.6889	-2.82876	0.315117	-8.97687	2.78582e-19	2.26508e-18
INPP5F	9091.99	0.690941	0.0770376	8.96888	2.99538e-19	2.43425e-18
SRD5A1	1580.96	0.756231	0.0843316	8.96735	3.03721e-19	2.46701e-18
VPS35	9592.68	0.576827	0.0643281	8.96695	3.04832e-19	2.4748e-18
[truncated: 15,642 more rows]
