# Supplementary material for: High-content synaptic phenotyping in human cellular models reveals a role for BET proteins in synapse assembly
Source: eLife. 2023 Apr 21;12:e80168. doi: 10.7554/eLife.80168 (PMC10121225; doi:10.7554/eLife.80168)
Supplement: Supplementary file 4. [file elife-80168-supp4.xlsx]

## Sheet: Sheet1
id	baseMean	log2FoldChange	lfcSE	stat	pvalue	padj
LOX	15779.4	-2.68443	0.0550926	-48.7259	0	0
CDH3	2634.18	-3.5732	0.0707858	-50.479	0	0
SIK1	10499.6	-2.42349	0.057674	-42.0205	0	0
ELFN2	1131.4	-5.64181	0.139776	-40.3632	0	0
MGAT5	14944.3	2.2972	0.0518643	44.2925	0	0
FOSB	1599.04	3.26023	0.0800163	40.7446	0	0
PADI2	20316.6	-3.98403	0.0522679	-76.2233	0	0
VCAN	118201	-2.7588	0.0627085	-43.994	0	0
GFPT2	9023.22	2.44404	0.058801	41.5645	0	0
TRIM22	4971.55	-2.81291	0.0675491	-41.6425	0	0
ANGPTL4	1826.22	3.90865	0.089209	43.8145	0	0
H3F3B	36973	1.71531	0.042061	40.7814	0	0
CPA4	4708.59	3.29501	0.0716875	45.9636	0	0
SERTAD4	1897.48	-3.03398	0.0768305	-39.4892	0	0
ALDH1L2	8549.34	-2.55268	0.0639561	-39.913	0	0
IL11	3586.95	3.39086	0.0783904	43.256	0	0
GDF15	1800.78	-3.33899	0.0757263	-44.0928	0	0
FGF5	12121.2	2.48979	0.0549556	45.3055	0	0
GALNT5	1985.22	-3.68327	0.0914528	-40.2751	0	0
TNS1	4857.83	-2.4411	0.0627027	-38.9314	0	0
PHGDH	4410.45	-2.71242	0.0607496	-44.6492	0	0
CD44	87071.7	2.21895	0.0537517	41.2815	0	0
SLC6A9	1094.02	-4.36057	0.107902	-40.4125	0	0
FAM198B	6345.44	-3.09687	0.0705876	-43.8727	0	0
MFAP5	8853.38	-2.77206	0.0594495	-46.6289	0	0
HMOX1	1614.41	-3.44198	0.0779817	-44.1383	0	0
NUPR1	3238.3	-6.8555	0.12478	-54.9405	0	0
MOCOS	1921.14	-3.46224	0.0819227	-42.2622	0	0
SLC44A5	5552.85	2.16765	0.0531687	40.7692	0	0
ARRDC4	40228.2	1.79688	0.041597	43.1973	0	0
GJB2	6074.7	-6.76419	0.171015	-39.5532	0	0
SYNPO2	1559.18	-3.08767	0.0817095	-37.7884	0	0
UTS2	3602.18	-3.24152	0.0769267	-42.1377	0	0
EGR1	10727.4	2.68934	0.0536514	50.1261	0	0
CBS	1959.96	-3.15491	0.0737126	-42.8002	0	0
GDF11	10184.9	2.83531	0.0571561	49.6065	0	0
IGFBP5	412323	-4.20367	0.0643725	-65.3023	0	0
EMILIN1	2977.3	-3.08455	0.0766481	-40.243	0	0
KCNH1	2124.09	-2.89835	0.0729167	-39.7488	0	0
POSTN	3057.09	-3.43822	0.0869093	-39.561	0	0
COL8A2	2960.03	-3.98921	0.0935857	-42.6263	0	0
PARP14	1743.08	-3.16953	0.0777778	-40.7511	0	0
LTBP1	14847.8	-2.21383	0.0577417	-38.3402	0	0
IGFBP3	39060.1	-4.30502	0.0536404	-80.257	0	0
OXTR	921.665	-4.51659	0.117385	-38.4767	0	0
AMIGO2	8994.56	-2.39724	0.0590704	-40.5828	0	0
SCRG1	2199.4	-3.69862	0.0791006	-46.7584	0	0
ADM2	1494.45	-4.29127	0.097322	-44.0936	0	0
IL7R	914.144	-5.4364	0.1448	-37.5443	0	0
BCAT1	12067.8	-2.46581	0.0613239	-40.2096	0	0
KCTD15	1796.63	-2.95785	0.0718838	-41.1477	0	0
THBS2	7709.56	-3.95645	0.0748728	-52.8423	0	0
APOL6	1722.68	-4.08463	0.0878641	-46.488	0	0
TNS3	5936.13	-3.54991	0.0679178	-52.2677	0	0
STC2	9779.3	-2.62961	0.0592782	-44.3605	0	0
EPAS1	2423.56	-2.44811	0.0649346	-37.7011	0	0
FLG	5458.5	-3.29039	0.0639409	-51.4598	0	0
ACTG2	9609.71	-2.48612	0.0653107	-38.0661	0	0
S100A6	3154.96	-2.59045	0.0595489	-43.5012	0	0
DDR2	15125.4	-3.17691	0.0589277	-53.9119	0	0
KIAA1199	6621.18	-4.91565	0.0815295	-60.2929	0	0
TLL2	2107.85	2.8393	0.0744677	38.128	0	0
HYAL2	5167.24	2.03482	0.0528201	38.5237	0	0
CCDC80	9586.67	-3.21063	0.0628331	-51.0977	0	0
ITGA11	19025	-2.72781	0.0557177	-48.9577	0	0
CREB3L1	6343.99	-2.40729	0.0635837	-37.8602	0	0
HIST2H2BE	3899.71	2.42572	0.0583634	41.5623	0	0
TRIB3	5145.9	-2.71609	0.0712134	-38.1402	0	0
PYCR1	3117.69	-2.60623	0.0610151	-42.7146	0	0
CSPG4	6495.01	-2.69705	0.0719642	-37.4777	2.12953e-307	4.95814e-305
COL12A1	33986.1	-2.59201	0.069218	-37.4471	6.69945e-307	1.53785e-304
CHST2	5640.11	2.08321	0.0560366	37.1759	1.67376e-302	3.78873e-300
PRICKLE1	12521	-2.14619	0.0579435	-37.0394	2.66241e-300	5.94411e-298
ANKRD1	43018.9	1.67677	0.045298	37.0165	6.21468e-300	1.36874e-297
PALMD	1078.13	-3.65834	0.0993709	-36.815	1.0639e-296	2.31193e-294
APOBEC3C	2072.79	-3.15529	0.0862152	-36.5978	3.09611e-293	6.63952e-291
MSC	1341.14	-3.05577	0.0838651	-36.4367	1.11856e-290	2.36758e-288
HIST1H2BD	1020.94	3.58808	0.0989096	36.2763	3.8226e-288	7.98728e-286
PAPPA	10357.5	-2.257	0.0622319	-36.2676	5.24616e-288	1.0823e-285
ERAP2	1428.33	-3.08497	0.0851521	-36.229	2.12988e-287	4.3391e-285
GBP3	1509.93	-2.97129	0.0820161	-36.2281	2.20041e-287	4.42744e-285
EGR3	984.824	3.99204	0.110516	36.1219	1.02913e-285	2.04546e-283
GPR124	7063.84	-1.87206	0.0519017	-36.0693	6.8715e-285	1.3493e-282
PCK2	2369.24	-2.40993	0.0668911	-36.0276	3.09048e-284	5.99626e-282
GRIK5	1377.44	-3.04068	0.0844053	-36.0247	3.43161e-284	6.57981e-282
PPM1L	4436.25	2.25109	0.0625322	35.9989	8.70019e-284	1.64879e-281
DHRS3	1222.69	-3.59052	0.099952	-35.9224	1.36443e-282	2.55603e-280
ACKR3	2346.87	-2.86074	0.0797616	-35.8661	1.03084e-281	1.90917e-279
MXRA5	34778	-2.48741	0.0694322	-35.825	4.51615e-281	8.27013e-279
PSAT1	13493.9	-1.75497	0.0493606	-35.5541	7.17212e-277	1.29879e-274
LOXL3	1574.96	-2.61371	0.0740547	-35.2943	7.1862e-273	1.28704e-270
ENC1	117409	1.52775	0.0434176	35.1874	3.11359e-271	5.5158e-269
GLCE	3243.4	2.29683	0.0657759	34.9191	3.81566e-267	6.68684e-265
HBEGF	13389.4	2.19723	0.0631085	34.8167	1.35972e-265	2.35753e-263
SORCS2	5075.45	-2.5835	0.0742163	-34.8104	1.69123e-265	2.90144e-263
LRRC17	3332.75	-2.63218	0.0760338	-34.6185	1.32949e-262	2.25709e-260
PEG10	47462.7	1.6455	0.0475376	34.6147	1.51745e-262	2.54963e-260
COL3A1	10707	-2.17468	0.0628901	-34.5791	5.21378e-262	8.67084e-260
FRMD4A	2036.49	-2.25147	0.0654862	-34.3809	4.8733e-259	8.02273e-257
SDC1	24578.5	-2.33506	0.0680585	-34.3096	5.65279e-258	9.21292e-256
SLC1A5	9097.14	-2.03706	0.0595093	-34.2309	8.38655e-257	1.35331e-254
PTPRU	3649.93	-1.93993	0.0566757	-34.2286	9.07803e-257	1.45053e-254
CYBRD1	2897.53	-2.45335	0.0719155	-34.1144	4.51039e-255	7.13692e-253
ANGPT1	1531.66	-3.75658	0.11018	-34.0951	8.72389e-255	1.36713e-252
C1S	3190.31	-2.44058	0.0717615	-34.0096	1.60712e-253	2.49455e-251
ELN	2831.05	-2.65346	0.0783146	-33.882	1.22669e-251	1.88609e-249
TUBB3	37325.1	1.99553	0.0589665	33.8417	4.79975e-251	7.31088e-249
SLC6A8	15916.9	1.52843	0.0451754	33.8332	6.41347e-251	9.6784e-249
LUM	867.527	-4.54543	0.13452	-33.79	2.76807e-250	4.1389e-248
CLMP	834.44	-3.7129	0.110006	-33.7518	1.00435e-249	1.48807e-247
DGCR2	14196	1.64448	0.0488549	33.6606	2.18449e-248	3.20746e-246
FGF11	3836.46	-1.99716	0.0595285	-33.5496	9.12329e-247	1.3276e-244
METTL7B	946.998	3.25681	0.0970998	33.5408	1.2241e-246	1.76553e-244
EFNB2	24669	1.61173	0.0482983	33.3704	3.6841e-244	5.26697e-242
RUNX2	4027.55	-2.08313	0.0626209	-33.2656	1.21278e-242	1.71878e-240
MMP15	7502.97	1.79931	0.0542104	33.1913	1.43684e-241	2.01876e-239
CHST11	6014.94	1.81197	0.0549076	33.0003	8.04138e-239	1.12016e-236
B3GALT1	1071.64	3.11485	0.0945275	32.9518	3.98466e-238	5.50355e-236
MFAP4	2476.57	-2.55817	0.0776637	-32.9391	6.06445e-238	8.30575e-236
FOS	1708.09	2.38105	0.0728233	32.6963	1.76149e-234	2.3924e-232
NDRG1	4578.55	-1.72425	0.052865	-32.6161	2.42829e-233	3.27077e-231
CXCL12	5164.99	-1.99118	0.0611332	-32.5713	1.0475e-232	1.39935e-230
GPM6B	7211.53	2.21981	0.0681847	32.5559	1.73013e-232	2.29249e-230
ZNF532	6366.6	-1.59028	0.0488744	-32.5382	3.07683e-232	4.04405e-230
ADAMTS6	1381.35	-2.893	0.0889566	-32.5215	5.29969e-232	6.90995e-230
GPX8	5749.94	-1.89044	0.0583599	-32.3928	3.46528e-230	4.48232e-228
CAV1	8716.48	-1.71712	0.0530111	-32.3917	3.59035e-230	4.60753e-228
ALDH1B1	3665.33	-1.94587	0.0601126	-32.3704	7.16431e-230	9.12218e-228
TMEM45A	2847.59	-1.96057	0.061183	-32.0444	2.62862e-225	3.32102e-223
APOL2	1701.1	-2.22539	0.0695408	-32.0012	1.04955e-224	1.31582e-222
XPOT	13635.8	-1.60306	0.0501443	-31.9689	2.94857e-224	3.66838e-222
SAMD9L	1389.89	-2.59633	0.0819365	-31.687	2.34428e-220	2.89447e-218
SH3BP5	12489.1	1.57378	0.0496723	31.6831	2.65194e-220	3.24973e-218
IGDCC4	922.445	-2.94464	0.0930891	-31.6325	1.32081e-219	1.60646e-217
MYL9	30582.2	-1.61772	0.0512759	-31.5494	1.82926e-218	2.20839e-216
SEMA3F	4335.38	1.84113	0.0583947	31.529	3.47952e-218	4.1698e-216
NPR3	1173.49	-2.49822	0.0794195	-31.456	3.47888e-217	4.1386e-215
LIF	21950.8	1.95791	0.062465	31.3442	1.16788e-215	1.37928e-213
MIDN	14303.4	1.71627	0.0548398	31.296	5.29313e-215	6.20629e-213
CD109	1737.27	-2.39768	0.0768518	-31.1988	1.10682e-213	1.28849e-211
PIPOX	971.964	-2.88147	0.0923981	-31.1854	1.68342e-213	1.94585e-211
ITGA4	10906	-2.07845	0.0666491	-31.185	1.70458e-213	1.95642e-211
FILIP1L	23922	-2.11844	0.0680521	-31.1297	9.53507e-213	1.08673e-210
NFATC2	1327.37	3.14732	0.101171	31.1088	1.83325e-212	2.07488e-210
GBP1	1240.63	-2.54898	0.0820335	-31.0724	5.68415e-212	6.38898e-210
MDFI	745.674	-3.8106	0.122675	-31.0626	7.69954e-212	8.59501e-210
RHOB	8727.54	1.82094	0.058665	31.0397	1.57309e-211	1.7441e-209
RP11-383H13.1	1141.28	-2.64428	0.0855531	-30.908	9.32258e-210	1.02662e-207
SP100	1380.46	-2.29665	0.0744038	-30.8673	3.27836e-209	3.58595e-207
COL1A2	718250	-2.06016	0.0668809	-30.8034	2.36115e-208	2.56547e-206
CHAC1	1762.34	-2.11829	0.0688815	-30.7526	1.12716e-207	1.21659e-205
DCBLD2	81452.9	1.96772	0.0640776	30.7084	4.3952e-207	4.71269e-205
FMN1	1927.21	-2.08529	0.0680036	-30.6644	1.70018e-206	1.81108e-204
TMEM2	30250.2	1.69262	0.0552001	30.6635	1.74868e-206	1.85065e-204
TSPAN18	805.29	-3.18132	0.103843	-30.6357	4.09359e-206	4.30434e-204
ZNF469	1437.23	-2.61081	0.0855514	-30.5175	1.52855e-204	1.59694e-202
EFR3B	3816.55	2.25231	0.0738121	30.5141	1.69422e-204	1.75875e-202
ADCY7	919.87	-2.79651	0.0917672	-30.474	5.76044e-204	5.942e-202
COL6A3	13397.6	-5.0946	0.167979	-30.3288	4.78939e-202	4.90928e-200
MYOF	22837.9	-1.95016	0.0643114	-30.3236	5.59378e-202	5.69796e-200
C15orf52	1644.94	-2.43511	0.0803933	-30.29	1.55346e-201	1.57257e-199
GDE1	10053.7	1.51574	0.0500518	30.2833	1.90044e-201	1.91193e-199
PLAU	8554.62	-2.19677	0.0726241	-30.2486	5.44769e-201	5.44702e-199
LZTS1	6940.65	1.58646	0.0525721	30.1769	4.75485e-200	4.72528e-198
ITIH5	640.754	-3.57126	0.118409	-30.1603	7.8513e-200	7.75518e-198
PBX3	4960.87	1.65471	0.0548807	30.1511	1.03693e-199	1.01806e-197
WARS	22715	-1.42841	0.0474438	-30.1075	3.86826e-199	3.77515e-197
H2AFX	1744.82	2.11903	0.0704863	30.063	1.47643e-198	1.43231e-196
OTOGL	723.642	-3.05629	0.101769	-30.0316	3.79343e-198	3.6583e-196
ODC1	28151	1.44119	0.0480668	29.9831	1.63044e-197	1.56312e-195
DCXR	2723.38	2.06963	0.0690718	29.9634	2.94334e-197	2.8053e-195
ANGPTL2	1047.26	-2.74164	0.0915936	-29.9326	7.40798e-197	7.01949e-195
SIPA1L2	8020.99	1.75263	0.0586582	29.8786	3.73068e-196	3.5146e-194
SFRP2	4464.75	-2.04887	0.0686018	-29.8661	5.42075e-196	5.07743e-194
ADAMTS9	13884	1.83654	0.0615017	29.8616	6.20946e-196	5.78296e-194
C19orf66	702.911	-3.66005	0.122606	-29.852	8.25868e-196	7.64773e-194
NPR2	1258.57	-2.51552	0.0843394	-29.8262	1.78963e-195	1.64788e-193
INHBA	1295.88	-2.83372	0.0952573	-29.748	1.8395e-194	1.68428e-192
COPZ2	1050.76	-2.66232	0.0898295	-29.6374	4.92727e-193	4.48629e-191
PLEKHG4B	777.765	-3.10364	0.104727	-29.6354	5.22742e-193	4.73314e-191
CNN1	6983.11	-1.65124	0.0557838	-29.6008	1.46071e-192	1.31528e-190
MYH11	531.931	-4.00421	0.135532	-29.5443	7.76897e-192	6.95707e-190
CHD3	7314.94	-1.4841	0.0502874	-29.5123	2.00147e-191	1.78251e-189
SEMA3C	38551	1.90737	0.0647031	29.4788	5.39091e-191	4.77506e-189
BAIAP2L1	615.012	-3.35689	0.114341	-29.3586	1.8537e-189	1.63306e-187
COL11A1	42988.4	-1.58936	0.0542288	-29.3085	8.09057e-189	7.08925e-187
PPP1R3C	17478.7	-1.5049	0.0513669	-29.297	1.13121e-188	9.85904e-187
EMP3	726.681	-3.14873	0.107521	-29.2848	1.62116e-188	1.40541e-186
PAMR1	4891.8	-1.7987	0.0614769	-29.2582	3.53656e-188	3.04968e-186
SHROOM2	938.243	-2.94881	0.101088	-29.1707	4.56366e-187	3.91466e-185
LFNG	2306.7	1.95776	0.0671391	29.1597	6.28855e-187	5.36601e-185
ABTB2	1392.18	2.19783	0.0755493	29.0913	4.61954e-186	3.92132e-184
NDNF	561.744	-3.88809	0.13381	-29.0567	1.26476e-185	1.06537e-183
PDGFRB	2168.12	-2.09286	0.0720271	-29.0567	1.26814e-185	1.06537e-183
ITFG3	12922.1	1.42118	0.0489287	29.046	1.72614e-185	1.4427e-183
ANXA11	5084.21	-1.62078	0.0561107	-28.8853	1.82493e-183	1.51749e-181
SERPINA3	12308	-2.13378	0.0741492	-28.7768	4.18746e-182	3.46432e-180
BAIAP2	3415.94	1.91937	0.0667171	28.7689	5.26278e-182	4.33196e-180
LONRF2	7083.89	1.60964	0.0559597	28.7642	6.02036e-182	4.93065e-180
HEXIM1	9269.61	1.76273	0.061419	28.7001	3.8036e-181	3.09955e-179
AEBP1	4622.25	-2.03178	0.0708088	-28.694	4.53648e-181	3.67839e-179
MCHR1	1425.32	-2.07565	0.072372	-28.6803	6.72119e-181	5.42287e-179
ANPEP	781.711	-3.0526	0.106453	-28.6757	7.67791e-181	6.16427e-179
SLC7A11	6683.64	-2.09225	0.0729823	-28.668	9.56887e-181	7.64478e-179
DIO2	527.311	-4.37323	0.152559	-28.6659	1.01602e-180	8.07763e-179
INPP5D	483.634	-4.90542	0.171142	-28.6629	1.10832e-180	8.76862e-179
FAP	812.01	-2.88175	0.100584	-28.6501	1.59642e-180	1.25693e-178
AKNA	1605.04	-2.10748	0.0737333	-28.5825	1.10749e-179	8.67785e-178
H1F0	5253.47	1.73168	0.0606552	28.5495	2.84607e-179	2.21939e-177
MT2A	2462.12	2.09901	0.0735327	28.5452	3.22058e-179	2.49948e-177
ITPKB	1026.93	-2.82374	0.0992824	-28.4415	6.20534e-178	4.79311e-176
SH2D4A	1558.57	-2.03117	0.0714301	-28.4357	7.31316e-178	5.62216e-176
GARS	18354.1	-1.31649	0.0464808	-28.3233	1.78695e-176	1.36731e-174
BGN	8829.4	-1.80002	0.0636958	-28.2596	1.08422e-175	8.25727e-174
CYP1B1	5614.21	-2.29156	0.0812729	-28.1958	6.57645e-175	4.98526e-173
HN1	13287.8	1.3913	0.049346	28.1947	6.78583e-175	5.12016e-173
COL16A1	498.435	-3.9433	0.139961	-28.1742	1.21125e-174	9.09725e-173
PTCHD4	676.15	-3.40885	0.121091	-28.1512	2.31774e-174	1.73278e-172
GYPC	483.403	-3.99636	0.142346	-28.0749	1.98189e-173	1.47492e-171
ZNF618	1741.93	-1.98425	0.0707783	-28.0348	6.12042e-173	4.53412e-171
HOXB4	4304.58	1.90605	0.0680483	28.0103	1.21788e-172	8.98144e-171
EIF4EBP2	16612.1	1.34631	0.048094	27.9933	1.96287e-172	1.44103e-170
HKDC1	514.051	-5.73639	0.205	-27.9824	2.65982e-172	1.94393e-170
CDH6	4328.39	1.89493	0.0678659	27.9216	1.45851e-171	1.06119e-169
FIBIN	826.811	-3.04071	0.108944	-27.9108	1.97534e-171	1.43085e-169
SOX6	771.482	-2.75843	0.0989224	-27.8848	4.07408e-171	2.93803e-169
GPNMB	1050.89	-2.35973	0.0846735	-27.8685	6.42031e-171	4.60961e-169
FST	1048.33	-2.54825	0.0914578	-27.8625	7.59328e-171	5.42786e-169
DDIT4	16642.4	-1.38851	0.0499079	-27.8215	2.38223e-170	1.69544e-168
YPEL1	2045.54	1.89397	0.0681149	27.8055	3.72529e-170	2.63978e-168
NPTXR	3405.29	1.76662	0.0635615	27.7938	5.15017e-170	3.63366e-168
BTN3A1	911.705	-2.5401	0.0920614	-27.5914	1.41153e-167	9.91598e-166
NEU1	4535.84	1.42947	0.051943	27.52	1.01305e-166	7.08611e-165
DOCK11	3502.67	1.61659	0.058823	27.4823	2.85618e-166	1.98931e-164
TGFB3	1490.68	-1.89641	0.0690705	-27.4562	5.86264e-166	4.06593e-164
ARHGEF5	497.781	-3.73962	0.136342	-27.4281	1.26733e-165	8.7521e-164
WNT2B	566.471	-3.11116	0.113588	-27.3899	3.62086e-165	2.48999e-163
EPS8L2	2115.89	-2.23222	0.0815982	-27.3563	9.09557e-165	6.22856e-163
DUSP5	1917.07	1.9463	0.0712122	27.331	1.81678e-164	1.2389e-162
PAPPA2	461.001	-3.98113	0.145849	-27.2963	4.69362e-164	3.18736e-162
FAM13C	1910.43	-1.75049	0.0641661	-27.2807	7.19515e-164	4.86583e-162
SEMA6A	3290.56	1.58271	0.058017	27.2801	7.30972e-164	4.92288e-162
PITPNA	10885	1.31663	0.0483403	27.2367	2.38974e-163	1.60279e-161
PLEKHA2	3395.74	-1.54123	0.0567932	-27.1376	3.54804e-162	2.36992e-160
NALCN	1606.7	-2.03333	0.0751978	-27.0398	5.03343e-161	3.34836e-159
ARHGAP31	3946.98	-1.56843	0.0582188	-26.9402	7.42584e-160	4.91977e-158
SCN2A	1206.47	-2.17986	0.0809289	-26.9355	8.4379e-160	5.56765e-158
ANXA3	1007.56	-2.34966	0.0873596	-26.8964	2.41804e-159	1.58908e-157
BACE1	17010.6	1.26606	0.0470784	26.8926	2.67776e-159	1.7527e-157
KCNN4	468.039	-3.77648	0.140556	-26.8681	5.18562e-159	3.38061e-157
NTM	3735.04	-1.91927	0.0715831	-26.8118	2.35629e-158	1.52999e-156
PHF17	3382.55	-1.48556	0.055411	-26.8099	2.47722e-158	1.60214e-156
ITGA2	3288.97	1.90008	0.0710258	26.752	1.17039e-157	7.53956e-156
LCTL	420.79	-4.91511	0.183965	-26.7176	2.93691e-157	1.88448e-155
H1FX	5253.16	1.44778	0.0542158	26.704	4.23317e-157	2.70558e-155
CARD8	605.675	-3.15864	0.118406	-26.6763	8.8656e-157	5.6442e-155
MSRB3	5779.17	-1.49752	0.0563112	-26.5936	8.05483e-156	5.10808e-154
HCFC1R1	2238.4	1.88475	0.0710048	26.544	3.01033e-155	1.90164e-153
KANK1	1972.26	-1.78792	0.0673893	-26.5313	4.22532e-155	2.65885e-153
HFE	410.32	-4.3455	0.163972	-26.5015	9.31523e-155	5.83921e-153
TFRC	16316.8	1.55708	0.0587827	26.4887	1.3075e-154	8.16459e-153
SLFN5	24473	-1.4257	0.0538544	-26.4732	1.97485e-154	1.22848e-152
CERCAM	3962.02	-1.56556	0.0593141	-26.3945	1.58549e-153	9.82524e-152
MYO1C	7559.59	-1.31194	0.0498489	-26.3184	1.18087e-152	7.29005e-151
HIST1H2AC	1946.51	1.89188	0.0719931	26.2787	3.3622e-152	2.06782e-150
INHBB	462.819	-3.95951	0.151167	-26.1929	3.20242e-151	1.96215e-149
YARS	9429.08	-1.19645	0.0457896	-26.1293	1.69464e-150	1.03057e-148
IARS	21136.3	-1.33576	0.0511209	-26.1294	1.69099e-150	1.03057e-148
ATF4	20762.1	-1.24306	0.0475748	-26.1286	1.72738e-150	1.04657e-148
SLC12A7	863.282	-2.51306	0.0961938	-26.125	1.89546e-150	1.14416e-148
CPS1	513.068	-3.32011	0.127254	-26.0904	4.68599e-150	2.81817e-148
ME1	2815.48	-1.50643	0.0578388	-26.0454	1.51815e-149	9.09659e-148
SLC22A23	2542.37	1.77648	0.0682966	26.0113	3.68877e-149	2.20218e-147
SNTB1	405.336	-3.88663	0.149431	-26.0095	3.86478e-149	2.29884e-147
CDC42EP1	2428.66	-1.77421	0.0682363	-26.001	4.82635e-149	2.86036e-147
TGFBRAP1	1924.44	-1.74549	0.0673139	-25.9306	3.00713e-148	1.77573e-146
PARP9	850.731	-2.3414	0.090476	-25.8787	1.15822e-147	6.81469e-146
CRIM1	34631.7	1.32777	0.0516002	25.7318	5.14674e-146	3.01732e-144
ST6GALNAC5	4560.1	1.63769	0.0637206	25.7011	1.13723e-145	6.64323e-144
SEZ6	1985.73	-1.70135	0.0664362	-25.6087	1.21957e-144	7.09874e-143
SEMA6C	1945.64	1.81714	0.0709613	25.6074	1.26174e-144	7.31807e-143
SLC2A12	3923	-1.81548	0.0709498	-25.5882	2.06584e-144	1.19394e-142
MEGF10	1204.68	-2.28166	0.0892107	-25.576	2.81958e-144	1.6238e-142
HMGA1	6206.87	1.80309	0.0710711	25.3702	5.37611e-142	3.0852e-140
SSH3	710.964	-2.42041	0.0959488	-25.226	2.07577e-140	1.18705e-138
AK4	11796.7	-1.23607	0.0491253	-25.1615	1.05669e-139	6.02164e-138
PRDM1	1273.81	-1.8893	0.0751343	-25.1456	1.57968e-139	8.97063e-138
CECR1	1709.8	-1.71672	0.068324	-25.1262	2.57285e-139	1.45598e-137
SPEG	3226.38	-1.97243	0.0785295	-25.1171	3.23241e-139	1.8229e-137
MAP2K3	2247.74	1.55388	0.0619144	25.0973	5.32254e-139	2.99127e-137
VDR	808.551	-2.36379	0.0944012	-25.0398	2.2529e-138	1.26178e-136
EXTL3	14211.8	1.2556	0.0501503	25.0368	2.42983e-138	1.35621e-136
TTLL12	2570.93	1.64014	0.0657445	24.9472	2.29149e-137	1.27463e-135
S100A10	23111.7	1.17206	0.047	24.9374	2.92289e-137	1.62031e-135
PARP3	462.335	-3.05382	0.12258	-24.9129	5.38702e-137	2.97619e-135
S100A11	11508.4	-1.38128	0.055541	-24.8696	1.58663e-136	8.7361e-135
SRC	1879.11	-1.59682	0.0642143	-24.8671	1.6902e-136	9.27506e-135
SORBS3	2096.99	-1.71318	0.0690269	-24.819	5.5918e-136	3.05823e-134
TPD52L1	945.653	-2.17979	0.0878319	-24.8178	5.76711e-136	3.14356e-134
BRD2	22220.2	1.14343	0.0461015	24.8024	8.44758e-136	4.58929e-134
WNT5B	936.204	-2.23514	0.0901811	-24.785	1.29953e-135	7.03646e-134
STARD13	3302.59	1.41437	0.0570814	24.7781	1.54457e-135	8.33559e-134
MARCKSL1	25894.3	1.28527	0.0519566	24.7373	4.24907e-135	2.28552e-133
COL15A1	391.957	-3.9155	0.158521	-24.7002	1.06297e-134	5.69877e-133
FOXD1	4039.66	1.33619	0.0541414	24.6797	1.76787e-134	9.44681e-133
SYNE1	10079.7	-1.87246	0.0758805	-24.6764	1.91727e-134	1.02117e-132
PLN	943.221	-2.38779	0.096798	-24.6678	2.37235e-134	1.25943e-132
TMBIM1	2531.42	-1.65667	0.0671614	-24.6669	2.42321e-134	1.28226e-132
MTHFD2	11821.9	-1.41493	0.0574121	-24.6451	4.15044e-134	2.18912e-132
COL1A1	1.20476e+06	-1.90089	0.0773836	-24.5645	3.02882e-133	1.59238e-131
BTBD11	1547.64	1.84451	0.0752554	24.51	1.15562e-132	6.05604e-131
GALC	1550.95	-1.75323	0.0715421	-24.5062	1.26822e-132	6.62483e-131
MEGF9	6588.32	1.40509	0.0573627	24.4949	1.67516e-132	8.72259e-131
PCSK5	2695.68	1.58381	0.0646644	24.4929	1.76026e-132	9.13655e-131
EPHB1	1330.44	2.01387	0.0823065	24.468	3.23968e-132	1.6762e-130
TBCD	5716.07	1.34023	0.054901	24.4117	1.28382e-131	6.6214e-130
SRGAP2	8019.53	1.26492	0.0518223	24.4088	1.37871e-131	7.0884e-130
ZCCHC14	5759.61	1.29009	0.0528573	24.4071	1.43791e-131	7.36954e-130
TNFAIP2	658.332	-2.90688	0.119108	-24.4054	1.4987e-131	7.65699e-130
SAMD9	436.709	-4.02234	0.164865	-24.3977	1.80768e-131	9.20675e-130
TRIB2	11425.1	1.17842	0.0483343	24.3806	2.74788e-131	1.39517e-129
ARHGEF25	1153.05	-1.84648	0.0757563	-24.374	3.22814e-131	1.63392e-129
SERPINH1	53284.7	-1.3779	0.0566822	-24.3092	1.56815e-130	7.91259e-129
ARL6IP1	8501.96	1.37513	0.0565688	24.309	1.57349e-130	7.91507e-129
ZNF395	2377.92	-1.45917	0.0600285	-24.308	1.61283e-130	8.08795e-129
DNASE2	1546.98	-1.68677	0.0694042	-24.3036	1.79516e-130	8.97469e-129
NT5E	2054.05	1.517	0.0624452	24.2933	2.30681e-130	1.14974e-128
MARVELD1	3253.18	-1.57548	0.0648889	-24.2797	3.21609e-130	1.59804e-128
TPM2	85956.5	-1.22275	0.0504995	-24.2131	1.61997e-129	8.02499e-128
UROD	1330.17	-1.84255	0.0761538	-24.1951	2.50247e-129	1.23592e-127
DUSP6	3193.32	1.57176	0.0651191	24.1367	1.02927e-128	5.06799e-127
DAG1	27984.8	1.39577	0.0578329	24.1345	1.0858e-128	5.33021e-127
H2AFY2	1561.6	-1.73072	0.0717434	-24.1238	1.40809e-128	6.89159e-127
KRT7	551.441	-6.89853	0.286156	-24.1076	2.08204e-128	1.01596e-126
PDE1C	9330.52	-1.32061	0.0547982	-24.0994	2.53465e-128	1.23313e-126
NPAS2	1740.38	-1.68066	0.0697566	-24.0931	2.95128e-128	1.43155e-126
H2AFV	8095.98	1.21161	0.0503691	24.0547	7.45387e-128	3.60484e-126
SEMA7A	1820.84	1.72175	0.0715865	24.0514	8.07975e-128	3.89597e-126
HERPUD1	8551.86	-1.30351	0.0542477	-24.0288	1.39165e-127	6.69059e-126
ERAP1	1754.84	-1.74869	0.0728172	-24.0148	1.94693e-127	9.33266e-126
FAM222A	570.448	2.67674	0.111489	24.009	2.24112e-127	1.07114e-125
SYTL2	6977.74	-1.24825	0.0520292	-23.9912	3.43178e-127	1.63542e-125
ANGPTL7	452.25	-6.44388	0.268728	-23.9792	4.58217e-127	2.17727e-125
TRIP6	1733.37	-1.70286	0.0710463	-23.9683	5.96253e-127	2.82492e-125
ITGA3	31136.8	1.19409	0.0498283	23.9642	6.57451e-127	3.10584e-125
TBC1D2	1141.22	-1.88992	0.0789855	-23.9275	1.58594e-126	7.47043e-125
CPNE1	5125.37	1.26812	0.0530745	23.8933	3.59766e-126	1.68976e-124
CTSL	3575.08	-1.34609	0.0563607	-23.8834	4.55356e-126	2.13258e-124
TSPO	1352.52	-1.80472	0.0756334	-23.8614	7.71851e-126	3.60448e-124
FRZB	2367.4	1.68218	0.0705179	23.8546	9.0761e-126	4.22635e-124
TNIK	6248.79	1.37038	0.0574622	23.8483	1.05383e-125	4.89325e-124
TBC1D8	1020.12	2.06722	0.0866841	23.8478	1.06759e-125	4.94308e-124
LRRC15	1651.76	-2.01315	0.0844274	-23.8448	1.14723e-125	5.29674e-124
GPR125	5546.76	1.37097	0.05753	23.8305	1.61198e-125	7.42148e-124
PARP10	375.683	-3.33428	0.140287	-23.7675	7.23782e-125	3.32287e-123
SYNC	2519.39	-1.51042	0.0636009	-23.7484	1.14161e-124	5.2264e-123
TSPAN11	555.24	-2.96394	0.124861	-23.7379	1.46399e-124	6.68348e-123
MZT2B	1258.25	-1.85016	0.0779536	-23.7342	1.60028e-124	7.28532e-123
AMPH	1782.32	1.57158	0.0662968	23.7052	3.18959e-124	1.44802e-122
TNFRSF19	4993.81	-1.46403	0.0619217	-23.6433	1.38434e-123	6.26722e-122
NMT2	2504.99	1.46286	0.0619779	23.603	3.59435e-123	1.62273e-121
PSMB8	489.759	-2.97322	0.125989	-23.5989	3.95402e-123	1.78018e-121
CTGF	93197.6	1.27152	0.0539272	23.5785	6.41316e-123	2.87938e-121
TIMP3	79204.7	-1.22519	0.0519867	-23.5674	8.33266e-123	3.73093e-121
COL5A3	3353.51	-1.92933	0.0820645	-23.5099	3.22729e-122	1.44105e-120
RARG	837.964	-2.06088	0.0876729	-23.5065	3.50044e-122	1.55875e-120
SCG2	19392	-1.19345	0.0507928	-23.4964	4.43647e-122	1.97018e-120
BCL2L11	3371.32	1.41188	0.0600899	23.4961	4.47074e-122	1.98e-120
SH3PXD2A	12242.3	-1.23724	0.0526674	-23.4916	4.96855e-122	2.19451e-120
C16orf62	3005.95	-1.3588	0.0579713	-23.4392	1.7042e-121	7.50676e-120
MT1X	863.279	2.0751	0.088562	23.4311	2.06222e-121	9.05932e-120
RAB13	5112.36	-1.22468	0.0523104	-23.4118	3.2427e-121	1.42069e-119
TFPI	409.856	-3.49517	0.149363	-23.4006	4.21496e-121	1.8417e-119
KCNS1	305.595	-4.27942	0.18318	-23.3618	1.04573e-120	4.55705e-119
MMP19	380.147	-3.28052	0.140448	-23.3576	1.15242e-120	5.00857e-119
MAP3K3	3039.27	1.31088	0.056155	23.3439	1.59071e-120	6.89506e-119
SYNPO	23660	-1.1175	0.0479655	-23.2979	4.65433e-120	2.0121e-118
FNDC1	24222.7	-1.47402	0.0634639	-23.2262	2.47709e-119	1.06803e-117
KDELR3	1178.5	-1.98252	0.0854939	-23.1891	5.87138e-119	2.52485e-117
MCL1	40504.2	1.07654	0.0465034	23.1497	1.46441e-118	6.28078e-117
FRMD5	5134.14	1.23586	0.053393	23.1465	1.57514e-118	6.73795e-117
TOM1L1	917.382	-1.99231	0.0860779	-23.1455	1.61539e-118	6.89206e-117
RABIF	1890.79	1.48727	0.0642613	23.144	1.66944e-118	7.10406e-117
NDST1	30272.4	-1.15427	0.050006	-23.0826	6.92124e-118	2.93756e-116
ALDH3B1	849.97	-1.97538	0.0856874	-23.0533	1.36371e-117	5.77291e-116
LRRC4B	416.346	-2.91335	0.126416	-23.0457	1.62269e-117	6.85146e-116
SEMA3A	1816.12	-1.6232	0.0704362	-23.045	1.65188e-117	6.95668e-116
IGF2BP1	3276.58	-1.26562	0.0549279	-23.0416	1.78769e-117	7.50923e-116
MMP2	27515.5	-1.29824	0.0563979	-23.0193	2.9889e-117	1.25226e-115
RPE65	401.373	-3.33906	0.145343	-22.9736	8.57041e-117	3.58155e-115
FAM114A1	9381.89	-1.22151	0.053191	-22.9646	1.05384e-116	4.39269e-115
ABCA3	7044.03	1.37759	0.0600492	22.9411	1.80937e-116	7.52272e-115
FBXO2	552.883	-2.43192	0.106048	-22.9322	2.22045e-116	9.20836e-115
GPR1	1168.72	-4.98135	0.21727	-22.927	2.50053e-116	1.03436e-114
TRNP1	2168.68	1.52767	0.0666491	22.9211	2.86062e-116	1.18031e-114
CNNM3	1555.81	1.59657	0.0696953	22.9078	3.8803e-116	1.597e-114
CCND2	6913.19	-1.39342	0.0608543	-22.8977	4.89531e-116	2.00967e-114
KCNE4	1251.2	-1.78989	0.0783287	-22.851	1.42782e-115	5.8469e-114
STIM2	3020.01	1.39858	0.0612402	22.8376	1.94124e-115	7.92942e-114
CC2D2A	1247.04	-1.83325	0.0802912	-22.8325	2.18164e-115	8.88911e-114
DYSF	1068.21	-2.16467	0.0948177	-22.8298	2.31845e-115	9.42298e-114
TP53	6229.96	-1.13969	0.0499234	-22.8287	2.37897e-115	9.64487e-114
MICALL1	4633.16	-1.40426	0.0615617	-22.8106	3.59623e-115	1.45438e-113
MID1IP1	1321.81	-1.65512	0.0726722	-22.7752	8.08463e-115	3.26147e-113
NME4	1890.5	-1.59648	0.0701168	-22.7689	9.32982e-115	3.7545e-113
SYT11	28802.9	1.15697	0.0508493	22.753	1.34041e-114	5.3808e-113
TEX2	10566.7	1.23255	0.054201	22.7403	1.78931e-114	7.16515e-113
KRT80	478.882	-2.83923	0.12488	-22.7357	1.98653e-114	7.93543e-113
2022-03-08	1644.93	-1.49869	0.0659231	-22.7338	2.074e-114	8.26457e-113
SLIT2	4819.96	1.24857	0.0549483	22.7226	2.67811e-114	1.06458e-112
SH3D19	8402.9	-1.11377	0.0491635	-22.6544	1.26323e-113	5.00928e-112
CDKN2B	9225.77	-1.32385	0.0584618	-22.6447	1.57457e-113	6.22871e-112
PFKFB3	20338	1.00914	0.044578	22.6376	1.84731e-113	7.28994e-112
FBLN5	2229.22	-1.56069	0.0689686	-22.6291	2.24381e-113	8.83324e-112
TAPBP	5859.14	-1.26741	0.0561534	-22.5705	8.4513e-113	3.31902e-111
TGFB1	12718.4	1.15481	0.0512985	22.5117	3.19068e-112	1.25004e-110
RHOBTB1	2368.51	-1.36248	0.0605244	-22.5112	3.22214e-112	1.25934e-110
BTN3A2	617.532	-2.50253	0.111219	-22.501	4.06103e-112	1.58341e-110
TBKBP1	1076.51	-1.79035	0.0796309	-22.4831	6.0796e-112	2.3648e-110
MUC1	417.211	-2.9011	0.129037	-22.4828	6.12038e-112	2.375e-110
PTHLH	1504.61	1.79447	0.0799912	22.4334	1.85956e-111	7.19884e-110
SLC7A5	33221.8	-1.21437	0.0542186	-22.3976	4.15452e-111	1.60451e-109
FBLIM1	8017.87	-1.25975	0.0563219	-22.3669	8.26673e-111	3.18513e-109
LIMS2	1355.81	-1.88096	0.0841894	-22.3421	1.44225e-110	5.54383e-109
SLC38A1	8476	-1.23729	0.0553882	-22.3385	1.56121e-110	5.98695e-109
KIF26B	7917.95	-1.37447	0.0615558	-22.3288	1.94096e-110	7.42576e-109
PIK3R3	8032.32	1.0649	0.0477724	22.2911	4.50643e-110	1.72004e-108
SLC3A2	14708.6	-1.19633	0.0537073	-22.275	6.46052e-110	2.46013e-108
OSBPL6	3995.11	1.29505	0.0581669	22.2643	8.1913e-110	3.11193e-108
FAT3	8334.91	1.7087	0.0768185	22.2433	1.30831e-109	4.95878e-108
DTX3L	1235.28	-1.87455	0.0845288	-22.1764	5.80113e-109	2.19366e-107
SNAI2	3195.35	-1.45672	0.0657004	-22.1721	6.38231e-109	2.40784e-107
AGO1	9825.26	1.09292	0.0494058	22.1213	1.97304e-108	7.42646e-107
UFC1	2205.84	-1.35583	0.0613765	-22.0904	3.90978e-108	1.46824e-106
S100A13	725.312	-2.15495	0.0977329	-22.0493	9.69088e-108	3.63085e-106
NFYA	3719.66	1.20149	0.0545002	22.0457	1.05101e-107	3.92875e-106
LARP6	2518.31	-1.47543	0.0669594	-22.0347	1.34061e-107	4.99983e-106
ANXA4	2109.99	-1.43855	0.0652914	-22.0327	1.40001e-107	5.20943e-106
ASIC1	1516.39	-1.51231	0.0687649	-21.9924	3.40439e-107	1.26389e-105
ARAP1	1786.59	-1.56024	0.0709959	-21.9765	4.83069e-107	1.78933e-105
RASL11B	1989.33	-1.67434	0.0762112	-21.9698	5.60255e-107	2.07053e-105
FAM46A	3281.53	-1.27484	0.0580572	-21.9583	7.21748e-107	2.66132e-105
AASS	1519.38	1.90749	0.0869151	21.9466	9.34218e-107	3.437e-105
NYNRIN	314.446	-3.44901	0.157333	-21.9217	1.61466e-106	5.92697e-105
CCND3	3027.25	1.39902	0.0638412	21.9141	1.90776e-106	6.98711e-105
TRIM14	696.97	-2.09767	0.0957692	-21.9034	2.4094e-106	8.80459e-105
C3orf58	5494.86	1.68339	0.077015	21.8579	6.54049e-106	2.38472e-104
TRIM38	611.092	-2.17696	0.0996332	-21.8498	7.81499e-106	2.84305e-104
TTL	7686.17	1.03271	0.0472809	21.842	9.26019e-106	3.36131e-104
ANO4	3423.81	1.55953	0.0714413	21.8295	1.21661e-105	4.40628e-104
ADAMTS16	5592.68	-1.42456	0.0652908	-21.8187	1.54277e-105	5.57519e-104
IFITM3	5915.58	-1.22591	0.0562337	-21.8002	2.30886e-105	8.32517e-104
B3GALT2	795.652	-2.00903	0.0921967	-21.7907	2.84523e-105	1.02365e-103
PODNL1	796.597	-2.14078	0.0983165	-21.7743	4.06202e-105	1.45821e-103
SLITRK6	279.444	-4.55395	0.209423	-21.7452	7.66673e-105	2.74621e-103
SLC9A3R1	4286.7	1.21791	0.056071	21.7208	1.30369e-104	4.65954e-103
NOTCH3	7629.12	-1.31395	0.0605493	-21.7004	2.03315e-104	7.25083e-103
GPX4	9912.01	1.21979	0.0562174	21.6977	2.15699e-104	7.67569e-103
SDC4	14099	1.4375	0.0662963	21.683	2.96979e-104	1.0545e-102
ZCCHC2	1512.35	1.56418	0.0722379	21.6531	5.67723e-104	2.01147e-102
BNC2	3337.72	-1.39499	0.0644691	-21.6381	7.86298e-104	2.77984e-102
XRCC4	533.188	-2.44047	0.112805	-21.6344	8.52827e-104	3.00852e-102
EPHX1	5574.54	1.061	0.0490479	21.632	8.98612e-104	3.16319e-102
ST5	12637.6	-1.19307	0.0551637	-21.6278	9.83489e-104	3.45451e-102
KLHL5	5203.73	-1.06532	0.049259	-21.6269	1.00196e-103	3.51182e-102
MAPK3	1312.64	-1.76306	0.0815373	-21.6227	1.09753e-103	3.83855e-102
QPRT	375.934	-3.23829	0.149938	-21.5976	1.89282e-103	6.60581e-102
XBP1	6334.55	-1.21038	0.0561608	-21.552	5.076e-103	1.76771e-101
RANGAP1	4839.3	1.17577	0.0546856	21.5006	1.5384e-102	5.34602e-101
PPP1R14C	2094.78	1.34127	0.0623998	21.4949	1.73952e-102	6.03205e-101
C14orf37	6452.26	1.37368	0.0639239	21.4893	1.95969e-102	6.78112e-101
DSE	3912.97	-1.35024	0.0628499	-21.4836	2.21739e-102	7.65657e-101
PCOLCE	2144.06	-1.55453	0.0724454	-21.458	3.84784e-102	1.32584e-100
OLFML2B	725.802	-2.26256	0.105565	-21.4329	6.58932e-102	2.26567e-100
CYR61	29669.9	1.10823	0.0517107	21.4313	6.82285e-102	2.34103e-100
LPHN2	12262.9	1.10711	0.0516606	21.4303	6.96715e-102	2.38552e-100
2022-09-08	5692.1	-1.13407	0.0530343	-21.3837	1.89321e-101	6.46868e-100
GTF3C6	1377.73	-1.74487	0.0816135	-21.3796	2.0685e-101	7.0528e-100
RUSC2	7963.65	-1.06127	0.049692	-21.357	3.35347e-101	1.14102e-99
HIVEP3	3081.66	1.74333	0.0816785	21.3438	4.45524e-101	1.51274e-99
PSPH	1717.82	-1.45857	0.0683836	-21.3292	6.07858e-101	2.05964e-99
KANK4	262.367	-4.57532	0.214611	-21.3191	7.55377e-101	2.55418e-99
CALM1	31158.7	0.95286	0.0447306	21.3022	1.08293e-100	3.65417e-99
FARP2	4675.19	1.28259	0.0602205	21.2982	1.1801e-100	3.97382e-99
HS2ST1	15875.4	1.40765	0.0661049	21.2941	1.28696e-100	4.31582e-99
ZNF37A	2549.76	-1.32706	0.0623202	-21.2942	1.28452e-100	4.31582e-99
C6orf48	5916.32	-1.21883	0.0572691	-21.2824	1.65145e-100	5.52675e-99
TTYH3	16543.9	1.18647	0.0557781	21.2712	2.09759e-100	7.00543e-99
NR2F1	4735.81	1.34021	0.0630984	21.24	4.07612e-100	1.35854e-98
ARHGAP24	377.504	-2.84585	0.134117	-21.2191	6.36416e-100	2.1168e-98
DAB1	668.197	2.00803	0.0946536	21.2145	7.01901e-100	2.32986e-98
SLAIN1	1076.3	1.64366	0.0774867	21.2121	7.37853e-100	2.44421e-98
SLC25A43	394.492	-2.61601	0.123429	-21.1945	1.07405e-99	3.5507e-98
S1PR3	713.986	2.26316	0.1068	21.1907	1.16465e-99	3.84242e-98
FAS	1082.61	-1.90682	0.0901547	-21.1505	2.72931e-99	8.98631e-98
CLCF1	1200.63	1.74745	0.0826507	21.1426	3.22518e-99	1.05976e-97
PLEKHG1	14400.3	1.11547	0.0529214	21.0778	1.27264e-98	4.17335e-97
SHMT2	5450.11	-1.05345	0.0500267	-21.0578	1.94032e-98	6.35006e-97
SYNE2	4991.99	1.73924	0.0826004	21.0561	2.01011e-98	6.5653e-97
INHBE	423.357	-7.11394	0.337954	-21.05	2.28484e-98	7.44766e-97
SPARC	508670	-1.55124	0.0738237	-21.0127	5.01861e-98	1.6326e-96
FAM65B	1786.41	1.54106	0.0733419	21.012	5.09021e-98	1.65259e-96
BTN3A3	552.929	-2.42778	0.115582	-21.0049	5.9143e-98	1.91633e-96
CHPF2	10603.6	1.10696	0.052744	20.9875	8.53181e-98	2.75896e-96
LGR4	17818.8	-1.23079	0.0586676	-20.979	1.02036e-97	3.29305e-96
CDH2	113948	1.21251	0.057837	20.9642	1.39225e-97	4.48436e-96
WWC2	8890.97	1.01329	0.0483363	20.9634	1.41717e-97	4.55563e-96
FBLN1	3267.84	-1.29115	0.0616953	-20.9278	2.98838e-97	9.58751e-96
TMEM50B	3497.13	1.36121	0.0651016	20.9091	4.42814e-97	1.41787e-95
TGM2	2975.65	-1.33895	0.0640703	-20.8981	5.57553e-97	1.78176e-95
ANP32B	5088.58	-1.37311	0.0657585	-20.8811	7.95538e-97	2.53731e-95
CAPN1	3719.66	-1.24585	0.0596957	-20.8699	1.00446e-96	3.1974e-95
UBE2L6	1296.83	-1.55837	0.074672	-20.8696	1.01201e-96	3.21515e-95
MAP3K7CL	261.979	-3.7285	0.178716	-20.8628	1.16735e-96	3.70146e-95
NTN4	1308.43	-1.80719	0.0866256	-20.8621	1.18274e-96	3.74296e-95
CMBL	1144.82	-1.755	0.0842096	-20.8409	1.84421e-96	5.82497e-95
MAP1A	36492.1	-1.31023	0.0629752	-20.8054	3.86462e-96	1.21829e-94
GDPD5	1928.81	1.42756	0.0686324	20.8001	4.32054e-96	1.35938e-94
FKBP9	16691.7	-1.26191	0.060734	-20.7777	6.88546e-96	2.16222e-94
GFOD1	1692.85	1.51034	0.0729551	20.7024	3.29776e-95	1.03359e-93
CA10	605.733	-2.36238	0.114133	-20.6985	3.57095e-95	1.11707e-93
TXNDC15	2437.05	-1.34559	0.0650971	-20.6705	6.39153e-95	1.99558e-93
ATP1B3	7293.48	1.04725	0.0506762	20.6656	7.06608e-95	2.20197e-93
P2RX6	243.279	-4.23874	0.205188	-20.6578	8.30684e-95	2.58368e-93
DAP	27597	0.990924	0.0479737	20.6556	8.70119e-95	2.70118e-93
LRPAP1	10262.8	1.00713	0.0487757	20.6481	1.01454e-94	3.14355e-93
DDX60	403.227	-2.52792	0.122445	-20.6453	1.07596e-94	3.32752e-93
B4GALT5	11000	1.08944	0.0527722	20.6443	1.09935e-94	3.39341e-93
MAN1C1	3769.13	1.27518	0.061805	20.6323	1.4069e-94	4.33454e-93
FTL	109275	1.27459	0.061797	20.6254	1.62302e-94	4.99095e-93
TMTC2	1263.99	1.5703	0.0762039	20.6065	2.39814e-94	7.36063e-93
MTMR2	3541.61	-1.11712	0.0542416	-20.5952	3.02854e-94	9.27803e-93
B3GAT3	3249.77	1.13832	0.0552819	20.5912	3.29423e-94	1.00731e-92
ZYG11B	5701.65	1.19371	0.0580728	20.5554	6.89028e-94	2.10295e-92
MICAL2	22643.9	-1.34734	0.0655807	-20.5448	8.56483e-94	2.60915e-92
STRIP2	1653.57	1.61855	0.0787975	20.5406	9.34371e-94	2.84111e-92
ALPK2	11681.7	-1.02825	0.0500997	-20.5241	1.31181e-93	3.98134e-92
FKBP10	28386.6	-1.15008	0.056112	-20.4962	2.32922e-93	7.05606e-92
DYNLL2	16526	1.19136	0.0581516	20.4871	2.80647e-93	8.48605e-92
IFI44	340.114	-2.81832	0.137579	-20.4852	2.91948e-93	8.81142e-92
NDUFA4L2	728.304	-1.88449	0.0920046	-20.4826	3.07774e-93	9.27191e-92
MAPRE2	8052.06	1.02508	0.0500581	20.4778	3.39877e-93	1.02201e-91
GBP2	660.736	-1.97715	0.0965621	-20.4754	3.56636e-93	1.07043e-91
CFLAR	3364.09	-1.13354	0.0553646	-20.474	3.66938e-93	1.09933e-91
CPQ	1603.46	-1.48133	0.072453	-20.4454	6.60412e-93	1.97493e-91
GGH	1618.76	1.65392	0.0809385	20.4342	8.29576e-93	2.47627e-91
FOCAD	4432.44	1.2496	0.0611763	20.4262	9.78017e-93	2.91403e-91
AKAP13	13648.5	1.20717	0.0591234	20.4179	1.16014e-92	3.45037e-91
NNMT	8939.08	-1.15356	0.0565357	-20.4041	1.53912e-92	4.56914e-91
CHKA	1958.93	1.41562	0.0694055	20.3964	1.80036e-92	5.33494e-91
MARS	10784	-1.00268	0.0491614	-20.3956	1.83004e-92	5.41306e-91
HOXB3	8525.7	1.28352	0.0630019	20.3728	2.91661e-92	8.61139e-91
ADAMTSL1	923.719	-1.85201	0.0909816	-20.3558	4.12089e-92	1.21451e-90
CORO1C	20177.8	0.956868	0.0470146	20.3526	4.40334e-92	1.29541e-90
TSPAN3	13239.8	0.982088	0.0483155	20.3266	7.48526e-92	2.1981e-90
PLIN2	515.153	-2.22714	0.109651	-20.3112	1.02346e-91	3.00007e-90
EHD2	12585.4	-1.06435	0.0524282	-20.3011	1.25836e-91	3.68199e-90
TBC1D16	10520.6	0.999598	0.0492819	20.2833	1.80726e-91	5.27863e-90
FMNL2	14939.7	0.946216	0.0466573	20.2802	1.92515e-91	5.6129e-90
ISLR	343.921	-3.47849	0.171955	-20.2291	5.43138e-91	1.58073e-89
TGFB2	20344.3	-1.09646	0.0542186	-20.2229	6.15046e-91	1.78681e-89
GPR137C	933.252	1.84824	0.0915018	20.1989	1.00106e-90	2.90306e-89
RGS3	3804.83	-1.1027	0.0546038	-20.1945	1.09453e-90	3.1685e-89
TOMM34	2453.3	1.26115	0.0624553	20.1929	1.1301e-90	3.26568e-89
TRIM56	1708.37	-1.36815	0.0677879	-20.1828	1.38804e-90	4.00393e-89
DBN1	32140	1.07594	0.0534482	20.1305	3.99152e-90	1.14936e-88
VASN	5935.35	1.1589	0.0575734	20.1291	4.10483e-90	1.1799e-88
KIAA0368	6495.61	-1.07122	0.0532261	-20.1257	4.39143e-90	1.26006e-88
LTBP2	7226.7	-1.38589	0.0688683	-20.1238	4.56558e-90	1.30773e-88
MAN2A1	12952.7	1.18225	0.058768	20.1173	5.2057e-90	1.48847e-88
ARSI	258.319	-3.51966	0.174985	-20.1141	5.5516e-90	1.58459e-88
GLIS3	6834.51	1.17883	0.0586303	20.1062	6.51901e-90	1.85746e-88
DLG1	22311.6	-1.119	0.0557055	-20.0878	9.43716e-90	2.68424e-88
PALM	5267.69	-1.12106	0.0558162	-20.0849	1.00095e-89	2.84207e-88
FKBP8	7173.05	-0.956515	0.0477039	-20.0511	1.97524e-89	5.59869e-88
TAP2	1605.06	-1.47478	0.0736447	-20.0257	3.29185e-89	9.31432e-88
PDZD8	8018.09	1.14759	0.0573096	20.0244	3.3733e-89	9.52826e-88
LAMC1	125154	1.30276	0.065087	20.0157	4.01582e-89	1.13235e-87
DLX2	804.352	1.90424	0.0951529	20.0124	4.29103e-89	1.20786e-87
FLNC	102828	1.25413	0.0626794	20.0087	4.6257e-89	1.29982e-87
LOXL2	52264.8	-1.1132	0.055711	-19.9816	7.96007e-89	2.23293e-87
MYBL1	893.87	-1.68777	0.0844804	-19.9783	8.51188e-89	2.38362e-87
RAB11FIP3	4479.44	1.04827	0.0525365	19.9532	1.40598e-88	3.93046e-87
IL17RD	8100.25	1.18349	0.0593201	19.9509	1.47359e-88	4.11243e-87
TAGLN2	16552.7	1.01413	0.05085	19.9435	1.70577e-88	4.75224e-87
SFRP4	3237.35	-1.43819	0.0721409	-19.9359	1.98889e-88	5.53157e-87
MTA3	1797.22	-1.39659	0.0700989	-19.9232	2.56039e-88	7.1089e-87
PPP1R13B	1592.59	1.37561	0.0690517	19.9214	2.65566e-88	7.36088e-87
EIF4EBP1	2485.05	-1.37709	0.0691978	-19.9008	4.00636e-88	1.10859e-86
TMEM132A	17967.8	1.12441	0.0565083	19.8981	4.2259e-88	1.16735e-86
PTPRE	5482.52	1.2917	0.0649359	19.892	4.77525e-88	1.31687e-86
ARHGAP26	1101.69	1.55595	0.0783794	19.8515	1.06887e-87	2.94264e-86
KAL1	10303.9	1.26752	0.0638637	19.8473	1.1637e-87	3.19831e-86
CASP4	295.357	-2.9144	0.146849	-19.8463	1.186e-87	3.2541e-86
HAS2	230.308	-3.76798	0.19008	-19.8231	1.88102e-87	5.1524e-86
KLHL8	2273.35	1.27009	0.0641092	19.8113	2.37912e-87	6.50587e-86
TMEM159	1310.03	-1.45225	0.0733229	-19.8062	2.63096e-87	7.18249e-86
ZNF621	2391.25	-1.20053	0.0606337	-19.7997	2.99573e-87	8.16461e-86
GLT8D2	397.93	-2.54223	0.12851	-19.7823	4.22814e-87	1.15042e-85
LYPD6	966.627	1.6857	0.0852892	19.7645	6.02065e-87	1.63541e-85
SPATA18	426.814	-2.36077	0.119589	-19.7406	9.65356e-87	2.61786e-85
TP53I11	1799.73	-1.36837	0.0693323	-19.7364	1.05043e-86	2.84384e-85
NFATC4	486.52	-7.83096	0.396926	-19.729	1.21481e-86	3.2834e-85
ZHX2	1026.97	-1.96454	0.0997139	-19.7017	2.0837e-86	5.62254e-85
ACSL1	3247.11	1.10278	0.0560129	19.6879	2.73782e-86	7.37538e-85
DDIT3	2308.84	-1.24958	0.0634856	-19.6829	3.02157e-86	8.12634e-85
PRDX5	5674.43	-0.988468	0.0502298	-19.6789	3.27022e-86	8.78058e-85
PCYOX1	17086.9	1.10388	0.0561179	19.6707	3.8407e-86	1.02954e-84
SBNO1	8807.27	1.00318	0.050999	19.6706	3.85449e-86	1.03153e-84
KIAA1217	5638.82	-1.11697	0.0568075	-19.6623	4.53875e-86	1.21266e-84
IGF1	337.297	-3.22059	0.163845	-19.6564	5.09634e-86	1.35941e-84
RHOJ	1361.33	-1.59857	0.0814298	-19.6312	8.36871e-86	2.22865e-84
ING1	1413.91	1.56163	0.0797516	19.5812	2.23879e-85	5.95233e-84
CD68	1441.42	1.48806	0.0760293	19.5722	2.66666e-85	7.07838e-84
FMN2	755.152	1.84814	0.094454	19.5666	2.98013e-85	7.89757e-84
MAPK8IP1	4116.49	1.0846	0.0555119	19.5382	5.20065e-85	1.37598e-83
SCN4B	335.784	-2.83087	0.144915	-19.5347	5.56468e-85	1.46991e-83
CNTLN	547.773	-2.41545	0.12377	-19.5156	8.09335e-85	2.13439e-83
MATN3	525.762	-2.44071	0.125078	-19.5135	8.43137e-85	2.21994e-83
TM7SF2	1344.44	1.42536	0.0730582	19.51	9.03386e-85	2.37474e-83
ACOT2	383.304	-2.47638	0.126966	-19.5043	1.01006e-84	2.65087e-83
EXD2	1642.13	-1.40611	0.0721106	-19.4994	1.1106e-84	2.91005e-83
CSRNP2	7425	0.977061	0.0501303	19.4904	1.32333e-84	3.46189e-83
C3orf52	569.698	1.99332	0.102352	19.4752	1.78126e-84	4.65239e-83
LPIN3	218.957	-3.79996	0.195141	-19.4729	1.86465e-84	4.86242e-83
COMT	3483.67	-1.11044	0.0570387	-19.4681	2.04652e-84	5.32815e-83
PLCH1	393.671	-2.33552	0.120068	-19.4516	2.82384e-84	7.34019e-83
PAG1	5204.96	1.10484	0.0568462	19.4357	3.85447e-84	1.00032e-82
PLEKHA4	1010.29	-1.95703	0.100751	-19.4245	4.79343e-84	1.24202e-82
NMI	353.798	-2.69129	0.138718	-19.4012	7.54097e-84	1.95084e-82
HAX1	2829.55	-1.10927	0.0571987	-19.3932	8.81046e-84	2.27564e-82
SLC2A10	994.464	-1.76952	0.0912962	-19.3822	1.09139e-83	2.81448e-82
PNPLA2	3398.79	1.26724	0.0654048	19.3754	1.24476e-83	3.20492e-82
NT5DC3	5732.2	1.06501	0.0550352	19.3514	1.98559e-83	5.10429e-82
LRP1	97339.2	-1.24348	0.0643161	-19.3338	2.78967e-83	7.16001e-82
SH3YL1	954.078	-1.60742	0.0831433	-19.3332	2.82381e-83	7.23624e-82
PTPRG	14548.6	1.09873	0.0568402	19.3302	2.99502e-83	7.66293e-82
CDKN1A	38706.2	-0.991348	0.051321	-19.3166	3.8928e-83	9.94434e-82
LRRN1	4279.36	1.10734	0.057384	19.297	5.69681e-83	1.453e-81
ITGA5	18669.9	-1.19274	0.0618305	-19.2904	6.46821e-83	1.64717e-81
B3GNT2	1416.94	1.47964	0.0767065	19.2896	6.56796e-83	1.66996e-81
FHOD3	7311.85	1.01117	0.0524725	19.2705	9.495e-83	2.41043e-81
AUTS2	11808.7	1.06741	0.0554057	19.2653	1.04953e-82	2.66024e-81
GPN1	4997.46	1.09332	0.0567555	19.2637	1.08367e-82	2.74249e-81
SAMHD1	2159.01	1.28999	0.0669811	19.2591	1.18471e-82	2.99356e-81
FABP5	2176.51	1.25504	0.0651682	19.2585	1.19738e-82	3.02088e-81
THBS3	4582.75	-1.06313	0.0552396	-19.2457	1.5328e-82	3.86115e-81
FBXO21	5266.47	0.994001	0.0517153	19.2206	2.48654e-82	6.25395e-81
ALPK1	711.958	-1.89638	0.0986781	-19.2178	2.62602e-82	6.59458e-81
IFIT2	226.67	-3.46102	0.180116	-19.2155	2.74733e-82	6.88861e-81
TMEM154	499.408	-2.22053	0.115594	-19.2097	3.07089e-82	7.68807e-81
PTPRA	8787.6	0.929898	0.0484095	19.209	3.11085e-82	7.77617e-81
UNC13B	8085.57	0.959357	0.0500117	19.1827	5.16598e-82	1.28936e-80
RIMS3	2636.33	-1.2926	0.0674504	-19.1637	7.44314e-82	1.85203e-80
SNCG	353.423	-2.89977	0.151316	-19.1637	7.43736e-82	1.85203e-80
RHOD	384.99	-2.56046	0.133626	-19.1614	7.7703e-82	1.93049e-80
ALDH3A2	3104.53	1.06155	0.0554212	19.1541	8.94263e-82	2.21837e-80
FAM101A	593.298	-2.2122	0.115599	-19.1369	1.24499e-81	3.08372e-80
KLF11	1199.33	-1.44123	0.0753797	-19.1196	1.73286e-81	4.2856e-80
CLN3	545.688	-1.92536	0.100701	-19.1195	1.7375e-81	4.29058e-80
ULBP1	1779.28	-1.45508	0.0762521	-19.0825	3.53078e-81	8.70569e-80
DOCK4	1304.68	1.38935	0.0728353	19.0753	4.05197e-81	9.97567e-80
PLXND1	23034.1	1.1081	0.0581309	19.0621	5.21347e-81	1.28159e-79
ARHGEF2	8921.49	-0.936458	0.0491532	-19.0518	6.34665e-81	1.5578e-79
RIN2	770.304	-1.91647	0.100627	-19.0454	7.17885e-81	1.75941e-79
SLC38A5	276.798	-6.41195	0.337613	-18.992	1.98616e-80	4.86042e-79
PROCR	305.356	-2.72921	0.143789	-18.9807	2.46479e-80	6.02267e-79
MFI2	605.937	-1.98982	0.104887	-18.9711	2.95844e-80	7.21807e-79
GTPBP2	5281.43	-1.22205	0.0644276	-18.9679	3.14508e-80	7.66197e-79
JPH2	342.105	-2.551	0.134567	-18.9571	3.86098e-80	9.39197e-79
C10orf54	213.031	-3.92059	0.206956	-18.9441	4.94241e-80	1.20047e-78
DGKI	5333.54	1.32123	0.0697537	18.9413	5.20462e-80	1.26227e-78
NHSL1	1469.49	-1.31471	0.0694182	-18.9389	5.45048e-80	1.31994e-78
PHF11	587.818	-2.08474	0.110209	-18.9163	8.37509e-80	2.02518e-78
MEGF11	2084.82	1.36156	0.0719813	18.9155	8.4996e-80	2.05224e-78
ROR2	222.963	-3.79514	0.200767	-18.9032	1.07266e-79	2.58613e-78
ADAMTS1	754.125	-1.85895	0.098349	-18.9016	1.10712e-79	2.66527e-78
FAM83H	602.696	-2.10267	0.11126	-18.8987	1.16971e-79	2.8118e-78
GCLM	2794.73	-1.31635	0.0696818	-18.8909	1.35491e-79	3.25218e-78
SIRPA	3650.52	-1.07731	0.0570395	-18.8871	1.45673e-79	3.49143e-78
C1RL	1278.54	-1.38017	0.0731372	-18.8709	1.97735e-79	4.73228e-78
LMCD1	9615.47	-0.98169	0.0520423	-18.8633	2.28537e-79	5.46142e-78
HIST1H1C	596.576	1.8524	0.0982884	18.8466	3.13554e-79	7.48214e-78
PDE6D	1922.9	1.21998	0.0648531	18.8114	6.0949e-79	1.45226e-77
MDFIC	1234.34	-1.48274	0.0788245	-18.8106	6.1804e-79	1.47048e-77
HSD17B14	217.918	-3.51356	0.18693	-18.7961	8.12814e-79	1.93108e-77
TENC1	963.84	-1.80277	0.095963	-18.786	9.82376e-79	2.33053e-77
DNALI1	345.334	-2.45351	0.130635	-18.7814	1.07174e-78	2.53884e-77
COL10A1	222.401	-4.4075	0.234737	-18.7763	1.18024e-78	2.7918e-77
BRI3BP	1952.88	1.24817	0.0665317	18.7605	1.58817e-78	3.75131e-77
SERTAD1	1254.5	1.45012	0.0773402	18.7499	1.93938e-78	4.57424e-77
HAPLN1	202.339	-3.95291	0.211001	-18.7341	2.61259e-78	6.15318e-77
RASSF2	1157.72	-1.64053	0.0875847	-18.7308	2.77929e-78	6.53635e-77
IDH3A	2176.67	1.2675	0.0677336	18.713	3.8822e-78	9.11702e-77
SLC16A2	5458.37	1.02954	0.0550689	18.6956	5.37996e-78	1.26162e-76
ABI3BP	272.297	-2.97731	0.159644	-18.6497	1.27077e-77	2.97572e-76
CHRM4	259.013	3.06919	0.164618	18.6443	1.4053e-77	3.28603e-76
PODXL	1423.19	1.33825	0.0718585	18.6233	2.07858e-77	4.84646e-76
SEMA4F	3648.18	1.11753	0.0600069	18.6233	2.07807e-77	4.84646e-76
CACNA1H	2210.84	-1.21686	0.0655003	-18.5779	4.84913e-77	1.12902e-75
PLP1	425.401	-2.38867	0.128586	-18.5765	4.98373e-77	1.1587e-75
ST6GAL2	3532	-1.32577	0.0713745	-18.5749	5.13168e-77	1.1914e-75
HHAT	1782.92	-1.25832	0.0677727	-18.5668	5.96952e-77	1.38394e-75
C21orf62	547.68	-2.36563	0.127523	-18.5506	8.06664e-77	1.86747e-75
LONP1	6372.44	-0.913511	0.049262	-18.5439	9.12813e-77	2.11022e-75
KIAA0319L	9588.94	0.934488	0.050412	18.537	1.03812e-76	2.39649e-75
TBC1D8B	820.341	-1.68215	0.0908073	-18.5244	1.31174e-76	3.02388e-75
BACE2	6879.34	-1.03385	0.0558619	-18.5073	1.80363e-76	4.15192e-75
CA12	1928.55	-1.22515	0.0662049	-18.5054	1.8689e-76	4.29609e-75
ENSA	10729.1	1.01594	0.0549219	18.4978	2.14914e-76	4.93334e-75
OBSCN	916.907	-1.59308	0.086168	-18.4881	2.5763e-76	5.90557e-75
NCAM1	17258	0.862324	0.0466839	18.4716	3.49797e-76	8.007e-75
MZT2A	346.872	-2.47932	0.13439	-18.4487	5.34257e-76	1.22122e-74
TOMM40L	565.563	-1.98094	0.10739	-18.4463	5.58027e-76	1.27377e-74
CYB561	598.92	-1.7764	0.0963426	-18.4384	6.46565e-76	1.47381e-74
METTL21B	384.042	-2.52294	0.136906	-18.4283	7.79545e-76	1.77444e-74
CNTN1	7409.58	0.98438	0.0534258	18.4252	8.25445e-76	1.8763e-74
NUAK2	891.487	1.58275	0.0859116	18.423	8.58869e-76	1.94956e-74
TNFRSF21	2380.68	1.18409	0.0642804	18.4207	8.96767e-76	2.03276e-74
OLFML3	204.673	-3.988	0.216607	-18.4113	1.06709e-75	2.41548e-74
CPD	31314.8	1.06299	0.0577685	18.4008	1.2946e-75	2.92641e-74
TXNRD1	14889.7	0.960921	0.0522232	18.4003	1.30731e-75	2.95105e-74
ANTXR2	6551.92	1.02656	0.055799	18.3974	1.37818e-75	3.10673e-74
SUN1	9758.33	0.991715	0.0539708	18.375	2.08168e-75	4.68607e-74
TGFB1I1	3044.95	-1.21739	0.0663267	-18.3544	3.04512e-75	6.84543e-74
ECM2	193.933	-5.05395	0.275693	-18.3318	4.6122e-75	1.03539e-73
APMAP	12195.7	0.979465	0.0534333	18.3306	4.71644e-75	1.05734e-73
SLC43A2	11655	0.913915	0.0498766	18.3235	5.37129e-75	1.20249e-73
PDLIM4	5577.95	0.920821	0.0502973	18.3076	7.20361e-75	1.61049e-73
JUN	18051.7	0.923168	0.0504264	18.3072	7.24742e-75	1.61806e-73
SOX11	14124.3	1.3585	0.0742357	18.2998	8.30525e-75	1.8517e-73
RBM43	601.624	-1.93864	0.105991	-18.2907	9.82297e-75	2.18709e-73
IGF2BP3	2347.63	-1.10627	0.0604867	-18.2895	1.00244e-74	2.22889e-73
SAMD4A	7867.42	0.881534	0.0482373	18.275	1.30999e-74	2.90874e-73
KIAA1644	477.506	-2.33791	0.12804	-18.2593	1.74522e-74	3.86987e-73
ATP6V0A1	8161.59	0.910151	0.0498594	18.2543	1.91146e-74	4.23273e-73
SYT2	875.175	-2.09532	0.114791	-18.2534	1.94413e-74	4.29343e-73
TCF4	8751.72	-1.13124	0.0619741	-18.2534	1.94376e-74	4.29343e-73
BAALC	1069.75	-1.58544	0.0869009	-18.2442	2.30014e-74	5.07276e-73
INTU	1356.88	-1.30365	0.0715117	-18.2299	2.99102e-74	6.58752e-73
ABCA7	1798.55	1.4576	0.0800368	18.2116	4.17803e-74	9.18942e-73
ASS1	3473.03	-1.22096	0.067062	-18.2064	4.58945e-74	1.00807e-72
TMEM201	2090.28	1.15831	0.0636543	18.1969	5.4608e-74	1.19785e-72
FAIM2	561.624	-2.04273	0.112295	-18.1908	6.10866e-74	1.33816e-72
MLPH	298.841	-2.58013	0.142049	-18.1636	1.00228e-73	2.19263e-72
UXS1	4268.92	1.39194	0.0766387	18.1624	1.02452e-73	2.23829e-72
ATP11A	4360.3	1.11897	0.0616221	18.1586	1.09734e-73	2.39417e-72
ATL3	5602.2	-1.17197	0.0646213	-18.136	1.65508e-73	3.60621e-72
SLC44A1	6216.39	1.22242	0.0674412	18.1257	1.99944e-73	4.35072e-72
SNN	5026.18	1.0273	0.0567171	18.1128	2.52798e-73	5.49347e-72
FKBP5	4068.73	1.04628	0.0577897	18.1049	2.91582e-73	6.32784e-72
SUN2	13193	0.937404	0.051813	18.0921	3.68104e-73	7.97788e-72
IGFBP6	343.697	-2.39142	0.132211	-18.0879	3.97071e-73	8.59423e-72
NAV2	3608.36	-1.10437	0.0610897	-18.0778	4.76678e-73	1.03036e-71
FZD8	1285.86	1.44678	0.0800386	18.0761	4.91678e-73	1.06137e-71
EDA2R	2661.84	-1.24429	0.0688397	-18.0752	4.99872e-73	1.07763e-71
DUSP4	6203.9	1.02121	0.0565233	18.067	5.8002e-73	1.24877e-71
APBA1	3575.96	1.09113	0.0604062	18.0633	6.20402e-73	1.33395e-71
IFITM2	439.969	-2.10331	0.11645	-18.0618	6.36703e-73	1.36719e-71
JAZF1	1395.21	-1.54645	0.0856544	-18.0545	7.26687e-73	1.55836e-71
ABCC4	1225.68	-1.51351	0.0839074	-18.0378	9.8308e-73	2.10542e-71
PRR5L	1250.51	-1.35775	0.0753062	-18.0297	1.13947e-72	2.43715e-71
CLSPN	268.513	2.79187	0.155271	17.9806	2.76418e-72	5.90441e-71
POU3F3	7158.29	1.08057	0.0601086	17.977	2.94843e-72	6.28973e-71
INPP4B	1579.81	-1.21707	0.0677123	-17.9741	3.11014e-72	6.62602e-71
SH3PXD2B	13692	0.91483	0.0509234	17.9648	3.67514e-72	7.81952e-71
SDC3	25684.9	-1.03126	0.057433	-17.9559	4.31524e-72	9.16946e-71
NRP2	50923.4	1.06569	0.059368	17.9506	4.75167e-72	1.00837e-70
TGFA	2772.85	-1.30284	0.0726402	-17.9355	6.22763e-72	1.31987e-70
CHCHD7	1685.13	1.17953	0.0657811	17.9312	6.73091e-72	1.42468e-70
ABLIM3	1484.67	-1.27997	0.0714442	-17.9157	8.90166e-72	1.8817e-70
HSPA1B	3420.2	1.52196	0.0849563	17.9146	9.06906e-72	1.9146e-70
BAZ1A	3356.72	1.1372	0.0634974	17.9094	9.96124e-72	2.10024e-70
PDGFB	354.952	-2.35365	0.131513	-17.8967	1.25155e-71	2.63538e-70
KIAA0513	3617.4	0.980812	0.0548062	17.896	1.26714e-71	2.66476e-70
GPT2	5440.07	-0.91589	0.0511945	-17.8904	1.40057e-71	2.94156e-70
KIAA1958	1898.36	1.20603	0.067416	17.8894	1.4275e-71	2.99427e-70
HS3ST3B1	6875.44	1.03258	0.0577561	17.8783	1.73912e-71	3.64321e-70
EIF2AK2	4939.07	-1.17944	0.0659859	-17.8741	1.87516e-71	3.92315e-70
C2CD2	483.075	-1.94864	0.109073	-17.8656	2.18755e-71	4.57085e-70
TP53INP2	5034.8	1.01125	0.0566062	17.8646	2.2252e-71	4.64358e-70
UBR3	6367.69	0.977219	0.0547086	17.8623	2.32028e-71	4.83579e-70
IGLON5	352.788	-2.40172	0.134556	-17.8492	2.93369e-71	6.10643e-70
POU6F1	443.115	-2.01985	0.113181	-17.8462	3.09597e-71	6.43599e-70
RCN3	1173.26	-1.41855	0.0795047	-17.8424	3.31223e-71	6.87678e-70
CARHSP1	3950.52	0.957235	0.0536659	17.8369	3.65284e-71	7.5743e-70
MARVELD2	292.144	-2.60591	0.146183	-17.8264	4.41176e-71	9.13633e-70
HDGF	7091	-1.04089	0.0584136	-17.8193	5.00715e-71	1.03562e-69
MAP3K9	3492.08	1.1445	0.0642578	17.8111	5.79567e-71	1.19718e-69
FCGRT	2345.71	-1.28303	0.0721251	-17.7889	8.60795e-71	1.77585e-69
STK32B	372.573	-2.1524	0.121028	-17.7843	9.34652e-71	1.92578e-69
MX1	279	-3.03921	0.170902	-17.7834	9.50637e-71	1.95625e-69
EFEMP2	8158.65	-0.866213	0.0487106	-17.7828	9.5999e-71	1.973e-69
TENM2	3503.97	-1.46211	0.0822335	-17.78	1.00947e-70	2.07208e-69
SORBS2	455.26	-1.93056	0.108672	-17.765	1.31861e-70	2.70323e-69
FZD7	4509.69	1.17719	0.0662869	17.759	1.46762e-70	3.00492e-69
MICAL3	7694.71	0.961907	0.0541749	17.7556	1.5604e-70	3.1909e-69
SAP30L	2626.45	1.04442	0.0588581	17.7447	1.89335e-70	3.86689e-69
F13A1	244.713	-2.85032	0.160781	-17.7279	2.5529e-70	5.20741e-69
PYGO2	3574.33	0.97898	0.0552444	17.7209	2.89239e-70	5.89253e-69
CDK18	279.372	-2.71599	0.153308	-17.7159	3.1586e-70	6.42683e-69
SLC12A2	4041.99	1.19022	0.0671975	17.7123	3.36858e-70	6.84554e-69
TMEM173	239.452	-2.95013	0.166561	-17.712	3.38572e-70	6.8718e-69
SCN2B	214.105	-3.20128	0.180836	-17.7026	4.00125e-70	8.11099e-69
USP11	8084.33	0.934751	0.0528089	17.7006	4.14519e-70	8.39233e-69
ADAMTS7	2194.35	1.1828	0.0668874	17.6834	5.63071e-70	1.13858e-68
CDON	3895.84	1.1261	0.06372	17.6726	6.81753e-70	1.37685e-68
FOXO1	3162.93	1.18947	0.067343	17.6629	8.09214e-70	1.63225e-68
HOPX	797.322	1.65826	0.0939021	17.6594	8.61385e-70	1.73534e-68
ILDR2	3338.38	1.05658	0.0598483	17.6543	9.42169e-70	1.89574e-68
DDX58	730.825	-1.59563	0.0903967	-17.6514	9.92864e-70	1.99528e-68
FOXS1	179.674	-4.16971	0.236291	-17.6465	1.08216e-69	2.17205e-68
CLTCL1	1728.73	-1.46777	0.0832388	-17.6332	1.37026e-69	2.74693e-68
ABHD12	2856.02	1.09622	0.0621763	17.6309	1.4268e-69	2.85675e-68
LARGE	4183.68	1.0946	0.0620932	17.6284	1.49186e-69	2.98335e-68
BMPR1B	1838.03	-1.48932	0.0845015	-17.6248	1.58997e-69	3.17565e-68
IFITM10	983.492	-1.51184	0.085823	-17.6158	1.86402e-69	3.71845e-68
INPP4A	4850.8	0.942223	0.0535297	17.6019	2.38271e-69	4.74736e-68
UFSP2	986.473	-1.41043	0.080137	-17.6003	2.45212e-69	4.87968e-68
C1QL4	491.494	1.93325	0.109904	17.5903	2.92371e-69	5.81106e-68
CCNYL1	2421.57	1.23588	0.0703004	17.58	3.5066e-69	6.96109e-68
CREB5	2938.04	1.01301	0.057644	17.5736	3.92753e-69	7.7872e-68
PCDH9	1166.71	1.54033	0.087661	17.5715	4.07602e-69	8.07181e-68
SERPINA5	324.702	-2.43443	0.138563	-17.5691	4.24747e-69	8.40112e-68
ZBTB7B	1585.7	-1.3019	0.0741471	-17.5584	5.13219e-69	1.01387e-67
CNNM4	1973.49	1.0979	0.0625532	17.5515	5.78875e-69	1.14219e-67
SEC16B	179.069	-3.63884	0.207463	-17.5397	7.13097e-69	1.40533e-67
SLC2A3	9882.11	0.910898	0.051944	17.5362	7.58983e-69	1.49395e-67
B3GNT9	338.515	-2.45161	0.139834	-17.5323	8.12856e-69	1.59806e-67
FAM129A	28168.6	-1.04308	0.05953	-17.5219	9.75483e-69	1.91547e-67
PDGFC	15084.4	-0.976488	0.055745	-17.517	1.06198e-68	2.08281e-67
NQO1	2234.56	-1.09306	0.0623999	-17.517	1.06357e-68	2.08342e-67
TOM1L2	13344.8	0.852042	0.048685	17.5011	1.40516e-68	2.74925e-67
THOC6	1219.98	1.74648	0.0998777	17.4862	1.82642e-68	3.56919e-67
GRIK2	1834.59	1.15556	0.0661503	17.4687	2.47897e-68	4.83859e-67
KIAA1324L	2622.42	1.0453	0.0598697	17.4595	2.91245e-68	5.67789e-67
HGSNAT	9099.59	0.91075	0.0521642	17.4593	2.92626e-68	5.69798e-67
TECR	3270.21	0.94439	0.0540914	17.4592	2.93194e-68	5.70224e-67
FOXG1	10595.4	1.05691	0.0605418	17.4576	3.01388e-68	5.85461e-67
ZNF365	819.624	-1.5681	0.0898905	-17.4446	3.78593e-68	7.34561e-67
EZR	11562.3	0.946563	0.0542658	17.4431	3.88485e-68	7.52858e-67
PCDH18	476.548	-1.91428	0.109798	-17.4346	4.50699e-68	8.72386e-67
SERPINB9	765.696	1.79091	0.10273	17.4331	4.62781e-68	8.9471e-67
KIFC3	1030.33	-1.44954	0.083174	-17.4278	5.07788e-68	9.8056e-67
CACFD1	1794.75	1.21646	0.0698102	17.4252	5.31223e-68	1.0246e-66
LMBR1	5101.43	1.06484	0.0611494	17.4137	6.49831e-68	1.25188e-66
OBSL1	2515.72	-1.078	0.0619236	-17.4086	7.10075e-68	1.36633e-66
WDR63	238.242	-2.77693	0.159589	-17.4005	8.17704e-68	1.57157e-66
NTS	285.474	-2.63864	0.151698	-17.394	9.15333e-68	1.75714e-66
IRGQ	5282.13	0.960662	0.0552545	17.3861	1.05089e-67	2.01498e-66
DIAPH3	552.877	-1.84696	0.106293	-17.3761	1.25283e-67	2.39938e-66
TPM4	102493	-0.923876	0.0531965	-17.3673	1.46054e-67	2.79389e-66
PDGFD	4342.9	1.17213	0.0675316	17.3567	1.75535e-67	3.35389e-66
CCPG1	23859.2	-1.24293	0.0716747	-17.3413	2.29452e-67	4.37893e-66
ELMO1	436.797	-1.99703	0.11518	-17.3383	2.4186e-67	4.61034e-66
AHR	7425.92	-1.07437	0.0619999	-17.3287	2.85931e-67	5.44405e-66
APCDD1L	261.984	-2.87473	0.166004	-17.3173	3.48621e-67	6.6299e-66
CHN1	1407.21	-1.36303	0.0787401	-17.3104	3.92351e-67	7.45284e-66
ITGB8	11940.3	1.39567	0.0806351	17.3084	4.06337e-67	7.70952e-66
PPP1R13L	622.508	-1.78247	0.102985	-17.3081	4.08391e-67	7.73949e-66
JUND	7563.12	1.13728	0.0657863	17.2874	5.84879e-67	1.10713e-65
RALY	6616.17	0.877016	0.0507565	17.2789	6.78453e-67	1.28276e-65
COMP	610.227	-2.1343	0.123591	-17.2691	8.04098e-67	1.51856e-65
C3orf18	496.818	-1.97548	0.114427	-17.2641	8.76058e-67	1.65255e-65
GDF6	472.74	-2.06855	0.119839	-17.261	9.24953e-67	1.74276e-65
PDCD1LG2	856.101	-1.68968	0.0978933	-17.2604	9.3411e-67	1.75798e-65
ZNF445	4126.28	0.901936	0.0522573	17.2595	9.48804e-67	1.78358e-65
SYT17	853.002	-1.46521	0.0848987	-17.2583	9.68411e-67	1.81834e-65
HPCAL1	1767.37	1.12415	0.065146	17.2559	1.01011e-66	1.89445e-65
PTMA	48162	1.25553	0.0727891	17.2488	1.14161e-66	2.13862e-65
MEIS3	2003.58	-1.15826	0.0671956	-17.2372	1.39662e-66	2.61333e-65
CA11	322.795	-2.64403	0.153425	-17.2334	1.49145e-66	2.78757e-65
TTBK1	1239.48	1.36015	0.0789337	17.2316	1.5385e-66	2.87223e-65
AGPAT6	8155.1	0.855182	0.0496424	17.2268	1.67023e-66	3.11458e-65
CFH	758.764	-1.70413	0.0989255	-17.2264	1.68386e-66	3.13641e-65
CHST3	14576.3	-0.98276	0.0570577	-17.224	1.75509e-66	3.26535e-65
TRH	2131.49	-1.44779	0.0840805	-17.2191	1.90773e-66	3.54528e-65
FXR2	5105.81	0.952398	0.055311	17.219	1.91404e-66	3.54893e-65
SORT1	26095.4	0.990771	0.0575395	17.219	1.91332e-66	3.54893e-65
CNN2	23181.7	-0.781432	0.0453885	-17.2165	1.99691e-66	3.69836e-65
MCPH1	797.988	-1.54511	0.0898207	-17.2021	2.55887e-66	4.73377e-65
CEP85	1310.21	1.20619	0.070146	17.1954	2.87598e-66	5.31436e-65
TACR1	386.495	-2.21617	0.129008	-17.1786	3.84279e-66	7.09285e-65
SPRY2	1948.01	1.07734	0.0627265	17.1752	4.07298e-66	7.50922e-65
BICC1	3899.1	-1.0532	0.0615419	-17.1136	1.1757e-65	2.16515e-64
CX3CL1	815.552	1.47543	0.086226	17.1111	1.22572e-65	2.25471e-64
PMEPA1	88070.2	0.920662	0.0538574	17.0944	1.63296e-65	3.00045e-64
HEY1	3465.8	1.04609	0.0612138	17.0892	1.78638e-65	3.27865e-64
GLI1	182.1	-5.60687	0.328289	-17.0791	2.12551e-65	3.89668e-64
SERPINF1	1131.32	-1.42417	0.08344	-17.0681	2.56195e-65	4.69154e-64
JAG1	18329.5	1.02281	0.0599592	17.0584	3.02798e-65	5.53873e-64
ACPL2	2875.97	1.17818	0.0690757	17.0563	3.13871e-65	5.73484e-64
RRAD	593.853	1.667	0.0977553	17.0528	3.33257e-65	6.08222e-64
ACTR3	19151.3	-0.806744	0.0474049	-17.0182	6.0237e-65	1.09815e-63
SDC2	18169.9	0.931604	0.0547553	17.014	6.46993e-65	1.17818e-63
ACTG1	328164	0.926921	0.0545456	16.9935	9.17141e-65	1.66826e-63
EXT2	16213.6	0.956053	0.0562841	16.9862	1.03905e-64	1.88791e-63
DDX60L	585.516	-1.75812	0.10352	-16.9834	1.09018e-64	1.97859e-63
TYRO3	792.463	-1.72116	0.101345	-16.9832	1.09268e-64	1.98093e-63
CCND1	8397.7	-1.29715	0.0764242	-16.973	1.30116e-64	2.35626e-63
ELOVL4	1862.53	1.17617	0.069383	16.9519	1.86349e-64	3.37082e-63
UBE2E1	2804.81	-1.25323	0.0739523	-16.9464	2.04487e-64	3.69482e-63
DENND1B	629.048	-1.62924	0.0961763	-16.9401	2.27679e-64	4.10932e-63
CCNF	636.993	1.68454	0.099449	16.9388	2.33004e-64	4.20078e-63
C9orf9	457.114	-1.92397	0.113652	-16.9286	2.76843e-64	4.98561e-63
HMGN2	21353.3	1.0256	0.0607294	16.888	5.51762e-64	9.92563e-63
LITAF	2200.78	-1.12442	0.0666095	-16.8807	6.23698e-64	1.12073e-62
TCEA1	8565.86	-1.12895	0.0669189	-16.8704	7.43007e-64	1.33365e-62
CD59	20828.2	0.885277	0.052495	16.864	8.27754e-64	1.48413e-62
GPRIN1	2357.22	1.13187	0.0671371	16.8591	8.99535e-64	1.61106e-62
IRF1	1304.68	-1.39147	0.0825518	-16.8558	9.51641e-64	1.70251e-62
ABHD4	4316.57	-0.903032	0.0536155	-16.8427	1.18623e-63	2.11987e-62
FZD3	4334.6	1.08231	0.0642799	16.8375	1.29664e-63	2.31463e-62
SLC18B1	371.875	-2.08724	0.124025	-16.8292	1.49207e-63	2.66059e-62
TUBB4B	8024.56	1.13684	0.0675534	16.8288	1.50129e-63	2.67411e-62
NEO1	8184.88	1.04685	0.0622063	16.8286	1.50503e-63	2.67783e-62
CLU	42806.5	0.963935	0.0572809	16.8282	1.51574e-63	2.69396e-62
LHFP	4544.18	0.955753	0.056812	16.8231	1.65328e-63	2.9352e-62
CHD1	3886.93	0.939905	0.0558887	16.8175	1.81791e-63	3.22397e-62
DMD	1996.99	-1.11131	0.0660961	-16.8135	1.9431e-63	3.44225e-62
NRXN3	1541.59	1.17151	0.0696777	16.8132	1.95316e-63	3.45631e-62
EIF4A3	3172.3	0.971334	0.0578301	16.7963	2.59597e-63	4.58884e-62
TRIM16	937.504	-1.36403	0.0812179	-16.7948	2.66624e-63	4.70795e-62
MLC1	165.448	-4.43	0.26392	-16.7854	3.12134e-63	5.50558e-62
PCYT2	2139.12	1.05806	0.0630589	16.779	3.47746e-63	6.1271e-62
MMP28	258.522	-2.52543	0.150522	-16.7778	3.54621e-63	6.24148e-62
MKL1	10403.2	0.873462	0.0520627	16.7771	3.58965e-63	6.31112e-62
IFI44L	161.046	-3.93058	0.234335	-16.7733	3.82396e-63	6.71582e-62
SLC25A4	3133.04	0.98118	0.0585172	16.7674	4.22727e-63	7.41615e-62
CAP2	2855.58	-0.961235	0.0573374	-16.7645	4.43443e-63	7.77121e-62
JDP2	1703.56	-1.40139	0.0836112	-16.7608	4.7202e-63	8.26314e-62
MLTK	2579.22	-1.13138	0.0675446	-16.7501	5.6554e-63	9.88968e-62
PAPSS2	915.771	-1.37541	0.0821626	-16.7401	6.68463e-63	1.1677e-61
PDIA4	23852.4	0.88973	0.0531966	16.7253	8.57315e-63	1.49599e-61
IGFL3	534.97	-1.74807	0.104551	-16.7197	9.41314e-63	1.64081e-61
PCDH7	2531.69	1.1252	0.0673313	16.7113	1.08382e-62	1.88718e-61
CDH8	4268.33	1.02687	0.0614531	16.7098	1.11211e-62	1.93438e-61
PLA2G15	3005.28	1.12856	0.0675747	16.701	1.28966e-62	2.24083e-61
HIST2H2BF	162.695	4.34481	0.260422	16.6837	1.72152e-62	2.98799e-61
IFIH1	152.505	-4.37928	0.262614	-16.6757	1.96846e-62	3.41297e-61
PHLDA3	4235.43	-0.967544	0.0580262	-16.6743	2.01698e-62	3.49338e-61
RABEP1	11269.7	0.843713	0.0506124	16.6701	2.16308e-62	3.74244e-61
C14orf159	746.806	-1.50701	0.0905204	-16.6483	3.11313e-62	5.38046e-61
MFHAS1	1771.03	1.07944	0.06486	16.6427	3.42018e-62	5.90488e-61
TLR3	178.97	-5.79149	0.348279	-16.6289	4.3065e-62	7.42723e-61
INADL	920.59	-1.35931	0.0818775	-16.6017	6.77342e-62	1.16695e-60
ENG	255.23	-2.64294	0.15925	-16.5962	7.42151e-62	1.27725e-60
MORN4	813.641	-1.4623	0.0881637	-16.5862	8.77323e-62	1.50829e-60
ADARB1	2020.46	1.10463	0.0666049	16.5847	8.98429e-62	1.54295e-60
PDK2	933.433	-1.3873	0.0836811	-16.5784	9.9819e-62	1.71247e-60
HSPA12A	8817.75	0.974995	0.0588336	16.5721	1.10959e-61	1.90159e-60
HAUS3	1069.03	1.4378	0.086767	16.5708	1.13334e-61	1.94025e-60
PRDM5	370.066	-1.98047	0.11952	-16.5703	1.14329e-61	1.95523e-60
SLC2A13	2303.34	1.20822	0.0729818	16.5551	1.47016e-61	2.5116e-60
CDH4	4751.71	1.0487	0.0633627	16.5507	1.58132e-61	2.69867e-60
PYGL	5683.64	-0.8545	0.0516603	-16.5408	1.86656e-61	3.18214e-60
ST6GALNAC6	1890.88	-1.02931	0.0622309	-16.5402	1.88384e-61	3.20824e-60
RBMS3	1252.29	-1.26517	0.0765192	-16.5341	2.08542e-61	3.54782e-60
H3F3A	4677.68	0.849222	0.0513851	16.5266	2.35968e-61	4.01023e-60
CKB	3495.65	1.25268	0.0758416	16.5171	2.76409e-61	4.69262e-60
DSTN	26674.9	-0.784453	0.0475091	-16.5116	3.0258e-61	5.13159e-60
FBXO17	410.867	-1.95718	0.11857	-16.5065	3.29244e-61	5.57798e-60
PON2	5697.32	-0.977869	0.0592841	-16.4946	4.00931e-61	6.78544e-60
LRRN4CL	184.724	-3.69283	0.223927	-16.4912	4.24406e-61	7.17527e-60
THBS1	173232	-0.984006	0.0596883	-16.4858	4.64476e-61	7.84459e-60
UNC93B1	423.719	-1.94039	0.117772	-16.4758	5.47506e-61	9.23733e-60
TEAD3	2300.83	-1.00422	0.0609835	-16.467	6.32915e-61	1.06673e-59
OXCT1	3132.43	-0.899235	0.0546245	-16.4621	6.86591e-61	1.156e-59
SECISBP2	3001.94	1.05337	0.063992	16.461	6.98941e-61	1.17558e-59
KCNG1	495.035	-1.69666	0.103089	-16.4582	7.32696e-61	1.23108e-59
BCAP31	7444.69	0.846349	0.051483	16.4394	9.99376e-61	1.67743e-59
PDLIM2	215.397	-2.73849	0.166636	-16.4339	1.09379e-60	1.83401e-59
SLC16A4	959.846	-1.45758	0.0886941	-16.4338	1.09589e-60	1.83565e-59
FAM84A	1015.97	1.42949	0.0870399	16.4233	1.30208e-60	2.17878e-59
EPB41L5	2220.2	1.03828	0.0632258	16.4217	1.33745e-60	2.23567e-59
PCED1B	233.327	-2.6794	0.163396	-16.3982	1.97033e-60	3.29022e-59
C5orf46	567.53	-1.83694	0.112066	-16.3916	2.1973e-60	3.66546e-59
HHIP	156.256	-5.15053	0.314243	-16.3903	2.24471e-60	3.74073e-59
UGP2	9775.24	-0.779724	0.0475778	-16.3884	2.31383e-60	3.85197e-59
FREM2	282.851	2.49872	0.152473	16.3879	2.33245e-60	3.879e-59
POU2F2	241.402	-2.79433	0.17055	-16.3842	2.47826e-60	4.1173e-59
PRKAB2	6816.75	-0.792639	0.0484015	-16.3763	2.8226e-60	4.6846e-59
SSFA2	7089.6	0.862716	0.0526851	16.375	2.88686e-60	4.78638e-59
FUT8	4671.56	1.11124	0.0679068	16.3641	3.44905e-60	5.71266e-59
NRCAM	23217.9	0.85954	0.0525315	16.3624	3.55062e-60	5.87492e-59
ARIH1	7988.61	0.809884	0.0495163	16.3559	3.94763e-60	6.5252e-59
CTSO	1369.91	-1.29185	0.0790084	-16.3508	4.29093e-60	7.08547e-59
C1R	1462.75	-1.54124	0.0942999	-16.3441	4.79489e-60	7.90963e-59
DGAT1	978.621	1.33255	0.081626	16.3251	6.54419e-60	1.07843e-58
CADM3	2896.87	1.0291	0.0630491	16.3222	6.86734e-60	1.13055e-58
CAMK1D	8435.3	-0.892104	0.054659	-16.3213	6.96798e-60	1.14596e-58
HTR2A	260.314	-2.42285	0.148468	-16.319	7.23005e-60	1.18786e-58
ATP6V0E2	3704.28	0.957721	0.0586989	16.3158	7.61892e-60	1.25049e-58
ENTPD4	11458	0.83429	0.051135	16.3155	7.66376e-60	1.25658e-58
DPP7	1882.2	-1.04066	0.0637865	-16.3148	7.74777e-60	1.26908e-58
FUCA1	3753.11	0.976572	0.0598613	16.3139	7.8589e-60	1.28599e-58
GABBR2	1267.59	-1.26844	0.0777594	-16.3124	8.05228e-60	1.31631e-58
XPR1	13469.9	0.881354	0.0540568	16.3042	9.20802e-60	1.50373e-58
AARS	12247.8	-0.78667	0.0482648	-16.299	1.00244e-59	1.63541e-58
AGBL5	1708.7	-1.12751	0.0691994	-16.2937	1.09424e-59	1.78338e-58
ITPR3	2450.06	-1.09149	0.0669963	-16.2918	1.12773e-59	1.83614e-58
CRABP2	310.916	-2.28227	0.140137	-16.286	1.24163e-59	2.01957e-58
CMSS1	1246.9	1.2052	0.0740041	16.2856	1.24942e-59	2.03021e-58
KCNC3	1231.49	1.40767	0.0864404	16.2848	1.26443e-59	2.05256e-58
TMEM170B	2509.87	1.26606	0.077781	16.2773	1.43019e-59	2.31932e-58
SLC7A8	307.599	-2.25306	0.138559	-16.2606	1.87747e-59	3.04164e-58
CARS	6295.97	-0.842161	0.0518159	-16.253	2.12849e-59	3.44491e-58
TNR	494.261	-2.18916	0.134765	-16.2442	2.45381e-59	3.96748e-58
ADAM23	2139.92	1.00729	0.0620688	16.2286	3.16361e-59	5.11006e-58
TLN2	12719.7	1.03013	0.0635048	16.2214	3.56118e-59	5.74654e-58
KIAA0754	4963.28	1.25803	0.0776551	16.2002	5.0267e-59	8.10338e-58
CCDC85B	1272.65	1.25106	0.0772356	16.198	5.20849e-59	8.38815e-58
RALGAPA2	2401.89	0.993896	0.0613734	16.1942	5.53801e-59	8.91002e-58
FAM13A	1040.05	-1.24128	0.076697	-16.1842	6.51545e-59	1.04723e-57
KIAA1683	215.21	2.84385	0.175811	16.1756	7.49688e-59	1.20379e-57
VEPH1	151.312	-3.94716	0.244293	-16.1575	1.00621e-58	1.6141e-57
MNS1	290.613	-2.38747	0.147853	-16.1476	1.18115e-58	1.89285e-57
CERS4	930.44	-1.29543	0.0802767	-16.137	1.40123e-58	2.24334e-57
VASP	6594.57	-0.97044	0.0601603	-16.1309	1.54742e-58	2.47496e-57
CSDC2	678.655	-1.60451	0.0995127	-16.1237	1.7395e-58	2.77945e-57
NUCB2	2454.11	-1.25795	0.0780342	-16.1204	1.83293e-58	2.92587e-57
HSPA9	18797.4	-0.809218	0.0502423	-16.1063	2.30441e-58	3.67489e-57
ROBO1	15527.7	0.874208	0.0542791	16.1058	2.32291e-58	3.70077e-57
NEDD9	17699.7	0.824757	0.0512313	16.0987	2.60552e-58	4.14695e-57
WNT5A	2742.24	-1.23642	0.0768562	-16.0874	3.12682e-58	4.9718e-57
CHST7	721.778	1.42945	0.0888686	16.0849	3.25413e-58	5.16919e-57
C9orf91	1230.44	-1.20594	0.0750095	-16.0771	3.69064e-58	5.85687e-57
SRPX2	3729.06	-1.05803	0.0658513	-16.0669	4.35227e-58	6.90013e-57
SMAD3	1986.98	1.02828	0.0640671	16.0501	5.70383e-58	9.03412e-57
PCDH1	5386.76	-1.00035	0.062375	-16.0377	6.97277e-58	1.10332e-56
PNMA1	12783.2	0.724112	0.0451532	16.0368	7.07469e-58	1.11836e-56
KDM6B	8465.85	0.903918	0.0564057	16.0253	8.50679e-58	1.34345e-56
PHC2	9275.53	0.743231	0.0463808	16.0245	8.61259e-58	1.35884e-56
AES	10917.2	-0.960174	0.0599269	-16.0224	8.90966e-58	1.40299e-56
MGST1	343.108	-2.16781	0.135298	-16.0225	8.90118e-58	1.40299e-56
BLVRB	515.901	-1.69777	0.105986	-16.0188	9.45315e-58	1.48714e-56
PLCB4	1259.27	-1.15429	0.0722082	-15.9856	1.61084e-57	2.53168e-56
SSBP3	3709.21	0.87393	0.0546751	15.9841	1.65016e-57	2.59097e-56
PSMD2	18560.7	0.774144	0.0484477	15.979	1.791e-57	2.8094e-56
STIP1	11926.3	0.803758	0.0503333	15.9687	2.11074e-57	3.30778e-56
DAB2	6229.69	-0.912738	0.0572791	-15.9349	3.62755e-57	5.67933e-56
TIMP1	5262.19	0.936369	0.0587863	15.9284	4.02768e-57	6.29973e-56
DGKQ	1776.51	1.35248	0.0849109	15.9282	4.03569e-57	6.3062e-56
CAV2	3842.68	-0.940835	0.0590937	-15.9211	4.52608e-57	7.06572e-56
WIPF1	2205.91	-1.03581	0.06507	-15.9184	4.72432e-57	7.36812e-56
RBBP8	2023.79	-1.12758	0.0708607	-15.9126	5.18136e-57	8.07321e-56
TSC22D3	2474.62	-1.17582	0.0739445	-15.9014	6.19815e-57	9.64828e-56
ECHDC2	249.729	-2.57816	0.162154	-15.8994	6.39384e-57	9.94339e-56
TNFAIP1	8601.62	0.815076	0.0512785	15.8951	6.85217e-57	1.0646e-55
RGS4	2480.23	-1.34214	0.084454	-15.892	7.20334e-57	1.1181e-55
RCC2	10735.1	-0.816209	0.051368	-15.8894	7.50134e-57	1.16324e-55
EPRS	16181.6	-0.819707	0.0515904	-15.8888	7.58131e-57	1.17453e-55
ARHGEF26	3303.46	0.910235	0.0573079	15.8832	8.27938e-57	1.28146e-55
RAB27A	1509.28	-1.14055	0.0718267	-15.8791	8.83786e-57	1.3666e-55
EDEM3	8752.82	0.918846	0.0578655	15.879	8.85931e-57	1.36862e-55
STAC	2070.63	-0.988746	0.0623048	-15.8695	1.0306e-56	1.5906e-55
HABP4	3835.02	0.99306	0.0625845	15.8675	1.06393e-56	1.64049e-55
HIC1	720.125	-1.40861	0.0888231	-15.8586	1.22524e-56	1.88742e-55
IL17RC	529.563	-1.75969	0.111036	-15.8479	1.45438e-56	2.23829e-55
VEGFA	13535.2	-1.10917	0.0699914	-15.8472	1.46961e-56	2.25959e-55
XKR4	2104.28	1.26579	0.0798782	15.8465	1.48576e-56	2.28227e-55
RHOQ	5900.96	-0.906455	0.0572436	-15.835	1.78337e-56	2.73686e-55
PTPRS	18732.6	0.841407	0.0531888	15.8192	2.29212e-56	3.51429e-55
GPX7	255.74	-2.37398	0.15013	-15.8128	2.53856e-56	3.88848e-55
RAB7L1	787.885	-1.47044	0.0930813	-15.7973	3.24498e-56	4.96588e-55
CLPP	789.698	-1.55748	0.098611	-15.7942	3.41357e-56	5.21898e-55
KIAA0195	1981.56	-1.06785	0.0676496	-15.785	3.94653e-56	6.02817e-55
FXYD5	178.565	-3.04645	0.193064	-15.7795	4.30841e-56	6.57476e-55
MAGED2	12860.1	-0.792285	0.0502267	-15.7742	4.68415e-56	7.14147e-55
SDK1	3156.42	1.07196	0.0680075	15.7623	5.65302e-56	8.61056e-55
NASP	5935.77	0.922934	0.0585906	15.7522	6.62833e-56	1.00867e-54
ZNF827	5651.39	-0.823325	0.0522694	-15.7516	6.69753e-56	1.01825e-54
TRANK1	227.721	-2.51578	0.159849	-15.7385	8.23785e-56	1.25126e-54
NRBP1	10457.5	0.775315	0.0492795	15.733	8.97992e-56	1.36271e-54
CNTN2	605.144	-1.7534	0.111577	-15.7147	1.19972e-55	1.81889e-54
PER3	937.988	-1.23123	0.0783861	-15.7073	1.34834e-55	2.04232e-54
GPRC5C	161.557	-3.3522	0.213456	-15.7044	1.41009e-55	2.13386e-54
AGPAT2	597.724	-1.51185	0.096367	-15.6885	1.81283e-55	2.74077e-54
TPPP	1588.2	1.27759	0.0814382	15.6878	1.83165e-55	2.76665e-54
RHBDD3	616.993	-1.49445	0.0952782	-15.6852	1.91076e-55	2.88347e-54
NFATC1	604.235	-1.49111	0.0951668	-15.6683	2.49027e-55	3.75453e-54
LAMB3	211.983	-3.15963	0.201671	-15.6673	2.53304e-55	3.81547e-54
TIMELESS	1022.61	1.21268	0.0774242	15.6629	2.71344e-55	4.08343e-54
DSEL	5337.11	1.01032	0.0645559	15.6503	3.30421e-55	4.9679e-54
SLC5A12	135.603	-4.27808	0.273428	-15.6461	3.53393e-55	5.30839e-54
TSPAN14	5215.3	0.840555	0.0537981	15.6242	4.97802e-55	7.4707e-54
SARS	15981.8	-0.74055	0.0474181	-15.6175	5.53666e-55	8.30143e-54
LTA4H	4941.26	0.833363	0.0533706	15.6146	5.78801e-55	8.67031e-54
GJC1	2415.95	1.25966	0.0807406	15.6013	7.13051e-55	1.06715e-53
NIN	7745.49	0.886276	0.0568364	15.5935	8.06535e-55	1.20595e-53
SIK2	6716.12	0.839982	0.0538878	15.5876	8.83708e-55	1.32013e-53
ADI1	2592.05	0.912343	0.0585327	15.5869	8.93742e-55	1.3339e-53
SCARA3	1684.86	-1.16065	0.0745648	-15.5656	1.24614e-54	1.85815e-53
FBXO31	2617.21	0.918293	0.0590098	15.5617	1.32537e-54	1.97449e-53
ELF4	1057.59	-1.29847	0.0834588	-15.5582	1.40029e-54	2.0842e-53
SESN2	6118.75	-0.836851	0.0538058	-15.5532	1.51384e-54	2.25115e-53
RNASEH2B	764.986	-1.34176	0.0862705	-15.553	1.51928e-54	2.25718e-53
ITSN1	5665.74	0.868449	0.0558437	15.5514	1.55605e-54	2.3097e-53
NR1D1	675.585	-1.41454	0.0909624	-15.5508	1.57177e-54	2.33092e-53
GRIN3A	651.711	-1.93458	0.124514	-15.537	1.94875e-54	2.88734e-53
PHLDA1	8407.91	0.937485	0.0603497	15.5342	2.03584e-54	3.01364e-53
MIB1	11345.3	0.865983	0.0557628	15.5298	2.1814e-54	3.22618e-53
GALNT18	538.69	1.79689	0.11587	15.5078	3.0705e-54	4.53698e-53
IL17RA	1714.04	-1.1532	0.0743938	-15.5013	3.39867e-54	5.01735e-53
PHLPP2	2696.36	0.943806	0.0608864	15.5011	3.40988e-54	5.02934e-53
P2RX3	776.374	-1.65785	0.106983	-15.4964	3.66894e-54	5.40654e-53
RGL1	2602.48	0.917133	0.0593446	15.4544	7.04998e-54	1.03795e-52
C8orf4	234.787	-2.45118	0.158786	-15.437	9.22508e-54	1.35695e-52
TBL1XR1	7778.69	-1.1423	0.0740411	-15.4279	1.06229e-53	1.56115e-52
HTT	10430.7	0.976592	0.0633154	15.4242	1.1249e-53	1.65168e-52
TXNDC16	1631.27	1.12563	0.0730022	15.4191	1.21817e-53	1.78701e-52
ANTXR1	23693.3	0.973936	0.0632313	15.4028	1.56836e-53	2.29866e-52
ABCA1	25570.3	0.967784	0.0628329	15.4025	1.5741e-53	2.305e-52
CERS6	9271.22	0.803855	0.0523004	15.37	2.60286e-53	3.80803e-52
SPTAN1	64443.3	0.987866	0.0643028	15.3627	2.91138e-53	4.25557e-52
RASSF3	2577.27	-1.2892	0.0839228	-15.3617	2.95495e-53	4.31539e-52
UHRF1BP1	3530.87	-0.926307	0.0603727	-15.3431	3.93724e-53	5.74477e-52
LACE1	235.059	-2.34411	0.152934	-15.3276	5.00169e-53	7.29137e-52
CASP1	228.224	-2.84289	0.185516	-15.3242	5.26872e-53	7.67378e-52
NEXN	5279.25	-1.35095	0.0881757	-15.3211	5.52914e-53	8.04588e-52
CTNNAL1	1496.67	1.12684	0.0736138	15.3075	6.81182e-53	9.90357e-52
ADAM15	3292.09	0.934692	0.061086	15.3013	7.49917e-53	1.08932e-51
PCDH17	1499.22	1.155	0.0755264	15.2927	8.55484e-53	1.24156e-51
TDRP	477.445	-1.64624	0.107693	-15.2864	9.41794e-53	1.3656e-51
NRBF2	3086.69	-1.01136	0.0662222	-15.2722	1.17085e-52	1.69623e-51
FN1	856856	-2.05449	0.13462	-15.2614	1.38265e-52	2.00128e-51
FDXR	1217.21	-1.1699	0.0766642	-15.26	1.41193e-52	2.04184e-51
CHRM3	1422.05	-1.08792	0.0713722	-15.2429	1.8367e-52	2.65377e-51
TNFRSF12A	10347.5	0.877593	0.0576014	15.2356	2.05211e-52	2.96238e-51
PRRX1	7820.56	-0.944396	0.0619933	-15.2338	2.10853e-52	3.04113e-51
IL32	126.147	-4.83761	0.317928	-15.216	2.76812e-52	3.98893e-51
CLGN	698.677	1.71614	0.112824	15.2107	3.0035e-52	4.3243e-51
BTD	1583.09	1.13385	0.0745593	15.2073	3.16263e-52	4.54939e-51
FAXDC2	296.68	-2.08992	0.13744	-15.2061	3.22187e-52	4.63052e-51
VWA1	10270.8	-0.793721	0.0522012	-15.205	3.27491e-52	4.70259e-51
LACC1	325.817	-1.92293	0.126474	-15.2042	3.31608e-52	4.75753e-51
TFPI2	247.859	2.28494	0.150463	15.1861	4.37461e-52	6.27066e-51
MEIS2	15707.4	0.793274	0.0523213	15.1616	6.3521e-52	9.09724e-51
AGRN	30471.9	0.808009	0.053314	15.1557	6.95066e-52	9.94572e-51
OGFOD3	2523.73	0.88342	0.0582966	15.1539	7.14287e-52	1.02118e-50
PGD	14691.4	0.729835	0.0481854	15.1464	8.00315e-52	1.14317e-50
AQP3	238.967	2.443	0.161304	15.1454	8.13145e-52	1.16048e-50
PRDM8	679.788	1.44876	0.0956904	15.1401	8.81104e-52	1.25636e-50
GXYLT1	3621.17	1.00865	0.0666709	15.1288	1.04653e-51	1.49094e-50
FNBP1	5178.58	0.810317	0.0535643	15.1279	1.05967e-51	1.50835e-50
CEND1	1604.39	1.17121	0.0774305	15.1259	1.0928e-51	1.55414e-50
ZSWIM6	7255.3	0.940879	0.0622068	15.125	1.10756e-51	1.57375e-50
EPT1	6020.76	0.856596	0.0566353	15.1248	1.11202e-51	1.57872e-50
ARID5A	989.784	1.18786	0.0786373	15.1056	1.48738e-51	2.10977e-50
NINJ2	125.785	-4.51943	0.299315	-15.0993	1.63756e-51	2.32078e-50
NDST2	2087.14	1.06081	0.0702643	15.0974	1.68521e-51	2.38623e-50
DDI2	3575.44	0.895523	0.0594039	15.0752	2.35943e-51	3.33803e-50
EFCAB4A	282.459	2.34629	0.155645	15.0746	2.37863e-51	3.36227e-50
AIM1	361.507	-2.03491	0.135	-15.0734	2.42384e-51	3.4232e-50
TAX1BP3	6961.93	0.804857	0.0534071	15.0702	2.54251e-51	3.58769e-50
ZMIZ2	6667.95	0.78334	0.0519897	15.0672	2.66002e-51	3.75025e-50
TMEM30A	25726	0.855405	0.0567816	15.0648	2.7592e-51	3.88672e-50
CADM4	6958.66	0.857979	0.0570065	15.0505	3.42385e-51	4.81882e-50
SKI	10110.9	0.884664	0.0588405	15.0349	4.33413e-51	6.09471e-50
DUSP1	1839.61	1.09689	0.0729577	15.0346	4.35345e-51	6.11659e-50
DNMBP	2418.55	1.05477	0.0701646	15.0328	4.47984e-51	6.28876e-50
ORAI1	675.161	1.34575	0.0896496	15.0112	6.19723e-51	8.69212e-50
HSP90AA1	93435.8	0.798129	0.0531696	15.011	6.21939e-51	8.7157e-50
SYTL1	124.09	-3.96897	0.26451	-15.005	6.8123e-51	9.53838e-50
TRIM16L	829.456	-1.38628	0.0924516	-14.9947	7.95338e-51	1.11265e-49
VPS13A	5755.1	0.765751	0.0510725	14.9934	8.10736e-51	1.13322e-49
HMCN2	264.542	-2.13078	0.142165	-14.988	8.79e-51	1.22759e-49
IER3	5589.96	0.749855	0.0500357	14.9864	9.01125e-51	1.25741e-49
SLC22A17	4127.87	0.786586	0.0524871	14.9863	9.02774e-51	1.25863e-49
DNPEP	1219.21	-1.1695	0.0780485	-14.9843	9.30645e-51	1.29638e-49
EXT1	7306.97	0.817706	0.0545763	14.9828	9.51212e-51	1.3239e-49
DST	59701.2	1.05239	0.0702426	14.9822	9.59414e-51	1.33417e-49
AFAP1	16625.3	0.724452	0.0483596	14.9805	9.84373e-51	1.36772e-49
OAS3	122.288	-4.47551	0.298781	-14.9792	1.00387e-50	1.39361e-49
GOLM1	22226.8	0.848348	0.0566598	14.9727	1.10779e-50	1.53657e-49
AK1	1381.27	-1.05205	0.0702761	-14.9702	1.14957e-50	1.59317e-49
LPCAT1	6123.85	0.760941	0.0508414	14.967	1.20692e-50	1.67123e-49
CEBPG	3415	-0.917255	0.0612872	-14.9665	1.21551e-50	1.6817e-49
APPL2	2137.86	0.9335	0.0624589	14.9458	1.65826e-50	2.29231e-49
PSTPIP2	412.485	-1.67555	0.112118	-14.9445	1.69158e-50	2.33639e-49
COL8A1	97182.6	-0.953746	0.0638298	-14.942	1.75576e-50	2.42298e-49
C3orf80	174.899	-2.8365	0.189844	-14.9412	1.77717e-50	2.45045e-49
MAPK10	1493.97	-1.01026	0.0676172	-14.9409	1.78676e-50	2.46159e-49
PI4KA	8089.16	0.989269	0.0662846	14.9246	2.28098e-50	3.13982e-49
KIAA1407	429.313	-1.71726	0.11508	-14.9224	2.35796e-50	3.24304e-49
MOV10	2122	-0.967045	0.0648097	-14.9213	2.39566e-50	3.29211e-49
AMOTL2	9612.8	0.738461	0.0494937	14.9203	2.43111e-50	3.33801e-49
PRSS23	60743.8	-0.781223	0.0523856	-14.9129	2.71588e-50	3.72587e-49
UAP1L1	1119.1	-1.32377	0.0888523	-14.8985	3.36993e-50	4.61926e-49
FBXO32	5421.02	-0.884606	0.0594046	-14.8912	3.75985e-50	5.14941e-49
NF2	12385.2	0.850409	0.0571836	14.8715	5.0434e-50	6.90154e-49
RTF1	8569.97	0.864675	0.0581436	14.8714	5.0559e-50	6.91284e-49
CIRBP	24739.9	0.781192	0.0525388	14.8689	5.24874e-50	7.1705e-49
ARHGAP9	118.965	-4.60522	0.309765	-14.8668	5.41293e-50	7.3886e-49
STAT1	7526.25	0.804691	0.0542113	14.8436	7.65208e-50	1.04363e-48
KPNA2	4636.74	0.804597	0.0542446	14.8328	8.99518e-50	1.22578e-48
CS	11725.1	0.731987	0.0493697	14.8266	9.85419e-50	1.34172e-48
CASP8	579.249	-1.58379	0.106865	-14.8205	1.08042e-49	1.46984e-48
NR6A1	781.517	1.38161	0.0932594	14.8147	1.17775e-49	1.60092e-48
TARS	11747.5	-0.736158	0.0497096	-14.8092	1.27839e-49	1.73627e-48
CRYZ	1054.29	-1.17244	0.0791848	-14.8064	1.33247e-49	1.80822e-48
LRP6	7587.57	0.883866	0.0597332	14.7969	1.53415e-49	2.08017e-48
TNRC6C	2225.86	0.975684	0.0659522	14.7938	1.60601e-49	2.17579e-48
DCT	244.13	-2.16026	0.146058	-14.7904	1.68853e-49	2.28568e-48
CPNE3	9255.83	0.884301	0.0598478	14.7758	2.09739e-49	2.83678e-48
HNMT	263.719	-2.4956	0.168906	-14.7751	2.12162e-49	2.86718e-48
POU3F2	11779.3	0.868115	0.0588028	14.7632	2.53146e-49	3.4182e-48
ATP1B2	1393.23	1.33851	0.0906839	14.7602	2.64587e-49	3.56974e-48
KIRREL	34339.3	-0.763915	0.0518044	-14.7461	3.25835e-49	4.39244e-48
MEX3D	3594.82	0.871131	0.0590995	14.7401	3.56322e-49	4.79945e-48
DDR1	12281	-0.806635	0.0547524	-14.7324	3.99245e-49	5.37316e-48
ASAP1	7255.76	0.806842	0.0547963	14.7244	4.49561e-49	6.04533e-48
LRRC49	850.622	-1.2249	0.0831932	-14.7236	4.548e-49	6.11074e-48
VCAM1	310.256	-2.58289	0.175434	-14.7229	4.59605e-49	6.17022e-48
SBK1	3176.25	1.01746	0.0691847	14.7065	5.85706e-49	7.85666e-48
SEC24D	8787.3	-0.829463	0.0564041	-14.7057	5.9241e-49	7.94005e-48
ALK	1123.78	1.11139	0.0756468	14.6918	7.27854e-49	9.74738e-48
LAGE3	858.952	1.325	0.0902253	14.6855	7.98796e-49	1.06886e-47
FKRP	1887.06	0.946125	0.0644604	14.6776	8.96812e-49	1.19903e-47
ABHD17B	1423.78	1.12195	0.0764544	14.6748	9.34498e-49	1.2484e-47
ARHGAP17	4153.21	0.816114	0.0556193	14.6732	9.56945e-49	1.27734e-47
SOWAHC	2873.36	1.00743	0.0686697	14.6706	9.93944e-49	1.32564e-47
VKORC1L1	6890.1	0.747017	0.0509205	14.6703	9.99548e-49	1.33202e-47
ZDHHC3	4727.42	0.780128	0.0531804	14.6695	1.01137e-48	1.34667e-47
IFIT3	271.996	-2.16803	0.147796	-14.669	1.01829e-48	1.35479e-47
BEND6	2440.88	0.996094	0.0679571	14.6577	1.20288e-48	1.59906e-47
IL18R1	141.861	-3.40447	0.232288	-14.6562	1.22921e-48	1.63274e-47
PPP1CC	5905.52	0.7557	0.0515927	14.6474	1.39944e-48	1.85734e-47
TCIRG1	531.672	-1.61605	0.110474	-14.6284	1.85219e-48	2.45623e-47
ELFN1	484.552	-1.59058	0.108749	-14.6262	1.91264e-48	2.53432e-47
SCD	38853.7	-0.818952	0.0560087	-14.6219	2.03696e-48	2.69686e-47
FAM129B	18655.7	0.798647	0.0546469	14.6147	2.26375e-48	2.9947e-47
ZNF48	1781.32	0.958253	0.0656046	14.6065	2.55341e-48	3.37514e-47
WWC3	2724.06	0.895243	0.0612946	14.6056	2.58754e-48	3.41672e-47
PLEKHG5	1171.25	-1.42389	0.0974897	-14.6055	2.58906e-48	3.41672e-47
PRKAR2B	2157.55	1.08358	0.0742149	14.6006	2.78415e-48	3.6712e-47
GNG11	339.743	-2.09001	0.143171	-14.598	2.89107e-48	3.8091e-47
SIX3	172.375	-2.77038	0.189922	-14.5869	3.402e-48	4.47866e-47
MGP	265.427	-2.15311	0.147664	-14.5811	3.70308e-48	4.8711e-47
CBX2	412.805	1.67004	0.114568	14.5768	3.94505e-48	5.18519e-47
RALGAPA1	2532.96	0.938028	0.0643791	14.5704	4.33405e-48	5.69189e-47
GRIA1	1859.93	-1.07292	0.073639	-14.57	4.35768e-48	5.71831e-47
DZIP1	5817.9	0.813087	0.0558151	14.5675	4.5213e-48	5.92825e-47
GCH1	449.567	1.60607	0.110265	14.5655	4.6588e-48	6.10363e-47
ATP10A	1569.31	-0.994539	0.0682976	-14.5618	4.91225e-48	6.43052e-47
SPTLC2	7085.43	0.831989	0.0571659	14.554	5.51246e-48	7.21044e-47
HARS	5152.52	0.721467	0.0496287	14.5373	7.03063e-48	9.18887e-47
RRBP1	25057.8	-1.01753	0.070045	-14.5267	8.20234e-48	1.07117e-46
PKNOX2	430.033	-1.59044	0.109508	-14.5236	8.59239e-48	1.12121e-46
CDC42EP3	23273.7	-0.747093	0.0514814	-14.5119	1.01841e-47	1.32784e-46
HMG20B	4060.81	0.827257	0.0570107	14.5106	1.03853e-47	1.353e-46
RREB1	1833.5	-0.974039	0.0671284	-14.5101	1.04573e-47	1.36129e-46
LTBP4	607.206	-1.53192	0.105594	-14.5076	1.08458e-47	1.41074e-46
EGF	227.174	-2.28804	0.157798	-14.4998	1.21498e-47	1.57908e-46
PDZRN3	481.13	-1.60941	0.111	-14.4992	1.22615e-47	1.59234e-46
PANK3	13735.6	0.717752	0.0495142	14.4959	1.28625e-47	1.66905e-46
DNAJB6	7732.74	0.759029	0.0523814	14.4904	1.39274e-47	1.8058e-46
KCTD11	6335.45	0.761187	0.0525631	14.4814	1.58881e-47	2.05838e-46
SOX4	30245.4	1.10666	0.076445	14.4766	1.70416e-47	2.20607e-46
ASPN	129.8	-5.51756	0.381185	-14.4748	1.74933e-47	2.26274e-46
WSB2	7163.58	-0.75604	0.0522361	-14.4735	1.78137e-47	2.30235e-46
SH3BGRL	6515.73	-1.0164	0.0702739	-14.4635	2.06197e-47	2.66291e-46
RARRES3	112.426	-4.41869	0.305733	-14.4528	2.40755e-47	3.10675e-46
ONECUT2	6713.28	1.11963	0.0774773	14.451	2.47056e-47	3.18553e-46
TXNRD2	306.223	-2.03329	0.140723	-14.4489	2.54635e-47	3.28067e-46
PNRC2	5514.17	0.809245	0.0560103	14.4482	2.57485e-47	3.31476e-46
MAPK8	4284.99	0.79004	0.0546836	14.4475	2.60042e-47	3.34504e-46
MFSD1	3572.41	-0.841495	0.0582741	-14.4403	2.88563e-47	3.70899e-46
LRIG3	2468.64	-0.968986	0.0671297	-14.4345	3.1374e-47	4.02942e-46
ARRDC2	202.607	-2.4616	0.170612	-14.428	3.44764e-47	4.42438e-46
MAN1A1	3250.77	1.10909	0.0768768	14.4268	3.50833e-47	4.49872e-46
ZNF280C	904.161	1.21014	0.0839467	14.4155	4.13228e-47	5.29464e-46
RPRD1A	5286.54	0.797352	0.0553305	14.4107	4.43097e-47	5.6729e-46
KANK2	2840.68	-0.940005	0.0652301	-14.4106	4.43893e-47	5.67863e-46
TMEM184B	7825.57	0.700508	0.0487041	14.3829	6.62402e-47	8.46732e-46
STXBP2	350.846	-1.89834	0.132056	-14.3753	7.39644e-47	9.44727e-46
RCOR1	4305.08	0.816039	0.056786	14.3704	7.93476e-47	1.01269e-45
SNX33	2604.79	-0.839421	0.0584144	-14.3701	7.9729e-47	1.01676e-45
RYR3	453.93	-1.60691	0.111828	-14.3695	8.04604e-47	1.02529e-45
RCN2	7564.4	0.929908	0.0647687	14.3574	9.58183e-47	1.22004e-45
COL9A2	952.293	-1.27203	0.088599	-14.3571	9.61336e-47	1.2231e-45
NCEH1	1944.94	1.0182	0.0709625	14.3484	1.09032e-46	1.38611e-45
PTPN1	11499.1	0.712315	0.0496494	14.3469	1.11398e-46	1.4151e-45
ZNF605	1709.23	-0.969414	0.0675748	-14.3458	1.13204e-46	1.43691e-45
TRAM2	28355.9	-0.68372	0.0476614	-14.3454	1.1391e-46	1.44475e-45
MINPP1	2187.97	0.99062	0.0690936	14.3374	1.27823e-46	1.61995e-45
FAM196B	244.846	-2.21416	0.154442	-14.3365	1.29464e-46	1.63948e-45
LOXL4	2583.27	0.873513	0.0609329	14.3357	1.30983e-46	1.65742e-45
MYRF	557.654	-1.51565	0.105751	-14.3323	1.37467e-46	1.73812e-45
DAAM2	488.84	-1.57109	0.109642	-14.3293	1.43628e-46	1.81462e-45
SCD5	8992.08	0.822196	0.0574481	14.312	1.84213e-46	2.32557e-45
TMEM206	1300.49	1.02568	0.071675	14.3102	1.89015e-46	2.38434e-45
TRIM28	11957.1	0.787081	0.0550312	14.3024	2.11242e-46	2.66266e-45
PRKAR1B	1181.61	-1.08041	0.0756087	-14.2894	2.54619e-46	3.20581e-45
PIK3IP1	2066.62	-1.08612	0.0760088	-14.2894	2.54726e-46	3.20581e-45
FNBP1L	11037.6	0.765761	0.0536334	14.2777	3.01457e-46	3.78809e-45
ZNF358	466.022	-1.53594	0.107576	-14.2777	3.01355e-46	3.78809e-45
STAT6	188.651	-2.89343	0.202726	-14.2726	3.24176e-46	4.07043e-45
NLRX1	735.711	-1.23945	0.0868998	-14.263	3.72059e-46	4.66806e-45
FAM171B	4160.47	0.907531	0.0636345	14.2616	3.79553e-46	4.75843e-45
IDS	30448.9	0.6181	0.043384	14.2472	4.6665e-46	5.84586e-45
ANXA6	9847.35	-0.791746	0.0556136	-14.2366	5.434e-46	6.8021e-45
GRK6	1330.42	0.982848	0.0690478	14.2343	5.61083e-46	7.01806e-45
DDAH1	9182.1	0.728798	0.0512159	14.2299	5.97563e-46	7.46862e-45
ADPRH	137.407	-3.11535	0.218942	-14.2291	6.04532e-46	7.54993e-45
HINT3	2350.48	-0.928244	0.0652626	-14.2232	6.57725e-46	8.20797e-45
CHST6	191.152	-2.49611	0.175498	-14.223	6.59297e-46	8.22128e-45
CLDN1	388.475	-1.67659	0.117955	-14.2138	7.52162e-46	9.37213e-45
GSAP	141.724	-3.19529	0.224842	-14.2113	7.80102e-46	9.71284e-45
APLP2	86864.3	0.873937	0.0614974	14.211	7.83401e-46	9.74646e-45
COL14A1	23437.6	-0.870886	0.0612885	-14.2096	7.98544e-46	9.92728e-45
TMEM66	23521.9	0.690727	0.0486687	14.1924	1.02087e-45	1.26816e-44
SMARCD2	2697.58	0.819051	0.0577113	14.1922	1.02392e-45	1.27097e-44
PBXIP1	18172.5	0.815383	0.0574534	14.1921	1.02595e-45	1.27253e-44
EMP2	480.558	-1.59522	0.112418	-14.1901	1.05554e-45	1.30822e-44
HTRA1	12769.8	0.881017	0.0620919	14.1889	1.07298e-45	1.32883e-44
TSPAN13	4797.87	0.828749	0.058431	14.1834	1.16118e-45	1.43697e-44
LCLAT1	1135.05	-1.12627	0.0794541	-14.1751	1.30684e-45	1.616e-44
TIGD7	1116.63	-1.08764	0.0767673	-14.168	1.44559e-45	1.78621e-44
LMOD1	2343.26	-0.915453	0.0646293	-14.1647	1.51577e-45	1.87152e-44
SLC4A10	190.935	-2.68619	0.189701	-14.1601	1.61749e-45	1.9956e-44
IER2	3373.65	0.894765	0.0632094	14.1556	1.7254e-45	2.12712e-44
P4HA3	1737.4	-0.98284	0.0694583	-14.1501	1.86541e-45	2.29799e-44
GRIK4	133.428	-3.32433	0.234949	-14.1492	1.88994e-45	2.32646e-44
HS3ST3A1	3015.07	0.859731	0.0607891	14.1428	2.0675e-45	2.5431e-44
IL20RB	135.293	-3.05715	0.21617	-14.1423	2.08289e-45	2.5601e-44
BFSP1	234.002	-2.41837	0.171014	-14.1414	2.11111e-45	2.59283e-44
ARHGEF37	373.34	-1.67948	0.118787	-14.1386	2.1958e-45	2.69481e-44
FIBCD1	810.889	-1.45807	0.103149	-14.1356	2.29249e-45	2.81136e-44
SNX25	1580.95	1.00805	0.0713248	14.1333	2.36765e-45	2.90135e-44
GAS6	11755.6	-0.708971	0.0501709	-14.1311	2.4424e-45	2.9907e-44
LZTS3	2332.42	0.949399	0.0671972	14.1286	2.53298e-45	3.09929e-44
ARHGEF6	4240.57	-0.726639	0.0514384	-14.1264	2.61124e-45	3.19264e-44
GOT1	2847.59	-0.885792	0.0627393	-14.1186	2.91705e-45	3.56388e-44
NCKAP5	130.803	-3.63685	0.257603	-14.118	2.9411e-45	3.59056e-44
TRIM33	5345.06	0.820478	0.0581392	14.1123	3.19018e-45	3.89174e-44
HLA-B	16528.9	-0.862583	0.0611545	-14.105	3.5387e-45	4.31366e-44
PTK2B	502.69	-1.59897	0.113368	-14.1042	3.57766e-45	4.3579e-44
GPAA1	5182.28	0.789041	0.0559445	14.104	3.58895e-45	4.36839e-44
PIGM	2630.43	0.943512	0.0669454	14.0937	4.14932e-45	5.04668e-44
PDE4A	187.73	-2.49266	0.176942	-14.0874	4.53733e-45	5.5145e-44
HOXB2	3738.73	0.966816	0.0686435	14.0846	4.72358e-45	5.73659e-44
DMGDH	151.953	-2.89228	0.205459	-14.0772	5.24402e-45	6.36389e-44
PORCN	502.255	-1.44163	0.102463	-14.0698	5.82674e-45	7.06579e-44
TMEM38B	1684.95	1.14447	0.0813521	14.068	5.96976e-45	7.23383e-44
RBMS1	12841	0.701224	0.0498593	14.064	6.31747e-45	7.64949e-44
ALDOA	102334	0.669412	0.0475978	14.0639	6.32554e-45	7.65358e-44
CEP41	1031.93	-1.15005	0.0818151	-14.0567	7.00697e-45	8.47179e-44
REEP1	3824.89	0.80446	0.0572319	14.0561	7.0635e-45	8.5338e-44
INA	10445.2	0.953087	0.0678587	14.0452	8.24803e-45	9.95751e-44
ZNF391	336.066	-1.8101	0.128889	-14.0439	8.39893e-45	1.01322e-43
GSTM1	149.126	-3.44966	0.245641	-14.0435	8.43784e-45	1.01716e-43
ZBTB38	4462.88	-0.840773	0.0599096	-14.034	9.65117e-45	1.16256e-43
GPR162	286.91	-2.03512	0.145034	-14.032	9.93355e-45	1.19569e-43
IRS1	6813.87	-0.874424	0.0623443	-14.0257	1.08479e-44	1.30479e-43
SLC4A3	1929.51	-0.884715	0.0630849	-14.0242	1.10858e-44	1.33243e-43
SLC25A44	3471.13	0.850046	0.0606269	14.021	1.16051e-44	1.3938e-43
MXRA8	7778.41	-0.772509	0.0551037	-14.0192	1.18985e-44	1.428e-43
RAP1A	4315.92	0.845865	0.0603375	14.0189	1.1947e-44	1.43276e-43
PRR16	1230.55	-1.07827	0.0769384	-14.0148	1.26609e-44	1.51726e-43
ALKBH8	663.55	-1.30929	0.0934577	-14.0094	1.36532e-44	1.63497e-43
PCBP3	317.414	1.84276	0.131587	14.0042	1.46938e-44	1.75829e-43
DIAPH1	6699.27	0.822843	0.0587575	14.004	1.47254e-44	1.76078e-43
CXADR	4654.23	1.1253	0.0804125	13.9941	1.69351e-44	2.02352e-43
SYN1	1694.71	1.11685	0.0798169	13.9927	1.72742e-44	2.06252e-43
NPL	190.489	-2.43652	0.174307	-13.9783	2.1135e-44	2.52165e-43
ARHGEF35	107.642	-4.37734	0.313164	-13.9778	2.13044e-44	2.54001e-43
NPTX2	736.147	1.4056	0.100643	13.9662	2.50557e-44	2.98507e-43
RFTN1	2124.44	-0.845718	0.0605849	-13.9592	2.76396e-44	3.2905e-43
KIF5C	18062.5	0.821027	0.0588192	13.9585	2.79309e-44	3.32276e-43
FAM118B	1762.21	0.922643	0.0661386	13.9502	3.1394e-44	3.73201e-43
SSH2	3742.63	0.759309	0.0544683	13.9404	3.60002e-44	4.27647e-43
AIFM2	715.353	-1.40865	0.1011	-13.9332	3.98388e-44	4.72901e-43
BCR	3763.57	0.771059	0.0553576	13.9287	4.24025e-44	5.02966e-43
CORO2A	616.045	-1.2815	0.0920111	-13.9277	4.3027e-44	5.10003e-43
LAPTM4B	8875.74	0.77393	0.0555782	13.9251	4.46176e-44	5.28472e-43
LEPRE1	12959.5	0.734177	0.0527327	13.9226	4.61743e-44	5.46514e-43
OTUD3	2055.83	0.961461	0.0690795	13.9182	4.9133e-44	5.8111e-43
GRK5	1272.96	0.993372	0.0713992	13.9129	5.28689e-44	6.24842e-43
RAB36	549.445	-1.34013	0.0963263	-13.9124	5.3282e-44	6.29269e-43
MANEA	1425.77	-1.17534	0.084513	-13.9072	5.7263e-44	6.75795e-43
CHRNA5	378.302	1.67568	0.1205	13.9061	5.81619e-44	6.85907e-43
B4GALT2	3299.47	-0.778862	0.0560347	-13.8996	6.36531e-44	7.50122e-43
ST18	107.851	-4.59897	0.331077	-13.8909	7.18995e-44	8.46689e-43
TMEM178B	4044.88	0.782543	0.0563522	13.8866	7.63255e-44	8.98161e-43
CAB39L	587.248	-1.48011	0.106628	-13.8811	8.24988e-44	9.70105e-43
PTPRK	6882.12	0.850254	0.0612634	13.8787	8.5314e-44	1.00249e-42
CHSY3	1629.3	0.967511	0.0697301	13.8751	8.96956e-44	1.05321e-42
PPP2R5A	1450.7	1.02579	0.0739448	13.8724	9.31058e-44	1.09247e-42
PELI2	2111.22	0.912646	0.0657947	13.8711	9.47871e-44	1.1114e-42
ADAM12	50847.9	-0.916519	0.0660973	-13.8662	1.01499e-43	1.18924e-42
DUSP14	2564.91	0.798347	0.0575854	13.8637	1.0511e-43	1.23066e-42
IFI27L2	708.254	-1.34147	0.096797	-13.8586	1.12882e-43	1.32071e-42
CD274	663.913	-1.26115	0.091023	-13.8553	1.18123e-43	1.38104e-42
WASF2	12731.6	-0.679178	0.0490207	-13.8549	1.18793e-43	1.38787e-42
LARS	10741.2	-0.650358	0.0469655	-13.8476	1.31567e-43	1.53602e-42
GALNT14	151.509	-3.03912	0.219487	-13.8465	1.336e-43	1.55863e-42
NDFIP2	3164.39	0.987545	0.0713222	13.8462	1.34045e-43	1.56271e-42
CTNNB1	38596.4	0.72545	0.0523946	13.8459	1.34704e-43	1.56927e-42
SLC39A11	520.856	-1.42015	0.102588	-13.8433	1.39698e-43	1.62629e-42
MRPS15	1207.46	-1.02228	0.073867	-13.8395	1.47315e-43	1.71373e-42
LMO7	2239.12	-0.839368	0.0606512	-13.8393	1.47701e-43	1.717e-42
SMCO3	106.567	-4.05619	0.2931	-13.8389	1.48418e-43	1.7241e-42
GABRE	487.043	2.00278	0.144776	13.8336	1.5973e-43	1.85419e-42
DTD1	2701.05	-0.822644	0.0594794	-13.8308	1.66276e-43	1.9288e-42
OGDH	6763.15	0.768483	0.055571	13.8289	1.70723e-43	1.97898e-42
CTPS1	2551.17	0.837943	0.060612	13.8247	1.8088e-43	2.09523e-42
SH2B3	3392.88	0.779394	0.0563919	13.821	1.90356e-43	2.20342e-42
F2RL2	225.041	-2.12453	0.153823	-13.8115	2.17273e-43	2.51321e-42
FAM171A2	1057.45	1.04335	0.0755442	13.8112	2.18279e-43	2.52306e-42
TSKU	4747.51	-0.72681	0.0526313	-13.8094	2.23532e-43	2.58195e-42
TRIM25	1922.54	-0.977862	0.0708488	-13.8021	2.47594e-43	2.85785e-42
KDM1A	9359.2	0.663844	0.0481244	13.7943	2.75685e-43	3.17984e-42
PSMD3	7645.05	0.66619	0.0482949	13.7942	2.76152e-43	3.18297e-42
METAP1D	366.076	-1.73824	0.126057	-13.7893	2.95633e-43	3.40511e-42
PARP1	8433.28	0.73457	0.0532752	13.7882	3.00152e-43	3.45471e-42
INTS7	1651.74	0.93351	0.0677082	13.7873	3.04108e-43	3.49778e-42
RRAS	2114.26	-0.908016	0.0658752	-13.7839	3.18707e-43	3.66311e-42
PIP5K1C	9237.04	0.688128	0.0499959	13.7637	4.21516e-43	4.84134e-42
PLXNB3	1240	-1.18843	0.0863638	-13.7608	4.3871e-43	5.03527e-42
MAST4	1608	-0.976161	0.0709441	-13.7596	4.46132e-43	5.11686e-42
KIF1B	22688.2	0.750753	0.0545636	13.7592	4.48346e-43	5.13864e-42
PAQR3	3685.3	0.887843	0.064537	13.7571	4.61562e-43	5.2864e-42
ZBTB11	2696.64	0.818999	0.0595402	13.7554	4.72729e-43	5.41049e-42
NRP1	12716.3	-0.629122	0.0457372	-13.7552	4.74213e-43	5.42367e-42
CASP3	4262.63	0.802166	0.0583217	13.7542	4.80798e-43	5.49512e-42
NETO2	2464.78	0.908176	0.0660303	13.7539	4.82333e-43	5.50881e-42
CD97	219.435	-2.18697	0.159023	-13.7525	4.91748e-43	5.6124e-42
MR1	125.273	-3.2022	0.232877	-13.7506	5.05093e-43	5.76067e-42
PDGFRA	917.805	-1.29519	0.0942103	-13.7478	5.24733e-43	5.98049e-42
PIANP	1051.1	-1.0401	0.0756995	-13.7398	5.86083e-43	6.67504e-42
C9orf16	3395.02	0.814394	0.0592857	13.7368	6.11484e-43	6.95948e-42
EPB41L2	7988.59	0.740484	0.0539094	13.7357	6.20376e-43	7.05575e-42
MORC4	2690.29	-0.83669	0.0609148	-13.7354	6.22871e-43	7.07919e-42
ZBED4	3626.94	0.790115	0.0575364	13.7324	6.49107e-43	7.37223e-42
METTL4	463.531	-1.51738	0.110633	-13.7155	8.19804e-43	9.30444e-42
MCOLN1	1103.37	1.03314	0.0753338	13.7141	8.35974e-43	9.48136e-42
COL4A1	235259	0.838649	0.0611718	13.7097	8.87689e-43	1.00609e-41
RCC1	2449.24	0.790719	0.0577637	13.6889	1.18353e-42	1.34046e-41
PHTF2	4041.25	1.02788	0.0751335	13.6808	1.32259e-42	1.49691e-41
GRID1	828.794	1.27506	0.09324	13.6751	1.43064e-42	1.61808e-41
ATRN	18214.7	0.713001	0.052187	13.6624	1.70267e-42	1.92442e-41
DCLRE1A	626.442	-1.26499	0.0926029	-13.6604	1.75134e-42	1.97806e-41
AFMID	266.841	-2.00301	0.146644	-13.659	1.78493e-42	2.0146e-41
DIAPH2	375.288	-1.67215	0.122443	-13.6566	1.84431e-42	2.08018e-41
KLHL7	3916.98	0.875168	0.0640884	13.6556	1.8685e-42	2.10601e-41
GLUL	9223.88	0.660128	0.0483682	13.648	2.07584e-42	2.33808e-41
XXYLT1	4744.36	0.798914	0.0585604	13.6426	2.23529e-42	2.51594e-41
PPAT	1926.48	0.87577	0.0642007	13.6411	2.27983e-42	2.56429e-41
DENND6A	1561.11	0.969567	0.0710774	13.641	2.28402e-42	2.56723e-41
NONO	25294.2	0.67971	0.0498492	13.6353	2.46918e-42	2.77344e-41
BVES	4048.91	-0.797043	0.0584592	-13.6342	2.50809e-42	2.81521e-41
HIST2H4B	115.661	3.76886	0.276483	13.6314	2.60384e-42	2.92067e-41
ISOC2	1163.9	-1.00644	0.0738354	-13.6309	2.62452e-42	2.94185e-41
FAM13B	5056.02	0.750675	0.0550903	13.6262	2.79594e-42	3.13183e-41
STUB1	4478.1	0.724157	0.0531516	13.6244	2.86855e-42	3.21097e-41
TTC19	3604.59	0.718635	0.0527572	13.6215	2.98226e-42	3.33595e-41
EXOC6B	5627.61	0.783345	0.0575265	13.6171	3.16864e-42	3.53959e-41
ZDHHC18	2211.99	0.810478	0.0595189	13.6171	3.16753e-42	3.53959e-41
TAF10	2133.46	0.87417	0.0641994	13.6165	3.196e-42	3.56769e-41
MXI1	2068.22	-0.855541	0.0628397	-13.6147	3.27674e-42	3.65532e-41
LRP11	2950.38	0.82891	0.0609166	13.6073	3.62457e-42	4.04058e-41
LRRC4	360.547	1.77143	0.130198	13.6057	3.70472e-42	4.12711e-41
ATP6V0D1	6137.96	0.775306	0.0569895	13.6044	3.77207e-42	4.19927e-41
PCBD1	860.702	-1.10715	0.0813969	-13.6019	3.90111e-42	4.33995e-41
MPPE1	981.476	-1.07291	0.078946	-13.5904	4.56291e-42	5.07274e-41
HERC6	218.707	-2.17384	0.16008	-13.5797	5.28189e-42	5.86805e-41
CDC42BPA	8770.44	-0.781806	0.0575792	-13.5779	5.41464e-42	6.01143e-41
MORC3	3033.65	0.756968	0.0557538	13.577	5.48459e-42	6.08494e-41
FAM3C	4356.72	0.93845	0.0691756	13.5662	6.35379e-42	7.0445e-41
MPHOSPH9	2264.3	0.986587	0.0727336	13.5644	6.51195e-42	7.21494e-41
REC8	1415.61	1.01532	0.0748535	13.5641	6.53577e-42	7.23641e-41
MYO9B	6607.63	0.714664	0.0526882	13.564	6.54412e-42	7.24073e-41
CERK	5976.2	0.773845	0.0570803	13.5571	7.18858e-42	7.94841e-41
ENOX1	739.762	1.38247	0.102015	13.5516	7.75388e-42	8.56764e-41
CC2D1A	1301.12	-0.969409	0.0715366	-13.5512	7.7914e-42	8.60327e-41
PIRT	113.32	-3.77414	0.278593	-13.5472	8.23552e-42	9.08751e-41
C5orf28	906.877	-1.14601	0.0846265	-13.542	8.83873e-42	9.74652e-41
B4GALT3	2250.53	0.810137	0.0598276	13.5412	8.93317e-42	9.844e-41
LRRC20	1088.01	1.1157	0.0824077	13.5388	9.23321e-42	1.01678e-40
PSME4	6614.18	0.646222	0.0477326	13.5384	9.28201e-42	1.02146e-40
PHIP	7540.53	0.761838	0.0562914	13.5338	9.87629e-42	1.08613e-40
LYST	2454.15	0.859498	0.0635095	13.5334	9.93535e-42	1.09188e-40
PEAR1	99.9879	-4.13901	0.306012	-13.5257	1.10342e-41	1.21183e-40
DLG4	2708.4	-0.963597	0.0712435	-13.5254	1.10737e-41	1.21535e-40
PDPK1	6638.97	0.727011	0.0537545	13.5246	1.11893e-41	1.22721e-40
BST2	216.783	-2.16377	0.15999	-13.5244	1.12231e-41	1.23009e-40
TTC27	918.92	-1.14055	0.0843919	-13.5149	1.27704e-41	1.39873e-40
SERPINI1	686.978	1.32362	0.0979529	13.5128	1.31447e-41	1.43877e-40
CCT2	9044.95	0.672253	0.0497609	13.5097	1.37164e-41	1.50033e-40
SLC40A1	968.409	1.139	0.0843188	13.5082	1.39897e-41	1.5292e-40
TDRD3	826.989	-1.17452	0.0869672	-13.5053	1.45599e-41	1.59047e-40
TRIP10	1592.97	-0.966496	0.0715795	-13.5024	1.51356e-41	1.65224e-40
GALNT1	13866.2	0.808159	0.059874	13.4977	1.6141e-41	1.76082e-40
BOC	1458.6	-0.937017	0.0694258	-13.4967	1.63617e-41	1.78369e-40
PPP2R3C	1344.38	-1.03544	0.0767354	-13.4936	1.705e-41	1.85749e-40
GFPT1	8177.2	-0.741665	0.0549664	-13.4931	1.71827e-41	1.8707e-40
ZFP36	1108.79	1.01259	0.0750465	13.4928	1.72391e-41	1.87559e-40
SZRD1	15000.1	0.674461	0.0499882	13.4924	1.73349e-41	1.88475e-40
LZTS2	2411.91	-0.863086	0.063999	-13.4859	1.89306e-41	2.05687e-40
ASNS	13525.4	-0.670085	0.049696	-13.4837	1.95148e-41	2.11894e-40
CCDC176	567.353	-1.32677	0.0984033	-13.4829	1.97081e-41	2.1385e-40
PFN1	22512	-0.699385	0.0518822	-13.4802	2.04443e-41	2.21691e-40
ANXA1	18204.9	-0.677337	0.0502844	-13.4701	2.34484e-41	2.54097e-40
NIPA1	3095.04	0.762699	0.0566266	13.4689	2.38298e-41	2.58059e-40
STRADA	2213.65	0.856894	0.0636245	13.468	2.41366e-41	2.61207e-40
MAPK8IP3	6401.64	1.00919	0.0750216	13.452	2.99632e-41	3.24048e-40
EPYC	99.0865	-4.20248	0.312456	-13.4498	3.08604e-41	3.3353e-40
GAREM	2135.83	0.803852	0.0597693	13.4493	3.10989e-41	3.35885e-40
NFAT5	10290.9	-0.681924	0.0507266	-13.4431	3.37884e-41	3.6469e-40
DRAM1	1382.13	-0.962477	0.0716045	-13.4416	3.45025e-41	3.72152e-40
BCKDHB	2382.1	0.877826	0.0653129	13.4403	3.50979e-41	3.78324e-40
QTRT1	901.049	-1.31043	0.097511	-13.4388	3.58115e-41	3.85761e-40
TMEM254	1095.3	-1.15583	0.0860151	-13.4376	3.64248e-41	3.92108e-40
PAPLN	268.47	-2.07492	0.154418	-13.4371	3.66612e-41	3.94393e-40
C17orf51	2517.1	0.825266	0.0614515	13.4296	4.05864e-41	4.3633e-40
DCN	215.659	-2.12542	0.15834	-13.4231	4.42521e-41	4.75425e-40
BRCA1	377.644	-1.61465	0.120319	-13.4197	4.63476e-41	4.97611e-40
RPS19	15755.1	-0.724428	0.0540119	-13.4124	5.11627e-41	5.48947e-40
IFI16	4452.56	-0.831078	0.0619771	-13.4094	5.32346e-41	5.70802e-40
KCNT2	489.941	-1.40684	0.104914	-13.4094	5.32961e-41	5.71085e-40
TYW3	911.435	-1.09309	0.0815175	-13.4093	5.33396e-41	5.71175e-40
CD47	7676.15	0.787697	0.0587472	13.4082	5.411e-41	5.79045e-40
C5orf56	149.217	-3.25106	0.242537	-13.4044	5.70002e-41	6.09573e-40
TXNIP	99731.5	0.63131	0.0471111	13.4005	6.0096e-41	6.42259e-40
CLIP4	5507.17	-0.824379	0.0615407	-13.3957	6.40959e-41	6.84558e-40
AHCYL2	3348.88	0.739675	0.0552264	13.3935	6.59981e-41	7.04412e-40
WDR26	15968.3	0.62361	0.0465764	13.389	7.01537e-41	7.48275e-40
CSE1L	6303.6	0.765688	0.0572157	13.3825	7.65554e-41	8.16024e-40
FBN1	308729	-0.990898	0.0740918	-13.3739	8.58842e-41	9.14863e-40
CRYAB	1417.04	-1.44424	0.108008	-13.3716	8.86061e-41	9.43241e-40
MTO1	1005.11	-1.04897	0.0785224	-13.3588	1.05183e-40	1.11897e-39
PEPD	3868.16	0.753161	0.056423	13.3485	1.20894e-40	1.28527e-39
RAB3IL1	167.24	-2.51317	0.188276	-13.3483	1.21133e-40	1.28698e-39
SNX15	1522.41	0.996522	0.0746598	13.3475	1.22469e-40	1.30032e-39
BTG1	6513.91	0.716907	0.053719	13.3455	1.25842e-40	1.33527e-39
BCAM	1716.89	-0.943943	0.0707928	-13.3339	1.47043e-40	1.55921e-39
PLS1	456.964	1.5702	0.11781	13.3283	1.58449e-40	1.67907e-39
MORN2	588.575	-1.28136	0.0961792	-13.3226	1.71014e-40	1.81104e-39
TUBB6	7316.39	-0.748071	0.0561582	-13.3208	1.75266e-40	1.85486e-39
STARD9	2203.29	1.01743	0.0764144	13.3147	1.90238e-40	2.012e-39
LRRC55	121.9	-3.06094	0.229972	-13.31	2.02403e-40	2.13928e-39
PLAUR	1089.68	-1.11646	0.0839112	-13.3053	2.15719e-40	2.27854e-39
IMPDH1	1843.57	-0.916817	0.0689122	-13.3041	2.1903e-40	2.31202e-39
LDB3	116.884	-3.83495	0.288308	-13.3016	2.26691e-40	2.39134e-39
POLR2L	3300.53	0.81783	0.0614924	13.2997	2.32401e-40	2.44998e-39
CYTH3	3292.98	0.768721	0.057834	13.2918	2.58121e-40	2.71936e-39
ZBTB7C	783.669	1.15747	0.0871443	13.2822	2.93647e-40	3.09164e-39
PCMT1	4771.91	0.769471	0.0579378	13.281	2.98458e-40	3.14026e-39
HEXB	7647.21	0.787596	0.0593477	13.2709	3.41607e-40	3.59194e-39
PLOD1	35651.6	-0.688454	0.051885	-13.2688	3.50978e-40	3.6881e-39
IGFBP7	2720.83	-0.974675	0.0734574	-13.2686	3.52175e-40	3.6983e-39
VCP	27587.8	0.657553	0.0495647	13.2666	3.61822e-40	3.79715e-39
GLIS2	3241.73	-0.872435	0.065816	-13.2557	4.18353e-40	4.38759e-39
KIAA1919	1122.35	1.00001	0.0754538	13.2532	4.32236e-40	4.53028e-39
PREX1	292.55	1.88831	0.142495	13.2518	4.40723e-40	4.61626e-39
OLFML2A	1633.89	-1.00965	0.0762982	-13.2329	5.66673e-40	5.93168e-39
LRP10	13924.1	-0.673822	0.0510005	-13.2121	7.47501e-40	7.81949e-39
AZI2	2458.53	-0.861869	0.0652361	-13.2115	7.5264e-40	7.8682e-39
FGFR1	29705.6	0.667459	0.0505403	13.2065	8.05264e-40	8.41294e-39
FOXRED2	1487.5	1.06794	0.0808998	13.2008	8.67916e-40	9.06169e-39
PKIA	4001.48	0.795662	0.0603045	13.1941	9.49183e-40	9.90384e-39
ATF5	1823.47	-0.970643	0.0735763	-13.1923	9.71297e-40	1.01281e-38
PPP2R1A	21042.7	0.684043	0.0519263	13.1733	1.24944e-39	1.302e-38
STXBP1	7610.87	0.755404	0.0573615	13.1692	1.32024e-39	1.37491e-38
MANF	3796.86	0.763464	0.057977	13.1684	1.33422e-39	1.38857e-38
KIAA1462	1576.03	-0.991052	0.0752659	-13.1673	1.35295e-39	1.40717e-38
NAGPA	399.68	-1.61873	0.122998	-13.1606	1.47894e-39	1.53723e-38
PLOD2	91326.2	0.72737	0.055293	13.1548	1.59662e-39	1.65849e-38
G0S2	94.4217	-4.28114	0.325529	-13.1514	1.67158e-39	1.73525e-38
G3BP1	13484.1	0.693161	0.052746	13.1415	1.90452e-39	1.97581e-38
ACSF2	469.764	-1.52104	0.115757	-13.14	1.94231e-39	2.01372e-38
IQGAP2	1625.33	0.951014	0.0723769	13.1397	1.94874e-39	2.01911e-38
ATP6V0B	4817.61	0.786328	0.0598531	13.1376	2.00426e-39	2.07532e-38
PIR	309.804	-1.67288	0.127403	-13.1306	2.20024e-39	2.27679e-38
CCDC85C	2731.89	0.792499	0.060389	13.1232	2.42385e-39	2.50659e-38
GPR56	1316.96	-1.06783	0.0813717	-13.1229	2.43559e-39	2.51713e-38
COL5A1	323291	-0.907991	0.0692261	-13.1163	2.65564e-39	2.74281e-38
TMEM144	136.161	-2.73271	0.208479	-13.1078	2.97051e-39	3.06608e-38
SELRC1	596.417	-1.23558	0.0942724	-13.1065	3.02352e-39	3.11882e-38
CDH11	7643.34	-0.785252	0.059925	-13.1039	3.12731e-39	3.22384e-38
MYD88	704.76	-1.231	0.0939492	-13.1028	3.17332e-39	3.2692e-38
SH3RF2	623.436	-1.26495	0.0965519	-13.1013	3.23775e-39	3.33347e-38
ICAM1	285.255	-1.97947	0.15112	-13.0987	3.34802e-39	3.44483e-38
GIT1	4407.83	0.751304	0.0573748	13.0947	3.53173e-39	3.63156e-38
TIAM1	1473.53	1.14239	0.0872764	13.0894	3.78698e-39	3.89157e-38
CDC42EP5	139.55	-6.65793	0.508766	-13.0864	3.93684e-39	4.04302e-38
KDELC1	2009.36	0.876458	0.0669772	13.0859	3.96357e-39	4.0679e-38
PLS3	14201.9	-0.648458	0.0495879	-13.0769	4.46024e-39	4.57476e-38
PPA1	5080.6	0.669564	0.0512321	13.0692	4.9359e-39	5.05945e-38
PACSIN3	388.881	-1.70203	0.130268	-13.0657	5.17337e-39	5.29953e-38
ANKRD50	5352.25	0.750849	0.0574743	13.0641	5.28067e-39	5.40605e-38
PABPC4	14155.5	0.576102	0.0441185	13.0581	5.71675e-39	5.84881e-38
SELM	1905.18	-0.827724	0.0634063	-13.0543	6.00701e-39	6.14192e-38
TSC22D2	6960.74	0.703618	0.053933	13.0461	6.68427e-39	6.83011e-38
GSR	2882.03	0.852686	0.0653826	13.0415	7.10673e-39	7.25723e-38
CHMP7	4241.88	0.675275	0.051796	13.0372	7.5176e-39	7.672e-38
C22orf46	1428.16	-1.08329	0.0831761	-13.024	8.93103e-39	9.10875e-38
SH3GL2	473.792	1.51615	0.116422	13.0229	9.06536e-39	9.23997e-38
ERMP1	2293.49	0.84949	0.0652526	13.0185	9.60547e-39	9.78437e-38
AS3MT	287.453	-1.77715	0.136527	-13.0169	9.81161e-39	9.98811e-38
TNFSF10	92.1002	-4.4696	0.343735	-13.0031	1.17531e-38	1.19571e-37
SSC5D	7336.02	-1.83686	0.141276	-13.0019	1.19317e-38	1.21312e-37
HES6	295.869	1.73219	0.133252	12.9993	1.23392e-38	1.25377e-37
NADK	4008.32	0.67943	0.0522938	12.9925	1.34879e-38	1.36963e-37
SFXN5	2975.24	0.786365	0.0605514	12.9867	1.45507e-38	1.47664e-37
GREM1	97.8284	-3.55255	0.273695	-12.9799	1.59039e-38	1.61296e-37
KIF16B	649.755	-1.28737	0.0992005	-12.9775	1.64149e-38	1.66375e-37
NABP2	1422.58	-0.961904	0.0741325	-12.9755	1.68545e-38	1.70723e-37
SCMH1	1898.94	-0.804472	0.0620038	-12.9746	1.70568e-38	1.72665e-37
PLEKHF1	243.648	-1.92015	0.148001	-12.9739	1.72048e-38	1.74056e-37
ARHGAP22	409.308	-1.49236	0.115042	-12.9723	1.75791e-38	1.77732e-37
PTPRZ1	978.674	-1.0407	0.0802525	-12.9678	1.86379e-38	1.88321e-37
AJUBA	3464.9	-0.774732	0.0597994	-12.9555	2.18666e-38	2.20806e-37
DNAJC22	291.466	-1.89842	0.146542	-12.9548	2.20814e-38	2.22837e-37
PLXDC2	11343.6	-0.7897	0.0609941	-12.9471	2.43857e-38	2.4594e-37
CLIC1	12485.5	-0.591669	0.0456995	-12.947	2.44471e-38	2.46407e-37
PTCHD2	260.108	2.02177	0.156214	12.9424	2.59559e-38	2.61452e-37
SLC22A5	338.12	-1.58911	0.122784	-12.9423	2.59743e-38	2.61476e-37
MMP14	91952.4	-0.812754	0.0628098	-12.9399	2.67865e-38	2.69485e-37
PIK3R2	7239.75	0.737288	0.0570078	12.9331	2.92769e-38	2.94358e-37
FLJ27365	1090.76	1.09021	0.0843399	12.9264	3.19351e-38	3.20887e-37
RCHY1	1282.08	-1.03389	0.0799927	-12.9248	3.26291e-38	3.27658e-37
FN3KRP	2353.68	0.807118	0.0624746	12.9191	3.51022e-38	3.52275e-37
TOR1B	3125.61	0.809634	0.0626817	12.9166	3.62885e-38	3.63957e-37
SENP1	1240.74	-0.997073	0.0772731	-12.9032	4.3152e-38	4.32529e-37
CDKN2AIP	1337.15	0.994152	0.0770577	12.9014	4.42063e-38	4.42824e-37
SOCS3	4532.33	0.792123	0.0614038	12.9002	4.48824e-38	4.4932e-37
RAB11FIP5	4116.71	-0.716588	0.0555624	-12.897	4.67997e-38	4.68227e-37
FAM214B	3711.92	-0.67804	0.052638	-12.8812	5.74506e-38	5.74435e-37
COL4A2	161394	0.806195	0.0625879	12.881	5.75825e-38	5.75402e-37
MARS2	628.908	1.42347	0.110526	12.8791	5.90539e-38	5.89743e-37
HIST1H2AG	111.71	3.32374	0.258099	12.8778	6.00105e-38	5.98929e-37
TLR4	442.396	-1.56869	0.12182	-12.8772	6.04908e-38	6.03354e-37
RNF208	271.379	-1.75508	0.136431	-12.8642	7.15332e-38	7.13057e-37
CYFIP2	9985.7	0.635624	0.049413	12.8635	7.22209e-38	7.19472e-37
TMEM8A	2707.77	0.81422	0.0633121	12.8604	7.51575e-38	7.48269e-37
SNUPN	760.922	-1.13305	0.0881203	-12.858	7.75189e-38	7.71308e-37
AGTRAP	473.293	-1.58272	0.123144	-12.8526	8.32101e-38	8.2743e-37
HOMER1	2605.3	0.904269	0.070374	12.8495	8.6596e-38	8.60574e-37
PGAP1	5277.63	0.776952	0.0604759	12.8473	8.90666e-38	8.84587e-37
MAPKAPK3	1068.01	-1.04976	0.0817164	-12.8463	9.02055e-38	8.95353e-37
MRPL11	764.663	-1.11241	0.0865988	-12.8455	9.11617e-38	9.04292e-37
TCN2	355.671	-1.61434	0.125681	-12.8447	9.20581e-38	9.12629e-37
CYTH1	2023.13	0.787171	0.061299	12.8415	9.59964e-38	9.51094e-37
ADAMTS10	1078.4	-1.10609	0.0862535	-12.8237	1.20772e-37	1.19583e-36
LIFR	10008.3	0.632316	0.0493627	12.8096	1.44928e-37	1.43415e-36
ALOX5AP	87.8308	-4.25794	0.332495	-12.806	1.51739e-37	1.50063e-36
MDK	8836.94	-0.703657	0.054957	-12.8038	1.56165e-37	1.54347e-36
AHCTF1	4118.38	0.719868	0.0562588	12.7957	1.73374e-37	1.71252e-36
BSN	2309.58	0.963314	0.0752888	12.7949	1.75057e-37	1.72809e-36
NNT	3432.3	-0.748126	0.058488	-12.7911	1.83859e-37	1.81389e-36
RIPK2	1056.05	0.979832	0.076605	12.7907	1.84779e-37	1.82186e-36
PRAF2	2182.57	0.834887	0.0652778	12.7898	1.87053e-37	1.84316e-36
PEX11A	296.969	-1.65935	0.129762	-12.7877	1.92186e-37	1.8926e-36
GREB1L	1003.79	1.11026	0.0868648	12.7814	2.08159e-37	2.04866e-36
PRDX1	18367.7	0.611414	0.0478518	12.7772	2.19769e-37	2.16162e-36
PIGH	818.944	1.18273	0.0925842	12.7746	2.27183e-37	2.23319e-36
LRRC8C	411.976	1.57852	0.123609	12.7702	2.40539e-37	2.36305e-36
LRRC8A	9044.62	0.676944	0.0530197	12.7678	2.4807e-37	2.43557e-36
MTHFD1L	4738.24	-0.751944	0.0589442	-12.7569	2.85347e-37	2.79987e-36
SYK	107.405	-3.25527	0.255181	-12.7567	2.86049e-37	2.80507e-36
GABRB2	243.293	-1.8522	0.145209	-12.7554	2.91037e-37	2.85227e-36
VRK2	512.045	-1.29628	0.101638	-12.7539	2.9662e-37	2.90524e-36
UBB	27956.1	0.635403	0.049837	12.7496	3.13223e-37	3.06601e-36
SKP1	10147.3	0.674655	0.0529289	12.7464	3.26268e-37	3.19179e-36
LAMA1	503.66	1.34965	0.105918	12.7424	3.43541e-37	3.35875e-36
APH1B	640.666	-1.23822	0.0971937	-12.7397	3.55622e-37	3.47477e-36
SRSF7	3849.57	0.679085	0.0533114	12.7381	3.63272e-37	3.5474e-36
PPP6R3	6749.99	0.692625	0.0543961	12.733	3.87696e-37	3.78364e-36
CSGALNACT1	563.879	-1.24017	0.0974095	-12.7315	3.95004e-37	3.85265e-36
INTS8	2431.4	0.827295	0.0649861	12.7303	4.01107e-37	3.90984e-36
LPAR1	190.715	-2.32868	0.182956	-12.7281	4.12807e-37	4.02148e-36
HMGB2	3079.89	-0.77368	0.0607917	-12.7267	4.20079e-37	4.08988e-36
SGPL1	9300.98	-0.766859	0.0602637	-12.7251	4.29097e-37	4.17517e-36
RIN3	105.69	-3.33053	0.2618	-12.7216	4.48351e-37	4.35992e-36
KIAA1211	5233	0.713651	0.0560993	12.7212	4.50779e-37	4.38091e-36
VPS26B	6148.55	0.623806	0.0490381	12.7209	4.52886e-37	4.39877e-36
DLX1	1313.16	0.979806	0.0770761	12.7122	5.05989e-37	4.91162e-36
SCAMP2	3357.83	0.786364	0.0618717	12.7096	5.23124e-37	5.07492e-36
IKBKE	118.998	-2.94085	0.231436	-12.707	5.40735e-37	5.24266e-36
PCDH10	1206.27	1.09144	0.0859629	12.6966	6.17233e-37	5.98077e-36
PAM	71151.6	0.655792	0.0516682	12.6924	6.51857e-37	6.31251e-36
S100A2	141.549	-2.56461	0.202163	-12.6858	7.08414e-37	6.85614e-36
ENOSF1	1204.17	-1.25106	0.0986469	-12.6822	7.4232e-37	7.18002e-36
NAB2	2920.61	0.793522	0.0625765	12.6808	7.55265e-37	7.30089e-36
PPAP2A	3787.56	-0.73879	0.0582662	-12.6796	7.67673e-37	7.41644e-36
SFXN4	409.105	-1.41886	0.111916	-12.6778	7.84658e-37	7.57604e-36
TIMP2	37576	-0.709153	0.055942	-12.6766	7.97385e-37	7.69436e-36
RNF207	220.983	-2.24012	0.176743	-12.6745	8.19078e-37	7.89902e-36
DMXL2	3427.69	0.861551	0.0680055	12.6688	8.79976e-37	8.48128e-36
PPP3CB	5886.66	0.6178	0.04878	12.665	9.24114e-37	8.90143e-36
JAK1	17991.9	0.615378	0.0486158	12.658	1.01078e-36	9.73051e-36
PRND	110.728	-2.99487	0.236686	-12.6533	1.07237e-36	1.03173e-35
CEP78	1583.09	0.853517	0.0675371	12.6378	1.3074e-36	1.25711e-35
IL4R	468.696	-1.34393	0.106348	-12.637	1.31988e-36	1.26836e-35
PAPD5	1830.99	0.84007	0.066484	12.6357	1.34246e-36	1.2893e-35
ZP4	99.1289	-3.36828	0.26669	-12.6299	1.44387e-36	1.38588e-35
TOX2	597.199	-1.43425	0.113571	-12.6287	1.46691e-36	1.40717e-35
MRAS	4478.38	-0.666525	0.0527809	-12.6282	1.47684e-36	1.41585e-35
ABCD3	5182.61	0.688583	0.0545463	12.6238	1.56048e-36	1.49516e-35
KIAA1430	3078.19	-0.854515	0.0677212	-12.6181	1.67737e-36	1.60621e-35
CYP46A1	504.971	1.37757	0.109251	12.6092	1.87791e-36	1.7972e-35
ID3	2120.95	0.878771	0.0697127	12.6056	1.96678e-36	1.88114e-35
PIP4K2A	7372.79	0.689044	0.0546679	12.6042	2.00241e-36	1.9141e-35
DENND4A	3235.85	0.711439	0.0564491	12.6032	2.02735e-36	1.9368e-35
MAPKAPK2	7365.61	0.667549	0.0529678	12.6029	2.03481e-36	1.94278e-35
TMEM245	9058.84	0.697758	0.0553705	12.6016	2.0687e-36	1.97399e-35
SPOCK1	50848.8	0.73107	0.0580263	12.5989	2.13996e-36	2.04079e-35
PLP2	5216.95	-0.723875	0.0574601	-12.5979	2.16877e-36	2.06705e-35
EXOC6	847.652	1.10299	0.0875961	12.5917	2.34491e-36	2.23363e-35
PLIN3	3439.77	-0.708192	0.0562555	-12.5889	2.43187e-36	2.31511e-35
RGS11	144.246	-3.03496	0.241107	-12.5876	2.47064e-36	2.35064e-35
GABRA5	251.701	-1.8726	0.148801	-12.5846	2.56679e-36	2.4407e-35
SP110	385.306	-1.61311	0.128219	-12.5809	2.68904e-36	2.55545e-35
WNK1	51108	-0.724103	0.0575784	-12.576	2.86336e-36	2.71952e-35
ELMOD3	691.23	-1.20859	0.0961997	-12.5633	3.35905e-36	3.18846e-35
SBF1	10358	0.672375	0.0535288	12.561	3.4597e-36	3.28209e-35
ACOX2	93.9377	-3.82229	0.304347	-12.559	3.54834e-36	3.36421e-35
MTMR11	671.913	-1.33941	0.106689	-12.5543	3.76625e-36	3.56874e-35
FZD1	5005.46	0.64349	0.0512666	12.5518	3.88436e-36	3.67851e-35
NOV	948.173	-1.25477	0.0999702	-12.5514	3.90387e-36	3.69485e-35
AMFR	8023.64	0.704376	0.0561228	12.5506	3.94448e-36	3.73112e-35
SMAP2	3418.77	0.718614	0.0572715	12.5475	4.10344e-36	3.87923e-35
RYBP	4507.03	0.737524	0.0588147	12.5398	4.52283e-36	4.27322e-35
ZBTB18	3584.24	0.75651	0.0603309	12.5394	4.54667e-36	4.29326e-35
DIRAS1	1736.17	-0.813718	0.064916	-12.5349	4.80733e-36	4.53676e-35
DNM2	7495.67	0.592476	0.0472992	12.5261	5.37234e-36	5.06704e-35
MPRIP	16310.7	0.58803	0.0469549	12.5233	5.56819e-36	5.24872e-35
MYLIP	593.136	1.2384	0.0989498	12.5155	6.14336e-36	5.78754e-35
ZNF697	2366.68	0.778424	0.0622115	12.5125	6.37531e-36	6.00259e-35
NOP56	5132.51	0.640752	0.0512439	12.504	7.10139e-36	6.68236e-35
BZW1	15746.9	0.590418	0.0472191	12.5038	7.11638e-36	6.6926e-35
PLCD4	314.952	-1.75266	0.140175	-12.5034	7.15556e-36	6.72557e-35
SPG20	3936.35	-0.749647	0.0599654	-12.5013	7.34153e-36	6.89638e-35
PPP1R10	4968.89	0.662054	0.0529784	12.4967	7.78469e-36	7.30846e-35
HMGN1	15708.3	0.709177	0.0567733	12.4914	8.31941e-36	7.80598e-35
SFXN3	6074.73	0.649345	0.0519897	12.4899	8.47806e-36	7.95026e-35
KCTD13	1332.3	0.979755	0.0784921	12.4822	9.33637e-36	8.75009e-35
AGAP2-AS1	305.671	-1.59929	0.128134	-12.4814	9.4328e-36	8.83539e-35
CTSH	669.863	-1.17887	0.0944581	-12.4803	9.56131e-36	8.95061e-35
NSG2	1608.99	-1.04979	0.0841214	-12.4794	9.6656e-36	9.04305e-35
NEK11	151.618	-2.45572	0.196893	-12.4724	1.05642e-35	9.87812e-35
IFI35	157.457	-2.42343	0.194321	-12.4713	1.07052e-35	1.00042e-34
CRK	9716.1	0.60957	0.0488881	12.4687	1.10628e-35	1.03325e-34
PSKH1	3641.53	0.754054	0.0604764	12.4686	1.10804e-35	1.0343e-34
MT1F	222.464	1.88005	0.150854	12.4627	1.19241e-35	1.11241e-34
PNPLA3	430.072	-1.33569	0.107228	-12.4565	1.28912e-35	1.20195e-34
CCDC88C	485.199	1.31182	0.105313	12.4564	1.29112e-35	1.20313e-34
TEAD1	24610.7	0.594221	0.0477121	12.4543	1.32488e-35	1.23388e-34
ZNF664	16413.2	0.681284	0.0547568	12.442	1.54602e-35	1.43901e-34
CDO1	529.219	1.35388	0.108851	12.4379	1.62693e-35	1.51345e-34
TAC1	2476.53	-0.871887	0.0701505	-12.4288	1.82327e-35	1.69513e-34
POLG	2861.47	0.893983	0.0719336	12.4279	1.84437e-35	1.71377e-34
SAMD11	1554.52	0.990918	0.0797475	12.4257	1.89601e-35	1.76075e-34
CAPN5	4990.2	0.775423	0.0624188	12.4229	1.96263e-35	1.82158e-34
NBEA	3050.65	0.784292	0.0631499	12.4195	2.04748e-35	1.89925e-34
OSCAR	93.3533	-3.73681	0.300887	-12.4193	2.0528e-35	1.9031e-34
SMPD1	8095.77	0.689032	0.0555065	12.4135	2.20692e-35	2.04482e-34
PANX2	153.313	-2.37693	0.1915	-12.4121	2.24573e-35	2.0796e-34
PHF15	270.934	-1.81848	0.146529	-12.4104	2.29523e-35	2.12423e-34
SCGN	99.0704	-3.60122	0.290197	-12.4095	2.31985e-35	2.14579e-34
TMTC1	6611.49	0.740638	0.0597225	12.4013	2.57028e-35	2.37609e-34
RCN1	11536.1	-0.835315	0.0673629	-12.4002	2.60563e-35	2.4074e-34
BSCL2	5197.03	0.665446	0.0537043	12.3909	2.92642e-35	2.70225e-34
COL4A5	9354.28	-0.693153	0.0559613	-12.3863	3.10053e-35	2.8614e-34
AFF3	4192.85	-0.769166	0.062126	-12.3807	3.32248e-35	3.06451e-34
PLK3	1475.56	0.958908	0.0774777	12.3766	3.50045e-35	3.22683e-34
PKN1	3582.29	-0.711499	0.0575712	-12.3586	4.37707e-35	4.03264e-34
HMGB3	4313.98	0.722477	0.0584597	12.3585	4.38047e-35	4.0335e-34
VASH1	4446.8	0.652282	0.0527897	12.3562	4.50845e-35	4.14899e-34
INPP5F	11351.3	0.721501	0.0583938	12.3558	4.53341e-35	4.16961e-34
C12orf49	3605.92	0.674443	0.0546235	12.3471	5.04865e-35	4.64088e-34
APEH	3004.02	0.678975	0.0549987	12.3453	5.16486e-35	4.74503e-34
CSMD2	2626.18	0.98896	0.0801293	12.3421	5.37629e-35	4.9365e-34
GALNT11	4268.52	0.729608	0.0591177	12.3416	5.40491e-35	4.95998e-34
BIVM	897.874	-1.1315	0.0916859	-12.3411	5.44236e-35	4.99154e-34
LRRC41	3228.03	-0.75992	0.0616003	-12.3363	5.77545e-35	5.29405e-34
AGT	152.219	-2.30419	0.186992	-12.3224	6.86352e-35	6.28789e-34
STAU1	10583.5	0.596456	0.0484122	12.3204	7.03881e-35	6.44486e-34
TOLLIP	4127.38	0.681587	0.055327	12.3192	7.13563e-35	6.52985e-34
NRIP3	1016.82	0.945258	0.0767645	12.3137	7.6399e-35	6.98738e-34
SOX12	4440.89	-0.727756	0.0591065	-12.3126	7.74579e-35	7.08025e-34
HNRNPUL2	19208.6	0.639391	0.0519688	12.3034	8.68707e-35	7.9362e-34
OSMR	18222.8	0.797965	0.0648679	12.3014	8.90459e-35	8.13036e-34
ZDHHC14	1173.48	0.906159	0.0736681	12.3006	8.9945e-35	8.20786e-34
KLHDC7B	104.935	-6.1047	0.496429	-12.2972	9.37532e-35	8.55058e-34
GRIN2D	145.409	-2.47379	0.201248	-12.2922	9.97465e-35	9.09211e-34
EIF4A1	36666.5	0.553343	0.0450194	12.2912	1.00982e-34	9.19957e-34
MARK2	3528.88	0.720712	0.0586535	12.2876	1.0555e-34	9.61032e-34
ROBO3	160.619	-2.40616	0.195861	-12.285	1.09013e-34	9.92015e-34
RAB34	1759.58	-0.81492	0.0663611	-12.2801	1.15862e-34	1.05375e-33
MFAP2	8654.21	-0.628012	0.0511585	-12.2758	1.22154e-34	1.11035e-33
MYCBP2	13991.8	0.786144	0.0640626	12.2715	1.28849e-34	1.17055e-33
NUP188	4354.04	0.84589	0.0689619	12.2661	1.37811e-34	1.25128e-33
ZMYND8	2792.79	-0.744452	0.0606959	-12.2653	1.39146e-34	1.2627e-33
TGFBI	285722	-0.697743	0.0568974	-12.2632	1.42776e-34	1.29492e-33
MPP2	1474.19	-0.901405	0.0735193	-12.2608	1.47034e-34	1.33279e-33
ARHGEF19	182.452	-2.11395	0.172494	-12.2552	1.57525e-34	1.42709e-33
NARS	12089.5	-0.684787	0.0558836	-12.2538	1.60307e-34	1.45149e-33
MICU2	3165.67	0.773057	0.0631041	12.2505	1.66958e-34	1.51087e-33
GABRG3	491.613	-1.33016	0.108628	-12.2451	1.78546e-34	1.61484e-33
CASC5	195.795	2.00233	0.163531	12.2443	1.80148e-34	1.62843e-33
NKAIN4	146.016	-2.51955	0.205828	-12.2411	1.87529e-34	1.6942e-33
LURAP1L	161.522	-2.29836	0.18795	-12.2286	2.1876e-34	1.97526e-33
PPP2R4	9454.92	-0.647523	0.0529541	-12.228	2.20258e-34	1.98769e-33
PC	747.403	1.04186	0.0852195	12.2256	2.26875e-34	2.04627e-33
PLXNA1	12443.3	0.697968	0.0570911	12.2255	2.27145e-34	2.04757e-33
RAB11A	9671.42	0.626661	0.0512848	12.2192	2.45408e-34	2.21098e-33
CACHD1	2908.98	0.836188	0.0684777	12.2111	2.71201e-34	2.44201e-33
BAG4	2324.47	0.894591	0.0733518	12.1959	3.2692e-34	2.9421e-33
CUEDC2	1761.76	-0.821433	0.0673603	-12.1946	3.32043e-34	2.98655e-33
FGFR2	719.584	-1.07729	0.0883855	-12.1885	3.5775e-34	3.216e-33
NLRP1	86.3875	-3.63578	0.298326	-12.1873	3.63311e-34	3.26419e-33
ADAMTS15	1972.67	0.869032	0.0713087	12.1869	3.64986e-34	3.27563e-33
PITRM1	5509.68	0.67617	0.0554831	12.1869	3.64869e-34	3.27563e-33
ABR	5552.59	-0.646156	0.0530291	-12.1849	3.73955e-34	3.35428e-33
ALS2	4772.82	0.63918	0.0524659	12.1828	3.84061e-34	3.44138e-33
GMNN	529.468	1.23088	0.101035	12.1828	3.84088e-34	3.44138e-33
TAF4	1421.91	0.947276	0.0777894	12.1775	4.0989e-34	3.67054e-33
SEMA3E	504.891	-1.38219	0.113518	-12.1759	4.17595e-34	3.73749e-33
UBE2I	7307.92	0.599961	0.0492886	12.1724	4.36034e-34	3.90037e-33
OCEL1	725.722	1.09514	0.0899785	12.1711	4.42959e-34	3.96014e-33
EMP1	3304.09	0.83947	0.0689899	12.168	4.60163e-34	4.11169e-33
ZNF573	203.485	-1.98965	0.163541	-12.1661	4.71031e-34	4.2065e-33
C6orf106	6441.82	0.594818	0.0488979	12.1645	4.80383e-34	4.28767e-33
FAH	655.471	-1.27795	0.105059	-12.164	4.83194e-34	4.3104e-33
TBC1D14	5366.34	0.605524	0.0497823	12.1634	4.86653e-34	4.33888e-33
BASP1	23437.2	0.738803	0.0607593	12.1595	5.10607e-34	4.54996e-33
CAMK2D	10499.4	0.693348	0.0570352	12.1565	5.29851e-34	4.71886e-33
DLC1	5843.66	0.636439	0.0523589	12.1553	5.37464e-34	4.78404e-33
WNK4	256.078	1.71142	0.140845	12.1511	5.65948e-34	5.03484e-33
AXL	4568.85	-0.655902	0.054006	-12.145	6.09975e-34	5.42355e-33
COL5A2	118909	-0.746795	0.0614918	-12.1446	6.12667e-34	5.44452e-33
MDM2	22986.2	-0.66698	0.0549206	-12.1444	6.13949e-34	5.45293e-33
KIAA0226	3047.91	0.773107	0.0636625	12.1439	6.18432e-34	5.48976e-33
RRP1B	3961.56	0.749916	0.0618128	12.1321	7.1428e-34	6.33714e-33
SAMD10	238.172	-1.75528	0.144699	-12.1306	7.27389e-34	6.44994e-33
CXCR4	338.721	1.55968	0.128607	12.1275	7.55467e-34	6.69527e-33
SELT	6666.18	0.734486	0.0605775	12.1247	7.81257e-34	6.92007e-33
UBTD2	4736.14	0.692707	0.0571545	12.1199	8.28497e-34	7.33451e-33
MMACHC	250.205	-1.6946	0.139869	-12.1156	8.729e-34	7.72342e-33
KIDINS220	23338.7	0.632402	0.0522009	12.1148	8.82063e-34	7.80025e-33
IPO8	3785.75	-0.734511	0.0606452	-12.1116	9.16771e-34	8.10278e-33
CUL7	3111.72	-0.765064	0.0631722	-12.1108	9.26263e-34	8.18224e-33
NFIB	6696.74	0.827736	0.0683512	12.11	9.34555e-34	8.25101e-33
STPG1	294.409	-1.5623	0.129045	-12.1066	9.73969e-34	8.59434e-33
SH3RF1	2656.49	0.682807	0.0564042	12.1056	9.8627e-34	8.69817e-33
ID4	2466.38	0.920257	0.0761002	12.0927	1.15429e-33	1.01744e-32
ELAVL3	3515.04	0.801719	0.0663079	12.0908	1.18067e-33	1.04013e-32
ZNRF1	2622.17	0.706634	0.0584442	12.0907	1.18225e-33	1.04097e-32
USP46	3580.9	-0.679366	0.0562088	-12.0865	1.24525e-33	1.09584e-32
FAM102A	4860.07	0.648135	0.0536251	12.0864	1.24599e-33	1.09591e-32
MAP1B	236525	0.816056	0.0675237	12.0855	1.26046e-33	1.10804e-32
PSMB9	123.436	-2.59005	0.214324	-12.0848	1.27151e-33	1.11715e-32
PPIL3	1201.18	-0.998048	0.0825911	-12.0842	1.27998e-33	1.12399e-32
TRAPPC9	2021.77	0.804767	0.0666017	12.0833	1.29445e-33	1.13608e-32
COL4A4	176.469	-2.44084	0.202038	-12.0811	1.32999e-33	1.16664e-32
CACUL1	6457.18	0.682204	0.0565442	12.065	1.61709e-33	1.41771e-32
PDCD4	4563.09	-0.728476	0.0604127	-12.0583	1.75322e-33	1.53624e-32
ATP1A2	84.0257	-3.75062	0.311101	-12.056	1.80433e-33	1.58017e-32
ZBTB2	685.486	-1.06075	0.0879937	-12.0548	1.82929e-33	1.60117e-32
RCOR3	3613.75	-0.696936	0.0578314	-12.0512	1.91185e-33	1.67253e-32
GPX3	784.393	1.2707	0.105444	12.0509	1.91746e-33	1.67654e-32
C4A	222.487	-1.85369	0.153892	-12.0454	2.05081e-33	1.79217e-32
SMOC2	254.616	-1.84545	0.153267	-12.0407	2.17034e-33	1.89561e-32
ACTC1	4798.97	-0.962311	0.079927	-12.0399	2.19272e-33	1.91414e-32
TMEM54	227.17	-1.82478	0.151576	-12.0387	2.22502e-33	1.94129e-32
HDAC3	3546.56	0.732377	0.0609572	12.0146	2.97766e-33	2.59657e-32
ARHGDIA	24718.5	0.622586	0.0518242	12.0134	3.02148e-33	2.63337e-32
UBA1	19778.1	0.633414	0.0527272	12.013	3.03519e-33	2.64391e-32
HK2	5205.68	0.64911	0.0540562	12.0081	3.22279e-33	2.80583e-32
DOK4	1244.6	-0.918342	0.0764874	-12.0064	3.28666e-33	2.8599e-32
MEGF6	106.544	-2.83726	0.236359	-12.004	3.38487e-33	2.94379e-32
SYNJ1	2462.87	0.739934	0.0616579	12.0006	3.52587e-33	3.06478e-32
SPTBN5	277.193	-2.00574	0.167215	-11.9949	3.77688e-33	3.28121e-32
CHTF18	423.364	1.52967	0.127534	11.9942	3.81052e-33	3.30867e-32
ARHGAP23	4495.35	-0.620517	0.0517554	-11.9894	4.03716e-33	3.5036e-32
CNTNAP4	212.354	-2.07691	0.173257	-11.9875	4.13385e-33	3.5856e-32
SLX4	1916.37	0.816131	0.068088	11.9864	4.18646e-33	3.6293e-32
ANKH	1096.07	-0.89829	0.0749753	-11.9811	4.46175e-33	3.8659e-32
NSMCE1	1374.24	-0.841949	0.0702821	-11.9796	4.54764e-33	3.93822e-32
AP1S1	3482.01	-0.689941	0.0576002	-11.9781	4.62824e-33	4.0059e-32
NSMAF	2024.93	-0.726896	0.0606927	-11.9767	4.70827e-33	4.07301e-32
RDH10	1497.86	-0.883912	0.073808	-11.9758	4.75658e-33	4.11262e-32
OPLAH	166.749	-2.23941	0.187039	-11.973	4.92219e-33	4.25355e-32
AXIN2	550.405	1.2014	0.100384	11.968	5.22778e-33	4.51523e-32
CLIP2	4789.71	0.629313	0.0525837	11.9678	5.23827e-33	4.52189e-32
DOT1L	2229.58	0.811293	0.0677946	11.9669	5.29526e-33	4.56867e-32
GMPR2	1522.02	-0.809891	0.0676801	-11.9665	5.32542e-33	4.59226e-32
ALDH1A3	179.305	-1.98608	0.165975	-11.9662	5.34415e-33	4.60597e-32
VAMP5	940.842	-0.934991	0.0781447	-11.9649	5.42854e-33	4.67623e-32
FBXW4	786.687	-1.11263	0.0930066	-11.9629	5.55925e-33	4.7863e-32
MTM1	920.584	0.980116	0.0819545	11.9593	5.8071e-33	4.99705e-32
FIGN	975.228	-0.938479	0.0784799	-11.9582	5.88186e-33	5.05871e-32
PARP12	178.789	-2.08689	0.17463	-11.9504	6.4614e-33	5.55422e-32
MYO5C	206.907	-2.00451	0.167757	-11.9489	6.58208e-33	5.65496e-32
EPHB4	2549.47	-0.819083	0.0685622	-11.9466	6.76668e-33	5.8105e-32
CASP7	1041.63	-0.889101	0.0744487	-11.9425	7.1083e-33	6.10063e-32
SPEN	8804.2	0.839959	0.0703804	11.9345	7.8181e-33	6.70629e-32
GPC2	1907.12	0.905832	0.0759032	11.934	7.86611e-33	6.74392e-32
IGFBP4	216.589	-1.80162	0.150969	-11.9337	7.89591e-33	6.7659e-32
RFTN2	78.7835	-3.96321	0.33216	-11.9316	8.09816e-33	6.93557e-32
FAM134C	3819.86	0.682096	0.0571802	11.9289	8.36865e-33	7.16346e-32
TMEM87A	5494.95	0.666405	0.0558742	11.9269	8.57212e-33	7.33377e-32
PI4K2A	3903.03	0.658232	0.0552156	11.9211	9.18544e-33	7.85437e-32
ARHGAP29	922.557	1.02123	0.0856907	11.9176	9.57771e-33	8.1855e-32
LMBRD1	2518.98	-0.84874	0.0712291	-11.9156	9.81171e-33	8.38109e-32
ORC4	2292.27	0.757874	0.0636207	11.9124	1.02009e-32	8.709e-32
ARHGEF4	352.25	-1.44468	0.12132	-11.9081	1.07423e-32	9.1664e-32
GLIPR2	5955.18	0.58781	0.0494135	11.8957	1.2453e-32	1.06206e-31
GNPTG	2556.69	0.692379	0.0582214	11.8922	1.29991e-32	1.10805e-31
HEATR3	1493.18	0.802153	0.0674589	11.891	1.31846e-32	1.12327e-31
KIAA0930	6665.53	0.563142	0.0473604	11.8906	1.32492e-32	1.12819e-31
ZFP64	888.164	-0.992902	0.0835216	-11.888	1.36702e-32	1.16343e-31
AMZ2	3729.5	-0.623834	0.0524953	-11.8836	1.43991e-32	1.22483e-31
RECK	2205.08	0.737593	0.0620714	11.883	1.45085e-32	1.23349e-31
NRARP	159.808	2.15404	0.181292	11.8816	1.47494e-32	1.25331e-31
FBXO33	1268.02	0.973241	0.0819481	11.8763	1.57155e-32	1.33472e-31
MFSD12	3830.84	0.743687	0.0626201	11.8762	1.57396e-32	1.33606e-31
PIKFYVE	5344.19	0.602946	0.0507757	11.8747	1.60204e-32	1.35919e-31
GRIA3	1909.63	0.756937	0.0637704	11.8697	1.70021e-32	1.44173e-31
SMC2	1200.54	-0.977231	0.0823596	-11.8654	1.79024e-32	1.51728e-31
STMN1	9340.74	0.771858	0.0650917	11.858	1.9556e-32	1.65657e-31
LYSMD1	550.478	-1.25733	0.106083	-11.8523	2.09274e-32	1.77181e-31
CDH20	136.25	-2.95861	0.249712	-11.8481	2.20063e-32	1.8622e-31
PLEKHA8	3188.62	0.657139	0.0554887	11.8428	2.34598e-32	1.98416e-31
LPHN3	2402.13	0.814094	0.0687547	11.8406	2.40829e-32	2.0358e-31
SPAG7	3338.79	0.643887	0.0543985	11.8365	2.52788e-32	2.13579e-31
GSDMD	264.663	-1.70972	0.144448	-11.8362	2.53648e-32	2.14195e-31
FARP1	11425.1	0.610561	0.0515905	11.8348	2.58088e-32	2.17831e-31
SMARCAL1	1172.83	-0.878622	0.0742567	-11.8322	2.6601e-32	2.24401e-31
CANT1	5547.19	0.593995	0.0502172	11.8285	2.78017e-32	2.34409e-31
AMD1	3662.77	0.740857	0.0626748	11.8207	3.0529e-32	2.57138e-31
C18orf54	677.75	1.10203	0.0932287	11.8207	3.05245e-32	2.57138e-31
SLC15A3	81.6927	-4.10195	0.347145	-11.8163	3.2171e-32	2.70828e-31
SASS6	220.973	-1.8202	0.154144	-11.8084	3.5328e-32	2.97252e-31
CNKSR3	967.31	0.968522	0.0820345	11.8063	3.62224e-32	3.0462e-31
NGEF	199.927	-2.07118	0.175475	-11.8033	3.75331e-32	3.1548e-31
RNF123	2427.69	0.732518	0.0620607	11.8032	3.75567e-32	3.15515e-31
USP22	33430.5	0.574368	0.0486668	11.8021	3.80881e-32	3.19815e-31
DNM3	2926.3	0.751826	0.0637257	11.7978	4.00415e-32	3.36043e-31
YWHAQ	33141.4	0.560143	0.0474886	11.7953	4.12643e-32	3.46128e-31
MGEA5	32699.5	0.534694	0.0453477	11.791	4.34506e-32	3.64279e-31
ARSK	1003.7	0.972427	0.082516	11.7847	4.68021e-32	3.92175e-31
CUBN	445.246	-1.35139	0.114689	-11.783	4.77354e-32	3.9979e-31
RNF114	3810.78	0.624742	0.0530234	11.7824	4.81092e-32	4.02714e-31
KLHL4	488.172	-1.34087	0.113878	-11.7746	5.27569e-32	4.41392e-31
RARRES2	95.2786	-3.29519	0.279884	-11.7734	5.3515e-32	4.47505e-31
TRIM24	3547.61	0.687183	0.0583719	11.7725	5.40908e-32	4.52088e-31
ADORA2B	238.547	-1.81703	0.154379	-11.77	5.57432e-32	4.6566e-31
RHBDD2	3519.89	0.695818	0.0591199	11.7696	5.59769e-32	4.67372e-31
BMP6	201.145	2.04866	0.174087	11.768	5.70404e-32	4.76008e-31
IGF2R	72733.4	0.695243	0.0590983	11.7642	5.97086e-32	4.9802e-31
COL4A6	955.817	-0.934314	0.0794218	-11.764	5.98654e-32	4.99072e-31
FGFRL1	6817.57	0.610809	0.0519779	11.7513	6.95293e-32	5.79339e-31
MTF2	1935.34	0.736565	0.0626974	11.7479	7.23683e-32	6.02687e-31
ARVCF	1265.1	0.96012	0.0817461	11.7451	7.47963e-32	6.22589e-31
NBPF14	2011.48	0.860088	0.0732443	11.7427	7.69642e-32	6.40307e-31
SRPK1	3475.07	0.649288	0.0552954	11.7422	7.74658e-32	6.44152e-31
KIF1A	15402.6	0.766806	0.0653052	11.7419	7.77328e-32	6.46043e-31
MMD	1543.92	0.849658	0.0723656	11.7412	7.83817e-32	6.51104e-31
THRA	1988.64	-0.75758	0.0645384	-11.7384	8.09836e-32	6.72374e-31
NINJ1	736.958	-1.03202	0.0879249	-11.7375	8.18572e-32	6.79281e-31
FGD6	1879.86	0.789098	0.0672442	11.7348	8.45166e-32	7.00993e-31
YBX3	7621.89	-0.585623	0.0499119	-11.7331	8.61946e-32	7.14547e-31
TRIM26	3924.05	-0.646711	0.0551318	-11.7303	8.91622e-32	7.38773e-31
MPND	653.77	1.06023	0.0904032	11.7278	9.1791e-32	7.60168e-31
SLC22A18	238.242	-1.67694	0.143019	-11.7253	9.45379e-32	7.82518e-31
IMPAD1	17137	0.65951	0.0562802	11.7183	1.02689e-31	8.49556e-31
CDCA4	746.658	1.05813	0.0903071	11.717	1.0432e-31	8.62611e-31
RAB3IP	1734.1	0.767452	0.0655049	11.7159	1.05602e-31	8.72769e-31
MUC16	82.3769	-4.61046	0.393706	-11.7104	1.12741e-31	9.31302e-31
MRPL15	1574.15	-0.778128	0.0664624	-11.7078	1.16272e-31	9.59713e-31
ERCC6L2	2092.52	0.710712	0.0607043	11.7078	1.16299e-31	9.59713e-31
PXK	2730.2	-0.759927	0.0649121	-11.707	1.17358e-31	9.67962e-31
DRAXIN	8030.5	-0.927382	0.0792171	-11.7068	1.17571e-31	9.69228e-31
ZC3H10	737.328	1.02811	0.0878277	11.706	1.188e-31	9.78872e-31
PITHD1	3436.34	0.63021	0.0538467	11.7038	1.21873e-31	1.00368e-30
STK39	3703.44	0.666216	0.0569268	11.703	1.2296e-31	1.01213e-30
ZNF28	1733.16	0.75474	0.0644949	11.7023	1.24011e-31	1.02026e-30
SEZ6L2	8987.38	-0.581474	0.0496994	-11.6998	1.27753e-31	1.05051e-30
SERBP1	24448.3	0.686563	0.0587084	11.6945	1.36047e-31	1.11815e-30
PPFIA4	1540.66	-1.1079	0.0947612	-11.6915	1.4085e-31	1.15704e-30
EEF1B2	7377.11	-0.563889	0.0482499	-11.6868	1.48812e-31	1.22183e-30
MOV10L1	78.2127	-5.2694	0.450892	-11.6866	1.49188e-31	1.22431e-30
CCDC24	234.885	-1.74487	0.14933	-11.6847	1.52639e-31	1.25199e-30
STK32A	4971.14	-0.660848	0.0565859	-11.6787	1.63839e-31	1.34318e-30
ZCCHC5	77.3867	-3.70583	0.31749	-11.6723	1.7659e-31	1.44699e-30
FGF7	79.7661	-5.16656	0.442762	-11.6689	1.83748e-31	1.50489e-30
STK3	1140.91	0.891826	0.0764504	11.6654	1.91441e-31	1.5671e-30
MLLT4	9325.09	0.601169	0.0515601	11.6596	2.0505e-31	1.67766e-30
CLPTM1	10764.2	0.586534	0.0503086	11.6587	2.07148e-31	1.69398e-30
TMEM63A	807.522	-0.970963	0.0832912	-11.6575	2.1024e-31	1.7184e-30
ELOVL6	2872.45	0.71838	0.0616274	11.6568	2.11772e-31	1.73006e-30
NUDCD3	7169.77	0.56508	0.0484889	11.6538	2.19419e-31	1.79163e-30
IRAK1	2930.19	-0.677366	0.0581778	-11.643	2.49023e-31	2.03234e-30
TCP11L2	1131.9	-0.870122	0.0747639	-11.6383	2.63317e-31	2.14792e-30
INPP5B	1027	-0.940606	0.0808228	-11.6379	2.64511e-31	2.15657e-30
[truncated: 15,670 more rows]
