# Supplementary material for: High-content synaptic phenotyping in human cellular models reveals a role for BET proteins in synapse assembly
Source: eLife. 2023 Apr 21;12:e80168. doi: 10.7554/eLife.80168 (PMC10121225; doi:10.7554/eLife.80168)
Supplement: Supplementary file 5. [file elife-80168-supp5.xlsx]

## Sheet: sheet1
GO term ID	GO domain	GO term name	GO parent term ID	GSEA p-value	GSEA 'gene cluster' FDR corrected p-value	genes
GO:0099055	CC	integral component of postsynaptic membrane	GO:0045211	0.000295823	0.00502899	KCNC3;SLC6A8;CDH2;PCDH17;NRP2;GABRE;ADRB2;KCNJ2;ITGA3;GRIK2
GO:0045211	CC	postsynaptic membrane	GO:0098794	0.000713852	0.00606774	RGS7;KCNC3;SLC6A8;CDH2;PCDH17;NRP2;GABRE;ADRB2;KCNJ2;ITGA3;GRIK2
GO:0099531	BP	presynaptic process involved in chemical synaptic transmission	GO:0007268	0.00152119		APBA1;NRXN3;ADRB2;BACE1;CHRNA5;NGFR
GO:0099171	BP	presynaptic modulation of chemical synaptic transmission	GO:0099531	0.00152119	0.0304239	APBA1;NRXN3;ADRB2;BACE1;CHRNA5;NGFR
GO:0099536	BP	synaptic signaling	SYNGO:synprocess	0.0033872	0.0304943	NRXN3;DAG1;PRKAR2B;BAIAP2;EPHB1;CDH2;ARC;LRRC4;DLGAP2;APBA1;ADRB2;BACE1;CHRNA5;NGFR;NPY2R
GO:0007268	BP	chemical synaptic transmission	GO:0099537	0.00457415	0.0304943	PRKAR2B;BAIAP2;EPHB1;CDH2;ARC;LRRC4;DLGAP2;APBA1;NRXN3;ADRB2;BACE1;CHRNA5;NGFR
GO:0099537	BP	trans-synaptic signaling	GO:0099536	0.00785318	0.0392659	NRXN3;DAG1;PRKAR2B;BAIAP2;EPHB1;CDH2;ARC;LRRC4;DLGAP2;APBA1;ADRB2;BACE1;CHRNA5;NGFR
GO:0042734	CC	presynaptic membrane	GO:0098793	0.0090371	0.0512102	MARCKSL1;CNTN5;KCNC3;EFNB2;ADAM23;PCDH17;CDH2;CHRM4;NGFR
GO:0050808	BP	synapse organization	SYNGO:synprocess	0.012704	0.050816	FZD9;ITGA3;NRP2;SEMA3F;ABHD17B;BAIAP2;TIAM1;RHOB;DAG1;CDH8;PCDH17;LRRC4;CDH6;EFNB2;CNTN5;CBLN1;LZTS1;NPTXR;NRXN3;NOS1AP;SH3GL2
GO:0099056	CC	integral component of presynaptic membrane	GO:0042734	0.0221788	0.0837157	KCNC3;EFNB2;ADAM23;PCDH17;CDH2;CHRM4;NGFR
GO:0043083	CC	synaptic cleft	GO:0045202	0.0246223	0.0837157	CBLN1;LAMC1;NPTX2
GO:0099173	BP	postsynapse organization	GO:0050808	0.0280761	0.0853213	FZD9;ITGA3;NRP2;SEMA3F;ABHD17B;BAIAP2;TIAM1
GO:0099645	BP	neurotransmitter receptor localization to postsynaptic specialization membrane	GO:0099072	0.0298625	0.0853213	NPTX2;NPTXR;NRXN3;DAG1;TNIK
GO:0098962	BP	regulation of postsynaptic neurotransmitter receptor activity	SYNGO:postsynprocess	0.0415165	0.103791	NPTX2;DLGAP2;NPTXR
SYNGO:synprocess	BP	process in the synapse		0.0482184	0.107152	MARCKSL1;GRIK2;SH3GL2;AMPH;DGKQ;SYT11;FZD9;RGS7;GABRE;NPTX2;DLGAP2;NPTXR;EFNB2;NRXN3;DAG1;TNIK;ARC;PRKAR2B;BAIAP2;EPHB1;CDH2;LRRC4;APBA1;ADRB2;BACE1;CHRNA5;NGFR;NPY2R;ITGA3;NRP2;SEMA3F;ABHD17B;TIAM1;RHOB;CDH8;PCDH17;CDH6;CNTN5;CBLN1;LZTS1;NOS1AP;SLC6A8
GO:0098794	CC	postsynapse	GO:0045202	0.0513324	0.125928	PRKAR2B;EIF4EBP2;DGKQ;DYNLL2;SYT11;NOS1AP;FZD9;SH3GL2;BAIAP2;DAG1;NPTX2;HOMER2;TNIK;DLGAP2;ARC;ABHD17B;LZTS1;TIAM1;EFNB2;LRRC4;CHRM4;RGS7;KCNC3;SLC6A8;CDH2;PCDH17;NRP2;GABRE;ADRB2;KCNJ2;ITGA3;GRIK2
GO:0098839	CC	postsynaptic density membrane	GO:0014069	0.0518526	0.125928	ARC;ABHD17B;LZTS1;TIAM1;EFNB2;LRRC4;CHRM4
GO:0099175	BP	regulation of postsynapse organization	GO:0099173	0.0652806	0.118446	NRP2;SEMA3F;ABHD17B;BAIAP2;TIAM1
GO:0050804	BP	modulation of chemical synaptic transmission	GO:0007268	0.0692895	0.118446	PRKAR2B;BAIAP2;EPHB1;CDH2;ARC;LRRC4;DLGAP2
SYNGO:postsynprocess	BP	process in the postsynapse	SYNGO:synprocess	0.0710676	0.118446	FZD9;RGS7;GABRE;GRIK2;NPTX2;DLGAP2;NPTXR;EFNB2;NRXN3;DAG1;TNIK;ARC
GO:0099560	BP	synapse adhesion between pre- and post-synapse	GO:0050808	0.0770597	0.118553	PCDH17;LRRC4;CDH6;ITGA3
GO:0060078	BP	regulation of postsynaptic membrane potential	SYNGO:postsynprocess	0.0883058	0.126151	RGS7;GABRE;GRIK2
GO:0007416	BP	synapse assembly	GO:0050808	0.127954	0.170605	EFNB2;CNTN5;CBLN1;LZTS1;NPTXR;NRXN3
GO:0099010	BP	modification of postsynaptic structure	GO:0099563	0.149315	0.175665	RHOB;BAIAP2;TIAM1
GO:0098698	BP	postsynaptic specialization assembly	GO:0007416	0.149315	0.175665	NPTXR;NRXN3;CBLN1
GO:0098793	CC	presynapse	GO:0045202	0.150287	0.312342	BACE1;AMPH;DGKQ;TNIK;NOS1AP;RGS7;ITGA2;NPY2R;BAIAP2;MARCKSL1;SH3GL2;APBA1;SYT11;ITGA3;ADRB2;FZD8;CNTN5;KCNC3;EFNB2;ADAM23;PCDH17;CDH2;CHRM4;NGFR
GO:0099563	BP	modification of synaptic structure	GO:0050808	0.160548		RHOB;BAIAP2;TIAM1
GO:0045202	CC	synapse		0.174883	0.312342	SH3GL2;CDH6;RHOB;CDH8;BACE1;AMPH;DGKQ;TNIK;NOS1AP;RGS7;ITGA2;NPY2R;BAIAP2;MARCKSL1;APBA1;SYT11;ITGA3;ADRB2;FZD8;CNTN5;KCNC3;EFNB2;ADAM23;PCDH17;CDH2;CHRM4;NGFR;CBLN1;LAMC1;NPTX2;PRKAR2B;EIF4EBP2;DYNLL2;FZD9;DAG1;HOMER2;DLGAP2;ARC;ABHD17B;LZTS1;TIAM1;LRRC4;SLC6A8;NRP2;GABRE;KCNJ2;GRIK2
GO:0099523	CC	presynaptic cytosol	GO:0098793	0.183731	0.312342	BAIAP2;MARCKSL1;SH3GL2
GO:0099072	BP	regulation of postsynaptic membrane neurotransmitter receptor levels	SYNGO:postsynprocess	0.207541	0.230602	EFNB2;NRXN3;NPTX2;NPTXR;DAG1;TNIK;ARC
GO:0048488	BP	synaptic vesicle endocytosis	GO:0099504	0.23027	0.24239	SH3GL2;AMPH;DGKQ;SYT11
GO:0099092	CC	postsynaptic density, intracellular component	GO:0014069	0.232367	0.359112	BAIAP2;TNIK;DLGAP2
GO:0014069	CC	postsynaptic density	GO:0099572	0.258645	0.366414	HOMER2;DYNLL2;BAIAP2;TNIK;DLGAP2;ARC;ABHD17B;LZTS1;TIAM1;EFNB2;LRRC4;CHRM4
GO:0048787	CC	presynaptic active zone membrane	GO:0048786	0.295785	0.386796	APBA1;SYT11;ITGA3
GO:0099572	CC	postsynaptic specialization	GO:0098794	0.327289	0.397422	NPTX2;HOMER2;DYNLL2;BAIAP2;TNIK;DLGAP2;ARC;ABHD17B;LZTS1;TIAM1;EFNB2;LRRC4;CHRM4
GO:0099061	CC	integral component of postsynaptic density membrane	GO:0098839	0.484565	0.549174	EFNB2;LRRC4;CHRM4
GO:0048786	CC	presynaptic active zone	GO:0098793	0.606563		APBA1;SYT11;ITGA3
GO:0008021	CC	synaptic vesicle	GO:0098793	0.679917	0.722412	MARCKSL1;SH3GL2;AMPH;SYT11
GO:0030672	CC	synaptic vesicle membrane	GO:0008021	0.746707	0.746707	SH3GL2;AMPH;SYT11
SYNGO:presynprocess	BP	process in the presynapse	SYNGO:synprocess	0.885954	0.885954	MARCKSL1;GRIK2;SH3GL2;AMPH;DGKQ;SYT11
GO:0099504	BP	synaptic vesicle cycle	SYNGO:presynprocess	0.928933		SH3GL2;AMPH;DGKQ;SYT11
GO:0097060	CC	synaptic membrane	GO:0045202			CDH8
GO:0099243	CC	extrinsic component of synaptic membrane	GO:0097060
GO:0099699	CC	integral component of synaptic membrane	GO:0097060
GO:0099569	CC	presynaptic cytoskeleton	GO:0098793
GO:0099182	CC	presynaptic intermediate filament cytoskeleton	GO:0099569
GO:0099143	CC	presynaptic actin cytoskeleton	GO:0099569
GO:0098831	CC	presynaptic active zone cytoplasmic component	GO:0048786
GO:0099029	CC	anchored component of presynaptic active zone membrane	GO:0048787
GO:0098891	CC	extrinsic component of presynaptic active zone membrane	GO:0048787
GO:0099059	CC	integral component of presynaptic active zone membrane	GO:0048787			SYT11;ITGA3
GO:0098833	CC	presynaptic endocytic zone	GO:0098793			AMPH
GO:0098835	CC	presynaptic endocytic zone membrane	GO:0098833			AMPH
GO:0098894	CC	extrinsic component of presynaptic endocytic zone membrane	GO:0098835			AMPH
GO:0098830	CC	presynaptic endosome	GO:0098793
GO:0098954	CC	presynaptic endosome membrane	GO:0098830
GO:0099067	CC	integral component of presynaptic endosome membrane	GO:0098954
GO:0034592	CC	synaptic vesicle lumen	GO:0008021
GO:0098993	CC	anchored component of synaptic vesicle membrane	GO:0030672
GO:0098850	CC	extrinsic component of synaptic vesicle membrane	GO:0030672			AMPH
GO:0030285	CC	integral component of synaptic vesicle membrane	GO:0030672			SYT11
GO:0098992	CC	neuronal dense core vesicle	GO:0098793			ADRB2;FZD8
GO:0099013	CC	neuronal dense core vesicle lumen	GO:0098992
GO:0099012	CC	neuronal dense core vesicle membrane	GO:0098992
GO:0098674	CC	extrinsic component of neuronal dense core vesicle membrane	GO:0099012
GO:0099066	CC	integral component of neuronal dense core vesicle membrane	GO:0099012
GO:0099026	CC	anchored component of presynaptic membrane	GO:0042734			MARCKSL1;CNTN5
GO:0098888	CC	extrinsic component of presynaptic membrane	GO:0042734
SYNGO:presyn_ribosome	CC	presynaptic ribosome	GO:0098793
SYNGO:presyn_er	CC	presynaptic ER	GO:0098793
SYNGO:presyn_er_membrane	CC	presynaptic ER membrane	SYNGO:presyn_er
SYNGO:presyn_er_membrane_integral	CC	integral component of presynaptic ER membrane	SYNGO:presyn_er_membrane
SYNGO:presyn_ser	CC	presynaptic SER	SYNGO:presyn_er
SYNGO:presyn_ser_membrane	CC	presynaptic SER membrane	SYNGO:presyn_ser
SYNGO:presyn_ser_membrane_integral	CC	integral component of presynaptic SER membrane	SYNGO:presyn_ser_membrane
GO:0098965	CC	extracellular matrix of synaptic cleft	GO:0043083
GO:0099524	CC	postsynaptic cytosol	GO:0098794			BAIAP2;DAG1
GO:0099571	CC	postsynaptic cytoskeleton	GO:0098794
GO:0099160	CC	postsynaptic intermediate filament cytoskeleton	GO:0099571
GO:0098871	CC	postsynaptic actin cytoskeleton	GO:0099571
GO:0150050	CC	postsynaptic septin cytoskeleton	GO:0099571
GO:0099189	CC	postsynaptic spectrin-associated cytoskeleton	GO:0099571
GO:0097444	CC	spine apparatus	GO:0098794
GO:0098897	CC	spine apparatus membrane	GO:0097444
GO:0099065	CC	integral component of spine apparatus membrane	GO:0098897
GO:0150051	CC	postsynaptic Golgi apparatus	GO:0098794
GO:0099091	CC	postsynaptic specialization, intracellular component	GO:0099572
GO:0099634	CC	postsynaptic specialization membrane	GO:0099572			NPTX2
GO:0098892	CC	extrinsic component of postsynaptic specialization membrane	GO:0099634			NPTX2
GO:0099060	CC	integral component of postsynaptic specialization membrane	GO:0099634
GO:0099031	CC	anchored component of postsynaptic density membrane	GO:0098839			ABHD17B;LZTS1
GO:0099147	CC	extrinsic component of postsynaptic density membrane	GO:0098839			TIAM1
GO:0099629	CC	postsynaptic specialization of symmetric synapse	GO:0099572
GO:0098843	CC	postsynaptic endocytic zone	GO:0098794
GO:0098844	CC	postsynaptic endocytic zone membrane	GO:0098843
GO:0098845	CC	postsynaptic endosome	GO:0098794			ARC;ABHD17B
GO:0098895	CC	postsynaptic endosome membrane	GO:0098845
GO:0098999	CC	extrinsic component of postsynaptic endosome membrane	GO:0098895
GO:0098842	CC	postsynaptic early endosome	GO:0098845
GO:0098896	CC	postsynaptic early endosome membrane	GO:0098842
GO:0098998	CC	extrinsic component of postsynaptic early endosome membrane	GO:0098896
GO:0098837	CC	postsynaptic recycling endosome	GO:0098845			ABHD17B
GO:0098944	CC	postsynaptic recycling endosome membrane	GO:0098837			ABHD17B
GO:0099033	CC	anchored component of postsynaptic recycling endosome membrane	GO:0098944			ABHD17B
GO:0099025	CC	anchored component of postsynaptic membrane	GO:0045211
GO:0098890	CC	extrinsic component of postsynaptic membrane	GO:0045211
SYNGO:postsyn_ribosome	CC	postsynaptic ribosome	GO:0098794
SYNGO:postsyn_er	CC	postsynaptic ER	GO:0098794
SYNGO:postsyn_er_membrane	CC	postsynaptic ER membrane	SYNGO:postsyn_er
SYNGO:postsyn_er_membrane_integral	CC	integral component of postsynaptic ER membrane	SYNGO:postsyn_er_membrane
SYNGO:postsyn_ser	CC	postsynaptic SER	SYNGO:postsyn_er
SYNGO:postsyn_ser_membrane	CC	postsynaptic SER membrane	SYNGO:postsyn_ser
SYNGO:postsyn_ser_membrane_integral	CC	integral component of postsynaptic SER membrane	SYNGO:postsyn_ser_membrane
GO:0099544	CC	extrasynaptic space	GO:0045202
GO:0098966	CC	perisynaptic extracellular matrix	GO:0099544
GO:0099509	BP	regulation of presynaptic cytosolic calcium levels	SYNGO:presynprocess			MARCKSL1
GO:1905056	BP	ATPase-coupled calcium ion transmembrane transporter activity involved in regulation of presynaptic cytosolic calcium levels	GO:0099509
GO:0099534	BP	calcium ion binding involved in regulation of presynaptic cytosolic calcium levels	GO:0099509
GO:0099626	BP	voltage-gated calcium channel activity involved in regulation of presynaptic cytosolic calcium levels	GO:0099509
GO:0099505	BP	regulation of presynaptic membrane potential	SYNGO:presynprocess			GRIK2
GO:0099507	BP	ligand-gated ion channel activity involved in regulation of presynaptic membrane potential	GO:0099505			GRIK2
GO:0099508	BP	voltage-gated ion channel activity involved in regulation of presynaptic membrane potential	GO:0099505
GO:0150047	BP	G protein-coupled neurotransmitter receptor activity involved in regulation of presynaptic membrane potential	GO:0099505
GO:0140232	BP	intracellular cAMP-activated cation channel activity involved in regulation of presynaptic membrane potential	GO:0099505
GO:0140238	BP	presynaptic endocytosis	SYNGO:presynprocess
GO:0098693	BP	regulation of synaptic vesicle cycle	GO:0099504
GO:0097091	BP	synaptic vesicle clustering	GO:0099504
GO:0099532	BP	synaptic vesicle endosomal processing	GO:0099504
GO:0016182	BP	synaptic vesicle budding from endosome	GO:0099532
GO:0016189	BP	synaptic vesicle to endosome fusion	GO:0099532
GO:0016079	BP	synaptic vesicle exocytosis	GO:0099504
GO:0099502	BP	calcium-dependent activation of synaptic vesicle fusion	GO:0016079
GO:0150037	BP	regulation of calcium-dependent activation of synaptic vesicle fusion	GO:0099502
GO:2000300	BP	regulation of synaptic vesicle exocytosis	GO:0016079
GO:0016081	BP	synaptic vesicle docking	GO:0016079
GO:0099148	BP	regulation of synaptic vesicle docking	GO:0016081
GO:0031629	BP	synaptic vesicle fusion to presynaptic active zone membrane	GO:0016079
GO:0031630	BP	regulation of synaptic vesicle fusion to presynaptic active zone membrane	GO:0031629
GO:0016082	BP	synaptic vesicle priming	GO:0016079
GO:0010807	BP	regulation of synaptic vesicle priming	GO:0016082
GO:0098700	BP	synaptic vesicle neurotransmitter loading	GO:0099504
GO:0099162	BP	regulation of synaptic vesicle neurotransmitter loading	GO:0098700
GO:0099180	BP	zinc ion import into synaptic vesicle	GO:0099504
GO:0097401	BP	synaptic vesicle proton loading	GO:0099504
GO:1901546	BP	regulation of proton loading	GO:0097401
GO:1900242	BP	regulation of synaptic vesicle endocytosis	GO:0048488			DGKQ;SYT11
GO:0016185	BP	synaptic vesicle budding from presynaptic endocytic zone membrane	GO:0048488
GO:0098694	BP	regulation of synaptic vesicle budding from presynaptic endocytic zone membrane	GO:0016185
GO:0016191	BP	synaptic vesicle uncoating	GO:0048488
GO:0099525	BP	presynaptic dense core vesicle exocytosis	SYNGO:presynprocess
GO:0099161	BP	regulation of presynaptic dense core vesicle exocytosis	GO:0099525
GO:0001504	BP	neurotransmitter uptake	SYNGO:presynprocess
GO:0098810	BP	neurotransmitter reuptake	SYNGO:presynprocess
GO:0051580	BP	regulation of neurotransmitter uptake	GO:0098810
SYNGO:presyn_chaperoneProteinFolding	BP	presynaptic chaperone-mediated protein folding	SYNGO:presynprocess
GO:0098928	BP	presynaptic signaling pathway	SYNGO:presynprocess
GO:0099526	BP	presynapse to nucleus signaling pathway	GO:0098928
GO:0099566	BP	regulation of postsynaptic cytosolic calcium levels	SYNGO:postsynprocess			FZD9
GO:1905059	BP	ATPase-coupled calcium ion transmembrane transporter activity involved in regulation of postsynaptic cytosolic calcium levels	GO:0099566
GO:0099567	BP	calcium ion binding involved in regulation of postsynaptic cytosolic calcium levels	GO:0099566
GO:1905060	BP	calcium:cation antiporter activity involved in regulation of postsynaptic cytosolic calcium ion levels	GO:0099566
GO:0098695	BP	inositol 1,4,5-trisphosphate receptor activity involved in regulation of postsynaptic cytosolic calcium levels	GO:0099566
GO:0099583	BP	neurotransmitter receptor activity involved in regulation of postsynaptic cytosolic calcium levels	GO:0099566
GO:0098872	BP	G-protein coupled neurotransmitter receptor activity involved in regulation of postsynaptic cytosolic calcium levels	GO:0099583
GO:0140233	BP	intracellular cAMP-activated cation channel activity involved in regulation of postsynaptic membrane potential	GO:0060078
GO:0099579	BP	G protein-coupled neurotransmitter receptor activity involved in regulation of postsynaptic membrane potential	GO:0140233
GO:1904315	BP	transmitter-gated ion channel activity involved in regulation of postsynaptic membrane potential	GO:0060078			GABRE;GRIK2
GO:1905030	BP	voltage-gated ion channel activity involved in regulation of postsynaptic membrane potential	GO:0060078
GO:0098696	BP	regulation of neurotransmitter receptor localization to postsynaptic specialization membrane	GO:0099645			DAG1;TNIK
GO:0098967	BP	exocytic insertion of neurotransmitter receptor to postsynaptic membrane	GO:0099072
GO:0099145	BP	regulation of exocytic insertion of neurotransmitter receptor to postsynaptic membrane	GO:0098967
GO:0098970	BP	postsynaptic neurotransmitter receptor diffusion trapping	GO:0099072
GO:0150054	BP	regulation of postsynaptic neurotransmitter receptor diffusion trapping	GO:0098970
GO:0098884	BP	postsynaptic neurotransmitter receptor endocytosis	GO:0099072			EFNB2;ARC
GO:0099149	BP	regulation of postsynaptic neurotransmitter receptor endocytosis	GO:0098884			EFNB2;ARC
GO:0150038	BP	postsynaptic dense core vesicle exocytosis	SYNGO:postsynprocess
GO:0150044	BP	regulation of postsynaptic dense core vesicle exocytosis	GO:0150038
GO:0098926	BP	postsynaptic signaling pathway	SYNGO:postsynprocess
GO:0099527	BP	postsynapse to nucleus signaling pathway	GO:0098926
GO:1905539	BP	regulation of postsynapse to nucleus signaling pathway	GO:0099527
GO:0099541	BP	trans-synaptic signaling by lipid	GO:0099537
GO:0099542	BP	trans-synaptic signaling by endocannabinoid	GO:0099541
GO:0098921	BP	retrograde trans-synaptic signaling by endocannabinoid	GO:0099542
GO:0099178	BP	regulation of retrograde trans-synaptic signaling by endocanabinoid	GO:0098921
GO:0099553	BP	trans-synaptic signaling by endocannabinoid, modulating synaptic transmission	GO:0099542
GO:0150036	BP	regulation of trans-synaptic signaling by endocannabinoid, modulating synaptic transmission	GO:0099553
GO:0099540	BP	trans-synaptic signaling by neuropeptide	GO:0099537
GO:0099543	BP	trans-synaptic signaling by soluble gas	GO:0099537
GO:0099548	BP	trans-synaptic signaling by nitric oxide	GO:0099543
GO:0099555	BP	trans-synaptic signaling by nitric oxide, modulating synaptic transmission	GO:0099548
GO:0098925	BP	retrograde trans-synaptic signaling by nitric oxide, modulating synaptic transmission	GO:0099555
GO:0099545	BP	trans-synaptic signaling by trans-synaptic complex	GO:0099537			DAG1
GO:0098942	BP	retrograde trans-synaptic signaling by trans-synaptic protein complex	GO:0099545			DAG1
GO:0099557	BP	trans-synaptic signaling by trans-synaptic complex, modulating synaptic transmission	GO:0099545
GO:0099157	BP	trans-synaptic signalling via exosome	GO:0099537
GO:0099183	BP	trans-synaptic signaling by BDNF, modulating synaptic transmission	GO:0099537
GO:0150035	BP	regulation of trans-synaptic signaling by BDNF, modulating synaptic transmission	GO:0099183
GO:0099565	BP	postsynaptic process involved in chemical synaptic transmission	GO:0007268
GO:0099170	BP	postsynaptic modulation of chemical synaptic transmission	GO:0099565
GO:0099538	BP	synaptic signaling via neuropeptide	GO:0099536			NPY2R
GO:0099163	BP	synaptic signaling by nitric oxide	GO:0099536
GO:0150045	BP	regulation of synaptic signaling by nitric oxide	GO:0099163
GO:0099172	BP	presynapse organization	GO:0050808
GO:0099174	BP	regulation of presynapse organization	GO:0099172
GO:0099084	BP	postsynaptic specialization organization	GO:0099173
GO:0099159	BP	regulation of modification of postsynaptic structure	GO:0099010			RHOB
GO:0098885	BP	modification of postsynaptic actin cytoskeleton	GO:0099010			BAIAP2;TIAM1
GO:1905274	BP	regulation of modification of postsynaptic actin cytoskeleton	GO:0098885			BAIAP2;TIAM1
GO:0050807	BP	regulation of synapse organization	GO:0050808			DAG1;CDH8
GO:0098918	BP	structural constituent of synapse	GO:0050808
GO:0099181	BP	structural constituent of presynapse	GO:0098918
GO:0098882	BP	structural constituent of active zone	GO:0099181
GO:0098699	BP	structural constituent of presynaptic actin cytoskeleton	GO:0099181
GO:0099186	BP	structural constituent of postsynapse	GO:0098918
GO:0098973	BP	structural constituent of postsynaptic actin cytoskeleton	GO:0099186
GO:0099184	BP	structural constituent of postsynaptic intermediate filament cytoskeleton	GO:0099186
GO:0098879	BP	structural constituent of postsynaptic specialization	GO:0099186
GO:0098919	BP	structural constituent of postsynaptic density	GO:0099186
GO:0150043	BP	structural constituent of synapse-associated extracellular matrix	GO:0050808
GO:0099179	BP	regulation of synaptic membrane adhesion	GO:0099560
GO:0008039	BP	synaptic target recognition	GO:0050808
GO:0099054	BP	presynapse assembly	GO:0007416			EFNB2;CNTN5
GO:0051963	BP	regulation of synapse assembly	GO:0007416			CBLN1;LZTS1
GO:1905606	BP	regulation of presynapse assembly	GO:0051963			CBLN1
GO:0150052	BP	regulation of postsynapse assembly	GO:0051963			LZTS1
GO:0099150	BP	regulation of postsynaptic specialization assembly	GO:0098698			NPTXR
GO:0097107	BP	postsynaptic density assembly	GO:0098698			NRXN3;CBLN1
GO:0099151	BP	regulation of postsynaptic density assembly	GO:0097107			CBLN1
GO:0097104	BP	postsynaptic membrane assembly	GO:0007416
GO:0098883	BP	synapse disassembly	GO:0050808
GO:1905806	BP	regulation of synapse disassembly	GO:0098883
GO:0060074	BP	synapse maturation	GO:0050808
GO:0090128	BP	regulation of synapse maturation	GO:0060074
GO:0099558	BP	maintenance of synapse structure	GO:0050808
GO:0099559	BP	maintenance of alignment of postsynaptic density and presynaptic active zone	GO:0099558
GO:0098880	BP	maintenance of postsynaptic specialization structure	GO:0099558
GO:0099562	BP	maintenance of postsynaptic density structure	GO:0098880
GO:0099187	BP	presynaptic cytoskeleton organization	GO:0050808
GO:0099140	BP	presynaptic actin cytoskeleton organization	GO:0099187
GO:0099188	BP	postsynaptic cytoskeleton organization	GO:0050808			NOS1AP;SH3GL2
GO:0098974	BP	postsynaptic actin cytoskeleton organization	GO:0099188			NOS1AP;SH3GL2
GO:0099190	BP	postsynaptic spectrin-associated cytoskeleton organization	GO:0099188
SYNGO:metabolism	BP	metabolism	SYNGO:synprocess			SLC6A8;ABHD17B
SYNGO:presyn_ATPmetabolic	BP	ATP metabolic process in the presynapse	SYNGO:metabolism
SYNGO:presyn_regulationATPmetabolic	BP	regulation of ATP metabolic process in the presynapse	SYNGO:presyn_ATPmetabolic
SYNGO:postsyn_ATPmetabolic	BP	ATP metabolic process in the postsynapse	SYNGO:metabolism
GO:0099546	BP	protein catabolic process, modulating synaptic transmission	SYNGO:metabolism
GO:0099574	BP	regulation of protein catabolic process at synapse, modulating synaptic transmission	SYNGO:metabolism
GO:0099576	BP	regulation of protein catabolic process at postsynapse, modulating synaptic transmission	GO:0099574
GO:0099575	BP	regulation of protein catabolic process at presynapse, modulating synaptic transmission	GO:0099574
GO:0099547	BP	regulation of translation at synapse, modulating synaptic transmission	SYNGO:metabolism
GO:0099578	BP	regulation of translation at postsynapse, modulating synaptic transmission	GO:0099547
GO:0099577	BP	regulation of translation at presynapse, modulating synaptic transmission	GO:0099547
GO:0042135	BP	neurotransmitter catabolic process	SYNGO:metabolism
GO:0140246	BP	protein catabolic process at synapse	SYNGO:metabolism
GO:0140247	BP	protein catabolic process at presynapse	GO:0140246
GO:0140251	BP	regulation protein catabolic process at presynapse	GO:0140247
GO:0140249	BP	protein catabolic process at postsynapse	GO:0140246
GO:0140252	BP	regulation protein catabolic process at postsynapse	GO:0140249
GO:0042136	BP	neurotransmitter biosynthetic process	SYNGO:metabolism
GO:0140241	BP	translation at synapse	SYNGO:metabolism
GO:0140236	BP	translation at presynapse	GO:0140241
GO:0140242	BP	translation at postsynapse	GO:0140241
GO:0140245	BP	regulation of translation at postsynapse	GO:0140242
GO:0140235	BP	RNA polyadenylation at postsynapse	SYNGO:metabolism
SYNGO:transport	BP	transport	SYNGO:synprocess
GO:0008088	BP	axo-dendritic transport	SYNGO:transport
GO:0098930	BP	axonal transport	GO:0008088
GO:0008089	BP	anterograde axonal transport	GO:0098930
GO:0099641	BP	anterograde axonal protein transport	GO:0008089
GO:0140231	BP	anterograde axonal transport of neurotransmitter receptor complex	GO:0008089
GO:0099088	BP	axonal transport of messenger ribonucleoprotein complex	GO:0098930
GO:0098935	BP	dendritic transport	GO:0008088
GO:0098937	BP	anterograde dendritic transport	GO:0098935
GO:0098971	BP	anterograde dendritic transport of neurotransmitter receptor complex	GO:0098937
GO:0098939	BP	dendritic transport of mitochondrion	GO:0098935
GO:0098961	BP	dendritic transport of ribonucleoprotein complex	GO:0098935
GO:0098963	BP	dendritic transport of messenger ribonucleoprotein complex	GO:0098961
GO:0098964	BP	anterograde dendritic transport of messenger ribonucleoprotein complex	GO:0098963
GO:0099514	BP	synaptic vesicle cytoskeletal transport	SYNGO:transport
GO:0099517	BP	synaptic vesicle transport along microtubule	GO:0099514
GO:0048490	BP	anterograde synaptic vesicle transport	GO:0099517
GO:1903742	BP	regulation of anterograde synaptic vesicle transport	GO:0048490
GO:0099090	BP	synaptic vesicle recycling via endosome	SYNGO:transport
GO:0099158	BP	regulation of recycling endosome localization within postsynapse	GO:0099090
GO:0099089	BP	establishment of endoplasmic reticulum localization to postsynapse	SYNGO:transport
GO:0099637	BP	neurotransmitter receptor transport	SYNGO:transport
GO:0098877	BP	neurotransmitter receptor transport to plasma membrane	GO:0099637
GO:0098969	BP	neurotransmitter receptor transport to postsynaptic membrane	GO:0098877
GO:0099639	BP	neurotransmitter receptor transport, endosome to plasma membrane	GO:0098877
GO:0098887	BP	neurotransmitter receptor transport, endosome to postsynaptic membrane	GO:0099639
GO:0099152	BP	regulation of neurotransmitter receptor transport, endosome to postsynaptic membrane	GO:0098887
GO:0098943	BP	neurotransmitter receptor transport, postsynaptic endosome to lysosome	GO:0099637
