# Supplementary figures and images for: High-content synaptic phenotyping in human cellular models reveals a role for BET proteins in synapse assembly
Source: eLife journal article supplement (doi:10.7554/elife.80168), 2023-04-12

Source data - SYNAPSIN1 western blots

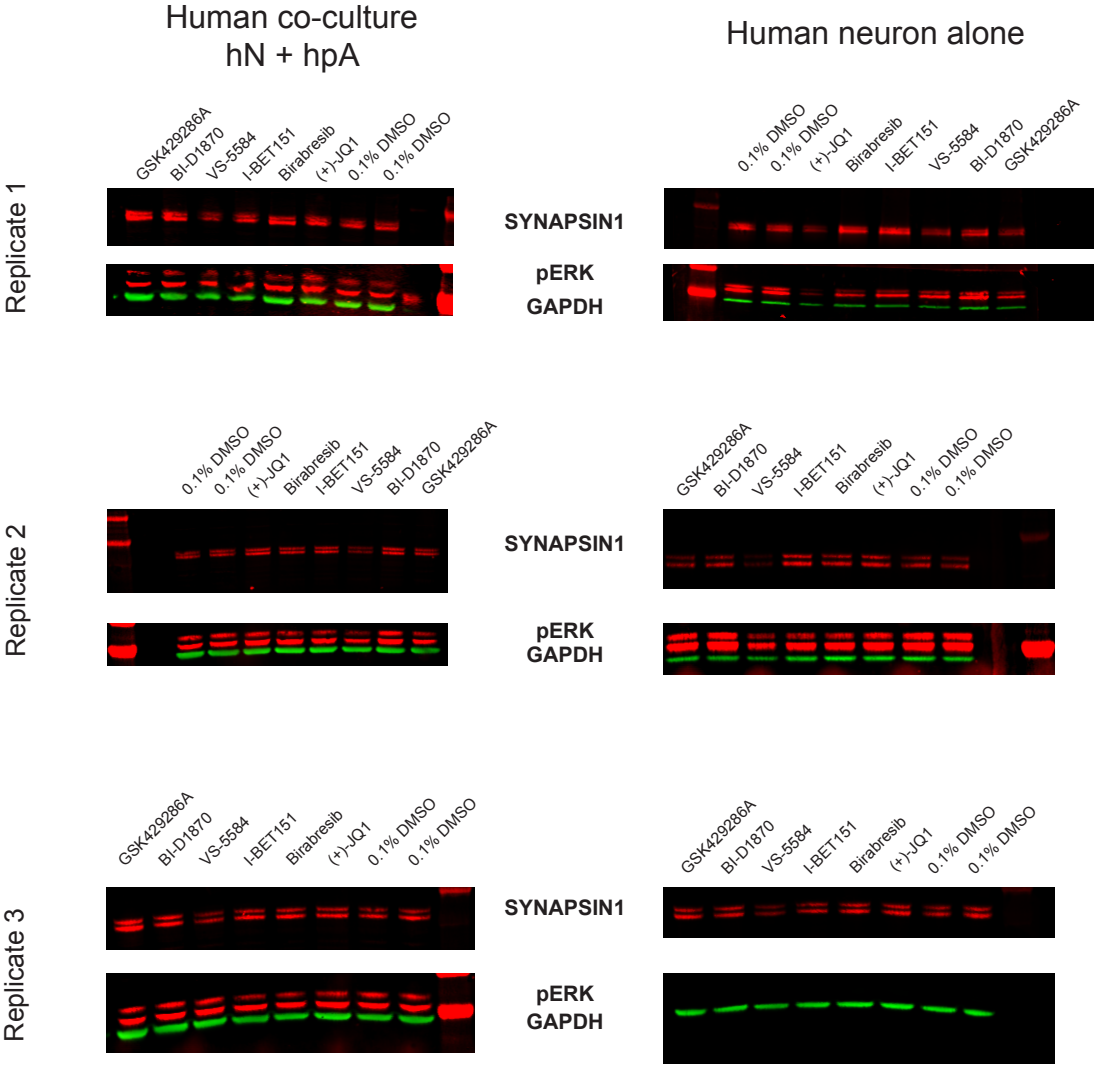

Supplement: fig4-data1 [file Figure 4-source data.pdf › Figure 4-source data 1/Figure 4-source data.pdf]

Source data - BAIAP2 and Homer1 western blots

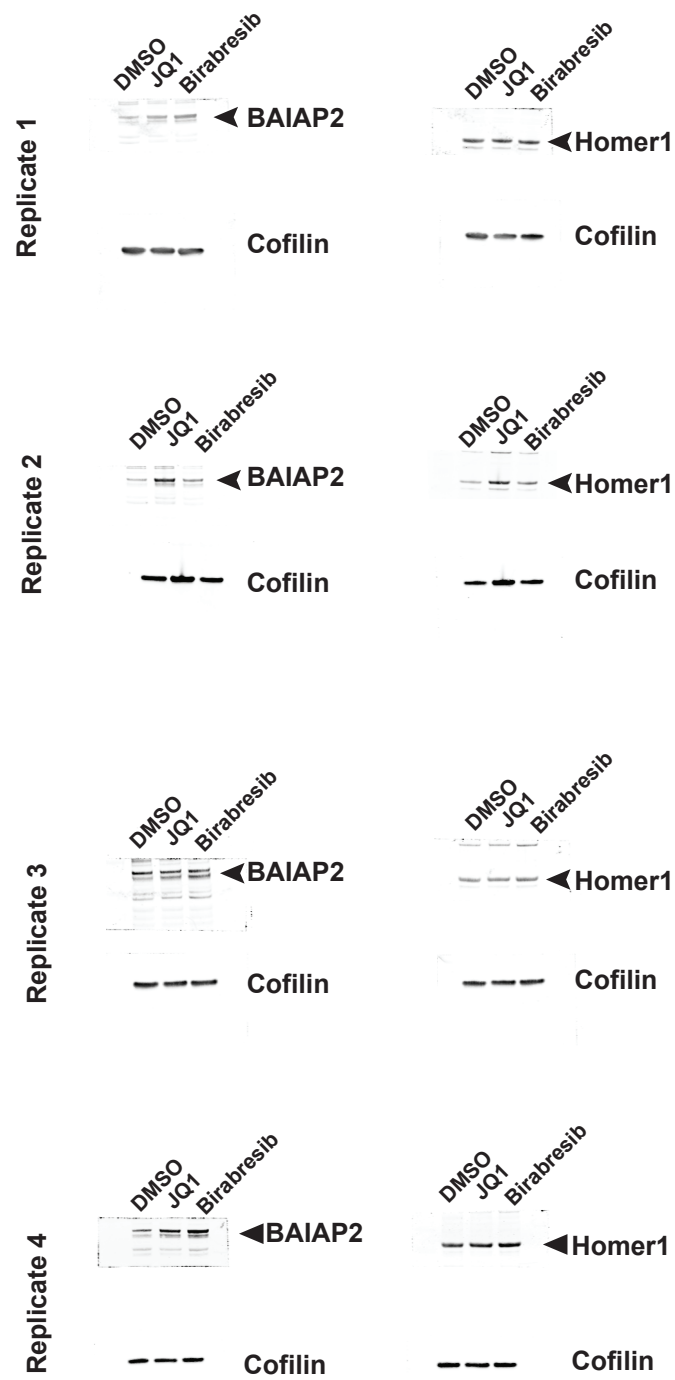

Supplement: fig6-data1 [file elife-80168-fig6-data1-v1.zip]
